# Supplementary material for: Computational Prediction and Experimental Assessment of Secreted/Surface Proteins from Mycobacterium tuberculosis H37Rv
Source: PLoS Comput Biol. 2010 Jun 24;6(6):e1000824. doi: 10.1371/journal.pcbi.1000824 (PMC2891697; doi:10.1371/journal.pcbi.1000824)
Supplement: Table S1 — Proteins predicted by SignalP 3.0. This file contains the predictions yielded by SignalP 3.0 for the complete genome of M. tuberculosis H37Rv with their corresponding transmembrane topology and general localization predictions. In the last table column entitled “shared”, proteins that were also positively predicted by any of the other feature-based tools are labeled with an “x” (File format: .xls). (0.33 MB XLS) [file pcbi.1000824.s001.xls]

## Sheet: SignalP 3.0
Protein	Tuberculist annotation	SignalP 3.0			Subcellular localization					Phobius	TMHMM 2.0				Shared
		Signal sequence probability	Max. Probability of cleavage site	Cleavage site	PA-SUB v.2.5			Gpos-PLoc	PSOTRb v.2.0.4	ID/helices/signal sequence/PREDICTION	ExpAA	First 60	Number of helices	Topology	TatP 1.0	LipoP 1.0	SecretomeP 2.0
Rv0011c	PROBABLE CONSERVED TRANSMEMBRANE PROTEIN	0.993	0.431	57-58	Not cytoplasm	Not extracellular	plasma membrane	Plasma membrane	CytoplasmicMembrane	Rv0011c 2 0 i31-53o73-90i	ExpAA=44.90	First60=22.79	PredHel=2	Topology=i29-51o66-88i			x
Rv0016c	PROBABLE PENICILLIN-BINDING PROTEIN PBPA	0.999	0.748	30-31	Not cytoplasm	Not extracellular	plasma membrane	Extracell	CytoplasmicMembrane	Rv0016c 0 Y n10-21c30/31o	ExpAA=21.71	First60=21.69	PredHel=1	Topology=i7-29o
Rv0017c	PROBABLE CELL DIVISION PROTEIN RODA	0.976	0.976	42-43	Not cytoplasm	Not extracellular	plasma membrane	Plasma membrane	CytoplasmicMembrane	Rv0017c 12 0 i21-40o52-70i79-97o117-135i144-166o186-204i225-242o248-264i269-288o353-374i386-407o419-440i	ExpAA=253.58	First60=31.63	PredHel=12	Topology=i20-42o52-74i79-101o116-135i144-166o181-203i246-263o267-289i310-332o347-369i382-404o419-441i			x
Rv0039c	POSSIBLE CONSERVED TRANSMEMBRANE PROTEIN	0.983	0.373	29-30	Not cytoplasm	Not extracellular	plasma membrane	Extracell	CytoplasmicMembrane	Rv0039c 2 Y n3-18c22/23o38-58i65-85o	ExpAA=63.15	First60=41.57	PredHel=3	Topology=i2-24o39-61i66-88o			x
Rv0040c	SECRETED PROLINE RICH PROTEIN MTC28 (PROLINE RICH 28 KDA ANTIGEN)	1	0.585	32-33	Not cytoplasm	Not extracellular	Not plasma membrane	Extracell	Unknown	Rv0040c 0 Y n16-27c32/33o	ExpAA=20.23	First60=20.22	PredHel=1	Topology=i7-26o	x		x
Rv0063	POSSIBLE OXIDOREDUCTASE	0.999	0.899	31-32	Not cytoplasm	Not extracellular	Not plasma membrane	Extracell	Unknown	Rv0063 0 Y n13-24c29/30o	ExpAA=3.35	First60=2.91	PredHel=0	Topology=o	x
Rv0072	PROBABLE GLUTAMINE-TRANSPORT TRANSMEMBRANE PROTEIN ABC TRANSPORTER	0.984	0.854	44-45	Not cytoplasm	Not extracellular	plasma membrane	Plasma membrane	CytoplasmicMembrane	Rv0072 3 Y n16-27c39/40o231-254i274-297o303-329i	ExpAA=92.58	First60=22.13	PredHel=4	Topology=i16-38o231-253i274-296o306-328i			x
Rv0086	POSSIBLE HYDROGENASE HYCQ	0.92	0.454	35-36	Not cytoplasm	Not extracellular	plasma membrane	Plasma membrane	CytoplasmicMembrane	Rv0086 12 0 o6-24i31-49o69-92i104-122o128-146i158-182o243-264i276-296o316-338i374-397o409-429i441-469o	ExpAA=272.44	First60=42.82	PredHel=12	Topology=o5-24i31-53o68-90i103-122o127-147i160-182o242-264i277-299o314-336i374-396o411-433i453-475o			x
Rv0102	PROBABLE CONSERVED INTEGRAL MEMBRANE PROTEIN	0.842	0.735	51-52	Not cytoplasm	Not extracellular	plasma membrane	Plasma membrane	CytoplasmicMembrane	Rv0102 16 0 i27-48o68-88i109-130o156-173i180-198o210-231i243-266o278-299i311-331o370-389i401-419o439-460i481	ExpAA=346.80	First60=22.01	PredHel=16	Topology=i25-47o67-89i113-135o155-173i180-199o214-236i243-265o280-299i311-333o370-389i401-423o438-460i483-505o520-539i552-574o597-619i			x
Rv0107c	PROBABLE CATION-TRANSPORTER ATPASE I CTPI	0.913	0.609	33-34	Not cytoplasm	Not extracellular	plasma membrane	Plasma membrane	CytoplasmicMembrane	Rv0107c 2 0 o972-989i1546-1567o	ExpAA=69.67	First60=0.04	PredHel=0	Topology=o	x
Rv0109	PE-PGRS FAMILY PROTEIN	1	0.729	33-34	Not cytoplasm	Not extracellular	plasma membrane	Extracell	Extracellular	Rv0109 0 Y n3-15c33/34o	ExpAA=1.22	First60=0.77	PredHel=0	Topology=o			x
Rv0116c	POSSIBLE CONSERVED MEMBRANE PROTEIN	1	0.543	47-48	Not cytoplasm	Not extracellular	Not plasma membrane	Plasma membrane	Unknown	Rv0116c 0 Y n8-19c28/29o	ExpAA=31.25	First60=30.69	PredHel=1	Topology=i7-29o
Rv0124	PE-PGRS FAMILY PROTEIN	0.999	0.823	33-34	Not cytoplasm	Not extracellular	plasma membrane	Extracell	Extracellular	Rv0124 0 0 i	ExpAA=1.10	First60=0.95	PredHel=0	Topology=o			x
Rv0125	PROBABLE SERINE PROTEASE PEPA (SERINE PROTEINASE) (MTB32A)	1	0.993	32-33	Not cytoplasm	Not extracellular	plasma membrane	Extracell	Unknown	Rv0125 0 Y n14-25c32/33o	ExpAA=21.57	First60=21.39	PredHel=1	Topology=i13-35o	x		x
Rv0129c	SECRETED ANTIGEN 85-C FBPC (85C) (ANTIGEN 85 COMPLEX C) (AG58C) (MYCOLYL TRANSFERASE 85C) (FIBRONECTIN-BINDING PROTEIN C)	1	0.969	46-47	Not cytoplasm	extracellular	Not plasma membrane	Extracell	Extracellular	Rv0129c 1 0 i21-40o	ExpAA=22.78	First60=22.30	PredHel=1	Topology=i21-43o	x		x
Rv0132c	PUTATIVE F420-DEPENDENT GLUCOSE-6-PHOSPHATE DEHYDROGENASE FGD2	0.958	0.377	32-33	cytoplasm	Not extracellular	Not plasma membrane	Cytoplasm	Unknown	Rv0132c 0 Y n8-19c24/25o	ExpAA=10.19	First60=5.58	PredHel=0	Topology=o	x
Rv0152c	PE FAMILY PROTEIN	0.533	0.168	46-47	cytoplasm	Not extracellular	Not plasma membrane	Extracell	Unknown	Rv0152c 0 0 i	ExpAA=24.64	First60=0.10	PredHel=0	Topology=o
Rv0170	MCE-FAMILY PROTEIN MCE1B	0.606	0.551	29-30	cytoplasm	Not extracellular	Not plasma membrane	Cytoplasm	Unknown	Rv0170 1 0 o6-28i	ExpAA=22.60	First60=22.60	PredHel=1	Topology=i7-29o
Rv0171	MCE-FAMILY PROTEIN MCE1C	1	0.992	38-39	Not cytoplasm	Not extracellular	Not plasma membrane	Extracell	Cytoplasmic	Rv0171 0 Y n12-23c27/28o	ExpAA=21.41	First60=21.41	PredHel=1	Topology=i12-34o			x
Rv0172	MCE-FAMILY PROTEIN MCE1D	0.93	0.619	32-33	cytoplasm	Not extracellular	Not plasma membrane	Extracell	Unknown	Rv0172 1 0 i20-41o	ExpAA=21.69	First60=21.54	PredHel=1	Topology=i20-42o			x
Rv0173	POSSIBLE MCE-FAMILY LIPOPROTEIN LPRK (MCE-FAMILY LIPOPROTEIN MCE1E)	0.814	0.244	50-51	Not cytoplasm	Not extracellular	plasma membrane	Cytoplasm	Unknown	Rv0173 0 Y n18-28c32/33o	ExpAA=18.37	First60=18.27	PredHel=1	Topology=i19-36o
Rv0174	MCE-FAMILY PROTEIN MCE1F	0.574	0.466	25-26	Not cytoplasm	extracellular	Not plasma membrane	Extracell	Unknown	Rv0174 1 0 i12-29o	ExpAA=20.57	First60=20.56	PredHel=1	Topology=i12-29o			x
Rv0179c	POSSIBLE LIPOPROTEIN LPRO	0.999	0.969	44-45	cytoplasm	Not extracellular	Not plasma membrane	Extracell	Unknown	Rv0179c 0 Y n20-35c44/45o	ExpAA=20.39	First60=20.06	PredHel=1	Topology=i20-42o	x
Rv0194	PROBABLE DRUGS-TRANSPORT TRANSMEMBRANE ATP-BINDING PROTEIN ABC TRANSPORTER	0.846	0.357	51-52	Not cytoplasm	Not extracellular	plasma membrane	Plasma membrane	CytoplasmicMembrane	Rv0194 10 0 i20-41o56-76i144-173o255-285i627-648o660-681i743-761o767-785i848-868o874-895i	ExpAA=218.35	First60=26.37	PredHel=9	Topology=i20-41o56-75i144-166o626-648i660-682o741-763i768-785o847-869i876-898o
Rv0200	POSSIBLE CONSERVED TRANSMEMBRANE PROTEIN	0.885	0.767	23-24	Not cytoplasm	Not extracellular	plasma membrane	Plasma membrane	CytoplasmicMembrane	Rv0200 3 0 i7-28o34-56i77-96o	ExpAA=70.88	First60=45.57	PredHel=3	Topology=i7-29o33-55i75-97o			x
Rv0202c	PROBABLE CONSERVED TRANSMEMBRANE TRANSPORT PROTEIN MMPL11	0.978	0.487	32-33	Not cytoplasm	Not extracellular	plasma membrane	Plasma membrane	CytoplasmicMembrane	Rv0202c 11 Y n13-24c29/30o184-202i207-226o232-254i275-299o311-333i370-392o526-545i557-578o598-618i639-662o668-	ExpAA=259.96	First60=20.28	PredHel=12	Topology=i13-32o183-205i207-229o233-255i276-298o308-330i370-392o530-552i557-579o594-616i643-662o666-688i			x
Rv0203	POSSIBLE EXPORTED PROTEIN	1	0.526	37-38	cytoplasm	Not extracellular	Not plasma membrane	Plasma membrane	Unknown	Rv0203 0 Y n12-22c30/31o	ExpAA=19.78	First60=19.63	PredHel=1	Topology=i12-30o
Rv0227c	PROBABLE CONSERVED MEMBRANE PROTEIN	0.996	0.597	32-33	cytoplasm	Not extracellular	Not plasma membrane	Cytoplasm	Unknown	Rv0227c 1 Y n4-23c29/30o319-341i	ExpAA=43.63	First60=21.73	PredHel=2	Topology=i5-27o319-341i			x
Rv0229c	POSSIBLE CONSERVED MEMBRANE PROTEIN WITH PIN DOMAIN	0.958	0.957	29-30	Not cytoplasm	Not extracellular	plasma membrane	Cytoplasm	Cytoplasmic	Rv0229c 1 0 i7-27o	ExpAA=21.24	First60=21.24	PredHel=1	Topology=i7-29o
Rv0233	PROBABLE RIBONUCLEOSIDE-DIPHOSPHATE REDUCTASE (BETA CHAIN) NRDB (RIBONUCLEOTIDE REDUCTASE SMALL CHAIN)	0.851	0.814	25-26	cytoplasm	Not extracellular	Not plasma membrane	Cytoplasm	Cytoplasmic	Rv0233 0 0 i	ExpAA=0.62	First60=0.57	PredHel=0	Topology=o	x
Rv0236c	PROBABLE CONSERVED TRANSMEMBRANE PROTEIN	0.869	0.601	22-23	Not cytoplasm	Not extracellular	plasma membrane	Plasma membrane	Extracellular	Rv0236c 13 Y n11-22c30/31o64-84i91-108o120-139i146-163o175-203i215-235o278-302i314-332o401-419i1256-1277o1297	ExpAA=272.58	First60=9.36	PredHel=9	Topology=o64-86i91-113o180-202i209-231o281-303i401-423o1302-1324i1337-1354o1369-1391i			x
Rv0237	PROBABLE CONSERVED LIPOPROTEIN LPQI	1	0.478	35-36	Not cytoplasm	Not extracellular	Not plasma membrane	Cytoplasm	Cytoplasmic	Rv0237 0 Y n7-18c23/24o	ExpAA=3.26	First60=3.24	PredHel=0	Topology=o	x	x
Rv0265c	PROBABLE PERIPLASMIC IRON-TRANSPORT LIPOPROTEIN	0.972	0.694	39-40	Not cytoplasm	Not extracellular	plasma membrane	Cytoplasm	Unknown	Rv0265c 0 0 i	ExpAA=0.06	First60=0.02	PredHel=0	Topology=o	x	x
Rv0278c	PE-PGRS FAMILY PROTEIN	0.997	0.609	33-34	Not cytoplasm	Not extracellular	Not plasma membrane	Extracell	Extracellular	Rv0278c 0 Y n4-15c33/34o	ExpAA=54.11	First60=2.84	PredHel=0	Topology=o
Rv0279c	PE-PGRS FAMILY PROTEIN	0.581	0.31	33-34	Not cytoplasm	Not extracellular	Not plasma membrane	Extracell	Extracellular	Rv0279c 0 0 i	ExpAA=2.33	First60=0.13	PredHel=0	Topology=o			x
Rv0285	PE FAMILY PROTEIN	0.941	0.61	31-32	Not cytoplasm	Not extracellular	Not plasma membrane	Extracell	Unknown	Rv0285 0 0 i	ExpAA=0.25	First60=0.20	PredHel=0	Topology=o
Rv0291	PROBABLE MEMBRANE-ANCHORED MYCOSIN MYCP3 (SERINE PROTEASE) (SUBTILISIN-LIKE PROTEASE) (SUBTILASE-LIKE) (MYCOSIN-3)	1	0.649	25-26	Not cytoplasm	extracellular	Not plasma membrane	Extracell	Extracellular	Rv0291 1 Y n4-15c33/34o431-453i	ExpAA=34.13	First60=10.63	PredHel=1	Topology=o431-453i
Rv0298	HYPOTHETICAL PROTEIN	0.823	0.807	24-25	No Prediction	No Prediction	No Prediction	Cytoplasm	Unknown	Rv0298 0 0 i	ExpAA=0.00	First60=0.00	PredHel=0	Topology=i
Rv0308	PROBABLE CONSERVED INTEGRAL MEMBRANE PROTEIN	0.588	0.47	21-22	Not cytoplasm	Not extracellular	plasma membrane	Plasma membrane	CytoplasmicMembrane	Rv0308 5 Y n6-16c21/22o62-83i90-112o132-152i159-181o187-205i	ExpAA=125.05	First60=20.76	PredHel=6	Topology=i7-26o61-83i90-112o127-149i156-178o188-205i			x
Rv0309	POSSIBLE CONSERVED EXPORTED PROTEIN	1	0.974	27-28	cytoplasm	Not extracellular	plasma membrane	Extracell	Unknown	Rv0309 0 Y n4-22c27/28o	ExpAA=24.31	First60=24.27	PredHel=1	Topology=i7-29o			x
Rv0315	POSSIBLE BETA-1,3-GLUCANASE PRECURSOR	1	0.731	31-32	Not cytoplasm	extracellular	Not plasma membrane	Extracell	Unknown	Rv0315 0 Y n15-26c31/32o	ExpAA=11.80	First60=11.79	PredHel=0	Topology=o	x		x
Rv0320	POSSIBLE CONSERVED EXPORTED PROTEIN	1	0.851	41-42	Not cytoplasm	Not extracellular	plasma membrane	Cytoplasm	Unknown	Rv0320 0 Y n15-30c48/49o	ExpAA=19.97	First60=19.45	PredHel=1	Topology=i13-32o	x
Rv0335c	PE FAMILY PROTEIN	0.64	0.257	43-44	Not cytoplasm	Not extracellular	plasma membrane	Plasma membrane	Unknown	Rv0335c 0 0 i	ExpAA=0.00	First60=0.00	PredHel=0	Topology=o	x
Rv0344c	PROBABLE LIPOPROTEIN LPQJ	0.999	0.281	58-59	cytoplasm	Not extracellular	Not plasma membrane	Extracell	Unknown	Rv0344c 0 Y n11-21c29/30o	ExpAA=2.33	First60=2.20	PredHel=0	Topology=o	x	x	x
Rv0366c	CONSERVED HYPOTHETICAL PROTEIN	0.817	0.809	35-36	Not cytoplasm	Not extracellular	plasma membrane	Cytoplasm	Cytoplasmic	Rv0366c 0 Y n16-27c35/36o	ExpAA=6.87	First60=6.19	PredHel=0	Topology=o
Rv0381c	HYPOTHETICAL PROTEIN	0.96	0.549	24-25	Not cytoplasm	Not extracellular	Not plasma membrane	Extracell	Unknown	Rv0381c 0 Y n4-15c23/24o	ExpAA=3.13	First60=2.77	PredHel=0	Topology=o		x
Rv0398c	POSSIBLE SECRETED PROTEIN	1	0.977	28-29	No Prediction	No Prediction	No Prediction	Extracell	Unknown	Rv0398c 0 Y n7-20c28/29o	ExpAA=19.79	First60=19.76	PredHel=1	Topology=i7-29o			x
Rv0399c	POSSIBLE CONSERVED LIPOPROTEIN LPQK	1	0.57	38-39	Not cytoplasm	extracellular	Not plasma membrane	Cytoplasm	Extracellular	Rv0399c 0 Y n7-18c23/24o	ExpAA=0.54	First60=0.32	PredHel=0	Topology=o		x
Rv0401	PROBABLE CONSERVED TRANSMEMBRANE PROTEIN	1	0.994	29-30	Not cytoplasm	Not extracellular	plasma membrane	Plasma membrane	CytoplasmicMembrane	Rv0401 3 Y n6-17c21/22o31-55i62-82o88-109i	ExpAA=83.85	First60=41.08	PredHel=4	Topology=i7-24o34-56i63-82o87-109i			x
Rv0402c	PROBABLE CONSERVED TRANSMEMBRANE TRANSPORT PROTEIN MMPL1	0.593	0.165	39-40	Not cytoplasm	Not extracellular	plasma membrane	Cytoplasm	CytoplasmicMembrane	Rv0402c 12 0 i20-39o193-212i219-240o252-274i286-309o329-353i374-396o761-780i787-811o823-844i865-886o898-926i	ExpAA=266.14	First60=22.06	PredHel=12	Topology=i17-39o192-211i218-240o250-272i293-315o330-352i373-395o760-782i789-811o821-843i864-886o906-927i	x		x
Rv0403c	PROBABLE CONSERVED MEMBRANE PROTEIN MMPS1	0.974	0.77	33-34	Not cytoplasm	Not extracellular	plasma membrane	Plasma membrane	CytoplasmicMembrane	Rv0403c 0 Y n13-25c33/34o	ExpAA=41.08	First60=21.14	PredHel=2	Topology=i7-29o84-106i			x
Rv0411c	PROBABLE GLUTAMINE-BINDING LIPOPROTEIN GLNH (GLNBP)	0.999	0.399	63-64	Not cytoplasm	Not extracellular	plasma membrane	Cytoplasm	Cytoplasmic	Rv0411c 0 Y n5-15c20/21o	ExpAA=5.75	First60=5.75	PredHel=0	Topology=o
Rv0415	POSSIBLE THIAMINE BIOSYNTHESIS OXIDOREDUCTASE THIO	0.655	0.34	27-28	cytoplasm	Not extracellular	Not plasma membrane	Cytoplasm	Cytoplasmic	Rv0415 0 0 i	ExpAA=3.21	First60=3.20	PredHel=0	Topology=o
Rv0418	PROBABLE LIPOPROTEIN AMINOPEPTIDASE LPQL	0.994	0.714	42-43	Not cytoplasm	extracellular	Not plasma membrane	Cytoplasm	Extracellular	Rv0418 0 Y n10-21c25/26o	ExpAA=18.09	First60=17.96	PredHel=1	Topology=i7-29o		x	x
Rv0419	POSSIBLE LIPOPROTEIN PEPTIDASE LPQM	0.994	0.343	45-46	Not cytoplasm	Not extracellular	plasma membrane	Cytoplasm	Cytoplasmic	Rv0419 1 0 i21-43o	ExpAA=21.64	First60=21.63	PredHel=1	Topology=i21-43o
Rv0425c	POSSIBLE METAL CATION TRANSPORTING P-TYPE ATPASE CTPH	0.997	0.372	32-33	Not cytoplasm	Not extracellular	plasma membrane	Plasma membrane	CytoplasmicMembrane	Rv0425c 3 Y n5-16c28/29o884-901i1409-1432o1444-1463i	ExpAA=103.77	First60=6.74	PredHel=3	Topology=o1359-1381i1410-1432o1445-1467i	x
Rv0426c	POSSIBLE TRANSMEMBRANE PROTEIN	0.959	0.192	32-33	Not cytoplasm	Not extracellular	plasma membrane	Extracell	Unknown	Rv0426c 1 0 o60-90i	ExpAA=46.70	First60=23.12	PredHel=2	Topology=i21-43o63-85i	x		x
Rv0431	PUTATIVE TUBERCULIN RELATED PEPTIDE	0.672	0.285	54-55	Not cytoplasm	Not extracellular	Not plasma membrane	Extracell	Unknown	Rv0431 1 0 o20-39i	ExpAA=21.67	First60=21.59	PredHel=1	Topology=o20-42i			x
Rv0432	PROBABLE PERIPLASMIC SUPEROXIDE DISMUTASE [CU-ZN] SODC	1	0.641	32-33	Not cytoplasm	Not extracellular	plasma membrane	Extracell	Unknown	Rv0432 0 Y n11-23c32/33o	ExpAA=15.62	First60=14.76	PredHel=0	Topology=o	x		x
Rv0436c	PROBABLE CDP-DIACYLGLYCEROL--SERINE O-PHOSPHATIDYLTRANSFERASE PSSA (PS SYNTHASE) (PHOSPHATIDYLSERINE SYNTHASE)	0.839	0.425	50-51	Not cytoplasm	Not extracellular	plasma membrane	Plasma membrane	CytoplasmicMembrane	Rv0436c 7 0 i12-36o42-64i76-95o101-119i131-155o167-187i199-230o	ExpAA=122.90	First60=23.73	PredHel=5	Topology=i13-35o99-118i131-153o163-185i205-227o			x
Rv0455c	CONSERVED HYPOTHETICAL PROTEIN	1	0.987	30-31	No Prediction	No Prediction	No Prediction	Cytoplasm	Unknown	Rv0455c 0 Y n10-21c30/31o	ExpAA=16.65	First60=16.62	PredHel=1	Topology=i7-29o	x		x
Rv0460	CONSERVED HYDROPHOBIC PROTEIN	0.804	0.732	21-22	No Prediction	No Prediction	No Prediction	Plasma membrane	CytoplasmicMembrane	Rv0460 2 Y n6-17c21/22o31-48i55-76o	ExpAA=61.01	First60=45.72	PredHel=3	Topology=i2-21o26-48i55-77o			x
Rv0477	POSSIBLE CONSERVED SECRETED PROTEIN	1	0.923	23-24	Not cytoplasm	Not extracellular	Not plasma membrane	Cytoplasm	Unknown	Rv0477 0 Y n4-15c23/24o	ExpAA=2.08	First60=2.07	PredHel=0	Topology=o
Rv0483	PROBABLE CONSERVED LIPOPROTEIN LPRQ	0.723	0.382	48-49	Not cytoplasm	Not extracellular	plasma membrane	Extracell	Unknown	Rv0483 0 0 i	ExpAA=0.90	First60=0.89	PredHel=0	Topology=o			x
Rv0484c	PROBABLE SHORT-CHAIN TYPE OXIDOREDUCTASE	0.876	0.427	25-26	Not cytoplasm	Not extracellular	Not plasma membrane	Plasma membrane	Cytoplasmic	Rv0484c 0 0 i	ExpAA=1.73	First60=0.07	PredHel=0	Topology=o
Rv0490	PUTATIVE TWO COMPONENT SENSOR HISTIDINE KINASE SENX3	0.991	0.653	22-23	Not cytoplasm	Not extracellular	plasma membrane	Plasma membrane	CytoplasmicMembrane	Rv0490 0 Y n3-14c19/20o	ExpAA=26.98	First60=25.50	PredHel=1	Topology=i7-29o
Rv0507	PROBABLE CONSERVED TRANSMEMBRANE TRANSPORT PROTEIN MMPL2	0.943	0.32	50-51	Not cytoplasm	Not extracellular	plasma membrane	Plasma membrane	CytoplasmicMembrane	Rv0507 12 0 i21-41o194-213i220-239o251-272i293-317o329-354i375-397o765-783i790-812o818-841i862-885o891-910i	ExpAA=257.33	First60=21.45	PredHel=11	Topology=o22-41i211-233o248-270i290-312o332-354i375-397o761-783i790-812o822-844i864-886o891-913i			x
Rv0511	PROBABLE UROPORPHYRIN-III C-METHYLTRANSFERASE HEMD	0.675	0.289	36-37	cytoplasm	Not extracellular	Not plasma membrane	Cytoplasm	Cytoplasmic	Rv0511 0 0 i	ExpAA=0.37	First60=0.34	PredHel=0	Topology=o	x
Rv0514	POSSIBLE TRANSMEMBRANE PROTEIN	0.826	0.232	24-25	No Prediction	No Prediction	No Prediction	Plasma membrane	Unknown	Rv0514 1 Y n11-22c30/31o54-73i	ExpAA=40.22	First60=28.70	PredHel=2	Topology=i7-26o48-70i	x		x
Rv0519c	POSSIBLE CONSERVED MEMBRANE PROTEIN	0.606	0.529	55-56	cytoplasm	Not extracellular	Not plasma membrane	Extracell	CytoplasmicMembrane	Rv0519c 0 0 i	ExpAA=33.27	First60=21.10	PredHel=1	Topology=i26-48o	x
Rv0526	POSSIBLE THIOREDOXIN PROTEIN (THIOL-DISULFIDE INTERCHANGE PROTEIN)	1	0.991	38-39	Not cytoplasm	Not extracellular	plasma membrane	Cytoplasm	Unknown	Rv0526 0 Y n17-28c33/34o	ExpAA=10.76	First60=10.60	PredHel=0	Topology=o	x	x
Rv0527	POSSIBLE CYTOCHROME C-TYPE BIOGENESIS PROTEIN CCDA	0.998	0.996	29-30	Not cytoplasm	Not extracellular	plasma membrane	Plasma membrane	CytoplasmicMembrane	Rv0527 5 Y n7-25c29/30o69-92i104-126o146-170i182-207o219-240i	ExpAA=151.90	First60=36.66	PredHel=7	Topology=i7-29o33-50i71-93o108-127i147-169o184-206i219-241o			x
Rv0528	PROBABLE CONSERVED TRANSMEMBRANE PROTEIN	1	0.855	35-36	Not cytoplasm	Not extracellular	Not plasma membrane	Cytoplasm	CytoplasmicMembrane	Rv0528 3 Y n10-21c29/30o64-83i158-177o444-463i	ExpAA=86.03	First60=22.15	PredHel=4	Topology=i5-27o61-83i157-179o441-463i			x
Rv0529	POSSIBLE CYTOCHROME C-TYPE BIOGENESIS PROTEIN CCSA	0.801	0.235	53-54	Not cytoplasm	Not extracellular	Not plasma membrane	Plasma membrane	CytoplasmicMembrane	Rv0529 8 0 o16-34i80-101o113-130i137-158o170-198i228-251o263-281i293-321o	ExpAA=172.71	First60=21.37	PredHel=8	Topology=o15-34i80-102o107-129i136-158o173-195i227-249o269-286i293-315o			x
Rv0532	PE-PGRS FAMILY PROTEIN	0.995	0.465	30-31	Not cytoplasm	Not extracellular	plasma membrane	Extracell	Extracellular	Rv0532 0 Y n4-15c33/34o	ExpAA=2.38	First60=2.14	PredHel=0	Topology=o			x
Rv0541c	PROBABLE CONSERVED INTEGRAL MEMBRANE PROTEIN	0.971	0.78	48-49	Not cytoplasm	Not extracellular	plasma membrane	Plasma membrane	CytoplasmicMembrane	Rv0541c 11 0 i7-24o59-81i88-107o181-204i216-249o269-291i303-322o342-369i381-400o406-422i429-447o	ExpAA=228.26	First60=23.02	PredHel=10	Topology=i7-29o59-81i88-110o181-203i224-246o266-288i300-322o347-369i382-399o429-446i			x
Rv0544c	POSSIBLE CONSERVED TRANSMEMBRANE PROTEIN	0.998	0.988	36-37	Not cytoplasm	Not extracellular	plasma membrane	Plasma membrane	CytoplasmicMembrane	Rv0544c 1 Y n13-24c29/30o53-74i	ExpAA=44.41	First60=31.12	PredHel=2	Topology=i13-32o52-74i			x
Rv0545c	PROBABLE LOW-AFFINITY INORGANIC PHOSPHATE TRANSPORTER INTEGRAL MEMBRANE PROTEIN PITA	0.979	0.304	30-31	Not cytoplasm	Not extracellular	plasma membrane	Plasma membrane	CytoplasmicMembrane	Rv0545c 7 Y n3-13c17/18o41-65i77-99o105-123i135-158o219-238i308-329o335-354i	ExpAA=193.23	First60=36.50	PredHel=8	Topology=i5-24o44-66i79-101o106-128i135-157o216-238i308-327o332-354i			x
Rv0559c	POSSIBLE CONSERVED SECRETED PROTEIN	1	0.998	25-26	No Prediction	No Prediction	No Prediction	Extracell	Unknown	Rv0559c 0 Y n6-17c25/26o	ExpAA=8.05	First60=8.01	PredHel=0	Topology=o
Rv0563	PROBABLE PROTEASE TRANSMEMBRANE PROTEIN HEAT SHOCK PROTEIN HTPX	0.986	0.419	31-32	Not cytoplasm	Not extracellular	plasma membrane	Plasma membrane	CytoplasmicMembrane	Rv0563 4 0 i12-29o35-51i145-169o181-201i	ExpAA=80.65	First60=36.99	PredHel=4	Topology=i13-30o34-51i145-167o182-201i			x
Rv0583c	PROBABLE CONSERVED LIPOPROTEIN LPQN	1	0.722	54-55	Not cytoplasm	Not extracellular	plasma membrane	Extracell	Unknown	Rv0583c 0 Y n4-13c18/19o	ExpAA=5.86	First60=5.80	PredHel=0	Topology=o		x	x
Rv0584	POSSIBLE CONSERVED EXPORTED PROTEIN	1	0.685	30-31	cytoplasm	Not extracellular	Not plasma membrane	Extracell	Extracellular	Rv0584 0 Y n10-21c26/27o	ExpAA=22.41	First60=22.15	PredHel=1	Topology=i9-31o			x
Rv0590	MCE-FAMILY RELATED PROTEIN	0.966	0.953	29-30	Not cytoplasm	Not extracellular	Not plasma membrane	Cytoplasm	Unknown	Rv0590 1 0 i12-31o	ExpAA=21.54	First60=21.44	PredHel=1	Topology=i12-34o
Rv0591	MCE-FAMILY PROTEIN MCE2C	0.998	0.587	38-39	Not cytoplasm	Not extracellular	plasma membrane	Extracell	Unknown	Rv0591 0 Y n16-24c29/30o	ExpAA=21.53	First60=21.50	PredHel=1	Topology=i12-34o			x
Rv0592	MCE-FAMILY PROTEIN MCE2D	0.999	0.613	35-36	cytoplasm	Not extracellular	Not plasma membrane	Extracell	Unknown	Rv0592 0 Y n19-29c34/35o	ExpAA=21.17	First60=21.08	PredHel=1	Topology=i19-41o			x
Rv0598c	CONSERVED HYPOTHETICAL PROTEIN WITH PIN DOMAIN	0.881	0.881	24-25	Not cytoplasm	Not extracellular	Not plasma membrane	Plasma membrane	Unknown	Rv0598c 0 Y n5-16c24/25o	ExpAA=0.49	First60=0.36	PredHel=0	Topology=o
Rv0603	POSSIBLE EXPORTED PROTEIN	1	0.717	28-29	Not cytoplasm	Not extracellular	plasma membrane	Cytoplasm	Unknown	Rv0603 0 Y n4-16c28/29o	ExpAA=22.68	First60=22.68	PredHel=1	Topology=i7-29o			x
Rv0604	PROBABLE CONSERVED LIPOPROTEIN LPQO	1	0.649	26-27	Not cytoplasm	Not extracellular	plasma membrane	Plasma membrane	Unknown	Rv0604 0 Y n10-20c24/25o	ExpAA=2.40	First60=0.82	PredHel=0	Topology=o	x	x
Rv0625c	PROBABLE CONSERVED TRANSMEMBRANE PROTEIN	0.778	0.171	46-47	Not cytoplasm	Not extracellular	plasma membrane	Plasma membrane	CytoplasmicMembrane	Rv0625c 5 0 o20-44i56-77o83-107i153-176o196-216i	ExpAA=111.11	First60=28.63	PredHel=5	Topology=o15-34i54-76o86-108i152-174o194-216i			x
Rv0671	POSSIBLE CONSERVED LIPOPROTEIN LPQP	1	0.587	25-26	Not cytoplasm	extracellular	Not plasma membrane	Cytoplasm	Extracellular	Rv0671 0 Y n5-16c25/26o	ExpAA=34.72	First60=23.31	PredHel=1	Topology=i5-27o		x
Rv0674	CONSERVED HYPOTHETICAL PROTEIN	0.598	0.463	22-23	cytoplasm	Not extracellular	Not plasma membrane	Cytoplasm	Unknown	Rv0674 0 Y n9-17c22/23o	ExpAA=0.92	First60=0.88	PredHel=0	Topology=o
Rv0677c	POSSIBLE CONSERVED MEMBRANE PROTEIN MMPS5	0.921	0.819	45-46	Not cytoplasm	Not extracellular	plasma membrane	Cytoplasm	Unknown	Rv0677c 0 Y n12-23c27/28o	ExpAA=19.67	First60=19.66	PredHel=1	Topology=i7-26o			x
Rv0679c	CONSERVED HYPOTHETICAL THREONINE RICH PROTEIN	1	0.536	49-50	Not cytoplasm	extracellular	plasma membrane	Extracell	Extracellular	Rv0679c 0 Y n16-28c33/34o	ExpAA=6.07	First60=6.05	PredHel=0	Topology=o	x	x	x
Rv0680c	PROBABLE CONSERVED TRANSMEMBRANE PROTEIN	1	0.991	30-31	Not cytoplasm	Not extracellular	plasma membrane	Cytoplasm	Unknown	Rv0680c 0 Y n6-17c22/23o	ExpAA=33.67	First60=21.14	PredHel=2	Topology=i7-29o60-82i			x
Rv0732	PROBABLE PREPROTEIN TRANSLOCASE SECY	0.635	0.597	53-54	Not cytoplasm	Not extracellular	plasma membrane	Plasma membrane	CytoplasmicMembrane	Rv0732 9 Y n18-27c32/33o74-98i118-137o157-178i185-204o216-235i263-284o318-340i372-394o406-424i	ExpAA=211.24	First60=16.65	PredHel=9	Topology=o76-98i119-141o156-178i185-204o214-236i270-292o318-340i372-394o399-421i			x
Rv0734	PROBABLE METHIONINE AMINOPEPTIDASE MAPA (MAP) (PEPTIDASE M) (MetAP)	1	0.987	42-43	cytoplasm	Not extracellular	Not plasma membrane	Cytoplasm	Cytoplasmic	Rv0734 0 Y n25-35c40/41o	ExpAA=0.60	First60=0.40	PredHel=0	Topology=o	x
Rv0742	PE-PGRS FAMILY PROTEIN	0.991	0.604	33-34	Not cytoplasm	Not extracellular	plasma membrane	Extracell	Unknown	Rv0742 0 0 i	ExpAA=3.31	First60=2.63	PredHel=0	Topology=o
Rv0746	PE-PGRS FAMILY PROTEIN	0.999	0.799	33-34	Not cytoplasm	Not extracellular	Not plasma membrane	Extracell	Extracellular	Rv0746 0 Y n10-21c33/34o	ExpAA=97.90	First60=2.70	PredHel=0	Topology=o			x
Rv0747	PE-PGRS FAMILY PROTEIN	0.988	0.44	32-33	Not cytoplasm	Not extracellular	Not plasma membrane	Extracell	Extracellular	Rv0747 0 Y n10-21c30/31o	ExpAA=14.75	First60=1.12	PredHel=0	Topology=o			x
Rv0754	PE-PGRS FAMILY PROTEIN	0.79	0.194	41-42	Not cytoplasm	Not extracellular	plasma membrane	Extracell	CytoplasmicMembrane	Rv0754 0 0 i	ExpAA=5.76	First60=0.15	PredHel=0	Topology=o
Rv0758	POSSIBLE TWO COMPONENT SYSTEM RESPONSE SENSOR KINASE MEMBRANE ASSOCIATED PHOR	1	0.735	31-32	Not cytoplasm	Not extracellular	plasma membrane	Cytoplasm	CytoplasmicMembrane	Rv0758 1 Y n15-27c31/32o158-180i	ExpAA=42.02	First60=22.33	PredHel=2	Topology=o15-37i158-180o
Rv0765c	PROBABLE OXIDOREDUCTASE	0.756	0.283	24-25	cytoplasm	Not extracellular	Not plasma membrane	Cytoplasm	Cytoplasmic	Rv0765c 0 0 i	ExpAA=1.37	First60=1.36	PredHel=0	Topology=o
Rv0774c	PROBABLE CONSERVED EXPORTED PROTEIN	0.987	0.71	50-51	cytoplasm	Not extracellular	plasma membrane	Extracell	CytoplasmicMembrane	Rv0774c 0 Y n21-31c38/39o	ExpAA=22.38	First60=20.81	PredHel=1	Topology=i21-43o
Rv0799c	CONSERVED HYPOTHETICAL PROTEIN	0.541	0.373	30-31	Not cytoplasm	extracellular	Not plasma membrane	Cytoplasm	Unknown	Rv0799c 0 0 i	ExpAA=1.05	First60=1.03	PredHel=0	Topology=o
Rv0804	CONSERVED HYPOTHETICAL PROTEIN	0.83	0.353	25-26	Not cytoplasm	Not extracellular	plasma membrane	Plasma membrane	CytoplasmicMembrane	Rv0804 3 Y n6-16c21/22o31-50i154-172o178-199i	ExpAA=68.57	First60=13.82	PredHel=0	Topology=o
Rv0817c	PROBABLE CONSERVED EXPORTED PROTEIN	1	0.952	27-28	No Prediction	No Prediction	No Prediction	Plasma membrane	Cytoplasmic	Rv0817c 0 Y n6-21c26/27o	ExpAA=22.39	First60=22.38	PredHel=1	Topology=i7-29o
Rv0830	CONSERVED HYPOTHETICAL PROTEIN	0.944	0.928	29-30	Not cytoplasm	Not extracellular	plasma membrane	Cytoplasm	Cytoplasmic	Rv0830 0 Y n11-22c29/30o	ExpAA=0.78	First60=0.25	PredHel=0	Topology=o	x
Rv0832	PE-PGRS FAMILY PROTEIN	0.993	0.766	41-42	Not cytoplasm	Not extracellular	plasma membrane	Extracell	Unknown	Rv0832 0 Y n4-15c33/34o	ExpAA=0.72	First60=0.49	PredHel=0	Topology=o
Rv0835	POSSIBLE LIPOPROTEIN LPQQ	0.994	0.597	35-36	Not cytoplasm	Not extracellular	plasma membrane	Cytoplasm	Cytoplasmic	Rv0835 0 Y n10-21c26/27o	ExpAA=3.90	First60=3.56	PredHel=0	Topology=o		x
Rv0838	PROBABLE CONSERVED LIPOPROTEIN LPQR	0.996	0.395	63-64	cytoplasm	Not extracellular	Not plasma membrane	Cytoplasm	Cytoplasmic	Rv0838 0 Y n12-23c28/29o	ExpAA=1.35	First60=1.34	PredHel=0	Topology=o		x
Rv0846c	PROBABLE OXIDASE	1	0.466	44-45	Not cytoplasm	Not extracellular	Not plasma membrane	Extracell	Unknown	Rv0846c 0 Y n21-32c37/38o	ExpAA=14.31	First60=14.20	PredHel=0	Topology=o	x	x
Rv0847	PROBABLE LIPOPROTEIN LPQS	0.993	0.687	23-24	cytoplasm	Not extracellular	plasma membrane	Plasma membrane	Unknown	Rv0847 0 Y n7-18c23/24o	ExpAA=22.47	First60=22.32	PredHel=1	Topology=i7-29o			x
Rv0867c	POSSIBLE RESUSCITATION-PROMOTING FACTOR RPFA	1	0.896	38-39	Not cytoplasm	extracellular	Not plasma membrane	Extracell	Cellwall	Rv0867c 0 Y n18-26c38/39o	ExpAA=19.35	First60=19.34	PredHel=1	Topology=i13-35o	x		x
Rv0870c	POSSIBLE CONSERVED INTEGRAL MEMBRANE PROTEIN	0.9	0.586	40-41	Not cytoplasm	Not extracellular	plasma membrane	Plasma membrane	CytoplasmicMembrane	Rv0870c 4 0 i7-24o30-50i62-83o89-109i	ExpAA=81.88	First60=39.93	PredHel=3	Topology=i7-41o61-83i90-112o			x
Rv0875c	POSSIBLE CONSERVED EXPORTED PROTEIN	0.999	0.549	24-25	Not cytoplasm	Not extracellular	Not plasma membrane	Cytoplasm	Unknown	Rv0875c 0 Y n5-16c21/22o	ExpAA=22.41	First60=22.40	PredHel=1	Topology=i5-27o			x
Rv0888	PROBABLE EXPORTED PROTEIN	0.998	0.569	31-32	Not cytoplasm	Not extracellular	plasma membrane	Extracell	Unknown	Rv0888 0 Y n10-23c31/32o	ExpAA=21.65	First60=20.86	PredHel=1	Topology=i7-29o			x
Rv0892	PROBABLE MONOOXYGENASE	0.985	0.466	26-27	Not cytoplasm	Not extracellular	Not plasma membrane	Cytoplasm	CytoplasmicMembrane	Rv0892 0 Y n5-13c21/22o	ExpAA=23.61	First60=21.94	PredHel=1	Topology=i7-29o
Rv0906	CONSERVED HYPOTHETICAL PROTEIN	0.999	0.514	36-37	Not cytoplasm	Not extracellular	plasma membrane	Cytoplasm	Unknown	Rv0906 0 Y n8-21c33/34o	ExpAA=2.20	First60=2.19	PredHel=0	Topology=o	x
Rv0912	PROBABLE CONSERVED TRANSMEMBRANE PROTEIN	0.992	0.47	33-34	Not cytoplasm	Not extracellular	plasma membrane	Plasma membrane	CytoplasmicMembrane	Rv0912 3 Y n10-21c39/40o55-74i81-101o113-134i	ExpAA=87.16	First60=29.97	PredHel=4	Topology=i7-29o49-71i78-100o115-137i			x
Rv0928	PERIPLASMIC PHOSPHATE-BINDING LIPOPROTEIN PSTS3 (PBP-3) (PSTS3) (PHOS1)	1	0.338	41-42	Not cytoplasm	Not extracellular	plasma membrane	Extracell	Unknown	Rv0928 0 Y n6-16c21/22o	ExpAA=1.54	First60=1.41	PredHel=0	Topology=o		x	x
Rv0932c	PERIPLASMIC PHOSPHATE-BINDING LIPOPROTEIN PSTS2 (PBP-2) (PSTS2)	1	0.468	33-34	Not cytoplasm	Not extracellular	plasma membrane	Extracell	Unknown	Rv0932c 0 Y n8-20c24/25o	ExpAA=7.77	First60=7.76	PredHel=0	Topology=o	x	x	x
Rv0934	PERIPLASMIC PHOSPHATE-BINDING LIPOPROTEIN PSTS1 (PBP-1) (PSTS1)	1	0.317	39-40	Not cytoplasm	Not extracellular	plasma membrane	Extracell	Unknown	Rv0934 0 Y n5-15c20/21o	ExpAA=4.99	First60=4.93	PredHel=0	Topology=o		x	x
Rv0937c	CONSERVED HYPOTHETICAL PROTEIN	0.601	0.598	22-23	Not cytoplasm	Not extracellular	Not plasma membrane	Cytoplasm	Cytoplasmic	Rv0937c 0 Y n3-14c22/23o	ExpAA=0.62	First60=0.62	PredHel=0	Topology=o
Rv0942	HYPOTHETICAL PROTEIN	0.856	0.801	49-50	No Prediction	No Prediction	No Prediction	Extracell	Unknown	Rv0942 0 Y n24-31c49/50o	ExpAA=0.07	First60=0.07	PredHel=0	Topology=o	x
Rv0945	PROBABLE SHORT-CHAIN TYPE DEHYDROGENASE/REDUCTASE	0.992	0.968	28-29	Not cytoplasm	Not extracellular	Not plasma membrane	Cytoplasm	Cytoplasmic	Rv0945 0 Y n10-21c28/29o	ExpAA=1.01	First60=0.65	PredHel=0	Topology=o	x
Rv0962c	POSSIBLE LIPOPROTEIN LPRP	0.995	0.66	32-33	Not cytoplasm	Not extracellular	plasma membrane	Extracell	Unknown	Rv0962c 0 Y n7-18c22/23o	ExpAA=5.32	First60=5.32	PredHel=0	Topology=o		x	x
Rv0977	PE-PGRS FAMILY PROTEIN	0.945	0.742	32-33	Not cytoplasm	Not extracellular	Not plasma membrane	Extracell	Extracellular	Rv0977 0 Y n3-14c32/33o	ExpAA=0.51	First60=0.14	PredHel=0	Topology=o			x
Rv0978c	PE-PGRS FAMILY PROTEIN	0.849	0.796	33-34	Not cytoplasm	Not extracellular	plasma membrane	Extracell	Extracellular	Rv0978c 0 0 i	ExpAA=1.36	First60=0.02	PredHel=0	Topology=o			x
Rv0980c	PE-PGRS FAMILY PROTEIN	0.849	0.799	33-34	Not cytoplasm	Not extracellular	plasma membrane	Extracell	Extracellular	Rv0980c 0 0 i	ExpAA=0.19	First60=0.02	PredHel=0	Topology=o			x
Rv0982	PROBABLE TWO COMPONENT SENSOR KINASE MPRB	1	0.495	45-46	Not cytoplasm	Not extracellular	plasma membrane	Plasma membrane	CytoplasmicMembrane	Rv0982 2 0 i20-47o164-184i	ExpAA=45.76	First60=23.08	PredHel=2	Topology=o25-47i162-184o
Rv0988	POSSIBLE CONSERVED EXPORTED PROTEIN	0.997	0.823	33-34	cytoplasm	Not extracellular	Not plasma membrane	Extracell	Unknown	Rv0988 0 Y n4-15c19/20o	ExpAA=19.14	First60=19.10	PredHel=1	Topology=i5-23o			x
Rv0999	HYPOTHETICAL PROTEIN	0.551	0.286	59-60	No Prediction	No Prediction	No Prediction	Cytoplasm	Unknown	Rv0999 0 0 i	ExpAA=0.50	First60=0.47	PredHel=0	Topology=o
Rv1003	CONSERVED HYPOTHETICAL PROTEIN	0.565	0.168	34-35	cytoplasm	extracellular	Not plasma membrane	Plasma membrane	Cytoplasmic	Rv1003 0 Y n6-14c26/27o	ExpAA=0.18	First60=0.00	PredHel=0	Topology=o
Rv1004c	PROBABLE MEMBRANE PROTEIN	0.99	0.492	45-46	Not cytoplasm	Not extracellular	plasma membrane	Extracell	CytoplasmicMembrane	Rv1004c 0 Y n15-26c31/32o	ExpAA=120.87	First60=22.50	PredHel=1	Topology=i12-34o
Rv1006	HYPOTHETICAL PROTEIN	1	0.641	31-32	Not cytoplasm	Not extracellular	plasma membrane	Extracell	Unknown	Rv1006 0 Y n10-21c26/27o	ExpAA=3.88	First60=3.88	PredHel=0	Topology=o	x	x	x
Rv1009	PROBABLE RESUSCITATION-PROMOTING FACTOR rpfB	0.984	0.592	23-24	Not cytoplasm	Not extracellular	plasma membrane	Cytoplasm	Unknown	Rv1009 0 Y n4-15c22/23o	ExpAA=20.67	First60=20.62	PredHel=1	Topology=i7-29o
Rv1016c	PROBABLE CONSERVED LIPOPROTEIN LPQT	0.999	0.756	49-50	Not cytoplasm	Not extracellular	plasma membrane	Extracell	Unknown	Rv1016c 0 Y n14-25c30/31o	ExpAA=10.59	First60=10.59	PredHel=0	Topology=o
Rv1022	PROBABLE CONSERVED LIPOPROTEIN LPQU	1	0.688	51-52	cytoplasm	Not extracellular	Not plasma membrane	Cytoplasm	Unknown	Rv1022 0 Y n9-20c25/26o	ExpAA=19.27	First60=18.41	PredHel=1	Topology=i7-29o		x
Rv1029	Probable Potassium-transporting ATPase A chain KDPA	0.68	0.582	32-33	Not cytoplasm	Not extracellular	plasma membrane	Plasma membrane	CytoplasmicMembrane	Rv1029 10 0 o6-28i67-86o138-157i178-200o262-279i286-306o390-410i431-455o497-517i538-565o	ExpAA=222.49	First60=22.63	PredHel=10	Topology=o5-27i64-86o135-157i178-200o262-279i286-308o386-408i428-450o497-519i539-561o			x
Rv1031	PROBABLE POTASSIUM-TRANSPORTING ATPase C chain KDPC (Potassium-translocating ATPase C chain) (ATP phosphohydrolase [potassium-transporting] C chain)	0.981	0.52	41-42	Not cytoplasm	Not extracellular	plasma membrane	Plasma membrane	Unknown	Rv1031 0 Y n5-15c20/21o	ExpAA=22.91	First60=22.89	PredHel=1	Topology=i5-27o
Rv1032c	TWO COMPONENT SENSOR HISTIDINE KINASE TRCS	0.995	0.403	49-50	Not cytoplasm	Not extracellular	plasma membrane	Cytoplasm	CytoplasmicMembrane	Rv1032c 2 0 i24-45o188-210i	ExpAA=52.78	First60=22.86	PredHel=2	Topology=o25-47i188-210o
Rv1040c	PE FAMILY PROTEIN	0.999	0.62	33-34	Not cytoplasm	Not extracellular	plasma membrane	Extracell	CytoplasmicMembrane	Rv1040c 0 Y n11-21c33/34o	ExpAA=0.52	First60=0.21	PredHel=0	Topology=o
Rv1050	PROBABLE OXIDOREDUCTASE	0.933	0.481	29-30	Not cytoplasm	Not extracellular	Not plasma membrane	Cytoplasm	Cytoplasmic	Rv1050 0 0 i	ExpAA=0.54	First60=0.01	PredHel=0	Topology=o
Rv1062	CONSERVED HYPOTHETICAL PROTEIN	0.86	0.779	28-29	Not cytoplasm	Not extracellular	plasma membrane	Plasma membrane	Cytoplasmic	Rv1062 0 Y n6-17c25/26o	ExpAA=9.07	First60=8.79	PredHel=0	Topology=o
Rv1064	POSSIBLE LIPOPROTEIN LPQV	1	0.29	25-26	Not cytoplasm	Not extracellular	plasma membrane	Extracell	Unknown	Rv1064c 0 Y n9-20c25/26o	ExpAA=17.31	First60=17.17	PredHel=0	Topology=o
Rv1067c	PE-PGRS FAMILY PROTEIN	0.996	0.412	40-41	Not cytoplasm	Not extracellular	plasma membrane	Extracell	Extracellular	Rv1067c 0 Y n3-14c32/33o	ExpAA=0.79	First60=0.71	PredHel=0	Topology=o			x
Rv1068	PE-PGRS FAMILY PROTEIN	0.913	0.613	33-34	Not cytoplasm	Not extracellular	plasma membrane	Extracell	Extracellular	Rv1068c 0 0 i	ExpAA=0.05	First60=0.00	PredHel=0	Topology=o
Rv1075c	CONSERVED EXPORTED PROTEIN	0.989	0.576	36-37	cytoplasm	Not extracellular	Not plasma membrane	Plasma membrane	CytoplasmicMembrane	Rv1075c 0 Y n6-16c21/22o	ExpAA=9.05	First60=7.96	PredHel=0	Topology=o	x
Rv1081c	PROBABLE CONSERVED MEMBRANE PROTEIN	0.993	0.286	42-43	Not cytoplasm	Not extracellular	Not plasma membrane	Cytoplasm	Unknown	Rv1081c 1 0 i26-46o	ExpAA=21.47	First60=21.46	PredHel=1	Topology=i27-49o
Rv1087	PE-PGRS FAMILY PROTEIN	0.883	0.479	41-42	Not cytoplasm	Not extracellular	Not plasma membrane	Extracell	Extracellular	Rv1087 0 Y n3-14c26/27o	ExpAA=1.06	First60=0.22	PredHel=0	Topology=o			x
Rv1088	PE FAMILY PROTEIN	0.824	0.551	30-31	Not cytoplasm	Not extracellular	plasma membrane	Plasma membrane	Cytoplasmic	Rv1088 0 Y n5-16c34/35o	ExpAA=29.02	First60=16.23	PredHel=0	Topology=o
Rv1091	PE-PGRS FAMILY PROTEIN	0.728	0.267	30-31	Not cytoplasm	Not extracellular	Not plasma membrane	Extracell	Extracellular	Rv1091 0 Y n3-14c26/27o	ExpAA=0.28	First60=0.24	PredHel=0	Topology=o			x
Rv1096	POSSIBLE GLYCOSYL HYDROLASE	0.745	0.733	38-39	Not cytoplasm	Not extracellular	Not plasma membrane	Extracell	Unknown	Rv1096 1 0 i12-33o	ExpAA=20.68	First60=20.61	PredHel=1	Topology=i12-31o			x
Rv1101c	CONSERVED MEMBRANE PROTEIN	0.708	0.585	38-39	Not cytoplasm	Not extracellular	plasma membrane	Plasma membrane	CytoplasmicMembrane	Rv1101c 8 0 i12-28o34-52i64-89o156-179i214-235o241-263i270-290o310-340i	ExpAA=174.46	First60=38.34	PredHel=8	Topology=i12-27o31-53i66-88o157-179i214-236o241-263i270-292o317-339i			x
Rv1115	POSSIBLE EXPORTED PROTEIN	0.959	0.388	46-47	Not cytoplasm	extracellular	Not plasma membrane	Extracell	Unknown	Rv1115 1 0 i9-30o	ExpAA=23.23	First60=22.47	PredHel=1	Topology=i9-31o			x
Rv1123c	POSSIBLE PEROXIDASE BPOB (NON-HAEM PEROXIDASE)	0.749	0.483	26-27	cytoplasm	Not extracellular	Not plasma membrane	Cytoplasm	CytoplasmicMembrane	Rv1123c 0 0 i	ExpAA=0.03	First60=0.01	PredHel=0	Topology=o
Rv1135c	PPE FAMILY PROTEIN	0.969	0.311	53-54	Not cytoplasm	Not extracellular	plasma membrane	Extracell	Extracellular	Rv1135c 0 0 i	ExpAA=0.97	First60=0.81	PredHel=0	Topology=o			x
Rv1145	PROBABLE CONSERVED TRANSMEMBRANE TRANSPORT PROTEIN MMPL13A	0.996	0.504	37-38	Not cytoplasm	Not extracellular	plasma membrane	Plasma membrane	CytoplasmicMembrane	Rv1145 3 Y n16-26c31/32o178-203i210-227o233-254i	ExpAA=82.16	First60=21.09	PredHel=4	Topology=i16-35o183-205i210-227o232-254i			x
Rv1146	PROBABLE CONSERVED TRANSMEMBRANE TRANSPORT PROTEIN MMPL13B	0.556	0.555	28-29	Not cytoplasm	Not extracellular	plasma membrane	Plasma membrane	CytoplasmicMembrane	Rv1146 7 0 o6-26i65-84o234-256i261-279o299-319i360-380o386-405i	ExpAA=144.10	First60=21.43	PredHel=6	Topology=o4-26i64-86o234-256i261-280o295-317i360-382o			x
Rv1157c	CONSERVED HYPOTHETICAL ALA-, PRO-RICH PROTEIN	0.999	0.552	64-65	Not cytoplasm	extracellular	Not plasma membrane	Extracell	Unknown	Rv1157c 0 Y n24-39c44/45o	ExpAA=10.00	First60=9.92	PredHel=0	Topology=o			x
Rv1158c	CONSERVED HYPOTHETICAL ALA-, PRO-RICH PROTEIN	1	0.547	29-30	Not cytoplasm	extracellular	Not plasma membrane	Extracell	Unknown	Rv1158c 0 Y n10-21c29/30o	ExpAA=15.43	First60=15.29	PredHel=1	Topology=i7-29o			x
Rv1166	PROBABLE CONSERVED LIPOPROTEIN LPQW	1	0.307	38-39	Not cytoplasm	Not extracellular	plasma membrane	Extracell	Unknown	Rv1166 0 Y n10-21c26/27o	ExpAA=13.09	First60=13.07	PredHel=0	Topology=o		x
Rv1171	CONSERVED HYPOTHETICAL PROTEIN	0.618	0.426	48-49	Not cytoplasm	Not extracellular	plasma membrane	Plasma membrane	CytoplasmicMembrane	Rv1171 3 Y n2-9c15/16o31-50i57-77o89-110i	ExpAA=83.92	First60=44.12	PredHel=4	Topology=i2-24o28-50i57-79o89-111i			x
Rv1172	PE FAMILY PROTEIN	0.94	0.426	32-33	Not cytoplasm	Not extracellular	plasma membrane	Extracell	Unknown	Rv1172c 0 Y n3-14c32/33o	ExpAA=17.50	First60=2.83	PredHel=0	Topology=o
Rv1173		0.595	0.579	23-24	cytoplasm	Not extracellular	Not plasma membrane	Cytoplasm	Cytoplasmic	Rv1173 0 0 i	ExpAA=0.00	First60=0.00	PredHel=0	Topology=o
Rv1174c	LOW MOLECULAR WEIGHT T-CELL ANTIGEN TB8.4	1	0.981	28-29	Not cytoplasm	Not extracellular	plasma membrane	Extracell	Unknown	Rv1174c 0 Y n5-16c28/29o	ExpAA=14.10	First60=13.67	PredHel=0	Topology=o
Rv1184c	POSSIBLE EXPORTED PROTEIN	1	0.409	26-27	Not cytoplasm	Not extracellular	plasma membrane	Extracell	Unknown	Rv1184c 0 Y n4-17c25/26o	ExpAA=20.72	First60=20.56	PredHel=1	Topology=i5-27o	x		x
Rv1195	PE FAMILY PROTEIN	0.891	0.593	33-34	Not cytoplasm	Not extracellular	plasma membrane	Extracell	Extracellular	Rv1195 0 0 i	ExpAA=0.13	First60=0.07	PredHel=0	Topology=o
Rv1209	CONSERVED HYPOTHETICAL PROTEIN	0.998	0.428	48-49	cytoplasm	Not extracellular	Not plasma membrane	Cytoplasm	Unknown	Rv1209 1 0 o6-27i	ExpAA=22.70	First60=22.70	PredHel=1	Topology=i5-27o
Rv1214c	PE FAMILY PROTEIN	1	0.92	24-25	Not cytoplasm	Not extracellular	plasma membrane	Extracell	Unknown	Rv1214c 0 Y n2-12c24/25o	ExpAA=2.56	First60=2.09	PredHel=0	Topology=o
Rv1216c	PROBABLE F420 BIOSYNTHESIS PROTEIN FBIC	0.634	0.528	28-29	Not cytoplasm	Not extracellular	plasma membrane	Plasma membrane	CytoplasmicMembrane	Rv1216c 5 0 i7-26o32-53i74-93o105-129i176-195o	ExpAA=109.56	First60=43.34	PredHel=5	Topology=i7-29o34-53i74-92o107-129i160-182o			x
Rv1228	PROBABLE LIPOPROTEIN LPQX	0.772	0.537	21-22	Not cytoplasm	extracellular	Not plasma membrane	Extracell	Unknown	Rv1228 0 Y n7-15c20/21o	ExpAA=0.47	First60=0.37	PredHel=0	Topology=o		x
Rv1230	POSSIBLE MEMBRANE PROTEIN	0.973	0.686	59-60	Not cytoplasm	Not extracellular	Not plasma membrane	Extracell	CytoplasmicMembrane	Rv1230c 2 0 i26-47o59-80i	ExpAA=49.61	First60=23.54	PredHel=2	Topology=i27-49o59-81i
Rv1235	PROBABLE SUGAR-BINDING LIPOPROTEIN LPQY	1	0.649	27-28	cytoplasm	Not extracellular	Not plasma membrane	Plasma membrane	Unknown	Rv1235 0 Y n11-22c27/28o	ExpAA=6.68	First60=6.65	PredHel=0	Topology=o
Rv1236	PROBABLE SUGAR-TRANSPORT INTEGRAL MEMBRANE PROTEIN ABC TRANSPORTER SUGA	0.608	0.589	42-43	Not cytoplasm	Not extracellular	plasma membrane	Plasma membrane	CytoplasmicMembrane	Rv1236 6 0 i25-50o80-110i122-142o176-195i216-234o270-292i	ExpAA=130.64	First60=22.97	PredHel=5	Topology=i25-47o87-109i122-144o216-234i270-292o	x		x
Rv1244	PROBABLE LIPOPROTEIN LPQZ	1	0.619	24-25	Not cytoplasm	Not extracellular	Not plasma membrane	Plasma membrane	Unknown	Rv1244 0 Y n6-17c25/26o	ExpAA=20.08	First60=19.36	PredHel=0	Topology=o		x
Rv1250	PROBABLE DRUG-TRANSPORT INTEGRAL MEMBRANE PROTEIN	0.968	0.838	39-40	Not cytoplasm	Not extracellular	plasma membrane	Plasma membrane	CytoplasmicMembrane	Rv1250 13 0 o20-41i53-74o86-113i143-162o174-194i206-223o235-254i275-297o309-329i336-354o366-389i410-429o467	ExpAA=273.07	First60=32.19	PredHel=12	Topology=o20-42i49-71o86-108i143-165o175-197i204-223o233-252i275-297o307-329i336-353o363-385i468-490o			x
Rv1252	PROBABLE LIPOPROTEIN LPRE	0.794	0.268	37-38	Not cytoplasm	Not extracellular	plasma membrane	Extracell	Unknown	Rv1252c 0 0 i	ExpAA=1.95	First60=1.94	PredHel=0	Topology=o
Rv1258c	PROBABLE CONSERVED INTEGRAL MEMBRANE TRANSPORT PROTEIN	0.997	0.291	21-22	Not cytoplasm	Not extracellular	plasma membrane	Plasma membrane	CytoplasmicMembrane	Rv1258c 12 0 i12-34o46-69i76-97o103-123i144-168o174-193i224-242o262-282i289-308o314-336i348-368o374-395i	ExpAA=260.37	First60=40.63	PredHel=12	Topology=i7-29o44-66i73-95o100-122i149-171o175-197i218-240o260-282i289-308o313-335i348-370o375-397i			x
Rv1268c	HYPOTHETICAL PROTEIN	1	0.98	32-33	Not cytoplasm	Not extracellular	plasma membrane	Cytoplasm	Unknown	Rv1268c 0 Y n13-24c32/33o	ExpAA=18.39	First60=18.31	PredHel=1	Topology=i13-35o	x		x
Rv1269c	CONSERVED PROBABLE SECRETED PROTEIN	1	0.998	35-36	Not cytoplasm	Not extracellular	plasma membrane	Extracell	Unknown	Rv1269c 0 Y n12-23c35/36o	ExpAA=17.70	First60=17.66	PredHel=0	Topology=i	x		x
Rv1270c	POSSIBLE LIPOPROTEIN LPRA	0.999	0.658	34-35	Not cytoplasm	Not extracellular	plasma membrane	Extracell	CytoplasmicMembrane	Rv1270c 0 Y n6-16c21/22o	ExpAA=16.22	First60=16.21	PredHel=1	Topology=i7-24o		x	x
Rv1271c	CONSERVED HYPOTHETICAL SECRETED PROTEIN	1	0.992	34-35	Not cytoplasm	extracellular	Not plasma membrane	Extracell	Unknown	Rv1271c 0 Y n9-24c29/30o	ExpAA=21.64	First60=21.63	PredHel=1	Topology=o10-32i			x
Rv1273c	PROBABLE DRUGS-TRANSPORT TRANSMEMBRANE ATP-BINDING PROTEIN ABC TRANSPORTER	1	0.995	39-40	Not cytoplasm	Not extracellular	plasma membrane	Plasma membrane	CytoplasmicMembrane	Rv1273c 5 Y n23-34c39/40o55-78i125-151o157-176i239-259o271-298i	ExpAA=134.72	First60=27.93	PredHel=6	Topology=o20-42i54-76o126-148i155-177o240-262i275-297o			x
Rv1274	POSSIBLE LIPOPROTEIN LPRB	1	0.567	44-45	Not cytoplasm	Not extracellular	plasma membrane	Cytoplasm	Unknown	Rv1274 0 Y n8-19c23/24o	ExpAA=6.40	First60=4.40	PredHel=0	Topology=o		x
Rv1275	POSSIBLE LIPOPROTEIN LPRC	1	0.581	34-35	No Prediction	No Prediction	No Prediction	Plasma membrane	Unknown	Rv1275 0 Y n4-15c19/20o	ExpAA=14.78	First60=14.75	PredHel=0	Topology=o		x
Rv1282c	PROBABLE OLIGOPEPTIDE-TRANSPORT INTEGRAL MEMBRANE PROTEIN ABC TRANSPORTER OPPC	1	0.528	35-36	Not cytoplasm	Not extracellular	plasma membrane	Plasma membrane	CytoplasmicMembrane	Rv1282c 5 Y n20-32c37/38o85-109i116-137o143-165i208-229o249-270i	ExpAA=132.38	First60=22.23	PredHel=6	Topology=i20-42o87-109i116-138o143-165i196-218o248-270i			x
Rv1283c	PROBABLE OLIGOPEPTIDE-TRANSPORT INTEGRAL MEMBRANE PROTEIN ABC TRANSPORTER OPPB	0.998	0.545	53-54	Not cytoplasm	Not extracellular	plasma membrane	Plasma membrane	CytoplasmicMembrane	Rv1283c 6 0 i12-31o101-122i134-156o189-207i246-272o292-318i	ExpAA=132.07	First60=22.44	PredHel=6	Topology=i9-31o100-122i135-157o189-208i246-268o292-314i		x	x
Rv1291c	CONSERVED HYPOTHETICAL SECRETED PROTEIN	1	0.999	33-34	Not cytoplasm	extracellular	Not plasma membrane	Extracell	Unknown	Rv1291c 0 Y n14-25c33/34o	ExpAA=18.51	First60=18.50	PredHel=1	Topology=i7-29o	x		x
Rv1296	PROBABLE HOMOSERINE KINASE THRB	0.978	0.41	21-22	cytoplasm	Not extracellular	Not plasma membrane	Plasma membrane	Unknown	Rv1296 0 Y n2-13c18/19o	ExpAA=2.13	First60=1.79	PredHel=0	Topology=o
Rv1305	PROBABLE ATP SYNTHASE C CHAIN ATPE	0.65	0.249	23-24	Not cytoplasm	Not extracellular	plasma membrane	Plasma membrane	Unknown	Rv1305 1 Y n4-15c23/24o53-77i	ExpAA=45.75	First60=29.75	PredHel=2	Topology=i5-27o54-76i			x
Rv1312	CONSERVED HYPOTHETICAL SECRETED PROTEIN	0.637	0.386	21-22	Not cytoplasm	Not extracellular	plasma membrane	Cytoplasm	Cytoplasmic	Rv1312 1 0 o6-27i	ExpAA=22.11	First60=22.10	PredHel=1	Topology=o5-27i			x
Rv1339	CONSERVED HYPOTHETICAL PROTEIN	0.645	0.29	38-39	cytoplasm	Not extracellular	Not plasma membrane	Cytoplasm	Unknown	Rv1339 0 0 i	ExpAA=0.62	First60=0.62	PredHel=0	Topology=o		x
Rv1343c	PROBABLE CONSERVED LIPOPROTEIN LPRD	0.921	0.58	26-27	Not cytoplasm	Not extracellular	plasma membrane	Cytoplasm	Unknown	Rv1343c 2 0 i12-30o42-60i	ExpAA=39.67	First60=37.96	PredHel=2	Topology=i9-31o46-64i			x
Rv1349	PROBABLE DRUGS-TRANSPORT TRANSMEMBRANE ATP-BINDING PROTEIN ABC TRANSPORTER	0.784	0.431	32-33	Not cytoplasm	Not extracellular	plasma membrane	Plasma membrane	CytoplasmicMembrane	Rv1349 5 0 i20-47o53-73i124-150o156-178i242-264o	ExpAA=114.90	First60=30.36	PredHel=5	Topology=i21-43o53-70i124-146o156-178i242-264o
Rv1351	HYPOTHETICAL PROTEIN	0.556	0.398	63-64	No Prediction	No Prediction	No Prediction	Extracell	Unknown	Rv1351 0 Y n34-45c50/51o	ExpAA=0.83	First60=0.83	PredHel=0	Topology=o
Rv1352	CONSERVED HYPOTHETICAL PROTEIN	1	0.994	30-31	Not cytoplasm	Not extracellular	Not plasma membrane	Extracell	Unknown	Rv1352 0 Y n4-15c20/21o	ExpAA=17.14	First60=16.78	PredHel=1	Topology=i5-27o	x		x
Rv1368	PROBABLE CONSERVED LIPOPROTEIN LPRF	0.999	0.698	38-39	Not cytoplasm	Not extracellular	plasma membrane	Cytoplasm	CytoplasmicMembrane	Rv1368 0 Y n20-32c37/38o	ExpAA=18.90	First60=18.87	PredHel=1	Topology=i20-37o			x
Rv1382	PROBABLE EXPORT OR MEMBRANE PROTEIN	0.637	0.615	24-25	Not cytoplasm	Not extracellular	Not plasma membrane	Plasma membrane	Unknown	Rv1382 1 0 o6-28i	ExpAA=24.81	First60=21.75	PredHel=1	Topology=o5-27i			x
Rv1386	PE FAMILY PROTEIN	0.862	0.819	29-30	Not cytoplasm	Not extracellular	Not plasma membrane	Extracell	Cytoplasmic	Rv1386 0 0 i	ExpAA=0.63	First60=0.63	PredHel=0	Topology=o
Rv1396c	PE-PGRS FAMILY PROTEIN	0.999	0.672	33-34	Not cytoplasm	Not extracellular	Not plasma membrane	Extracell	Extracellular	Rv1396c 0 0 i	ExpAA=0.08	First60=0.06	PredHel=0	Topology=o			x
Rv1410c	AMINOGLYCOSIDES/TETRACYCLINE-TRANSPORT INTEGRAL MEMBRANE PROTEIN	0.6	0.293	23-24	Not cytoplasm	Not extracellular	plasma membrane	Plasma membrane	CytoplasmicMembrane	Rv1410c 13 Y n7-18c23/24o47-65i77-98o110-130i142-164o170-189i201-222o234-252i272-290o310-329i336-352o379-401i408	ExpAA=304.00	First60=37.79	PredHel=14	Topology=i7-29o44-66i78-99o109-131i138-160o170-189i201-220o230-252i265-287o307-329i336-353o379-401i413-435o470-492i			x
Rv1411c	PROBABLE CONSERVED LIPOPROTEIN LPRG	1	0.382	35-36	Not cytoplasm	Not extracellular	plasma membrane	Extracell	CytoplasmicMembrane	Rv1411c 0 Y n11-21c26/27o	ExpAA=10.79	First60=10.78	PredHel=0	Topology=i		x	x
Rv1418	PROBABLE LIPOPROTEIN LPRH	0.931	0.304	34-35	Not cytoplasm	Not extracellular	plasma membrane	Cytoplasm	CytoplasmicMembrane	Rv1418 0 Y n11-22c26/27o	ExpAA=24.35	First60=21.20	PredHel=1	Topology=i12-34o		x
Rv1419	HYPOTHETICAL PROTEIN	0.996	0.804	33-34	Not cytoplasm	extracellular	Not plasma membrane	Cytoplasm	Unknown	Rv1419 0 Y n6-21c33/34o	ExpAA=15.05	First60=15.04	PredHel=0	Topology=o
Rv1430	PE FAMILY PROTEIN	0.995	0.619	32-33	Not cytoplasm	Not extracellular	plasma membrane	Plasma membrane	Unknown	Rv1430 1 0 o503-522i	ExpAA=22.65	First60=0.04	PredHel=1	Topology=o500-522i
Rv1433	POSSIBLE CONSERVED EXPORTED PROTEIN	0.982	0.641	30-31	Not cytoplasm	Not extracellular	plasma membrane	Cytoplasm	Cytoplasmic	Rv1433 0 Y n4-15c20/21o	ExpAA=18.26	First60=18.15	PredHel=1	Topology=i7-29o
Rv1435c	PROBABLE CONSERVED PROLINE, GLYCINE, VALINE-RICH SECRETED PROTEIN	1	0.991	33-34	Not cytoplasm	extracellular	Not plasma membrane	Extracell	Unknown	Rv1435c 0 Y n14-25c33/34o	ExpAA=15.40	First60=14.34	PredHel=0	Topology=o
Rv1441c	PE-PGRS FAMILY PROTEIN	0.999	0.492	32-33	Not cytoplasm	Not extracellular	plasma membrane	Extracell	Extracellular	Rv1441c 0 Y n4-14c32/33o	ExpAA=0.94	First60=0.90	PredHel=0	Topology=o	x		x
Rv1450c	PE-PGRS FAMILY PROTEIN	0.729	0.512	32-33	Not cytoplasm	Not extracellular	Not plasma membrane	Extracell	Extracellular	Rv1450c 0 0 i	ExpAA=1.27	First60=0.11	PredHel=0	Topology=o			x
Rv1468c	PE-PGRS FAMILY PROTEIN	0.979	0.684	33-34	Not cytoplasm	Not extracellular	plasma membrane	Extracell	Extracellular	Rv1468c 0 0 i	ExpAA=2.77	First60=0.08	PredHel=0	Topology=o	x
Rv1477	HYPOTHETICAL INVASION PROTEIN	1	0.991	39-40	Not cytoplasm	extracellular	Not plasma membrane	Cytoplasm	Extracellular	Rv1477 0 Y n20-31c39/40o	ExpAA=8.73	First60=8.62	PredHel=0	Topology=o	x
Rv1478	HYPOTHETICAL INVASION PROTEIN	1	0.996	31-32	Not cytoplasm	extracellular	Not plasma membrane	Extracell	Extracellular	Rv1478 0 Y n11-23c31/32o	ExpAA=14.44	First60=12.71	PredHel=0	Topology=o
Rv1487	CONSERVED MEMBRANE PROTEIN	0.559	0.377	35-36	Not cytoplasm	Not extracellular	plasma membrane	Plasma membrane	Unknown	Rv1487 1 Y n3-14c19/20o43-65i	ExpAA=45.66	First60=40.49	PredHel=2	Topology=i5-27o42-64i			x
Rv1488	POSSIBLE EXPORTED CONSERVED PROTEIN	0.998	0.812	34-35	Not cytoplasm	Not extracellular	plasma membrane	Cytoplasm	Unknown	Rv1488 0 Y n4-22c34/35o	ExpAA=22.51	First60=22.43	PredHel=1	Topology=i7-29o
Rv1522c	PROBABLE CONSERVED TRANSMEMBRANE TRANSPORT PROTEIN MMPL12	0.756	0.718	49-50	Not cytoplasm	Not extracellular	plasma membrane	Plasma membrane	CytoplasmicMembrane	Rv1522c 11 0 o20-42i199-216o254-274i295-318o330-353i382-404o824-843i850-875o881-901i922-948o954-973i	ExpAA=268.42	First60=22.92	PredHel=11	Topology=o20-42i214-236o251-273i294-316o331-353i381-403o826-848i853-875o881-903i916-938o942-964i			x
Rv1541c	POSSIBLE LIPOPROTEIN lprI	0.999	0.494	30-31	Not cytoplasm	Not extracellular	plasma membrane	Cytoplasm	Unknown	Rv1541c 0 Y n3-13c17/18o	ExpAA=0.35	First60=0.35	PredHel=0	Topology=o		x
Rv1548c	PPE FAMILY PROTEIN	0.929	0.489	27-28	Not cytoplasm	Not extracellular	plasma membrane	Extracell	Extracellular	Rv1548c 0 0 i	ExpAA=6.53	First60=5.68	PredHel=0	Topology=o			x
Rv1552	PROBABLE FUMARATE REDUCTASE [FLAVOPROTEIN SUBUNIT] FRDA (FUMARATE DEHYDROGENASE) (FUMARIC HYDROGENASE)	0.796	0.792	24-25	cytoplasm	Not extracellular	plasma membrane	Cytoplasm	Cytoplasmic	Rv1552 0 0 i	ExpAA=3.48	First60=3.46	PredHel=0	Topology=o
Rv1555	PROBABLE FUMARATE REDUCTASE [MEMBRANE ANCHOR SUBUNIT]	0.531	0.417	44-45	Not cytoplasm	Not extracellular	plasma membrane	Plasma membrane	CytoplasmicMembrane	Rv1555 3 0 i18-45o65-83i103-123o	ExpAA=69.73	First60=26.37	PredHel=3	Topology=i17-39o59-81i102-124o			x
Rv1566c	POSSIBLE inv PROTEIN	1	0.894	30-31	Not cytoplasm	extracellular	Not plasma membrane	Extracell	Extracellular	Rv1566c 0 Y n7-18c30/31o	ExpAA=22.71	First60=21.43	PredHel=1	Topology=i7-29o	x		x
Rv1607	PROBABLE IONIC TRANSPORTER INTEGRAL MEMBRANE PROTEIN chaA	0.995	0.871	45-46	Not cytoplasm	Not extracellular	plasma membrane	Plasma membrane	CytoplasmicMembrane	Rv1607 11 0 i7-24o30-49i61-85o97-118i130-150o162-180i212-231o251-271i283-306o312-334i341-359o	ExpAA=225.70	First60=40.24	PredHel=11	Topology=i5-22o26-48i61-83o96-118i130-152o162-181i212-231o241-263i283-305o315-334i341-359o			x
Rv1620c	PROBABLE 'COMPONENT LINKED WITH THE ASSEMBLY OF CYTOCHROME' TRANSPORT TRANSMEMBRANE ATP-BINDING PROTEIN ABC TRANSPORTER CYDC	0.987	0.696	50-51	Not cytoplasm	Not extracellular	plasma membrane	Plasma membrane	CytoplasmicMembrane	Rv1620c 6 0 i28-53o65-82i143-162o168-187i258-280o286-308i	ExpAA=116.11	First60=23.57	PredHel=4	Topology=o28-50i140-162o166-188i265-287o
Rv1621c	PROBABLE 'COMPONENT LINKED WITH THE ASSEMBLY OF CYTOCHROME' TRANSPORT TRANSMEMBRANE ATP-BINDING PROTEIN ABC TRANSPORTER CYDD	0.711	0.58	24-25	Not cytoplasm	Not extracellular	plasma membrane	Plasma membrane	CytoplasmicMembrane	Rv1621c 7 0 o6-27i39-59o116-137i144-162o168-188i221-242o248-265i	ExpAA=119.87	First60=40.85	PredHel=6	Topology=o4-26i39-61o115-137i142-164o221-243i248-270o			x
Rv1625c	MEMBRANE-ANCHORED ADENYLYL CYCLASE CYA (ATP PYROPHOSPHATE-LYASE) (ADENYLATE CYCLASE)	0.79	0.743	45-46	Not cytoplasm	Not extracellular	plasma membrane	Plasma membrane	CytoplasmicMembrane	Rv1625c 6 0 i21-43o49-68i75-93o99-116i123-142o154-177i	ExpAA=128.49	First60=35.83	PredHel=6	Topology=i21-43o47-69i71-93o99-118i123-142o155-177i			x
Rv1648	PROBABLE TRANSMEMBRANE PROTEIN	0.962	0.946	38-39	Not cytoplasm	Not extracellular	plasma membrane	Plasma membrane	CytoplasmicMembrane	Rv1648 7 Y n19-30c38/39o71-89i96-121o133-150i157-175o181-198i205-224o230-247i	ExpAA=149.53	First60=21.62	PredHel=7	Topology=i12-34o63-85i98-117o132-151i158-180o200-219i224-246o			x
Rv1651c	PE-PGRS FAMILY PROTEIN	0.941	0.556	31-32	Not cytoplasm	Not extracellular	Not plasma membrane	Extracell	Extracellular	Rv1651c 0 0 i	ExpAA=2.85	First60=0.00	PredHel=0	Topology=o			x
Rv1677	PROBABLE CONSERVED LIPOPROTEIN DSBF	1	0.899	38-39	Not cytoplasm	extracellular	plasma membrane	Extracell	Extracellular	Rv1677 0 Y n6-17c21/22o	ExpAA=0.72	First60=0.72	PredHel=0	Topology=o		x
Rv1690	PROBABLE LIPOPROTEIN LPRJ	0.939	0.489	36-37	Not cytoplasm	Not extracellular	plasma membrane	Extracell	CytoplasmicMembrane	Rv1690 1 Y n18-29c36/37o100-121i	ExpAA=45.74	First60=21.43	PredHel=2	Topology=i21-40o100-122i	x		x
Rv1698	CONSERVED HYPOTHETICAL PROTEIN	0.988	0.449	35-36	Not cytoplasm	Not extracellular	Not plasma membrane	Plasma membrane	Unknown	Rv1698 0 Y n8-19c25/26o	ExpAA=22.62	First60=22.60	PredHel=1	Topology=i7-29o
Rv1707	PROBABLE CONSERVED TRANSMEMBRANE PROTEIN	0.999	0.509	36-37	Not cytoplasm	Not extracellular	plasma membrane	Plasma membrane	CytoplasmicMembrane	Rv1707 11 Y n9-20c25/26o35-54i61-77o83-101i113-131o137-155i162-179o216-240i260-282o294-312i317-337o349-377i	ExpAA=234.40	First60=42.89	PredHel=11	Topology=o10-32i39-61o76-98i105-127o137-155i162-179o214-236i256-278o293-312i314-336o356-378i			x
Rv1732c	CONSERVED HYPOTHETICAL PROTEIN	0.957	0.947	25-26	Not cytoplasm	Not extracellular	plasma membrane	Cytoplasm	Unknown	Rv1732c 0 Y n8-19c25/26o	ExpAA=0.04	First60=0.04	PredHel=0	Topology=o
Rv1733c	PROBABLE CONSERVED TRANSMEMBRANE PROTEIN	0.974	0.919	62-63	No Prediction	No Prediction	No Prediction	Plasma membrane	Unknown	Rv1733c 2 0 i41-63o164-185i	ExpAA=45.20	First60=17.42	PredHel=2	Topology=i44-66o164-186i			x
Rv1744c	PROBABLE MEMBRANE PROTEIN	0.999	0.284	54-55	Not cytoplasm	Not extracellular	Not plasma membrane	Extracell	CytoplasmicMembrane	Rv1744c 0 0 i	ExpAA=46.94	First60=34.81	PredHel=2	Topology=i12-34o49-71i	x		x
Rv1753c	PPE FAMILY PROTEIN	0.98	0.977	27-28	Not cytoplasm	Not extracellular	plasma membrane	Extracell	CytoplasmicMembrane	Rv1753c 0 0 i	ExpAA=9.03	First60=0.63	PredHel=0	Topology=o			x
Rv1759c	PE-PGRS FAMILY PROTEIN	0.652	0.458	33-34	Not cytoplasm	Not extracellular	Not plasma membrane	Extracell	Extracellular	Rv1759c 0 0 i	ExpAA=93.03	First60=0.63	PredHel=0	Topology=o			x
Rv1761c	HYPOTHETICAL EXPORTED PROTEIN	0.575	0.575	31-32	No Prediction	No Prediction	No Prediction	Cytoplasm	CytoplasmicMembrane	Rv1761c 1 0 o12-37i	ExpAA=23.94	First60=22.75	PredHel=1	Topology=o15-37i	x		x
Rv1768	PE-PGRS FAMILY PROTEIN	0.974	0.823	33-34	Not cytoplasm	Not extracellular	Not plasma membrane	Extracell	Extracellular	Rv1768 0 Y n4-15c33/34o	ExpAA=8.92	First60=0.24	PredHel=0	Topology=o			x
Rv1788	PE FAMILY PROTEIN	0.998	0.979	32-33	Not cytoplasm	Not extracellular	plasma membrane	Extracell	Extracellular	Rv1788 0 0 i	ExpAA=0.22	First60=0.20	PredHel=0	Topology=o
Rv1791	PE FAMILY PROTEIN	0.863	0.571	32-33	Not cytoplasm	Not extracellular	plasma membrane	Extracell	Extracellular	Rv1791 0 0 i	ExpAA=0.22	First60=0.07	PredHel=0	Topology=o
Rv1796	PROBABLE PROLINE RICH MEMBRANE-ANCHORED MYCOSIN MYCP5 (SERINE PROTEASE) (SUBTILISIN-LIKE PROTEASE) (SUBTILASE-LIKE) (MYCOSIN-5)	1	0.998	39-40	Not cytoplasm	extracellular	Not plasma membrane	Extracell	CytoplasmicMembrane	Rv1796 1 Y n16-27c39/40o554-578i	ExpAA=40.09	First60=17.04	PredHel=2	Topology=i12-34o551-573i	x		x
Rv1797	CONSERVED MEMBRANE PROTEIN	0.524	0.369	30-31	cytoplasm	Not extracellular	Not plasma membrane	Cytoplasm	Cytoplasmic	Rv1797 2 0 i12-31o43-63i	ExpAA=44.47	First60=38.79	PredHel=2	Topology=i7-29o44-66i			x
Rv1799	PROBABLE LIPOPROTEIN LPPT	1	0.512	45-46	Not cytoplasm	Not extracellular	plasma membrane	Extracell	Unknown	Rv1799 0 Y n14-29c34/35o	ExpAA=22.18	First60=22.17	PredHel=1	Topology=i12-34o	x		x
Rv1804c	CONSERVED HYPOTHETICAL PROTEIN	0.998	0.987	22-23	Not cytoplasm	Not extracellular	Not plasma membrane	Extracell	Unknown	Rv1804c 0 Y n3-14c22/23o	ExpAA=3.34	First60=3.32	PredHel=0	Topology=o
Rv1810	CONSERVED HYPOTHETICAL PROTEIN	1	0.995	35-36	Not cytoplasm	Not extracellular	Not plasma membrane	Cytoplasm	Unknown	Rv1810 0 Y n16-27c35/36o	ExpAA=23.71	First60=19.10	PredHel=1	Topology=i13-32o	x		x
Rv1813c	CONSERVED HYPOTHETICAL PROTEIN	1	0.793	32-33	Not cytoplasm	Not extracellular	plasma membrane	Cytoplasm	Unknown	Rv1813c 0 Y n12-27c32/33o	ExpAA=33.64	First60=29.34	PredHel=1	Topology=i13-35o	x
Rv1815	CONSERVED HYPOTHETICAL PROTEIN	1	0.998	27-28	Not cytoplasm	extracellular	Not plasma membrane	Cytoplasm	Unknown	Rv1815 0 Y n8-19c27/28o	ExpAA=5.49	First60=5.36	PredHel=0	Topology=o
Rv1818c	PE-PGRS FAMILY PROTEIN	0.991	0.327	32-33	Not cytoplasm	Not extracellular	plasma membrane	Extracell	CytoplasmicMembrane	Rv1818c 0 0 i	ExpAA=171.76	First60=6.62	PredHel=0	Topology=o
Rv1840c	PE-PGRS FAMILY PROTEIN	0.975	0.674	32-33	Not cytoplasm	Not extracellular	plasma membrane	Extracell	Extracellular	Rv1840c 0 Y n3-14c32/33o	ExpAA=3.13	First60=2.10	PredHel=0	Topology=o			x
Rv1841c	CONSERVED HYPOTHETICAL MEMBRANE PROTEIN	0.794	0.44	26-27	Not cytoplasm	Not extracellular	plasma membrane	Plasma membrane	CytoplasmicMembrane	Rv1841c 0 Y n3-14c18/19o	ExpAA=51.06	First60=23.82	PredHel=1	Topology=i7-29o
Rv1842c	CONSERVED HYPOTHETICAL MEMBRANE PROTEIN	0.986	0.808	26-27	Not cytoplasm	Not extracellular	plasma membrane	Cytoplasm	CytoplasmicMembrane	Rv1842c 2 Y n6-17c25/26o106-126i138-157o	ExpAA=71.33	First60=22.41	PredHel=2	Topology=o10-32i105-127o
Rv1845c	CONSERVED HYPOTHETICAL TRANSMEMBRANE PROTEIN	0.927	0.771	22-23	Not cytoplasm	Not extracellular	plasma membrane	Plasma membrane	CytoplasmicMembrane	Rv1845c 4 Y n3-14c21/22o37-57i69-85o91-111i282-307o	ExpAA=89.73	First60=43.01	PredHel=4	Topology=o4-22i35-57o85-107i282-304o			x
Rv1857	PROBABLE MOLYBDATE-BINDING LIPOPROTEIN MODA	1	0.713	45-46	Not cytoplasm	Not extracellular	plasma membrane	Plasma membrane	Unknown	Rv1857 0 Y n6-17c22/23o	ExpAA=3.35	First60=2.90	PredHel=0	Topology=o	x	x
Rv1860	ALANINE AND PROLINE RICH SECRETED PROTEIN APA (FIBRONECTIN ATTACHMENT PROTEIN) (Immunogenic protein MPT32) (Antigen MPT-32) (45-kDa glycoprotein) (45/47 kDa antigen)	1	0.444	39-40	Not cytoplasm	extracellular	Not plasma membrane	Extracell	Extracellular	Rv1860 0 Y n15-33c39/40o	ExpAA=20.87	First60=20.87	PredHel=1	Topology=i13-35o	x		x
Rv1881c	POSSIBLE CONSERVED LIPOPROTEIN LPPE	1	0.54	25-26	Not cytoplasm	Not extracellular	plasma membrane	Cytoplasm	Unknown	Rv1881c 0 Y n5-16c25/26o	ExpAA=15.64	First60=15.63	PredHel=1	Topology=i5-27o		x	x
Rv1885c	CONSERVED HYPOTHETICAL PROTEIN	1	0.996	33-34	cytoplasm	Not extracellular	Not plasma membrane	Cytoplasm	Cytoplasmic	Rv1885c 0 Y n10-21c33/34o	ExpAA=18.90	First60=18.90	PredHel=1	Topology=i7-29o			x
Rv1886c	SECRETED ANTIGEN 85-B FBPB (85B) (ANTIGEN 85 COMPLEX B) (MYCOLYL TRANSFERASE 85B) (FIBRONECTIN-BINDING PROTEIN B) (EXTRACELLULAR ALPHA-ANTIGEN)	1	0.905	40-41	Not cytoplasm	extracellular	Not plasma membrane	Extracell	Extracellular	Rv1886c 0 Y n20-31c40/41o	ExpAA=22.90	First60=22.08	PredHel=1	Topology=i20-42o	x		x
Rv1889c	CONSERVED HYPOTHETICAL PROTEIN	0.602	0.28	32-33	cytoplasm	Not extracellular	Not plasma membrane	Cytoplasm	Unknown	Rv1889c 0 0 i	ExpAA=1.16	First60=1.13	PredHel=0	Topology=i	x
Rv1891	CONSERVED HYPOTHETICAL PROTEIN	0.999	0.862	24-25	Not cytoplasm	Not extracellular	Not plasma membrane	Extracell	Unknown	Rv1891 0 Y n5-16c24/25o	ExpAA=2.31	First60=2.29	PredHel=0	Topology=o			x
Rv1899c	POSSIBLE LIPOPROTEIN LPPD	0.944	0.661	29-30	Not cytoplasm	extracellular	Not plasma membrane	Extracell	Cytoplasmic	Rv1899c 0 Y n10-21c29/30o	ExpAA=6.64	First60=6.37	PredHel=0	Topology=o	x
Rv1903	PROBABLE CONSERVED MEMBRANE PROTEIN	0.996	0.743	28-29	Not cytoplasm	Not extracellular	plasma membrane	Plasma membrane	CytoplasmicMembrane	Rv1903 3 Y n8-20c28/29o38-58i65-89o101-124i	ExpAA=86.85	First60=41.51	PredHel=4	Topology=i5-27o37-58i65-87o102-124i			x
Rv1905c	PROBABLE D-AMINO ACID OXIDASE AAO	0.846	0.817	35-36	cytoplasm	Not extracellular	Not plasma membrane	Cytoplasm	Cytoplasmic	Rv1905c 0 0 i	ExpAA=11.12	First60=11.12	PredHel=0	Topology=o
Rv1906c	CONSERVED HYPOTHETICAL PROTEIN	1	0.97	32-33	Not cytoplasm	Not extracellular	plasma membrane	Cytoplasm	Unknown	Rv1906c 0 Y n10-20c32/33o	ExpAA=20.62	First60=20.52	PredHel=1	Topology=o10-32i	x		x
Rv1910c	PROBABLE EXPORTED PROTEIN	0.993	0.737	33-34	cytoplasm	Not extracellular	Not plasma membrane	Extracell	CytoplasmicMembrane	Rv1910c 0 Y n8-21c25/26o	ExpAA=21.06	First60=19.70	PredHel=1	Topology=o4-26i			x
Rv1911c	PROBABLE LIPOPROTEIN LPPC	0.979	0.56	31-32	Not cytoplasm	Not extracellular	plasma membrane	Extracell	Unknown	Rv1911c 0 Y n10-21c26/27o	ExpAA=3.57	First60=3.52	PredHel=0	Topology=o		x	x
Rv1918c	PPE FAMILY PROTEIN	0.88	0.493	41-42	Not cytoplasm	Not extracellular	plasma membrane	Extracell	Extracellular	Rv1918c 0 0 i	ExpAA=71.79	First60=24.39	PredHel=0	Topology=o			x
Rv1921c	PROBABLE CONSERVED LIPOPROTEIN LPPF	0.996	0.595	32-33	Not cytoplasm	extracellular	Not plasma membrane	Cytoplasm	Unknown	Rv1921c 0 Y n4-15c23/24o	ExpAA=0.99	First60=0.98	PredHel=0	Topology=o		x
Rv1922	PROBABLE CONSERVED LIPOPROTEIN	0.999	0.723	34-35	Not cytoplasm	Not extracellular	plasma membrane	Cytoplasm	Extracellular	Rv1922 0 Y n13-22c27/28o	ExpAA=10.91	First60=10.89	PredHel=0	Topology=o	x	x
Rv1926c	IMMUNOGENIC PROTEIN MPT63 (ANTIGEN MPT63/MPB63) (16 kDa IMMUNOPROTECTIVE EXTRACELLULAR PROTEIN)	1	0.882	29-30	Not cytoplasm	extracellular	Not plasma membrane	Extracell	Extracellular	Rv1926c 0 Y n10-21c29/30o	ExpAA=22.82	First60=22.70	PredHel=1	Topology=i12-34o			x
Rv1941	PROBABLE SHORT-CHAIN TYPE DEHYDROGENASE/REDUCTASE	0.591	0.59	29-30	Not cytoplasm	Not extracellular	Not plasma membrane	Plasma membrane	Cytoplasmic	Rv1941 0 0 i	ExpAA=7.40	First60=4.21	PredHel=0	Topology=o
Rv1946c	POSSIBLE LIPOPROTEIN	0.691	0.362	22-23	No Prediction	No Prediction	No Prediction	Plasma membrane	Unknown	Rv1946c 0 Y n4-12c17/18o	ExpAA=1.06	First60=1.00	PredHel=0	Topology=o
Rv1966	MCE-FAMILY PROTEIN MCE3A	0.988	0.488	47-48	Not cytoplasm	Not extracellular	plasma membrane	Extracell	Unknown	Rv1966 1 0 i12-34o	ExpAA=22.43	First60=22.43	PredHel=1	Topology=i13-35o
Rv1967	MCE-FAMILY PROTEIN MCE3B	0.998	0.74	36-37	Not cytoplasm	Not extracellular	Not plasma membrane	Cytoplasm	Unknown	Rv1967 1 0 o12-31i	ExpAA=22.68	First60=22.62	PredHel=1	Topology=i7-29o
Rv1968	MCE-FAMILY PROTEIN MCE3C	0.999	0.779	44-45	cytoplasm	extracellular	Not plasma membrane	Extracell	Unknown	Rv1968 0 Y n10-21c26/27o	ExpAA=20.58	First60=20.56	PredHel=1	Topology=i9-31o			x
Rv1969	MCE-FAMILY PROTEIN MCE3D	1	0.803	31-32	cytoplasm	Not extracellular	Not plasma membrane	Plasma membrane	Unknown	Rv1969 0 Y n11-26c31/32o	ExpAA=19.29	First60=19.26	PredHel=1	Topology=i7-29o
Rv1970	POSSIBLE MCE-FAMILY LIPOPROTEIN LPRM (MCE-FAMILY LIPOPROTEIN MCE3E)	0.97	0.667	39-40	Not cytoplasm	Not extracellular	plasma membrane	Cytoplasm	Unknown	Rv1970 0 Y n3-13c17/18o	ExpAA=1.11	First60=1.11	PredHel=0	Topology=o		x
Rv1971	MCE-FAMILY PROTEIN MCE3F	0.556	0.469	39-40	cytoplasm	Not extracellular	Not plasma membrane	Cytoplasm	Unknown	Rv1971 1 0 i12-31o	ExpAA=22.03	First60=21.89	PredHel=1	Topology=i9-31o
Rv1974	PROBABLE CONSERVED MEMBRANE PROTEIN	1	0.904	36-37	Not cytoplasm	Not extracellular	plasma membrane	Plasma membrane	Unknown	Rv1974 0 Y n12-23c28/29o	ExpAA=21.46	First60=21.04	PredHel=1	Topology=i12-34o	x		x
Rv1975	CONSERVED HYPOTHETICAL PROTEIN	1	0.972	27-28	Not cytoplasm	Not extracellular	Not plasma membrane	Extracell	Unknown	Rv1975 0 Y n8-19c27/28o	ExpAA=7.36	First60=6.77	PredHel=0	Topology=o	x		x
Rv1980c	IMMUNOGENIC PROTEIN MPT64 (ANTIGEN MPT64/MPB64)	1	0.998	23-24	Not cytoplasm	extracellular	Not plasma membrane	Extracell	Extracellular	Rv1980c 0 Y n8-18c23/24o	ExpAA=15.72	First60=15.71	PredHel=1	Topology=i5-24o			x
Rv1984c	PROBABLE CUTINASE PRECURSOR CFP21	1	0.823	32-33	Not cytoplasm	extracellular	Not plasma membrane	Extracell	Unknown	Rv1984c 0 Y n10-21c29/30o	ExpAA=14.16	First60=14.06	PredHel=0	Topology=o
Rv1986	PROBABLE CONSERVED INTEGRAL MEMBRANE PROTEIN	0.923	0.685	21-22	Not cytoplasm	Not extracellular	plasma membrane	Plasma membrane	CytoplasmicMembrane	Rv1986 6 0 o6-27i39-62o68-86i107-124o144-166i178-198o	ExpAA=117.19	First60=44.74	PredHel=5	Topology=o5-27i36-58o68-87i144-166o176-198i			x
Rv1987	POSSIBLE CHITINASE	1	0.942	37-38	Not cytoplasm	Not extracellular	plasma membrane	Extracell	Extracellular	Rv1987 0 Y n14-32c37/38o	ExpAA=22.63	First60=22.60	PredHel=1	Topology=i13-35o			x
Rv1999c	PROBABLE CONSERVED INTEGRAL MEMBRANE PROTEIN	0.998	0.995	46-47	Not cytoplasm	Not extracellular	plasma membrane	Plasma membrane	CytoplasmicMembrane	Rv1999c 12 0 i20-45o51-72i93-120o126-143i155-175o187-206i227-250o270-301i322-341o347-366i378-394o400-419i	ExpAA=239.16	First60=35.21	PredHel=10	Topology=i24-46o51-73i94-116o121-143i150-172o187-206i227-249o274-296i345-367o382-415i	x		x
Rv2041c	PROBABLE SUGAR-BINDING LIPOPROTEIN	0.996	0.718	31-32	Not cytoplasm	Not extracellular	plasma membrane	Cytoplasm	Unknown	Rv2041c 0 Y n14-24c32/33o	ExpAA=9.94	First60=0.45	PredHel=0	Topology=o	x
Rv2046	PROBABLE LIPOPROTEIN lppI	0.967	0.692	48-49	Not cytoplasm	Not extracellular	plasma membrane	Extracell	Unknown	Rv2046 0 Y n3-13c18/19o	ExpAA=0.04	First60=0.04	PredHel=0	Topology=o	x	x
Rv2060	POSSIBLE CONSERVED INTEGRAL MEMBRANE PROTEIN	0.931	0.663	32-33	Not cytoplasm	Not extracellular	plasma membrane	Plasma membrane	CytoplasmicMembrane	Rv2060 3 Y n4-15c23/24o39-67i79-103o109-129i	ExpAA=91.22	First60=40.64	PredHel=4	Topology=i5-22o42-64i76-98o108-130i			x
Rv2068	CLASS A BETA-LACTAMASE BLAC	1	0.428	30-31	Not cytoplasm	Not extracellular	plasma membrane	Cytoplasm	Extracellular	Rv2068c 0 Y n11-22c30/31o	ExpAA=1.71	First60=1.21	PredHel=0	Topology=o
Rv2075c	POSIBLE HYPOTHETICAL EXPORTED OR ENVELOPE PROTEIN	1	0.736	30-31	Not cytoplasm	Not extracellular	plasma membrane	Cytoplasm	Unknown	Rv2075c 0 Y n10-21c28/29o	ExpAA=20.55	First60=18.50	PredHel=0	Topology=o
Rv2080	POSSIBLE LIPOPROTEIN lppJ	1	0.583	38-39	Not cytoplasm	Not extracellular	plasma membrane	Extracell	Unknown	Rv2080 0 Y n16-26c30/31o	ExpAA=16.08	First60=16.07	PredHel=1	Topology=i12-34o			x
Rv2099c	PE FAMILY PROTEIN	0.802	0.489	32-33	Not cytoplasm	Not extracellular	plasma membrane	Extracell	Unknown	Rv2099c 0 0 i	ExpAA=0.26	First60=0.26	PredHel=0	Topology=o
Rv2116	PROBABLE CONSERVED LIPOPROTEIN lppK	1	0.82	48-49	Not cytoplasm	Not extracellular	plasma membrane	Extracell	Unknown	Rv2116 0 Y n7-18c23/24o	ExpAA=4.75	First60=4.75	PredHel=0	Topology=o	x	x	x
Rv2120c	PROBABLE CONSERVED INTEGRAL MEMBRANE PROTEIN	1	0.746	31-32	Not cytoplasm	extracellular	plasma membrane	Plasma membrane	CytoplasmicMembrane	Rv2120c 4 Y n4-19c31/32o47-65i77-99o105-124i136-159o	ExpAA=102.62	First60=41.71	PredHel=5	Topology=i5-27o42-64i77-99o104-123i136-158o			x
Rv2128	PROBABLE CONSERVED TRANSMEMBRANE PROTEIN	0.648	0.324	36-37	Not cytoplasm	Not extracellular	plasma membrane	Plasma membrane	Unknown	Rv2128 2 0 i20-39o45-63i	ExpAA=41.91	First60=39.01	PredHel=2	Topology=i20-37o41-63i			x
Rv2138	PROBABLE CONSERVED LIPOPROTEIN LppL	1	0.333	37-38	Not cytoplasm	extracellular	Not plasma membrane	Plasma membrane	Unknown	Rv2138 0 Y n13-23c28/29o	ExpAA=20.41	First60=20.40	PredHel=1	Topology=i13-35o		x
Rv2144c	PROBABLE TRANSMEMBRANE PROTEIN	0.998	0.77	28-29	Not cytoplasm	Not extracellular	Not plasma membrane	Cytoplasm	Unknown	Rv2144c 1 Y n3-14c19/20o29-47i	ExpAA=39.80	First60=39.80	PredHel=2	Topology=i2-21o25-44i			x
Rv2156c	PROBABLE phospho-N-acetylmuramoyl-pentappeptidetransferase MurX	0.733	0.562	27-28	Not cytoplasm	Not extracellular	plasma membrane	Plasma membrane	CytoplasmicMembrane	Rv2156c 10 0 o6-27i48-68o80-100i120-137o157-177i189-211o231-248i255-274o280-301i322-350o	ExpAA=207.88	First60=31.18	PredHel=10	Topology=o4-26i53-75o79-100i121-140o155-177i189-211o231-248i255-277o281-303i334-356o			x
Rv2160c	CONSERVED HYPOTHETICAL PROTEIN	0.729	0.535	24-25	Not cytoplasm	Not extracellular	plasma membrane	Cytoplasm	Cytoplasmic	Rv2160c 0 Y n10-20c24/25o	ExpAA=0.00	First60=0.00	PredHel=0	Topology=o
Rv2162c	PE-PGRS FAMILY PROTEIN	0.848	0.545	32-33	Not cytoplasm	Not extracellular	plasma membrane	Extracell	Extracellular	Rv2162c 0 0 i	ExpAA=0.97	First60=0.90	PredHel=0	Topology=o			x
Rv2171	PROBABLE CONSERVED LIPOPROTEIN lppM	1	0.857	30-31	No Prediction	No Prediction	No Prediction	Extracell	Unknown	Rv2171 1 Y n10-21c27/28o189-210i	ExpAA=37.06	First60=14.42	PredHel=1	Topology=i188-210o			x
Rv2190c	CONSERVED HYPOTHETICAL PROTEIN	1	0.99	37-38	Not cytoplasm	extracellular	Not plasma membrane	Plasma membrane	Extracellular	Rv2190c 0 Y n16-27c32/33o	ExpAA=20.11	First60=20.04	PredHel=1	Topology=i13-35o
Rv2194	PROBABLE Ubiquinol-cytochrome C reductase QcrC(cytochrome C subunit)	1	0.998	54-55	Not cytoplasm	Not extracellular	plasma membrane	Extracell	Unknown	Rv2194 1 Y n25-36c54/55o259-278i	ExpAA=41.77	First60=21.76	PredHel=2	Topology=i25-47o259-278i	x		x
Rv2199c	POSSIBLE CONSERVED INTEGRAL MEMBRANE PROTEIN	0.679	0.586	37-38	Not cytoplasm	Not extracellular	plasma membrane	Plasma membrane	CytoplasmicMembrane	Rv2199c 4 0 i7-30o36-56i90-110o116-134i	ExpAA=81.50	First60=43.94	PredHel=3	Topology=i7-29o34-56i108-130o			x
Rv2200c	PROBABLE TRANSMEMBRANE CYTOCHROME C OXIDASE (SUBUNIT II) CTAC	0.599	0.375	50-51	Not cytoplasm	Not extracellular	plasma membrane	Cytoplasm	CytoplasmicMembrane	Rv2200c 3 0 i31-51o71-95i116-136o	ExpAA=65.58	First60=20.00	PredHel=3	Topology=i31-53o73-95i116-138o	x		x
Rv2201	Probable asparagine synthetase AsnB	0.988	0.942	22-24	Not cytoplasm	Not extracellular	Not plasma membrane	Cytoplasm	Cytoplasmic	Rv2201 0 Y n2-10c22/23o	ExpAA=0.43	First60=0.05	PredHel=0	Topology=o
Rv2208	PROBABLE COBALAMIN 5'-phosphate synthase CobS	0.997	0.465	21-22	Not cytoplasm	Not extracellular	plasma membrane	Plasma membrane	CytoplasmicMembrane	Rv2208 5 Y n4-15c21/22o31-52i107-126o132-152i173-192o198-217i	ExpAA=121.00	First60=28.67	PredHel=4	Topology=i33-55o112-143i164-186o196-218i	x		x
Rv2216	CONSERVED HYPOTHETICAL PROTEIN	0.994	0.63	25-26	cytoplasm	Not extracellular	Not plasma membrane	Cytoplasm	Unknown	Rv2216 0 Y n4-15c25/26o	ExpAA=19.50	First60=15.79	PredHel=0	Topology=o
Rv2223c	PROBABLE EXPORTED PROTEASE	1	0.576	34-35	Not cytoplasm	Not extracellular	plasma membrane	Extracell	Unknown	Rv2223c 0 Y n10-21c33/34o	ExpAA=17.64	First60=17.60	PredHel=1	Topology=i13-35o	x
Rv2224c	PROBABLE EXPORTED PROTEASE	0.999	0.612	42-43	Not cytoplasm	Not extracellular	plasma membrane	Cytoplasm	Cytoplasmic	Rv2224c 0 Y n15-26c31/32o	ExpAA=22.41	First60=22.22	PredHel=1	Topology=i13-35o	x
Rv2251	POSSIBLE FLAVOPROTEIN	0.844	0.441	24-25	cytoplasm	Not extracellular	Not plasma membrane	Cytoplasm	Cytoplasmic	Rv2251 0 0 i	ExpAA=0.09	First60=0.00	PredHel=0	Topology=o
Rv2253	POSSIBLE SECRETED UNKNOWN PROTEIN	1	0.823	28-29	cytoplasm	Not extracellular	Not plasma membrane	Extracell	Unknown	Rv2253 0 Y n10-21c28/29o	ExpAA=1.94	First60=1.92	PredHel=0	Topology=o	x		x
Rv2262c	CONSERVED HYPOTHETICAL PROTEIN	0.998	0.649	28-29	Not cytoplasm	Not extracellular	plasma membrane	Plasma membrane	CytoplasmicMembrane	Rv2262c 7 0 i12-28o34-52i59-78o84-104i116-137o157-185i192-212o	ExpAA=132.03	First60=37.28	PredHel=5	Topology=i12-31o35-54i75-97o163-185i192-214o	x		x
Rv2264c	CONSERVED HYPOTHETICAL PROLINE RICH PROTEIN	0.795	0.746	23-24	Not cytoplasm	extracellular	Not plasma membrane	Extracell	Cellwall	Rv2264c 1 Y n8-18c23/24o425-451i	ExpAA=16.45	First60=0.93	PredHel=0	Topology=o			x
Rv2270	PROBABLE LIPOPROTEIN LPPN	0.998	0.556	44-45	Not cytoplasm	Not extracellular	plasma membrane	Extracell	Unknown	Rv2270 0 Y n8-19c28/29o	ExpAA=2.17	First60=2.16	PredHel=0	Topology=o	x	x
Rv2277c	POSSIBLE GLYCEROLPHOSPHODIESTERASE	0.9	0.456	22-23	Not cytoplasm	Not extracellular	Not plasma membrane	Cytoplasm	Unknown	Rv2277c 0 Y n6-17c22/23o	ExpAA=7.44	First60=7.25	PredHel=0	Topology=o
Rv2284	PROBABLE ESTERASE LipM	0.677	0.314	29-30	Not cytoplasm	Not extracellular	Not plasma membrane	Cytoplasm	CytoplasmicMembrane	Rv2284 3 0 i12-30o42-66i78-95o	ExpAA=61.22	First60=37.86	PredHel=3	Topology=i7-29o44-66i78-95o			x
Rv2289	PROBABLE CDP-DIACYLGLYCEROL PYROPHOSPHATASE Cdh (CDP-diacylglycerol diphosphatase) (CDP-diacylglycerol phosphatidylhydrolase)	1	0.616	32-33	Not cytoplasm	Not extracellular	plasma membrane	Cytoplasm	Unknown	Rv2289 0 Y n7-22c27/28o	ExpAA=22.63	First60=22.62	PredHel=1	Topology=i7-29o
Rv2290	PROBABLE CONSERVED LIPOPROTEIN lppO	1	0.507	46-47	Not cytoplasm	Not extracellular	plasma membrane	Extracell	Unknown	Rv2290 0 Y n11-26c31/32o	ExpAA=5.19	First60=5.17	PredHel=0	Topology=o	x		x
Rv2293c	CONSERVED HYPOTHETICAL PROTEIN	0.999	0.572	24-25	Not cytoplasm	Not extracellular	plasma membrane	Plasma membrane	CytoplasmicMembrane	Rv2293c 0 Y n8-19c24/25o	ExpAA=38.99	First60=13.43	PredHel=0	Topology=o
Rv2297	HYPOTHETICAL PROTEIN	0.983	0.569	32-33	Not cytoplasm	Not extracellular	Not plasma membrane	Cytoplasm	Unknown	Rv2297 0 Y n9-20c32/33o	ExpAA=10.36	First60=10.36	PredHel=0	Topology=o
Rv2301	PROBABLE CUTINASE CUT2	0.994	0.439	32-33	Not cytoplasm	extracellular	Not plasma membrane	Extracell	Unknown	Rv2301 0 Y n3-14c32/33o	ExpAA=11.73	First60=10.13	PredHel=0	Topology=o
Rv2307c	CONSERVED HYPOTHETICAL PROTEIN	0.997	0.412	44-45	Not cytoplasm	Not extracellular	plasma membrane	Cytoplasm	Unknown	Rv2307c 1 0 i7-27o	ExpAA=21.86	First60=21.15	PredHel=1	Topology=i7-29o
Rv2317	PROBABLE SUGAR-TRANSPORT INTEGRAL MEMBRANE PROTEIN ABC TRANSPORTER USPB	0.812	0.408	38-39	Not cytoplasm	Not extracellular	plasma membrane	Plasma membrane	CytoplasmicMembrane	Rv2317 6 0 i12-32o69-95i107-126o138-156i193-214o239-260i	ExpAA=132.70	First60=22.60	PredHel=6	Topology=i12-34o71-93i106-128o138-160i181-203o238-260i			x
Rv2318	PROBABLE PERIPLASMIC SUGAR-BINDING LIPOPROTEIN USPC	1	0.908	32-33	Not cytoplasm	Not extracellular	plasma membrane	Cytoplasm	Unknown	Rv2318 0 Y n9-28c32/33o	ExpAA=22.46	First60=22.41	PredHel=1	Topology=i7-29o
Rv2330c	PROBABLE LIPOPROTEIN LPPP	1	0.486	32-33	Not cytoplasm	Not extracellular	plasma membrane	Extracell	Unknown	Rv2330c 0 Y n7-26c31/32o	ExpAA=23.19	First60=22.55	PredHel=1	Topology=i7-29o	x		x
Rv2333c	PROBABLE CONSERVED INTEGRAL MEMBRANE TRANSPORT PROTEIN	0.952	0.886	38-39	Not cytoplasm	Not extracellular	plasma membrane	Plasma membrane	CytoplasmicMembrane	Rv2333c 14 0 i7-26o46-68i75-98o104-124i136-155o161-182i194-214o220-242i262-280o300-320i327-346o352-376i397-417o478	ExpAA=304.79	First60=39.19	PredHel=14	Topology=i7-29o44-66i73-95o105-127i134-156o161-183i196-214o219-241i261-283o298-320i327-344o354-376i397-419o473-495i			x
Rv2340c	PE-PGRS FAMILY PROTEIN	0.947	0.447	32-33	Not cytoplasm	Not extracellular	plasma membrane	Extracell	Unknown	Rv2340c 0 0 i	ExpAA=0.29	First60=0.28	PredHel=0	Topology=o
Rv2341	PROBABLE CONSERVED LIPOPROTEIN LPPQ	0.94	0.455	33-34	Not cytoplasm	Not extracellular	Not plasma membrane	Extracell	Unknown	Rv2341 0 Y n13-27c35/36o	ExpAA=14.86	First60=14.84	PredHel=0	Topology=o		x
Rv2345	POSSIBLE CONSERVED TRANSMEMBRANE PROTEIN	1	0.999	26-27	cytoplasm	Not extracellular	Not plasma membrane	Plasma membrane	CytoplasmicMembrane	Rv2345 1 Y n10-21c26/27o162-181i	ExpAA=57.99	First60=19.72	PredHel=3	Topology=i7-26o162-181i609-631o			x
Rv2349c	PROBABLE PHOSPHOLIPASE C 3 PLCC	0.993	0.863	32-33	Not cytoplasm	Not extracellular	plasma membrane	Extracell	Extracellular	Rv2349c 0 Y n10-19c23/24o	ExpAA=1.02	First60=0.94	PredHel=0	Topology=o	x		x
Rv2350c	PROBABLE MEMBRANE-ASSOCIATED PHOSPHOLIPASE C 2 PLCB	1	0.89	32-33	Not cytoplasm	Not extracellular	plasma membrane	Extracell	Extracellular	Rv2350c 0 Y n10-19c23/24o	ExpAA=3.91	First60=3.39	PredHel=0	Topology=o	x		x
Rv2351c	PROBABLE MEMBRANE-ASSOCIATED PHOSPHOLIPASE C 1 PLCA (MTP40 ANTIGEN)	0.988	0.858	32-33	Not cytoplasm	Not extracellular	plasma membrane	Extracell	Extracellular	Rv2351c 0 Y n10-19c23/24o	ExpAA=0.29	First60=0.18	PredHel=0	Topology=o	x		x
Rv2366c	PROBABLE CONSERVED TRANSMEMBRANE PROTEIN	0.889	0.631	25-26	Not cytoplasm	Not extracellular	plasma membrane	Cytoplasm	CytoplasmicMembrane	Rv2366c 4 0 o6-27i59-82o88-107i119-138o	ExpAA=82.44	First60=22.40	PredHel=3	Topology=i7-29o60-82i89-111o
Rv2376c	LOW MOLECULAR WEIGHT ANTIGEN CFP2 (LOW MOLECULAR WEIGHT PROTEIN ANTIGEN 2) (CFP-2)	1	0.366	29-30	Not cytoplasm	extracellular	Not plasma membrane	Extracell	Extracellular	Rv2376c 0 Y n6-17c21/22o	ExpAA=22.86	First60=22.85	PredHel=1	Topology=i7-29o			x
Rv2386c	PUTATIVE ISOCHORISMATE SYNTHASE MBTI	0.832	0.458	31-32	Not cytoplasm	Not extracellular	Not plasma membrane	Cytoplasm	Cytoplasmic	Rv2386c 0 Y n4-14c26/27o	ExpAA=0.05	First60=0.00	PredHel=0	Topology=o
Rv2389c	PROBABLE RESUSCITATION-PROMOTING FACTOR RPFD	0.555	0.554	49-50	Not cytoplasm	Not extracellular	plasma membrane	Extracell	Unknown	Rv2389c 1 0 i21-42o	ExpAA=21.98	First60=21.86	PredHel=1	Topology=i21-43o			x
Rv2394	PROBABLE GAMMA-GLUTAMYLTRANSPEPTIDASE PRECURSOR GGTB (GAMMA-GLUTAMYLTRANSFERASE) (GLUTAMYL TRANSPEPTIDASE)	0.998	0.336	28-29	Not cytoplasm	extracellular	Not plasma membrane	Cytoplasm	Extracellular	Rv2394 0 Y n7-18c26/27o	ExpAA=10.75	First60=10.35	PredHel=0	Topology=o	x	x
Rv2396	PE-PGRS FAMILY PROTEIN	1	0.947	33-34	Not cytoplasm	Not extracellular	plasma membrane	Extracell	Unknown	Rv2396 0 Y n10-21c33/34o	ExpAA=8.44	First60=4.04	PredHel=0	Topology=o
Rv2403c	PROBABLE CONSERVED LIPOPROTEIN LPPR	0.992	0.844	28-29	cytoplasm	Not extracellular	Not plasma membrane	Plasma membrane	Unknown	Rv2403c 0 Y n7-18c26/27o	ExpAA=19.96	First60=19.95	PredHel=1	Topology=i7-26o		x
Rv2435c	PROBABLE CYCLASE (ADENYLYL- OR GUANYLYL-)(ADENYLATE- OR GUANYLATE-)	0.623	0.535	56-57	Not cytoplasm	Not extracellular	plasma membrane	Cytoplasm	Unknown	Rv2435c 2 0 i40-60o444-464i	ExpAA=44.04	First60=20.61	PredHel=2	Topology=o40-62i444-466o
Rv2450c	PROBABLE RESUSCITATION-PROMOTING FACTOR RPFE	1	0.997	28-29	Not cytoplasm	extracellular	Not plasma membrane	Cytoplasm	Unknown	Rv2450c 0 Y n8-19c28/29o	ExpAA=7.04	First60=7.03	PredHel=0	Topology=o			x
Rv2452c	HYPOTHETICAL PROTEIN	0.998	0.505	35-36	No Prediction	No Prediction	No Prediction	Short Sequence	Unknown	Rv2452c 0 Y n6-19c27/28o	ExpAA=18.89	First60=18.89	PredHel=1	Topology=i7-29o			x
Rv2469c	CONSERVED HYPOTHETICAL PROTEIN	0.742	0.373	28-29	Not cytoplasm	Not extracellular	Not plasma membrane	Cytoplasm	Unknown	Rv2469c 0 Y n15-26c31/32o	ExpAA=0.12	First60=0.10	PredHel=0	Topology=o	x
Rv2487c	PE-PGRS FAMILY PROTEIN	0.993	0.415	30-31	Not cytoplasm	Not extracellular	Not plasma membrane	Extracell	Extracellular	Rv2487c 0 Y n3-14c32/33o	ExpAA=0.09	First60=0.03	PredHel=0	Topology=o			x
Rv2507	POSSIBLE CONSERVED PROLINE RICH MEMBRANE PROTEIN	0.915	0.914	36-37	Not cytoplasm	Not extracellular	plasma membrane	Extracell	Unknown	Rv2507 1 0 o110-132i	ExpAA=23.02	First60=0.00	PredHel=1	Topology=o110-132i			x
Rv2518c	PROBABLE CONSERVED LIPOPROTEIN LPPS	0.994	0.646	48-49	Not cytoplasm	Not extracellular	plasma membrane	Cytoplasm	Unknown	Rv2518c 1 0 i20-40o	ExpAA=20.29	First60=20.15	PredHel=1	Topology=i20-42o	x		x
Rv2519	PE FAMILY PROTEIN	0.859	0.647	33-34	Not cytoplasm	Not extracellular	plasma membrane	Extracell	Unknown	Rv2519 0 Y n4-15c33/34o	ExpAA=0.31	First60=0.20	PredHel=0	Topology=o			x
Rv2525c	CONSERVED HYPOTHETICAL PROTEIN	1	0.766	35-36	Not cytoplasm	Not extracellular	Not plasma membrane	Extracell	Unknown	Rv2525c 0 Y n11-22c30/31o	ExpAA=4.55	First60=4.37	PredHel=0	Topology=o	x		x
Rv2532c	HYPOTHETICAL PROTEIN	1	0.506	36-37	No Prediction	No Prediction	No Prediction	Plasma membrane	Cytoplasmic	Rv2532c 2 Y n8-16c21/22o31-52i73-93o	ExpAA=51.68	First60=42.40	PredHel=2	Topology=i9-31o36-58i			x
Rv2536	PROBABLE CONSERVED TRANSMEMBRANE PROTEIN	0.702	0.611	28-29	Not cytoplasm	extracellular	Not plasma membrane	Plasma membrane	CytoplasmicMembrane	Rv2536 3 Y n8-18c23/24o33-54i75-98o110-136i	ExpAA=87.08	First60=41.64	PredHel=4	Topology=i7-26o31-53i73-95o110-132i			x
Rv2553c	PROBABLE CONSERVED MEMBRANE PROTEIN	0.999	0.61	62-63	Not cytoplasm	Not extracellular	Not plasma membrane	Cytoplasm	Cytoplasmic	Rv2553c 1 0 i42-66o	ExpAA=21.94	First60=18.72	PredHel=1	Topology=i41-63o
Rv2563	PROBABLE GLUTAMINE-TRANSPORT TRANSMEMBRANE PROTEIN ABC TRANSPORTER	0.973	0.52	44-45	Not cytoplasm	Not extracellular	plasma membrane	Plasma membrane	CytoplasmicMembrane	Rv2563 4 0 i16-37o230-253i274-300o312-334i	ExpAA=92.53	First60=22.37	PredHel=4	Topology=i16-38o231-253i274-296o306-328i			x
Rv2576c	POSSIBLE CONSERVED MEMBRANE PROTEIN	0.918	0.843	45-46	Not cytoplasm	Not extracellular	Not plasma membrane	Extracell	Unknown	Rv2576c 1 0 o20-43i	ExpAA=21.66	First60=21.04	PredHel=1	Topology=o20-42i			x
Rv2585c	POSSIBLE CONSERVED LIPOPROTEIN	1	0.419	36-37	Not cytoplasm	Not extracellular	plasma membrane	Cytoplasm	Unknown	Rv2585c 0 Y n16-31c36/37o	ExpAA=16.23	First60=16.01	PredHel=0	Topology=o	x
Rv2597	PROBABLE MEMBRANE PROTEIN	0.925	0.352	23-24	Not cytoplasm	Not extracellular	plasma membrane	Cytoplasm	Unknown	Rv2597 0 Y n4-15c23/24o	ExpAA=20.95	First60=20.94	PredHel=1	Topology=i2-24o
Rv2599	PROBABLE CONSERVED MEMBRANE PROTEIN	0.998	0.544	24-25	Not cytoplasm	Not extracellular	plasma membrane	Extracell	Unknown	Rv2599 0 Y n6-17c24/25o	ExpAA=22.05	First60=21.99	PredHel=1	Topology=i7-29o			x
Rv2608	PPE FAMILY PROTEIN	0.515	0.268	40-41	Not cytoplasm	Not extracellular	plasma membrane	Extracell	Unknown	Rv2608 0 0 i	ExpAA=1.96	First60=1.41	PredHel=0	Topology=o
Rv2609c	PROBABLE CONSERVED MEMBRANE PROTEIN	0.808	0.699	22-23	cytoplasm	Not extracellular	Not plasma membrane	Cytoplasm	Cytoplasmic	Rv2609c 0 Y n4-15c19/20o	ExpAA=22.03	First60=21.49	PredHel=1	Topology=i2-24o
Rv2612c	PROBABLE PI SYNTHASE PGSA1 (PHOSPHATIDYLINOSITOL SYNTHASE) (CDP-DIACYLGLYCEROL--INOSITOL3-PHOSPHATIDYLTRANSFERASE)	0.808	0.631	56-57	Not cytoplasm	Not extracellular	plasma membrane	Plasma membrane	CytoplasmicMembrane	Rv2612c 6 0 i28-49o55-74i95-112o118-136i156-173o179-200i	ExpAA=71.44	First60=23.84	PredHel=3	Topology=o45-67i117-134o170-192i			x
Rv2615c	PE-PGRS FAMILY PROTEIN	0.849	0.796	33-34	Not cytoplasm	Not extracellular	plasma membrane	Extracell	Extracellular	Rv2615c 0 0 i	ExpAA=0.04	First60=0.01	PredHel=0	Topology=o			x
Rv2625c	PROBABLE CONSERVED TRANSMEMBRANE ALANINE AND LEUCINE RICH PROTEIN	0.571	0.571	42-43	Not cytoplasm	Not extracellular	plasma membrane	Plasma membrane	CytoplasmicMembrane	Rv2625c 6 0 i12-33o45-65i77-96o108-130i137-159o194-226i	ExpAA=133.77	First60=38.35	PredHel=6	Topology=i13-35o45-64i77-99o109-131i138-160o207-229i			x
Rv2640c	POSSIBLE TRANSCRIPTIONAL REGULATORY PROTEIN (PROBABLY ARSR-FAMILY)	0.512	0.26	27-28	cytoplasm	Not extracellular	Not plasma membrane	Plasma membrane	Unknown	Rv2640c 0 0 i	ExpAA=0.04	First60=0.04	PredHel=0	Topology=o
Rv2654c	POSSIBLE phiRv2 PROPHAGE PROTEIN	0.585	0.485	28-29	Not cytoplasm	Not extracellular	Not plasma membrane	Extracell	Unknown	Rv2654c 0 0 i	ExpAA=11.36	First60=3.65	PredHel=0	Topology=o
Rv2668	POSSIBLE EXPORTED ALANINE AND VALINE RICH PROTEIN	1	0.654	29-30	No Prediction	No Prediction	No Prediction	Cytoplasm	Unknown	Rv2668 0 Y n5-16c21/22o	ExpAA=14.63	First60=13.29	PredHel=0	Topology=o
Rv2672	POSSIBLE SECRETED PROTEASE	1	0.856	35-36	Not cytoplasm	Not extracellular	plasma membrane	Plasma membrane	Unknown	Rv2672 0 Y n17-30c35/36o	ExpAA=21.90	First60=21.34	PredHel=1	Topology=i13-35o			x
Rv2693c	PROBABLE CONSERVED INTEGRAL MEMBRANE ALANINE AND LEUCINE RICH PROTEIN	0.901	0.683	37-38	Not cytoplasm	Not extracellular	plasma membrane	Plasma membrane	CytoplasmicMembrane	Rv2693c 6 0 i12-34o40-60i67-85o91-112i137-158o170-194i	ExpAA=131.67	First60=44.85	PredHel=6	Topology=i12-34o38-60i67-86o90-112i137-159o172-194i			x
Rv2700	POSSIBLE CONSERVED SECRETED ALANINE RICH PROTEIN	0.737	0.558	54-55	cytoplasm	Not extracellular	plasma membrane	Plasma membrane	Unknown	Rv2700 1 0 i26-44o	ExpAA=20.27	First60=20.18	PredHel=1	Topology=i26-45o			x
Rv2712c	HYPOTHETICAL PROTEIN	0.51	0.428	38-39	No Prediction	No Prediction	No Prediction	Plasma membrane	Cytoplasmic	Rv2712c 0 0 i	ExpAA=2.84	First60=2.73	PredHel=0	Topology=o
Rv2721c	POSSIBLE CONSERVED TRANSMEMBRANE ALANINE AND GLYCINE RICH PROTEIN	1	0.967	35-36	Not cytoplasm	extracellular	plasma membrane	Cytoplasm	Cellwall	Rv2721c 1 Y n15-30c35/36o422-445i	ExpAA=44.92	First60=21.65	PredHel=2	Topology=i13-35o420-442i	x		x
Rv2728c	CONSERVED HYPOTHETICAL ALANINE RICH PROTEIN	0.671	0.426	21-22	cytoplasm	Not extracellular	plasma membrane	Plasma membrane	Unknown	Rv2728c 0 Y n4-15c23/24o	ExpAA=0.41	First60=0.39	PredHel=0	Topology=o
Rv2729c	PROBABLE CONSERVED INTEGRAL MEMBRANE ALANINE VALINE AND LEUCINE RICH PROTEIN	0.816	0.47	29-30	Not cytoplasm	Not extracellular	plasma membrane	Plasma membrane	CytoplasmicMembrane	Rv2729c 9 0 o6-25i51-70o76-95i107-129o135-156i163-182o194-216i223-246o258-278i	ExpAA=188.85	First60=31.76	PredHel=9	Topology=o4-23i52-71o76-95i107-129o134-156i163-182o197-216i223-245o255-277i			x
Rv2741	PE-PGRS FAMILY PROTEIN	0.996	0.402	30-31	Not cytoplasm	Not extracellular	plasma membrane	Extracell	Extracellular	Rv2741 0 Y n4-15c33/34o	ExpAA=11.05	First60=1.61	PredHel=0	Topology=o			x
Rv2766c	PROBABLE SHORT-CHAIN TYPE DEHYDROGENASE/REDUCTASE	0.665	0.379	30-31	cytoplasm	Not extracellular	Not plasma membrane	Plasma membrane	Cytoplasmic	Rv2766c 0 0 i	ExpAA=2.62	First60=1.02	PredHel=0	Topology=o
Rv2772c	PROBABLE CONSERVED TRANSMEMBRANE PROTEIN	0.998	0.777	41-42	Not cytoplasm	extracellular	plasma membrane	Cytoplasm	Cytoplasmic	Rv2772c 2 0 o6-27i39-60o	ExpAA=45.16	First60=43.41	PredHel=2	Topology=i7-29o39-61i			x
Rv2781c	POSSIBLE ALANINE RICH OXIDOREDUCTASE	0.916	0.773	27-28	Not cytoplasm	Not extracellular	Not plasma membrane	Plasma membrane	Unknown	Rv2781c 0 0 i	ExpAA=5.53	First60=3.73	PredHel=0	Topology=o
Rv2784c	PROBABLE LIPOPROTEIN LPPU	0.824	0.519	22-23	No Prediction	No Prediction	No Prediction	Extracell	Unknown	Rv2784c 0 Y n5-16c21/22o	ExpAA=5.60	First60=5.59	PredHel=0	Topology=o		x	x
Rv2796c	PROBABLE CONSERVED LIPOPROTEIN LPPV	0.971	0.72	29-30	Not cytoplasm	Not extracellular	plasma membrane	Cytoplasm	Cytoplasmic	Rv2796c 0 Y n5-16c28/29o	ExpAA=4.06	First60=3.74	PredHel=0	Topology=o		x
Rv2799	PROBABLE MEMBRANE PROTEIN	0.571	0.231	59-60	cytoplasm	Not extracellular	Not plasma membrane	Extracell	Unknown	Rv2799 1 0 i21-40o	ExpAA=22.32	First60=22.00	PredHel=1	Topology=i21-43o			x
Rv2806	POSSIBLE MEMBRANE PROTEIN	0.817	0.454	29-30	No Prediction	No Prediction	No Prediction	Plasma membrane	Unknown	Rv2806 2 0 i7-27o33-51i	ExpAA=42.94	First60=42.94	PredHel=2	Topology=i7-29o33-55i			x
Rv2833c	PROBABLE Sn-GLYCEROL-3-PHOSPHATE-BINDING LIPOPROTEIN UGPB	1	0.917	34-35	Not cytoplasm	Not extracellular	plasma membrane	Extracell	Unknown	Rv2833c 0 Y n9-20c25/26o	ExpAA=13.16	First60=12.82	PredHel=0	Topology=o	x	x
Rv2834c	PROBABLE Sn-GLYCEROL-3-PHOSPHATE TRANSPORT INTEGRAL MEMBRANE PROTEIN ABC TRANSPORTER UGPE	0.989	0.989	42-43	Not cytoplasm	Not extracellular	plasma membrane	Plasma membrane	CytoplasmicMembrane	Rv2834c 6 0 i12-31o74-98i105-129o141-159i180-202o239-260i	ExpAA=133.70	First60=22.48	PredHel=6	Topology=i12-34o75-97i104-123o138-160i180-202o238-260i			x
Rv2843	PROBABLE CONSERVED TRANSMEMBRANE ALANINE RICH PROTEIN	1	0.32	28-29	Not cytoplasm	extracellular	Not plasma membrane	Extracell	CytoplasmicMembrane	Rv2843 0 Y n20-31c36/37o	ExpAA=61.76	First60=21.34	PredHel=2	Topology=i20-42o62-84i		x	x
Rv2864c	POSSIBLE PENICILLIN-BINDING LIPOPROTEIN	1	0.711	51-52	Not cytoplasm	Not extracellular	plasma membrane	Cytoplasm	CytoplasmicMembrane	Rv2864c 0 Y n7-18c23/24o	ExpAA=10.07	First60=9.90	PredHel=0	Topology=o		x
Rv2873	CELL SURFACE LIPOPROTEIN MPT83 (LIPOPROTEIN P23)	1	0.748	53-54	Not cytoplasm	Not extracellular	plasma membrane	Extracell	Extracellular	Rv2873 0 Y n9-22c27/28o	ExpAA=8.74	First60=4.35	PredHel=0	Topology=o		x
Rv2874	POSSIBLE INTEGRAL MEMBRANE C-TYPE CYTOCHROME BIOGENESIS PROTEIN DIPZ	0.716	0.628	30-31	Not cytoplasm	Not extracellular	plasma membrane	Plasma membrane	CytoplasmicMembrane	Rv2874 7 0 i114-131o137-155i176-200o206-227i248-274o280-304i325-346o	ExpAA=132.04	First60=0.05	PredHel=5	Topology=i117-139o178-200i250-272o282-304i325-347o	x		x
Rv2875	MAJOR SECRETED IMMUNOGENIC PROTEIN MPT70	1	0.781	30-31	Not cytoplasm	extracellular	Not plasma membrane	Extracell	Extracellular	Rv2875 0 Y n7-22c30/31o	ExpAA=19.81	First60=19.61	PredHel=1	Topology=i7-29o			x
Rv2877c	PROBABLE CONSERVED INTEGRAL MEMBRANE PROTEIN	0.706	0.31	24-25	Not cytoplasm	Not extracellular	plasma membrane	Plasma membrane	CytoplasmicMembrane	Rv2877c 7 0 o6-32i53-78o84-105i135-157o169-192i204-225o262-282i	ExpAA=160.31	First60=32.59	PredHel=7	Topology=o10-32i52-74o84-106i130-152o162-184i204-226o261-283i			x
Rv2878c	SOLUBLE SECRETED ANTIGEN MPT53 PRECURSOR	1	0.818	37-38	Not cytoplasm	extracellular	Not plasma membrane	Extracell	Extracellular	Rv2878c 1 0 i12-30o	ExpAA=21.09	First60=20.93	PredHel=1	Topology=o15-37i			x
Rv2891	CONSERVED HYPOTHETICAL PROTEIN	1	1	36-37	Not cytoplasm	extracellular	Not plasma membrane	Cytoplasm	Unknown	Rv2891 0 Y n20-31c36/37o	ExpAA=21.86	First60=13.50	PredHel=0	Topology=o
Rv2905	PROBABLE CONSERVED ALANINE RICH LIPOPROTEIN LPPW	1	0.949	29-30	Not cytoplasm	Not extracellular	plasma membrane	Cytoplasm	Cytoplasmic	Rv2905 0 Y n6-17c25/26o	ExpAA=2.91	First60=2.90	PredHel=0	Topology=o		x
Rv2911	PROBABLE D-ALANYL-D-ALANINE CARBOXYPEPTIDASE DACB2 (PENICILLIN-BINDING PROTEIN) (DD-PEPTIDASE) (DD-CARBOXYPEPTIDASE) (PBP) (DD-TRANSPEPTIDASE)	1	0.964	25-26	Not cytoplasm	Not extracellular	plasma membrane	Plasma membrane	Unknown	Rv2911 0 Y n6-17c25/26o	ExpAA=4.03	First60=3.96	PredHel=0	Topology=o
Rv2945c	PROBABLE CONSERVED LIPOPROTEIN LPPX	0.999	0.608	34-35	Not cytoplasm	Not extracellular	plasma membrane	Cytoplasm	CytoplasmicMembrane	Rv2945c 0 Y n7-22c27/28o	ExpAA=18.01	First60=18.00	PredHel=1	Topology=i7-24o		x	x
Rv2959c	POSSIBLE METHYLTRANSFERASE (METHYLASE	0.527	0.354	26-27	Not cytoplasm	Not extracellular	plasma membrane	Cytoplasm	Cytoplasmic	Rv2959c 0 Y n11-22c26/27o	ExpAA=1.97	First60=1.91	PredHel=0	Topology=o
Rv2960c	HYPOTHETICAL PROT	0.645	0.591	23-24	No Prediction	No Prediction	No Prediction	Cytoplasm	Unknown	Rv2960c 0 Y n5-16c23/24o	ExpAA=0.70	First60=0.70	PredHel=0	Topology=o
Rv2972c	POSSIBLE CONSERVED MEMBRANE OR EXPORTED PROTEIN	0.999	0.321	27-28	No Prediction	No Prediction	No Prediction	Extracell	Unknown	Rv2972c 0 Y n5-15c20/21o	ExpAA=28.03	First60=27.97	PredHel=1	Topology=i7-29o			x
Rv2980	POSSIBLE CONSERVED SECRETED PROTEIN	0.973	0.241	31-32	Not cytoplasm	Not extracellular	plasma membrane	Cytoplasm	Unknown	Rv2980 1 0 o12-32i	ExpAA=22.33	First60=22.27	PredHel=1	Topology=o10-32i			x
Rv2982c	PROBABLE GLYCEROL-3-PHOSPHATE DEHYDROGENASE [NAD(P)+] GPDA2 (NAD(P)H- DEPENDENT GLYCEROL-3-PHOSPHATE DEHYDROGENASE)	0.899	0.799	25-26	cytoplasm	Not extracellular	Not plasma membrane	Plasma membrane	CytoplasmicMembrane	Rv2982c 0 Y n2-13c21/22o	ExpAA=10.05	First60=2.37	PredHel=0	Topology=o
Rv2985	POSSIBLE HYDROLASE MUTT1	0.538	0.504	32-33	cytoplasm	Not extracellular	Not plasma membrane	Cytoplasm	Cytoplasmic	Rv2985 0 0 i	ExpAA=0.21	First60=0.12	PredHel=0	Topology=o	x
Rv2999	PROBABLE CONSERVED LIPOPROTEIN LPPY	0.992	0.583	32-33	Not cytoplasm	Not extracellular	Not plasma membrane	Cytoplasm	Unknown	Rv2999 0 Y n10-21c26/27o	ExpAA=4.74	First60=4.65	PredHel=0	Topology=o	x	x
Rv3004	LOW MOLECULAR WEIGHT PROTEIN ANTIGEN 6 (CFP-6)	0.991	0.801	34-35	Not cytoplasm	extracellular	Not plasma membrane	Cytoplasm	Extracellular	Rv3004 0 Y n4-15c19/20o	ExpAA=23.80	First60=23.79	PredHel=1	Topology=o15-37i			x
Rv3006	PROBABLE CONSERVED LIPOPROTEIN LPPZ	0.995	0.467	32-33	Not cytoplasm	Not extracellular	Not plasma membrane	Extracell	Unknown	Rv3006 0 Y n10-20c25/26o	ExpAA=1.42	First60=1.38	PredHel=0	Topology=o			x
Rv3016	PROBABLE LIPOPROTEIN LPQA	0.998	0.723	30-31	No Prediction	No Prediction	No Prediction	Cytoplasm	Cytoplasmic	Rv3016 0 Y n8-20c25/26o	ExpAA=6.69	First60=6.62	PredHel=0	Topology=o
Rv3033	HYPOTHETICAL PROTEIN	0.999	0.366	34-35	Not cytoplasm	extracellular	Not plasma membrane	Cytoplasm	Unknown	Rv3033 0 Y n8-19c26/27o	ExpAA=8.27	First60=8.26	PredHel=0	Topology=o		x
Rv3034c	POSSIBLE TRANSFERASE	0.962	0.933	25-26	cytoplasm	Not extracellular	Not plasma membrane	Cytoplasm	Unknown	Rv3034c 0 0 i	ExpAA=0.51	First60=0.39	PredHel=0	Topology=o	x
Rv3036c	PROBABLE CONSERVED SECRETED PROTEIN TB22.2	1	0.613	36-37	Not cytoplasm	extracellular	Not plasma membrane	Extracell	Extracellular	Rv3036c 0 Y n4-15c22/23o	ExpAA=15.20	First60=15.15	PredHel=0	Topology=o			x
Rv3044	PROBABLE FEIII-DICITRATE-BINDING PERIPLASMIC LIPOPROTEIN FECB	0.992	0.422	21-22	Not cytoplasm	Not extracellular	plasma membrane	Plasma membrane	Unknown	Rv3044 0 Y n5-16c21/22o	ExpAA=1.01	First60=1.00	PredHel=0	Topology=o		x
Rv3067	CONSERVED HYPOTHETICAL PROTEIN	0.74	0.348	30-31	cytoplasm	Not extracellular	Not plasma membrane	Extracell	Unknown	Rv3067 0 Y n4-15c20/21o	ExpAA=10.34	First60=10.33	PredHel=0	Topology=o			x
Rv3069	PROBABLE CONSERVED TRANSMEMBRANE PROTEIN	0.979	0.856	30-31	Not cytoplasm	Not extracellular	plasma membrane	Plasma membrane	CytoplasmicMembrane	Rv3069 3 Y n9-22c30/31o40-60i72-89o101-125i	ExpAA=84.85	First60=42.39	PredHel=4	Topology=i9-31o35-57i70-92o102-124i	x		x
Rv3078	PROBABLE HYDROXYLAMINOBENZENE MUTASE HAB	0.999	0.516	34-35	Not cytoplasm	Not extracellular	plasma membrane	Plasma membrane	CytoplasmicMembrane	Rv3078 4 0 o6-27i39-56o62-89i110-131o	ExpAA=88.36	First60=42.29	PredHel=4	Topology=o4-26i39-56o66-88i109-131o			x
Rv3084	PROBABLE ACETYL-HYDROLASE/ESTERASE LIPR	0.749	0.418	40-41	cytoplasm	Not extracellular	Not plasma membrane	Cytoplasm	Cytoplasmic	Rv3084 0 0 i	ExpAA=0.55	First60=0.08	PredHel=0	Topology=o
Rv3090	HYPOTHETICAL ALANINE AND VALINE RICH PROTEIN	0.878	0.806	34-35	No Prediction	No Prediction	No Prediction	Cytoplasm	Unknown	Rv3090 2 0 o6-24i36-57o	ExpAA=42.75	First60=42.63	PredHel=2	Topology=o5-24i37-59o			x
Rv3096	CONSERVED HYPOTHETICAL PROTEIN	1	0.899	27-28	Not cytoplasm	Not extracellular	Not plasma membrane	Cytoplasm	Unknown	Rv3096 0 Y n9-19c27/28o	ExpAA=0.19	First60=0.18	PredHel=0	Topology=o
Rv3097c	PE-PGRS FAMILY PROTEIN, PROBABLY TRIACYLGLYCEROL LIPASE	0.697	0.305	42-43	Not cytoplasm	Not extracellular	plasma membrane	Extracell	Unknown	Rv3097c 0 0 i	ExpAA=0.68	First60=0.37	PredHel=0	Topology=o
Rv3101c	PUTATIVE CELL DIVISION PROTEIN FTSX (SEPTATION COMPONENT-TRANSPORT INTEGRAL MEMBRANE PROTEIN ABC TRANSPORTER)	0.754	0.58	45-46	Not cytoplasm	Not extracellular	plasma membrane	Plasma membrane	CytoplasmicMembrane	Rv3101c 4 0 i21-45o172-197i218-246o266-291i	ExpAA=91.22	First60=22.84	PredHel=4	Topology=o20-42i174-196o225-247i268-290o			x
Rv3106	NADPH:ADRENODOXIN OXIDOREDUCTASE FPRA (NADPH-FERREDOXIN REDUCTASE)	0.998	0.997	25-26	cytoplasm	Not extracellular	Not plasma membrane	Cytoplasm	Cytoplasmic	Rv3106 0 Y n6-17c25/26o	ExpAA=2.30	First60=2.30	PredHel=0	Topology=o
Rv3144c	PPE-FAMILY PROT	0.639	0.182	30-31	Not cytoplasm	Not extracellular	plasma membrane	Extracell	CytoplasmicMembrane	Rv3144c 0 0 i	ExpAA=11.17	First60=5.49	PredHel=0	Topology=o
Rv3145	PROBABLE NADH DEHYDROGENASE I (CHAIN A) NUOA (NADH-UBIQUINONE OXIDOREDUCTASE CHAIN A)	0.998	0.855	25-26	Not cytoplasm	Not extracellular	plasma membrane	Plasma membrane	CytoplasmicMembrane	Rv3145 3 0 o6-28i70-91o97-119i	ExpAA=67.85	First60=23.04	PredHel=3	Topology=o5-27i70-92o97-119i			x
Rv3157	PROBABLE NADH DEHYDROGENASE I (CHAIN M) NUOK	0.637	0.43	32-33	Not cytoplasm	Not extracellular	plasma membrane	Plasma membrane	CytoplasmicMembrane	Rv3157 14 0 o6-24i31-52o72-100i140-159o165-185i197-218o246-265i285-307o313-335i342-361o373-391i411-434o446	ExpAA=302.27	First60=41.94	PredHel=14	Topology=o5-24i31-53o83-105i140-159o163-185i197-219o246-268i281-303o313-335i342-364o369-391i411-433o443-465i486-508o			x
Rv3158	PROBABLE NADH DEHYDROGENASE I (CHAIN M) NUOK (NADH-UBIQUINONE OXIDOREDUCTASE CHAIN M)	0.579	0.535	31-32	Not cytoplasm	Not extracellular	plasma membrane	Plasma membrane	CytoplasmicMembrane	Rv3158 13 0 o12-33i45-64o84-101i152-169o175-195i207-229o249-273i285-306o318-337i344-362o368-392i418-440o452	ExpAA=294.86	First60=42.61	PredHel=14	Topology=o10-32i39-61o76-98i151-168o172-194i207-229o249-271i284-306o316-338i345-362o372-394i418-440o450-472i493-515o			x
Rv3159c	PPE FAMILY PROTEIN	0.538	0.41	41-42	Not cytoplasm	Not extracellular	plasma membrane	Extracell	Extracellular	Rv3159c 0 0 i	ExpAA=3.17	First60=1.20	PredHel=0	Topology=o			x
Rv3162c	POSSIBLE INTEGRAL MEMBRANE PROTEIN	0.889	0.198	32-33	Not cytoplasm	Not extracellular	plasma membrane	Extracell	CytoplasmicMembrane	Rv3162c 5 0 o15-40i47-66o72-91i98-117o123-139i	ExpAA=102.70	First60=37.83	PredHel=5	Topology=o15-37i44-66o70-87i94-116o121-140i	x		x
Rv3163c	POSSIBLE CONSERVED SECRETED PROTEIN	0.909	0.836	43-44	No Prediction	No Prediction	No Prediction	Cytoplasm	Cytoplasmic	Rv3163c 1 Y n13-24c29/30o39-55i	ExpAA=26.04	First60=23.64	PredHel=1	Topology=i13-35o	x
Rv3166c	CONSERVED HYPOTHETICAL PROTEIN	0.792	0.231	43-44	Not cytoplasm	Not extracellular	plasma membrane	Plasma membrane	CytoplasmicMembrane	Rv3166c 4 0 i12-29o49-70i101-124o161-182i	ExpAA=88.68	First60=33.38	PredHel=4	Topology=i12-34o49-71i101-123o161-183i			x
Rv3193c	PROBABLE CONSERVED TRANSMEMBRANE PROTEIN	1	0.999	39-40	Not cytoplasm	Not extracellular	plasma membrane	Cytoplasm	CytoplasmicMembrane	Rv3193c 6 Y n18-31c39/40o63-85i111-134o170-192i212-229o260-279i286-306o	ExpAA=152.53	First60=22.39	PredHel=7	Topology=i17-39o59-81i113-135o169-191i212-229o255-277i284-306o			x
Rv3194c	POSSIBLE CONSERVED SECRETED PROTEIN	0.999	0.725	33-34	Not cytoplasm	Not extracellular	plasma membrane	Cytoplasm	Unknown	Rv3194c 0 Y n5-18c23/24o	ExpAA=23.03	First60=22.92	PredHel=1	Topology=i5-27o
Rv3207c	CONSERVED HYPOTHETICAL PROTEIN	0.752	0.486	37-38	cytoplasm	Not extracellular	Not plasma membrane	Extracell	Unknown	Rv3207c 1 0 o6-23i	ExpAA=19.22	First60=19.21	PredHel=1	Topology=i5-27o			x
Rv3212	CONSERVED HYPOTHETICAL ALANINE VALINE RICH PROTEIN	0.99	0.407	37-38	Not cytoplasm	Not extracellular	Not plasma membrane	Extracell	CytoplasmicMembrane	Rv3212 1 0 i12-31o	ExpAA=20.99	First60=20.75	PredHel=1	Topology=i12-31o
Rv3217c	PROBABLE CONSERVED INTEGRAL MEMBRANE PROTEIN	0.797	0.484	28-29	Not cytoplasm	Not extracellular	plasma membrane	Plasma membrane	CytoplasmicMembrane	Rv3217c 4 0 i12-36o48-68i75-93o99-117i	ExpAA=86.88	First60=38.06	PredHel=4	Topology=i13-32o42-64i71-93o99-121i			x
Rv3236c	PROBABLE CONSERVED INTEGRAL MEMBRANE TRANSPORT PROTEIN	0.773	0.386	29-30	Not cytoplasm	Not extracellular	plasma membrane	Plasma membrane	CytoplasmicMembrane	Rv3236c 11 0 o6-24i36-54o60-78i90-111o117-137i149-172o178-198i218-251o290-312i324-345o351-370i	ExpAA=217.10	First60=45.35	PredHel=10	Topology=i7-29o33-55i57-79o115-137i150-172o176-198i219-241o291-313i334-356o360-382i			x
Rv3243c	HYPOTHETICAL PROTEIN	0.993	0.861	39-40	cytoplasm	Not extracellular	Not plasma membrane	Cytoplasm	Unknown	Rv3243c 0 Y n20-32c41/42o	ExpAA=10.98	First60=10.97	PredHel=0	Topology=o
Rv3244c	PROBABLE CONSERVED LIPOPROTEIN LPQB	1	0.676	27-28	No Prediction	No Prediction	No Prediction	Cytoplasm	Unknown	Rv3244c 0 Y n3-14c23/24o	ExpAA=2.84	First60=2.83	PredHel=0	Topology=o
Rv3245c	TWO COMPONENT SENSORY TRANSDUCTION HISTIDINE KINASE MTRB	0.955	0.545	62-63	Not cytoplasm	Not extracellular	plasma membrane	Cytoplasm	CytoplasmicMembrane	Rv3245c 1 Y n42-57c62/63o210-233i	ExpAA=44.14	First60=19.95	PredHel=1	Topology=i40-62o	x
Rv3261	PROBABLE F420 BIOSYNTHESIS PROTEIN FBIA	0.895	0.856	35-36	cytoplasm	Not extracellular	Not plasma membrane	Cytoplasm	Cytoplasmic	Rv3261 0 0 i	ExpAA=0.92	First60=0.69	PredHel=0	Topology=o
Rv3267	CONSERVED HYPOTHETICAL PROTEIN (CPSA-RELATED PROTEIN)	0.992	0.844	34-35	Not cytoplasm	Not extracellular	plasma membrane	Cytoplasm	Unknown	Rv3267 0 Y n16-27c32/33o	ExpAA=21.02	First60=21.01	PredHel=1	Topology=i13-35o
Rv3296	PROBABLE ATP-DEPENDENT HELICASE LHR (LARGE HELICASE-RELATED PROTEIN)	0.87	0.548	36-37	Not cytoplasm	Not extracellular	Not plasma membrane	Cytoplasm	CytoplasmicMembrane	Rv3296 0 0 i	ExpAA=2.31	First60=0.13	PredHel=0	Topology=o
Rv3298c	POSSIBLE ESTERASE LIPOPROTEIN LPQC	0.992	0.45	29-30	Not cytoplasm	extracellular	Not plasma membrane	Cytoplasm	Unknown	Rv3298c 0 Y n7-17c21/22o	ExpAA=7.59	First60=7.45	PredHel=0	Topology=o		x
Rv3310	ACID PHOSPHATASE (ACID PHOSPHOMONOESTERASE) (PHOSPHOMONOESTERASE) (GLYCEROPHOSPHATASE)	1	0.51	46-47	Not cytoplasm	extracellular	Not plasma membrane	Extracell	CytoplasmicMembrane	Rv3310 0 Y n18-31c43/44o	ExpAA=23.21	First60=22.98	PredHel=1	Topology=i21-43o			x
Rv3330	PROBABLE PENICILLIN-BINDING PROTEIN DACB1 (D-ALANYL-D-ALANINE CARBOXYPEPTIDASE) (DD-PEPTIDASE) (DD-CARBOXYPEPTIDASE) (PBP)	1	0.428	32-33	Not cytoplasm	Not extracellular	plasma membrane	Plasma membrane	CytoplasmicMembrane	Rv3330 1 Y n6-17c35/36o375-396i	ExpAA=32.39	First60=10.48	PredHel=1	Topology=o374-396i	x
Rv3333c	HYPOTHETICAL PROLINE RICH PROTEIN	1	0.899	32-33	Not cytoplasm	Not extracellular	Not plasma membrane	Extracell	Unknown	Rv3333c 0 Y n9-20c32/33o	ExpAA=17.62	First60=17.40	PredHel=0	Topology=o
Rv3345c	PE-PGRS FAMILY PROTEIN	0.915	0.583	33-34	Not cytoplasm	Not extracellular	Not plasma membrane	Extracell	Extracellular	Rv3345c 0 Y n11-22c31/32o	ExpAA=0.20	First60=0.10	PredHel=0	Topology=o			x
Rv3354	CONSERVED HYPOTHETICAL PROTEIN	1	0.99	32-33	Not cytoplasm	Not extracellular	plasma membrane	Extracell	CytoplasmicMembrane	Rv3354 0 Y n13-24c32/33o	ExpAA=20.27	First60=17.45	PredHel=1	Topology=i13-35o	x		x
Rv3365c	CONSERVED HYPOTHETICAL PROTEIN	0.759	0.676	27-28	Not cytoplasm	Not extracellular	Not plasma membrane	Cytoplasm	CytoplasmicMembrane	Rv3365c 2 Y n8-15c27/28o43-64i322-344o	ExpAA=43.69	First60=14.98	PredHel=2	Topology=o47-64i322-344o
Rv3367	PE-PGRS FAMILY PROTEIN	0.978	0.8	33-34	Not cytoplasm	Not extracellular	plasma membrane	Extracell	Extracellular	Rv3367 0 Y n4-15c33/34o	ExpAA=0.41	First60=0.36	PredHel=0	Topology=o			x
Rv3388	PE-PGRS FAMILY PROTEIN	0.968	0.455	32-33	Not cytoplasm	Not extracellular	Not plasma membrane	Extracell	Extracellular	Rv3388 0 Y n11-21c33/34o	ExpAA=0.25	First60=0.20	PredHel=0	Topology=o			x
Rv3390	PROBABLE CONSERVED LIPOPROTEIN LPQD	1	0.6	49-50	Not cytoplasm	Not extracellular	Not plasma membrane	Extracell	CytoplasmicMembrane	Rv3390 0 Y n10-23c27/28o	ExpAA=19.24	First60=18.87	PredHel=1	Topology=i13-32o		x	x
Rv3394c	CONSERVED HYPOTHETICAL PROTEIN	0.958	0.67	42-43	cytoplasm	Not extracellular	Not plasma membrane	Cytoplasm	Cytoplasmic	Rv3394c 0 Y n17-28c37/38o	ExpAA=11.72	First60=11.70	PredHel=0	Topology=o
Rv3395c	CONSERVED HYPOTHETICAL PROTEIN	0.84	0.438	51-52	cytoplasm	Not extracellular	Not plasma membrane	Cytoplasm	Unknown	Rv3395c 0 Y n3-11c20/21o	ExpAA=1.04	First60=0.02	PredHel=0	Topology=o	x
Rv3435	PROBABLE CONSERVED TRANSMEMBRANE PROTEIN	0.569	0.228	31-32	Not cytoplasm	extracellular	Not plasma membrane	Cytoplasm	CytoplasmicMembrane	Rv3435c 4 0 i7-25o186-208i220-239o245-274i	ExpAA=84.11	First60=21.56	PredHel=4	Topology=i7-29o186-208i221-239o254-276i
Rv3449	PROBABLE MEMBRANE-ANCHORED MYCOSIN MYCP4 (SERINE PROTEASE) (SUBTILISIN-LIKE PROTEASE) (SUBTILASE-LIKE) (MYCOSIN-4)	1	1	28-29	Not cytoplasm	extracellular	Not plasma membrane	Plasma membrane	Extracellular	Rv3449 1 Y n9-20c28/29o419-439i	ExpAA=40.36	First60=15.70	PredHel=2	Topology=i7-29o419-441i			x
Rv3451	PROBABLE CUTINASE PRECURSOR CUT3	1	0.996	26-27	Not cytoplasm	extracellular	Not plasma membrane	Extracell	Unknown	Rv3451 0 Y n3-21c26/27o	ExpAA=22.84	First60=21.16	PredHel=1	Topology=i2-24o			x
Rv3452	PROBABLE CUTINASE PRECURSOR CUT4	1	0.55	45-46	Not cytoplasm	extracellular	Not plasma membrane	Extracell	Unknown	Rv3452 0 Y n20-35c45/46o	ExpAA=19.43	First60=19.16	PredHel=1	Topology=i20-39o	x		x
Rv3468c	POSSIBLE DTDP-GLUCOSE 4,6-DEHYDRATASE	0.825	0.76	31-32	Not cytoplasm	Not extracellular	plasma membrane	Cytoplasm	Unknown	Rv3468c 0 0 i	ExpAA=0.10	First60=0.07	PredHel=0	Topology=o	x
Rv3481c	PROBABLE INTEGRAL MEMBRANE PROTEIN	0.845	0.512	41-42	Not cytoplasm	Not extracellular	Not plasma membrane	Plasma membrane	CytoplasmicMembrane	Rv3481c 6 0 o12-37i49-73o85-104i125-151o163-186i207-226o	ExpAA=139.92	First60=34.90	PredHel=6	Topology=o15-37i50-72o82-104i131-153o163-185i206-228o			x
Rv3484	POSSIBLE CONSERVED PROTEIN CPSA	0.941	0.443	49-50	Not cytoplasm	Not extracellular	plasma membrane	Extracell	Unknown	Rv3484 1 0 i28-47o	ExpAA=21.79	First60=21.78	PredHel=1	Topology=i24-46o
Rv3491	HYPOTHETICAL PROTEIN	0.999	0.697	31-32	No Prediction	No Prediction	No Prediction	Extracell	Unknown	Rv3491 0 Y n5-23c31/32o	ExpAA=18.79	First60=18.47	PredHel=1	Topology=i7-26o			x
Rv3492c	CONSERVED HYPOTHETICAL MCE ASSOCIATED PROTEIN	0.967	0.826	21-22	cytoplasm	Not extracellular	plasma membrane	Cytoplasm	Unknown	Rv3492c 1 0 i7-28o	ExpAA=22.42	First60=22.42	PredHel=1	Topology=i5-27o
Rv3494c	MCE-FAMILY PROTEIN MCE4F	0.554	0.234	44-45	Not cytoplasm	extracellular	Not plasma membrane	Extracell	CytoplasmicMembrane	Rv3494c 1 0 i12-31o	ExpAA=32.71	First60=26.54	PredHel=1	Topology=i12-34o			x
Rv3495c	POSSIBLE MCE-FAMILY LIPOPROTEIN LPRN (MCE-FAMILY LIPOPROTEIN MCE4E)	0.997	0.336	41-42	Not cytoplasm	Not extracellular	Not plasma membrane	Cytoplasm	Unknown	Rv3495c 0 Y n8-18c23/24o	ExpAA=6.03	First60=6.01	PredHel=0	Topology=o		x
Rv3497c	MCE-FAMILY PROTEIN MCE4C	0.939	0.922	34-35	cytoplasm	Not extracellular	Not plasma membrane	Cytoplasm	Unknown	Rv3497c 1 0 i20-41o	ExpAA=25.28	First60=22.87	PredHel=1	Topology=i19-41o
Rv3498c	MCE-FAMILY PROTEIN MCE4B	0.986	0.578	35-36	Not cytoplasm	Not extracellular	plasma membrane	Cytoplasm	Unknown	Rv3498c 1 0 i12-34o	ExpAA=23.18	First60=22.74	PredHel=1	Topology=i13-35o
Rv3499c	MCE-FAMILY PROTEIN MCE4A	0.983	0.442	38-39	Not cytoplasm	Not extracellular	plasma membrane	Cytoplasm	Unknown	Rv3499c 1 0 i12-33o	ExpAA=22.17	First60=22.15	PredHel=1	Topology=i13-35o	x		x
Rv3508	PE-PGRS FAMILY PROTEIN	0.917	0.804	32-33	Not cytoplasm	Not extracellular	Not plasma membrane	Extracell	Extracellular	Rv3508 0 Y n3-14c32/33o	ExpAA=1.22	First60=0.02	PredHel=0	Topology=o			x
Rv3511	PE-PGRS FAMILY PROTEIN	0.963	0.91	33-34	Not cytoplasm	Not extracellular	Not plasma membrane	Extracell	Extracellular	Rv3511 0 0 i	ExpAA=0.45	First60=0.02	PredHel=0	Topology=o			x
Rv3514	PE-PGRS FAMILY PROTEIN	0.917	0.804	32-33	Not cytoplasm	Not extracellular	Not plasma membrane	Extracell	Extracellular	Rv3514 0 Y n3-14c32/33o	ExpAA=1.12	First60=0.02	PredHel=0	Topology=o			x
Rv3533c	PPE FAMILY PROTEIN	0.628	0.429	41-42	Not cytoplasm	Not extracellular	plasma membrane	Extracell	Extracellular	Rv3533c 0 0 i	ExpAA=3.03	First60=1.94	PredHel=0	Topology=o			x
Rv3572	HYPOTHETICAL PROTEIN	1	0.41	24-25	No Prediction	No Prediction	No Prediction	Extracell	Unknown	Rv3572 0 Y n7-18c24/25o	ExpAA=2.00	First60=1.99	PredHel=0	Topology=o			x
Rv3576	POSSIBLE CONSERVED LIPOPROTEIN LPPH	1	0.925	31-32	cytoplasm	Not extracellular	Not plasma membrane	Cytoplasm	Unknown	Rv3576 0 Y n5-19c31/32o	ExpAA=11.70	First60=11.41	PredHel=0	Topology=o		x
Rv3578	POSSIBLE ARSENICAL PUMP INTEGRAL MEMBRANE PROTEIN ARSB2	0.996	0.434	50-51	Not cytoplasm	Not extracellular	plasma membrane	Plasma membrane	CytoplasmicMembrane	Rv3578 12 Y n3-14c19/20o29-45i52-69o99-125i137-155o175-195i215-233o239-257i269-294o306-324i331-352o358-373i385	ExpAA=249.71	First60=46.48	PredHel=12	Topology=i2-19o23-45i52-69o102-124i136-158o173-195i215-232o236-253i266-288o303-325i332-354o385-407i			x
Rv3584	POSSIBLE CONSERVED LIPOPROTEIN LPQE	1	0.393	26-27	Not cytoplasm	Not extracellular	plasma membrane	Extracell	Unknown	Rv3584 0 Y n16-27c32/33o	ExpAA=18.55	First60=18.53	PredHel=1	Topology=i13-35o		x	x
Rv3587c	PROBABLE CONSERVED MEMBRANE PROTEIN	0.979	0.651	47-48	cytoplasm	extracellular	Not plasma membrane	Extracell	Unknown	Rv3587c 1 0 i21-41o	ExpAA=21.83	First60=21.64	PredHel=1	Topology=i20-42o			x
Rv3590c	PE-PGRS FAMILY PROTEIN	0.945	0.543	33-34	Not cytoplasm	Not extracellular	plasma membrane	Extracell	Extracellular	Rv3590c 0 0 i	ExpAA=0.69	First60=0.26	PredHel=0	Topology=o			x
Rv3593	PROBABLE CONSERVED LIPOPROTEIN LPQF	1	0.833	42-43	Not cytoplasm	Not extracellular	plasma membrane	Extracell	Unknown	Rv3593 0 Y n16-29c34/35o	ExpAA=12.17	First60=10.49	PredHel=0	Topology=o	x
Rv3595c	PE-PGRS FAMILY PROTEIN	0.793	0.384	30-31	Not cytoplasm	Not extracellular	plasma membrane	Extracell	Unknown	Rv3595c 0 0 i	ExpAA=0.13	First60=0.05	PredHel=0	Topology=o			x
Rv3610c	MEMBRANE-BOUND PROTEASE FTSH (CELL DIVISION PROTEIN)	0.654	0.573	32-33	Not cytoplasm	Not extracellular	plasma membrane	Cytoplasm	CytoplasmicMembrane	Rv3610c 2 0 i7-26o115-132i	ExpAA=42.33	First60=18.94	PredHel=2	Topology=o10-27i111-133o
Rv3623	PROBABLE CONSERVED LIPOPROTEIN LPQG	0.996	0.358	33-34	Not cytoplasm	Not extracellular	Not plasma membrane	Plasma membrane	Unknown	Rv3623 0 Y n9-20c25/26o	ExpAA=0.24	First60=0.24	PredHel=0	Topology=o		x
Rv3627c	CONSERVED HYPOTHETICAL PROTEIN	1	0.538	55-56	Not cytoplasm	extracellular	Not plasma membrane	Plasma membrane	Unknown	Rv3627c 0 Y n12-23c28/29o	ExpAA=22.66	First60=22.56	PredHel=1	Topology=i12-34o
Rv3629c	PROBABLE CONSERVED INTEGRAL MEMBRANE PROTEIN	0.793	0.648	25-26	Not cytoplasm	Not extracellular	plasma membrane	Plasma membrane	CytoplasmicMembrane	Rv3629c 10 0 i7-24o30-54i66-91o127-148i169-188o194-212i244-265o271-293i302-323o329-346i	ExpAA=212.00	First60=40.83	PredHel=10	Topology=i7-26o31-53i66-88o126-148i169-188o198-215i244-266o271-293i306-323o328-350i			x
Rv3635	PROBABLE CONSERVED TRANSMEMBRANE PROTEIN	0.938	0.935	28-29	Not cytoplasm	Not extracellular	plasma membrane	Plasma membrane	CytoplasmicMembrane	Rv3635 12 Y n9-19c28/29o38-56i63-81o87-107i114-135o141-158i170-197o217-235i247-265o285-304i311-330o350-368i380	ExpAA=224.17	First60=24.11	PredHel=9	Topology=i13-35o70-92i113-135o171-193i214-236o280-302i309-328o343-362i383-405o			x
Rv3650	PE FAMILY PROTEIN	0.888	0.567	33-34	Not cytoplasm	Not extracellular	Not plasma membrane	Extracell	Unknown	Rv3650 0 0 i	ExpAA=5.28	First60=5.02	PredHel=0	Topology=o
Rv3652	PE-PGRS FAMILY-RELATED PROTEIN	0.986	0.716	32-33	Not cytoplasm	Not extracellular	Not plasma membrane	Extracell	Extracellular	Rv3652 0 0 i	ExpAA=6.73	First60=6.73	PredHel=0	Topology=o
Rv3654c	CONSERVED HYPOTHETICAL PROTEIN	0.865	0.535	29-30	cytoplasm	Not extracellular	Not plasma membrane	Extracell	Unknown	Rv3654c 0 Y n9-20c28/29o	ExpAA=10.18	First60=4.84	PredHel=0	Topology=i	x
Rv3655c	CONSERVED HYPOTHETICAL PROTEIN	0.958	0.68	25-26	Not cytoplasm	Not extracellular	plasma membrane	Plasma membrane	Cytoplasmic	Rv3655c 0 Y n3-18c23/24o	ExpAA=21.96	First60=21.94	PredHel=1	Topology=o4-26i		x	x
Rv3664c	PROBABLE DIPEPTIDE-TRANSPORT INTEGRAL MEMBRANE PROTEIN ABC TRANSPORTER DPPC	1	0.99	28-29	Not cytoplasm	Not extracellular	plasma membrane	Plasma membrane	CytoplasmicMembrane	Rv3664c 6 Y n3-14c22/23o64-87i99-118o124-143i174-194o200-220i232-249o	ExpAA=136.14	First60=21.09	PredHel=6	Topology=i5-27o67-89i102-119o124-143i174-196o231-253i			x
Rv3665c	PROBABLE DIPEPTIDE-TRANSPORT INTEGRAL MEMBRANE PROTEIN ABC TRANSPORTER DPPB	0.976	0.567	39-40	Not cytoplasm	Not extracellular	plasma membrane	Plasma membrane	CytoplasmicMembrane	Rv3665c 6 0 i9-30o97-119i131-155o175-191i233-255o275-301i	ExpAA=136.85	First60=21.77	PredHel=6	Topology=i9-31o98-120i133-155o170-192i229-251o279-301i			x
Rv3666c	PROBABLE PERIPLASMIC DIPEPTIDE-BINDING LIPOPROTEIN DPPA	1	0.419	24-25	Not cytoplasm	Not extracellular	plasma membrane	Cytoplasm	Cellwall	Rv3666c 0 Y n8-19c24/25o	ExpAA=21.18	First60=21.16	PredHel=1	Topology=i7-29o		x
Rv3668c	POSSIBLE PROTEASE	1	0.951	29-30	Not cytoplasm	extracellular	Not plasma membrane	Extracell	Unknown	Rv3668c 0 Y n8-21c29/30o	ExpAA=21.90	First60=21.79	PredHel=1	Topology=i7-29o
Rv3682	PROBABLE BIFUNCTIONAL MEMBRANE-ASSOCIATED PENICILLIN-BINDING PROTEIN 1A/1B PONA2 (MUREIN POLYMERASE) [INCLUDES: PENICILLIN-INSENSITIVE TRANSGLYCOSYLASE	0.986	0.571	48-49	Not cytoplasm	Not extracellular	plasma membrane	Extracell	Extracellular	Rv3682 0 Y n7-20c27/28o	ExpAA=22.23	First60=22.23	PredHel=1	Topology=i7-29o			x
Rv3693	POSSIBLE CONSERVED MEMBRANE PROTEIN	0.994	0.517	27-28	Not cytoplasm	Not extracellular	Not plasma membrane	Cytoplasm	Cytoplasmic	Rv3693 0 Y n9-20c38/39o	ExpAA=33.99	First60=33.64	PredHel=1	Topology=i7-29o
Rv3705c	CONSERVED HYPOTHETICAL PROTEIN	0.984	0.799	25-26	Not cytoplasm	extracellular	Not plasma membrane	Plasma membrane	Unknown	Rv3705c 0 Y n4-15c19/20o	ExpAA=22.75	First60=22.73	PredHel=0	Topology=o
Rv3717	CONSERVED HYPOTHETICAL PROTEIN	826	0.397	26-27	Not cytoplasm	Not extracellular	plasma membrane	Extracell	Unknown	Rv3717 0 Y n3-14c19/20o	ExpAA=5.14	First60=5.14	PredHel=0	Topology=o
Rv3725	POSSIBLE OXIDOREDUCTASE	0.91	0.569	26-27	cytoplasm	Not extracellular	Not plasma membrane	Cytoplasm	Unknown	Rv3725 0 Y n8-19c24/25o	ExpAA=1.41	First60=1.39	PredHel=0	Topology=o
Rv3727	POSSIBLE OXIDOREDUCTASE	0.928	0.556	29-30	Not cytoplasm	extracellular	Not plasma membrane	Cytoplasm	Cytoplasmic	Rv3727 0 Y n10-20c38/39o	ExpAA=24.65	First60=18.39	PredHel=1	Topology=i9-31o
Rv3732	CONSERVED HYPOTHETICAL PROTEIN	1	0.641	32-33	cytoplasm	Not extracellular	Not plasma membrane	Plasma membrane	Unknown	Rv3732 1 Y n9-20c27/28o322-343i	ExpAA=42.62	First60=20.12	PredHel=2	Topology=i9-31o321-343i
Rv3759c	POSSIBLE OSMOPROTECTANT (GLYCINE BETAINE/CARNITINE/CHOLINE/L-PROLINE) BINDING LIPOPROTEIN PROX	1	0.92	30-31	Not cytoplasm	Not extracellular	plasma membrane	Cytoplasm	Unknown	Rv3759c 0 Y n10-25c30/31o	ExpAA=10.30	First60=10.29	PredHel=0	Topology=o
Rv3760	POSSIBLE CONSERVED MEMBRANE PROTEIN	0.962	0.961	48-49	No Prediction	No Prediction	No Prediction	Plasma membrane	Unknown	Rv3760 2 0 i21-41o61-85i	ExpAA=45.81	First60=25.03	PredHel=2	Topology=i20-42o57-79i			x
Rv3763	19 KDA LIPOPROTEIN ANTIGEN PRECURSOR LPQH	1	0.441	32-33	Not cytoplasm	Not extracellular	plasma membrane	Extracell	Unknown	Rv3763 0 Y n5-16c21/22o	ExpAA=11.67	First60=7.64	PredHel=0	Topology=o		x	x
Rv3794	INTEGRAL MEMBRANE INDOLYLACETYLINOSITOL ARABINOSYLTRANSFERASE EMBA (ARABINOSYLINDOLYLACETYLINOSITOL SYNTHASE)	0.885	0.583	51-52	Not cytoplasm	Not extracellular	plasma membrane	Plasma membrane	CytoplasmicMembrane	Rv3794 13 0 i12-34o205-227i248-267o322-344i356-375o405-430i451-471o519-536i548-565o571-593i605-626o646-664i684	ExpAA=293.68	First60=22.71	PredHel=13	Topology=i12-34o205-224i247-269o322-344i356-375o408-430i451-470o519-536i543-565o575-597i604-626o641-663i684-706o			x
Rv3796	CONSERVED HYPOTHETICAL PROTEIN	0.931	0.749	43-44	cytoplasm	Not extracellular	Not plasma membrane	Extracell	Unknown	Rv3796 0 Y n24-35c40/41o	ExpAA=3.78	First60=3.69	PredHel=0	Topology=o	x		x
Rv3802c	PROBABLE CONSERVED MEMBRANE PROTEIN	1	0.584	38-39	Not cytoplasm	extracellular	Not plasma membrane	Extracell	Cytoplasmic	Rv3802c 1 0 i12-36o	ExpAA=22.97	First60=22.95	PredHel=1	Topology=i12-34o	x		x
Rv3803c	SECRETED MPT51/MPB51 ANTIGEN PROTEIN FBPD (MPT51/MPB51 ANTIGEN 85 COMPLEX C) (AG58C) (MYCOLYL TRANSFERASE 85C) (FIBRONECTIN-BINDING PROTEIN C) (85C)	1	0.968	33-34	Not cytoplasm	extracellular	Not plasma membrane	Extracell	Extracellular	Rv3803c 0 Y n10-21c26/27o	ExpAA=22.78	First60=20.55	PredHel=1	Topology=i5-27o	x		x
Rv3804c	SECRETED ANTIGEN 85-A FBPA (MYCOLYL TRANSFERASE 85A) (FIBRONECTIN-BINDING PROTEIN A) (ANTIGEN 85 COMPLEX A)	0.999	0.937	43-44	Not cytoplasm	extracellular	Not plasma membrane	Extracell	Extracellular	Rv3804c 0 Y n18-29c34/35o	ExpAA=23.33	First60=22.55	PredHel=1	Topology=i19-41o	x		x
Rv3810	EXPORTED REPETITIVE PROTEIN PRECURSOR PIRG (CELL SURFACE PROTEIN) (EXP53)	1	0.74	22-23	Not cytoplasm	Not extracellular	plasma membrane	Extracell	Unknown	Rv3810 0 Y n9-17c22/23o	ExpAA=18.09	First60=18.08	PredHel=1	Topology=i9-31o	x		x
Rv3812	PE-PGRS FAMILY PROTEIN	0.909	0.762	32-33	Not cytoplasm	Not extracellular	plasma membrane	Extracell	CytoplasmicMembrane	Rv3812 0 0 i	ExpAA=36.70	First60=0.07	PredHel=0	Topology=o
Rv3831	HYPOTHETICAL PROTEIN	0.611	0.572	27-28	No Prediction	No Prediction	No Prediction	Plasma membrane	CytoplasmicMembrane	Rv3831 2 Y n2-12c16/17o40-58i123-143o	ExpAA=64.48	First60=40.52	PredHel=3	Topology=i2-19o34-56i123-145o			x
Rv3851	POSSIBLE MEMBRANE PROTEIN	1	0.564	47-48	No Prediction	No Prediction	No Prediction	Extracell	Unknown	Rv3851 1 Y n21-39c47/48o71-90i	ExpAA=41.70	First60=20.81	PredHel=2	Topology=i21-40o71-90i	x		x
Rv3873	PPE FAMILY PROTEIN	0.621	0.521	42-43	Not cytoplasm	Not extracellular	plasma membrane	Extracell	Unknown	Rv3873 0 0 i	ExpAA=0.62	First60=0.35	PredHel=0	Topology=o
Rv3883c	MEMBRANE-ANCHORED MYCOSIN MYCP1 (SERINE PROTEASE) (SUBTILISIN-LIKE PROTEASE) (SUBTILASE-LIKE) (MYCOSIN-1)	1	0.863	21-22	Not cytoplasm	extracellular	Not plasma membrane	Extracell	Extracellular	Rv3883c 1 Y n4-15c21/22o419-439i	ExpAA=27.93	First60=6.06	PredHel=1	Topology=o419-438i
Rv3885c	POSSIBLE CONSERVED MEMBRANE PROTEIN	0.993	0.95	41-42	Not cytoplasm	Not extracellular	Not plasma membrane	Plasma membrane	Unknown	Rv3885c 2 0 i12-32o38-64i	ExpAA=32.81	First60=32.26	PredHel=1	Topology=i20-54o
Rv3886c	PROBABLE ALANINE AND PROLINE RICH MEMBRANE-ANCHORED MYCOSIN MYCP2 (SERINE PROTEASE) (SUBTILISIN-LIKE PROTEASE) (SUBTILASE-LIKE) (MYCOSIN-2)	1	0.588	33-34	Not cytoplasm	extracellular	Not plasma membrane	Extracell	Extracellular	Rv3886c 1 Y n12-24c33/34o525-544i	ExpAA=25.06	First60=3.13	PredHel=1	Topology=o524-546i	x		x
Rv3897c	CONSERVED HYPOTHETICAL PROTEIN	0.729	0.503	37-38	Not cytoplasm	Not extracellular	plasma membrane	Cytoplasm	Unknown	Rv3897c 0 Y n5-13c18/19o	ExpAA=13.05	First60=13.03	PredHel=0	Topology=o	x		x
Rv3901c	POSSIBLE MEMBRANE PROTEIN	0.805	0.534	56-57	Not cytoplasm	extracellular	plasma membrane	Extracell	Unknown	Rv3901c 1 0 o29-50i	ExpAA=22.26	First60=22.20	PredHel=1	Topology=i29-51o			x
Rv3909	CONSERVED HYPOTHETICAL PROTEIN	0.982	0.604	39-40	Not cytoplasm	Not extracellular	plasma membrane	Cytoplasm	Unknown	Rv3909 1 Y n2-12c17/18o738-759i	ExpAA=32.32	First60=15.62	PredHel=0	Topology=o	x
Rv3917c	PROBABLE CHROMOSOME PARTITIONING PROTEIN PARB	0.972	0.876	26-27	cytoplasm	Not extracellular	Not plasma membrane	Cytoplasm	Cytoplasmic	Rv3917c 0 0 i	ExpAA=0.00	First60=0.00	PredHel=0	Topology=o	x
	Protein having signal sequences that were mistaken with transmembrane helices.
