# Supplementary material for: Computational Prediction and Experimental Assessment of Secreted/Surface Proteins from Mycobacterium tuberculosis H37Rv
Source: PLoS Comput Biol. 2010 Jun 24;6(6):e1000824. doi: 10.1371/journal.pcbi.1000824 (PMC2891697; doi:10.1371/journal.pcbi.1000824)
Supplement: Table S4 — Proteins predicted by SecretomeP 2.0. This file contains the predictions yielded by SecretomeP 2.0 on the complete genome of M. tuberculosis H37Rv with their corresponding transmembrane topology and general localization predictions. In the last table column entitled “shared”, proteins that were also positively predicted by any of the other feature-based tools are labeled with an “x” (File format: .xls). (0.45 MB XLS) [file pcbi.1000824.s004.xls]

## Sheet: SecretomeP 2.0
Protein	Descripción Tuberculist	Subcellular localization					SecretomeP 2.0	Phobius	TMHMM 2.0				Shared
		PA-SUB v.2.5			Gpos-PLoc	PSORTb v.2.0.4		ID/helices/signal sequence/PREDICTION	ExpAA	First60	Number of helices	Topology	SignalP 3.0	TatP 1.0	LipoP 1.0
Rv0007	POSSIBLE CONSERVED MEMBRANE PROTEIN	cytoplasm	Not extracellular	plasma membrane	Extracell	Unknown	0.90197	Rv0007 2 0 i204-227o260-286i	ExpAA=49.96	First60=0.00	PredHel=2	Topology=i204-226o264-286i
Rv0008c	POSSIBLE CONSERVED MEMBRANE PROTEIN	Not cytoplasm	Not extracellular	plasma membrane	Plasma membrane	Cytoplasmic	0.600063	Rv0008c 1 0 i103-124o	ExpAA=22.58	First60=0.09	PredHel=1	Topology=i102-124o
Rv0009	PROBABLE IRON-REGULATED PEPTIDYL-PROLYL CIS-TRANS ISOMERASE A PPIA (PPIase A) (ROTAMASE A)	cytoplasm	Not extracellular	Not plasma membrane	Cytoplasm	Cytoplasmic	0.796613	Rv0009 0 0 i	ExpAA=0.09	First60=0.01	PredHel=0	Topology=o
Rv0010c	PROBABLE CONSERVED MEMBRANE PROTEIN	Not cytoplasm	Not extracellular	plasma membrane	Cytoplasm	Cytoplasmic	0.877775	Rv0010c 2 0 i12-32o38-55i	ExpAA=40.15	First60=39.29	PredHel=2	Topology=i12-31o36-55i
Rv0011c	PROBABLE CONSERVED TRANSMEMBRANE PROTEIN	Not cytoplasm	Not extracellular	plasma membrane	Plasma membrane	CytoplasmicMembrane	0.95711	Rv0011c 2 0 i31-53o73-90i	ExpAA=44.90	First60=22.79	PredHel=2	Topology=i29-51o66-88i	*
Rv0014c	TRANSMEMBRANE SERINE/THREONINE-PROTEIN KINASE B PKNB (PROTEIN KINASE B) (STPK B)	Not cytoplasm	Not extracellular	Not plasma membrane	Cytoplasm	CytoplasmicMembrane	0.683724	Rv0014c 1 0 i332-353o	ExpAA=21.53	First60=0.02	PredHel=1	Topology=i332-354o
Rv0017c	PROBABLE CELL DIVISION PROTEIN RODA	Not cytoplasm	Not extracellular	plasma membrane	Plasma membrane	CytoplasmicMembrane	0.971827	Rv0017c 12 0 i21-40o52-70i79-97o117-135i144-166o186-204i225-242o248-264i269-288o353-374i386-407o419-440i	ExpAA=253.58	First60=31.63	PredHel=12	Topology=i20-42o52-74i79-101o116-135i144-166o181-203i246-263o267-289i310-332o347-369i382-404o419-441i
Rv0018c	PHOSPHOSERINE/THREONINE PHOSPHATASE PSTP	Not cytoplasm	Not extracellular	Not plasma membrane	Cytoplasm	Cytoplasmic	0.55122	Rv0018c 1 0 i301-323o	ExpAA=23.73	First60=0.02	PredHel=1	Topology=o301-323i
Rv0019c	CONSERVED PROTEIN WITH FHA DOMAIN	cytoplasm	Not extracellular	Not plasma membrane	Cytoplasm	Unknown	0.675922	Rv0019c 1 0 o6-25i	ExpAA=20.05	First60=19.87	PredHel=1	Topology=o6-28i
Rv0020c	CONSERVED HYPOTHETICAL PROTEIN WITH FHA DOMAIN, TB39.8	Not cytoplasm	Not extracellular	Not plasma membrane	Cytoplasm	Cytoplasmic	0.952608	Rv0020c 0 0 i	ExpAA=0.00	First60=0.00	PredHel=0	Topology=o
Rv0037c	CONSERVED INTEGRAL MEMBRANE PROTEIN	Not cytoplasm	Not extracellular	plasma membrane	Plasma membrane	CytoplasmicMembrane	0.959817	Rv0037c 11 0 o68-92i99-122o128-150i162-183o195-217i229-250o262-280i287-308o328-361i382-404o410-431i	ExpAA=233.46	First60=1.26	PredHel=11	Topology=o67-89i101-123o128-150i162-184o194-216i229-246o261-283i290-312o332-354i388-405o410-432i
Rv0039c	POSSIBLE CONSERVED TRANSMEMBRANE PROTEIN	Not cytoplasm	Not extracellular	plasma membrane	Extracell	CytoplasmicMembrane	0.969886	Rv0039c 2 Y n3-18c22/23o38-58i65-85o	ExpAA=63.15	First60=41.57	PredHel=3	Topology=i2-24o39-61i66-88o	*
Rv0040c	SECRETED PROLINE RICH PROTEIN MTC28 (PROLINE RICH 28 KDA ANTIGEN)	Not cytoplasm	Not extracellular	Not plasma membrane	Extracell	Unknown	0.746844	Rv0040c 0 Y n16-27c32/33o	ExpAA=20.23	First60=20.22	PredHel=1	Topology=i7-26o	*	*
Rv0048c	POSSIBLE MEMBRANE PROTEIN	Not cytoplasm	Not extracellular	plasma membrane	Cytoplasm	Unknown	0.673262	Rv0048c 1 0 i89-111o	ExpAA=23.15	First60=0.00	PredHel=1	Topology=i89-111o
Rv0050	PROBABLE BIFUNCTIONAL PENICILLIN-BINDING PROTEIN 1A/1B PONA1 (MUREIN POLYMERASE) (PBP1): PENICILLIN-INSENSITIVE TRANSGLYCOSYLASE (PEPTIDOGLYCAN TGASE) + PENICILLIN-SENSITIVE TRANSPEPTIDASE (DD-TRANSPEPTIDASE)	Not cytoplasm	Not extracellular	plasma membrane	Extracell	Extracellular	0.569366	Rv0050 0 Y n2-10c15/16o	ExpAA=0.14	First60=0.14	PredHel=0	Topology=o
Rv0051	PROBABLE CONSERVED TRANSMEMBRANE PROTEIN	Not cytoplasm	Not extracellular	plasma membrane	Plasma membrane	CytoplasmicMembrane	0.919461	Rv0051 9 0 i58-77o190-211i223-240o260-285i297-319o364-386i393-413o433-453i465-488o	ExpAA=201.44	First60=3.88	PredHel=8	Topology=i62-79o190-212i225-247o267-289i296-318o364-386i433-450o465-487i
Rv0054	PROBABLE SINGLE-STRAND BINDING PROTEIN SSB (HELIX-DESTABILIZING PROTEIN)	cytoplasm	Not extracellular	Not plasma membrane	Cytoplasm	Cytoplasmic	0.585832	Rv0054 0 0 i	ExpAA=0.01	First60=0.01	PredHel=0	Topology=o
Rv0064	CONSERVED HYPOTHETICAL PROTEIN, ANTITOXIN	Not cytoplasm	Not extracellular	plasma membrane	Cytoplasm	CytoplasmicMembrane	0.698285	Rv0064 7 0 i16-34o54-83i114-133o171-193i213-230o261-280i287-307o	ExpAA=153.32	First60=23.19	PredHel=7	Topology=i19-41o63-85i114-136o174-196i208-230o261-280i285-307o
Rv0072	PROBABLE GLUTAMINE-TRANSPORT TRANSMEMBRANE PROTEIN ABC TRANSPORTER	Not cytoplasm	Not extracellular	plasma membrane	Plasma membrane	CytoplasmicMembrane	0.67037	Rv0072 3 Y n16-27c39/40o231-254i274-297o303-329i	ExpAA=92.58	First60=22.13	PredHel=4	Topology=i16-38o231-253i274-296o306-328i	*
Rv0076c	PROBABLE MEMBRANE PROTEIN	Not cytoplasm	Not extracellular	plasma membrane	Cytoplasm	Unknown	0.800492	Rv0076c 1 0 i99-120o	ExpAA=22.92	First60=0.00	PredHel=1	Topology=i98-120o
Rv0083	PROBABLE OXIDOREDUC	Not cytoplasm	Not extracellular	plasma membrane	Plasma membrane	CytoplasmicMembrane	0.95769	Rv0083 15 0 i7-31o51-71i83-101o107-124i136-159o179-199i211-228o240-259i271-292o312-332i353-378o398-424i445-	ExpAA=325.82	First60=31.27	PredHel=15	Topology=i7-29o53-75i80-102o107-124i136-158o178-200i207-226o241-263i270-292o312-334i354-376o391-413i444-466o497-519i620-639o
Rv0084	POSSIBLE FORMATE HYDROGENLYASE HYCD (FHL)	Not cytoplasm	Not extracellular	plasma membrane	Plasma membrane	CytoplasmicMembrane	0.962207	Rv0084 8 0 o6-24i62-85o97-119i131-150o170-189i232-252o258-282i294-314o	ExpAA=172.51	First60=19.24	PredHel=8	Topology=o5-24i62-84o94-116i133-155o170-189i234-256o261-283i295-314o
Rv0085	POSSIBLE HYDROGENASE HYCP	Not cytoplasm	Not extracellular	plasma membrane	Plasma membrane	CytoplasmicMembrane	0.973408	Rv0085 7 0 o6-26i33-53o59-79i100-121o127-145i157-177o183-201i	ExpAA=147.36	First60=42.34	PredHel=7	Topology=o4-26i33-50o60-82i95-117o127-146i153-175o179-201i
Rv0086	POSSIBLE HYDROGENASE HYCQ	Not cytoplasm	Not extracellular	plasma membrane	Plasma membrane	CytoplasmicMembrane	0.95098	Rv0086 12 0 o6-24i31-49o69-92i104-122o128-146i158-182o243-264i276-296o316-338i374-397o409-429i441-469o	ExpAA=272.44	First60=42.82	PredHel=12	Topology=o5-24i31-53o68-90i103-122o127-147i160-182o242-264i277-299o314-336i374-396o411-433i453-475o	*
Rv0090	POSSIBLE MEMBRANE PROTEIN	Not cytoplasm	Not extracellular	plasma membrane	Cytoplasm	CytoplasmicMembrane	0.672004	Rv0090 4 0 i81-105o152-175i182-200o206-223i	ExpAA=60.59	First60=0.00	PredHel=2	Topology=i152-174o202-224i
Rv0092	PROBABLE CATION TRANSPORTER P-TYPE ATPASE A CTPA	Not cytoplasm	Not extracellular	plasma membrane	Plasma membrane	CytoplasmicMembrane	0.8014	Rv0092 8 0 i98-124o130-149i161-184o204-223i361-380o386-407i693-711o717-735i	ExpAA=164.28	First60=0.00	PredHel=8	Topology=i98-120o130-149i162-184o204-223i358-380o390-407i695-714o718-735i
Rv0093c	PROBABLE CONSERVED MEMBRANE PROTEIN	Not cytoplasm	Not extracellular	plasma membrane	Plasma membrane	CytoplasmicMembrane	0.838446	Rv0093c 4 0 i130-150o170-187i194-211o223-240i	ExpAA=73.25	First60=0.01	PredHel=3	Topology=i130-149o189-211i223-240o		*
Rv0094c	CONSERVED HYPOTHETICAL PROTEIN	Not cytoplasm	Not extracellular	Not plasma membrane	Extracell	Unknown	0.788522	Rv0094c 0 0 i	ExpAA=0.01	First60=0.00	PredHel=0	Topology=o
Rv0095c	CONSERVED HYPOTHETICAL PROTEIN	cytoplasm	Not extracellular	Not plasma membrane	Cytoplasm	Cytoplasmic	0.783612	Rv0095c 1 0 o12-30i	ExpAA=17.68	First60=17.68	PredHel=1	Topology=o10-32i
Rv0096	PPE FAMILY PROTEIN	Not cytoplasm	Not extracellular	plasma membrane	Extracell	CytoplasmicMembrane	0.628555	Rv0096 2 0 i214-232o244-268i	ExpAA=50.85	First60=0.49	PredHel=2	Topology=o214-236i243-265o
Rv0102	PROBABLE CONSERVED INTEGRAL MEMBRANE PROTEIN	Not cytoplasm	Not extracellular	plasma membrane	Plasma membrane	CytoplasmicMembrane	0.963176	Rv0102 16 0 i27-48o68-88i109-130o156-173i180-198o210-231i243-266o278-299i311-331o370-389i401-419o439-460i481	ExpAA=346.80	First60=22.01	PredHel=16	Topology=i25-47o67-89i113-135o155-173i180-199o214-236i243-265o280-299i311-333o370-389i401-423o438-460i483-505o520-539i552-574o597-619i	*
Rv0103c	PROBABLE CATION-TRANSPORTER P-TYPE ATPASE B CTPB	Not cytoplasm	Not extracellular	plasma membrane	Plasma membrane	CytoplasmicMembrane	0.699449	Rv0103c 8 0 i105-126o132-150i170-188o208-226i361-383o389-410i704-720o726-744i	ExpAA=160.04	First60=0.02	PredHel=7	Topology=i106-125o135-157i170-187o207-226i360-382o397-419i706-728o
Rv0109	PE-PGRS FAMILY PROTEIN	Not cytoplasm	Not extracellular	plasma membrane	Extracell	Extracellular	0.743975	Rv0109 0 Y n3-15c33/34o	ExpAA=1.22	First60=0.77	PredHel=0	Topology=o	*
Rv0110	PROBABLE CONSERVED INTEGRAL MEMBRANE PROTEIN	Not cytoplasm	Not extracellular	plasma membrane	Plasma membrane	CytoplasmicMembrane	0.970762	Rv0110 7 0 i38-60o80-103i115-134o140-158i165-185o191-207i214-233o	ExpAA=146.05	First60=22.06	PredHel=7	Topology=i38-60o80-102i115-134o139-158i165-187o191-207i214-236o
Rv0111	POSSIBLE TRANSMEMBRANE ACYLTRANSFERASE	Not cytoplasm	Not extracellular	plasma membrane	Cytoplasm	CytoplasmicMembrane	0.889371	Rv0111 11 0 i35-54o60-80i101-120o174-192i204-229o241-257i278-298o304-323i335-354o374-392i404-425o	ExpAA=219.18	First60=12.16	PredHel=10	Topology=o58-80i101-120o173-190i203-225o235-257i278-297o307-324i336-358o373-392i405-427o
Rv0124	PE-PGRS FAMILY PROTEIN	Not cytoplasm	Not extracellular	plasma membrane	Extracell	Extracellular	0.504389	Rv0124 0 0 i	ExpAA=1.10	First60=0.95	PredHel=0	Topology=o	*
Rv0125	PROBABLE SERINE PROTEASE PEPA (SERINE PROTEINASE) (MTB32A)	Not cytoplasm	Not extracellular	plasma membrane	Extracell	Unknown	0.566701	Rv0125 0 Y n14-25c32/33o	ExpAA=21.57	First60=21.39	PredHel=1	Topology=i13-35o	*	*
Rv0128	PROBABLE CONSERVED TRANSMEMBRANE PROTEIN	Not cytoplasm	Not extracellular	plasma membrane	Plasma membrane	CytoplasmicMembrane	0.96872	Rv0128 6 0 i12-35o55-78i90-112o118-136i171-194o200-219i	ExpAA=130.27	First60=28.32	PredHel=6	Topology=i13-35o55-77i82-104o114-136i171-193o197-219i
Rv0129c	SECRETED ANTIGEN 85-C FBPC (85C) (ANTIGEN 85 COMPLEX C) (AG58C) (MYCOLYL TRANSFERASE 85C) (FIBRONECTIN-BINDING PROTEIN C)	Not cytoplasm	extracellular	Not plasma membrane	Extracell	Extracellular	0.922928	Rv0129c 1 0 i21-40o	ExpAA=22.78	First60=22.30	PredHel=1	Topology=i21-43o	*	*
Rv0143c	PROBABLE CONSERVED TRANSMEMBRANE PROTEIN	Not cytoplasm	Not extracellular	plasma membrane	Plasma membrane	CytoplasmicMembrane	0.96056	Rv0143c 10 0 i47-69o104-122i199-221o241-264i276-296o316-340i352-374o380-399i411-437o443-461i	ExpAA=221.18	First60=13.95	PredHel=10	Topology=i47-69o100-122i199-221o241-263i275-297o317-339i351-373o377-399i412-434o444-466i
Rv0156	PROBABLE NAD(P) TRANSHYDROGENASE (SUBUNIT ALPHA) PNTAB [SECOND PART; INTEGRAL MEMBRANE PROTEIN] (PYRIDINE NUCLEOTIDE TRANSHYDROGENASE SUBUNIT ALPHA) (NICOTINAMIDE NUCLEOTIDE TRANSHYDROGENASE SUBUNIT ALPHA)	Not cytoplasm	Not extracellular	plasma membrane	Plasma membrane	CytoplasmicMembrane	0.969723	Rv0156 3 0 o6-24i36-56o62-85i	ExpAA=62.75	First60=40.07	PredHel=3	Topology=i5-24o34-56i61-83o
Rv0157	PROBABLE NAD(P) TRANSHYDROGENASE (SUBUNIT BETA) PNTB [INTEGRAL MEMBRANE PROTEIN] (PYRIDINE NUCLEOTIDE TRANSHYDROGENASE SUBUNIT BETA) (NICOTINAMIDE NUCLEOTIDE TRANSHYDROGENASE SUBUNIT BETA)	Not cytoplasm	Not extracellular	plasma membrane	Plasma membrane	CytoplasmicMembrane	0.942061	Rv0157 9 0 o6-23i35-53o59-76i88-105o125-149i170-191o197-219i226-246o252-270i	ExpAA=208.48	First60=45.66	PredHel=9	Topology=o5-27i34-53o58-77i90-112o127-149i170-192o197-219i226-245o249-268i
Rv0167	CONSERVED HYPOTHETICAL INTEGRAL MEMBRANE PROTEIN YRBE1A	Not cytoplasm	Not extracellular	plasma membrane	Plasma membrane	CytoplasmicMembrane	0.955866	Rv0167 6 0 o20-37i58-81o101-124i154-180o200-220i240-261o	ExpAA=135.10	First60=23.53	PredHel=6	Topology=o15-37i56-78o93-115i155-177o197-219i240-262o
Rv0168	CONSERVED HYPOTHETICAL INTEGRAL MEMBRANE PROTEIN YRBE1B	Not cytoplasm	Not extracellular	plasma membrane	Plasma membrane	CytoplasmicMembrane	0.916441	Rv0168 5 0 i60-86o92-116i170-190o220-241i262-281o	ExpAA=121.06	First60=1.62	PredHel=5	Topology=i61-83o93-115i170-192o220-242i262-281o
Rv0169	MCE-FAMILY PROTEIN MCE1A	Not cytoplasm	Not extracellular	Not plasma membrane	Cytoplasm	CytoplasmicMembrane	0.509801	Rv0169 1 0 o20-37i	ExpAA=34.54	First60=20.98	PredHel=1	Topology=i12-34o
Rv0171	MCE-FAMILY PROTEIN MCE1C	Not cytoplasm	Not extracellular	Not plasma membrane	Extracell	Cytoplasmic	0.745958	Rv0171 0 Y n12-23c27/28o	ExpAA=21.41	First60=21.41	PredHel=1	Topology=i12-34o	*
Rv0172	MCE-FAMILY PROTEIN MCE1D	cytoplasm	Not extracellular	Not plasma membrane	Extracell	Unknown	0.739605	Rv0172 1 0 i20-41o	ExpAA=21.69	First60=21.54	PredHel=1	Topology=i20-42o	*
Rv0174	MCE-FAMILY PROTEIN MCE1F	Not cytoplasm	extracellular	Not plasma membrane	Extracell	Unknown	0.853814	Rv0174 1 0 i12-29o	ExpAA=20.57	First60=20.56	PredHel=1	Topology=i12-29o	*
Rv0176	MCE-FAMILY PROTEIN MCE1F	Not cytoplasm	Not extracellular	plasma membrane	Plasma membrane	CytoplasmicMembrane	0.794617	Rv0176 4 0 o27-49i56-79o114-132i163-188o	ExpAA=75.26	First60=25.81	PredHel=3	Topology=i29-51o56-78i166-188o
Rv0177	PROBABLE CONSERVED MCE ASSOCIATED PROTEIN	Not cytoplasm	Not extracellular	plasma membrane	Cytoplasm	Unknown	0.780078	Rv0177 1 0 o26-48i	ExpAA=18.55	First60=18.54	PredHel=1	Topology=o26-48i
Rv0178	PROBABLE CONSERVED MCE ASSOCIATED MEMBRANE PROTEIN	Not cytoplasm	Not extracellular	plasma membrane	Extracell	Unknown	0.790159	Rv0178 1 0 i79-99o	ExpAA=24.22	First60=0.00	PredHel=1	Topology=i79-101o
Rv0180c	PROBABLE CONSERVED TRANSMEMBRANE PROTEIN	Not cytoplasm	Not extracellular	plasma membrane	Plasma membrane	CytoplasmicMembrane	0.866537	Rv0180c 7 0 o25-46i177-198o218-240i269-290o302-324i331-352o392-414i	ExpAA=147.82	First60=22.85	PredHel=6	Topology=i25-47o218-240i269-291o301-323i330-352o392-414i
Rv0188	PROBABLE CONSERVED TRANSMEMBRANE PROTEIN	Not cytoplasm	Not extracellular	plasma membrane	Plasma membrane	CytoplasmicMembrane	0.969764	Rv0188 4 0 i28-46o58-77i89-109o115-134i	ExpAA=83.01	First60=23.60	PredHel=4	Topology=i32-54o64-81i88-110o114-133i
Rv0191	PROBABLE CONSERVED INTEGRAL MEMBRANE PROTEIN	Not cytoplasm	Not extracellular	plasma membrane	Plasma membrane	CytoplasmicMembrane	0.973049	Rv0191 12 0 i23-47o53-77i89-107o113-138i150-170o176-196i221-245o257-275i287-306o312-332i353-374o380-398i	ExpAA=259.03	First60=29.41	PredHel=12	Topology=o20-42i55-77o87-106i113-135o150-172i174-196o224-246i258-275o285-307i314-336o351-373i378-400o
Rv0192	CONSERVED HYPOTHETICAL PROTEIN	Not cytoplasm	Not extracellular	plasma membrane	Extracell	Unknown	0.827708	Rv0192 0 0 i	ExpAA=0.02	First60=0.00	PredHel=0	Topology=o
Rv0199	PROBABLE CONSERVED MEMBRANE PROTEIN	cytoplasm	Not extracellular	plasma membrane	Cytoplasm	Unknown	0.804874	Rv0199 1 0 o42-64i	ExpAA=23.76	First60=18.57	PredHel=1	Topology=o42-64i
Rv0200	POSSIBLE CONSERVED TRANSMEMBRANE PROTEIN	Not cytoplasm	Not extracellular	plasma membrane	Plasma membrane	CytoplasmicMembrane	0.694429	Rv0200 3 0 i7-28o34-56i77-96o	ExpAA=70.88	First60=45.57	PredHel=3	Topology=i7-29o33-55i75-97o	*
Rv0202c	PROBABLE CONSERVED TRANSMEMBRANE TRANSPORT PROTEIN MMPL11	Not cytoplasm	Not extracellular	plasma membrane	Plasma membrane	CytoplasmicMembrane	0.867842	Rv0202c 11 Y n13-24c29/30o184-202i207-226o232-254i275-299o311-333i370-392o526-545i557-578o598-618i639-662o668-	ExpAA=259.96	First60=20.28	PredHel=12	Topology=i13-32o183-205i207-229o233-255i276-298o308-330i370-392o530-552i557-579o594-616i643-662o666-688i	*
Rv0204c	PROBABLE CONSERVED TRANSMEMBRANE PROTEIN	Not cytoplasm	Not extracellular	plasma membrane	Plasma membrane	CytoplasmicMembrane	0.958247	Rv0204c 8 0 i38-59o74-92i113-137o149-176i183-203o255-276i288-313o333-354i	ExpAA=173.24	First60=22.52	PredHel=8	Topology=i37-59o74-94i115-137o152-174i181-203o252-274i295-317o332-354i
Rv0205	PROBABLE CONSERVED TRANSMEMBRANE PROTEIN	Not cytoplasm	Not extracellular	plasma membrane	Plasma membrane	CytoplasmicMembrane	0.929962	Rv0205 8 0 i20-38o44-62i74-100o164-182i203-224o230-255i262-289o309-334i	ExpAA=177.25	First60=37.11	PredHel=8	Topology=i20-38o43-65i78-100o159-181i220-242o247-269i276-298o313-335i
Rv0206c	POSSIBLE CONSERVED TRANSMEMBRANE TRANSPORT PROTEIN MMPL3	Not cytoplasm	Not extracellular	plasma membrane	Plasma membrane	CytoplasmicMembrane	0.881854	Rv0206c 13 0 o12-34i186-204o210-228i240-260o280-302i314-336o348-368i397-419o559-582i589-607o627-650i671-690o696-	ExpAA=252.63	First60=22.23	PredHel=11	Topology=o15-34i186-208o235-257i278-300o315-337i397-419o561-583i588-610o625-647i668-690o700-719i
Rv0218	PROBABLE CONSERVED TRANSMEMBRANE PROTEIN	Not cytoplasm	Not extracellular	Not plasma membrane	Cytoplasm	CytoplasmicMembrane	0.820512	Rv0218 5 0 i46-73o109-129i150-170o176-199i249-272o	ExpAA=111.69	First60=13.60	PredHel=5	Topology=i46-68o113-135i148-170o180-199i248-270o
Rv0219	PROBABLE CONSERVED TRANSMEMBRANE PROTEIN	No Prediction	No Prediction	No Prediction	Plasma membrane	Cellwall	0.966058	Rv0219 4 0 i12-34o46-70i100-120o140-163i	ExpAA=89.85	First60=33.30	PredHel=4	Topology=i13-35o50-72i100-122o142-164i
Rv0226c	PROBABLE CONSERVED TRANSMEMBRANE PROTEIN	Not cytoplasm	Not extracellular	plasma membrane	Plasma membrane	CytoplasmicMembrane	0.918656	Rv0226c 11 Y n10-21c33/34o57-83i90-112o124-142i149-166o172-188i195-213o265-284i296-318o338-357i364-386o541-559i	ExpAA=244.54	First60=21.10	PredHel=10	Topology=i7-26o90-112i125-147o162-184i196-218o265-287i294-316o338-357i364-386o537-559i
Rv0227c	PROBABLE CONSERVED MEMBRANE PROTEIN	cytoplasm	Not extracellular	Not plasma membrane	Cytoplasm	Unknown	0.930639	Rv0227c 1 Y n4-23c29/30o319-341i	ExpAA=43.63	First60=21.73	PredHel=2	Topology=i5-27o319-341i	*
Rv0228	PROBABLE INTEGRAL MEMBRANE ACYLTRANSFERASE	Not cytoplasm	Not extracellular	plasma membrane	Plasma membrane	CytoplasmicMembrane	0.962206	Rv0228 9 0 o75-92i113-131o151-177i189-209o221-242i254-274o286-306i327-351o357-377i	ExpAA=196.55	First60=2.26	PredHel=9	Topology=o70-92i113-132o161-183i188-210o220-242i255-274o284-306i327-349o355-377i
Rv0235c	PROBABLE CONSERVED TRANSMEMBRANE PROTEIN	Not cytoplasm	Not extracellular	plasma membrane	Plasma membrane	CytoplasmicMembrane	0.925147	Rv0235c 9 0 o20-39i71-90o96-113i120-139o145-168i231-248o254-278i290-310o390-410i	ExpAA=160.68	First60=19.16	PredHel=6	Topology=i21-40o71-93i100-122o225-247i254-276o291-310i
Rv0236c	PROBABLE CONSERVED TRANSMEMBRANE PROTEIN	Not cytoplasm	Not extracellular	plasma membrane	Plasma membrane	Extracellular	0.616309	Rv0236c 13 Y n11-22c30/31o64-84i91-108o120-139i146-163o175-203i215-235o278-302i314-332o401-419i1256-1277o1297	ExpAA=272.58	First60=9.36	PredHel=9	Topology=o64-86i91-113o180-202i209-231o281-303i401-423o1302-1324i1337-1354o1369-1391i	*
Rv0246	PROBABLE CONSERVED INTEGRAL MEMBRANE PROTEIN	Not cytoplasm	Not extracellular	plasma membrane	Plasma membrane	CytoplasmicMembrane	0.971647	Rv0246 12 0 i21-47o53-74i86-108o114-139i151-173o185-203i237-257o269-287i294-317o323-351i363-385o391-409i	ExpAA=262.04	First60=30.37	PredHel=12	Topology=i21-43o53-75i87-109o113-135i151-173o183-205i237-259o269-288i295-317o322-344i364-386o391-413i
Rv0249c	PROBABLE SUCCINATE DEHYDROGENASE [MEMBRANE ANCHOR SUBUNIT] (SUCCINIC DEHYDROGENASE)	No Prediction	No Prediction	No Prediction	Plasma membrane	CytoplasmicMembrane	0.97146	Rv0249c 5 0 i30-51o96-117i157-177o183-202i243-266o	ExpAA=109.79	First60=22.22	PredHel=5	Topology=i30-52o88-110i156-178o182-204i244-266o
Rv0261c	PROBABLE INTEGRAL MEMBRANE NITRITE EXTRUSION PROTEIN NARK3 (NITRITE FACILITATOR)	Not cytoplasm	Not extracellular	plasma membrane	Plasma membrane	CytoplasmicMembrane	0.970508	Rv0261c 12 0 i30-55o67-84i96-116o122-146i158-183o189-211i232-254o274-294i306-328o340-362i393-413o425-446i	ExpAA=261.58	First60=22.56	PredHel=12	Topology=i30-52o67-84i96-115o120-142i163-185o189-211i232-254o274-293i306-325o340-362i392-414o424-446i
Rv0267	PROBABLE INTEGRAL MEMBRANE NITRITE EXTRUSION PROTEIN NARU (NITRITE FACILITATOR)	Not cytoplasm	Not extracellular	plasma membrane	Plasma membrane	CytoplasmicMembrane	0.971093	Rv0267 12 0 i47-67o87-109i121-141o147-169i181-202o214-237i258-280o292-311i323-342o348-369i400-421o433-452i	ExpAA=262.77	First60=13.61	PredHel=12	Topology=i46-68o83-105i118-140o145-167i180-202o217-239i260-282o292-311i318-340o350-369i398-420o435-452i
Rv0268c	HYPOTHETICAL PROTEIN	cytoplasm	Not extracellular	Not plasma membrane	Cytoplasm	Cytoplasmic	0.584529	Rv0268c 0 0 i	ExpAA=0.00	First60=0.00	PredHel=0	Topology=i		*
Rv0279c	PE-PGRS FAMILY PROTEIN	Not cytoplasm	Not extracellular	Not plasma membrane	Extracell	Extracellular	0.778658	Rv0279c 0 0 i	ExpAA=2.33	First60=0.13	PredHel=0	Topology=o	*
Rv0283	POSSIBLE CONSERVED MEMBRANE PROTEIN	Not cytoplasm	extracellular	Not plasma membrane	Cytoplasm	Unknown	0.560738	Rv0283 1 0 i74-95o	ExpAA=21.84	First60=0.04	PredHel=1	Topology=i72-94o
Rv0286	PPE FAMILY PROTEIN	Not cytoplasm	Not extracellular	plasma membrane	Extracell	CytoplasmicMembrane	0.706764	Rv0286 2 0 o245-265i277-302o	ExpAA=111.80	First60=0.37	PredHel=3	Topology=o242-264i277-299o309-331i
Rv0290	PROBABLE CONSERVED TRANSMEMBRANE PROTEIN	Not cytoplasm	Not extracellular	plasma membrane	Plasma membrane	CytoplasmicMembrane	0.955475	Rv0290 11 0 i129-148o154-177i184-203o209-229i236-256o262-283i328-345o351-369i381-400o406-431i443-470o	ExpAA=230.02	First60=0.00	PredHel=11	Topology=i129-151o155-177i184-202o206-228i235-254o258-280i328-347o352-374i381-400o404-426i447-469o
Rv0292	PROBABLE CONSERVED TRANSMEMBRANE PROTEIN	cytoplasm	Not extracellular	plasma membrane	Plasma membrane	Unknown	0.80262	Rv0292 1 Y n13-21c26/27o36-61i	ExpAA=42.24	First60=40.57	PredHel=2	Topology=i13-30o35-57i
Rv0297	PE-PGRS FAMILY PROTEIN	Not cytoplasm	Not extracellular	plasma membrane	Extracell	Unknown	0.813133	Rv0297 0 0 i	ExpAA=0.35	First60=0.00	PredHel=0	Topology=o
Rv0304c	PPE FAMILY PROTE	Not cytoplasm	Not extracellular	plasma membrane	Extracell	CytoplasmicMembrane	0.81295	Rv0304c 0 0 i	ExpAA=9.60	First60=3.97	PredHel=0	Topology=o
Rv0305c	PPE FAMILY PROTEIN	Not cytoplasm	Not extracellular	plasma membrane	Extracell	Extracellular	0.751373	Rv0305c 0 0 i	ExpAA=10.50	First60=4.79	PredHel=0	Topology=o
Rv0308	PROBABLE CONSERVED INTEGRAL MEMBRANE PROTEIN	Not cytoplasm	Not extracellular	plasma membrane	Plasma membrane	CytoplasmicMembrane	0.966134	Rv0308 5 Y n6-16c21/22o62-83i90-112o132-152i159-181o187-205i	ExpAA=125.05	First60=20.76	PredHel=6	Topology=i7-26o61-83i90-112o127-149i156-178o188-205i	*
Rv0309	POSSIBLE CONSERVED EXPORTED PROTEIN	cytoplasm	Not extracellular	plasma membrane	Extracell	Unknown	0.904929	Rv0309 0 Y n4-22c27/28o	ExpAA=24.31	First60=24.27	PredHel=1	Topology=i7-29o	*
Rv0312	CONSERVED HYPOTHETICAL PROLINE AND THREONINE RICH PROTEIN	Not cytoplasm	extracellular	Not plasma membrane	Extracell	Unknown	0.718408	Rv0312 1 0 o444-467i	ExpAA=40.56	First60=0.05	PredHel=2	Topology=o298-317i445-467o
Rv0314c	POSSIBLE CONSERVED MEMBRANE PROTEIN	Not cytoplasm	Not extracellular	plasma membrane	Extracell	Unknown	0.935784	Rv0314c 1 0 o74-96i	ExpAA=23.46	First60=0.00	PredHel=1	Topology=i74-96o
Rv0315	POSSIBLE BETA-1,3-GLUCANASE PRECURSOR	Not cytoplasm	extracellular	Not plasma membrane	Extracell	Unknown	0.644235	Rv0315 0 Y n15-26c31/32o	ExpAA=11.80	First60=11.79	PredHel=0	Topology=o	*	*
Rv0318c	PROBABLE CONSERVED INTEGRAL MEMBRANE PROTEIN	Not cytoplasm	Not extracellular	plasma membrane	Extracell	CytoplasmicMembrane	0.969614	Rv03183 8 0 i21-43o55-75i87-104o124-145i152-172o184-206i213-230o245-263i	ExpAA=170.00	First60=26.40	PredHel=8	Topology=i22-44o59-78i85-104o124-145i152-174o184-206i213-230o245-262i
Rv0338c	PROBABLE IRON-SULFUR-BINDING REDUCTASE	Not cytoplasm	Not extracellular	plasma membrane	Cytoplasm	CytoplasmicMembrane	0.75492	Rv0338c 6 0 o6-24i72-93o113-132i153-172o184-201i213-231o	ExpAA=122.55	First60=20.94	PredHel=6	Topology=o5-24i71-93o113-135i148-170o180-202i214-231o
Rv0340	CONSERVED HYPOTHETICAL PROTEIN	Not cytoplasm	extracellular	Not plasma membrane	Extracell	Unknown	0.633063	Rv0340 0 0 i	ExpAA=0.00	First60=0.00	PredHel=0	Topology=o
Rv0344c	PROBABLE LIPOPROTEIN LPQJ	cytoplasm	Not extracellular	Not plasma membrane	Extracell	Unknown	0.741898	Rv0344c 0 Y n11-21c29/30o	ExpAA=2.33	First60=2.20	PredHel=0	Topology=o	*	*	*
Rv0346c	POSSIBLE L-ASPARAGINE PERMEASE ANSP2 (L-ASPARAGINE TRANSPORT PROTEIN)	Not cytoplasm	Not extracellular	plasma membrane	Plasma membrane	CytoplasmicMembrane	0.971323	Rv0346c 12 0 i29-50o56-78i98-116o136-158i170-190o210-231i252-274o294-315i343-364o376-395i416-434o440-460i	ExpAA=264.56	First60=26.99	PredHel=12	Topology=i29-51o56-78i99-121o136-158i163-185o205-227i252-274o294-316i342-364o369-391i412-434o438-460i		*
Rv0351	PROBABLE GRPE PROTEIN (HSP-70 COFACTOR)	cytoplasm	Not extracellular	Not plasma membrane	Cytoplasm	Unknown	0.682069	Rv0351 0 0 i	ExpAA=0.00	First60=0.00	PredHel=0	Topology=o
Rv0354c	PPE FAMILY PROTEIN	Not cytoplasm	Not extracellular	plasma membrane	Extracell	Unknown	0.659246	Rv0354c 0 0 i	ExpAA=0.60	First60=0.11	PredHel=0	Topology=o
Rv0355c	PPE FAMILY PROTEIN	Not cytoplasm	Not extracellular	plasma membrane	Extracell	CytoplasmicMembrane	0.907699	Rv0355c 0 0 i	ExpAA=20.34	First60=4.48	PredHel=0	Topology=o
Rv0359	PROBABLE CONSERVED INTEGRAL MEMBRANE PROTEIN	Not cytoplasm	Not extracellular	plasma membrane	Plasma membrane	CytoplasmicMembrane	0.957032	Rv0359 6 0 o15-33i40-62o96-117i129-153o159-180i209-235o	ExpAA=132.72	First60=39.59	PredHel=6	Topology=o15-34i41-63o95-117i129-148o158-180i209-231o
Rv0361	PROBABLE CONSERVED MEMBRANE PROTEIN	Not cytoplasm	Not extracellular	Not plasma membrane	Cytoplasm	Unknown	0.924104	Rv0361 1 0 o132-156i	ExpAA=22.92	First60=0.00	PredHel=1	Topology=i132-154o
Rv0362	POSSIBLE Mg2+ TRANSPORT TRANSMEMBRANE PROTEIN MGTE	Not cytoplasm	Not extracellular	Not plasma membrane	Plasma membrane	CytoplasmicMembrane	0.836641	Rv0362 5 0 i292-312o318-345i366-387o393-415i427-449o	ExpAA=108.10	First60=0.00	PredHel=5	Topology=i291-313o323-345i366-388o393-415i428-450o
Rv0364	POSSIBLE CONSERVED TRANSMEMBRANE PROTEIN	Not cytoplasm	Not extracellular	plasma membrane	Plasma membrane	CytoplasmicMembrane	0.96653	Rv0364 4 0 i23-47o67-91i153-176o188-209i	ExpAA=103.35	First60=28.51	PredHel=5	Topology=o15-37i42-64o69-91i154-176o186-208i
Rv0378	CONSERVED HYPOTHETICAL GLYCINE RICH PROTEIN	Not cytoplasm	Not extracellular	Not plasma membrane	Extracell	Extracellular	0.911408	Rv0378 0 0 i	ExpAA=0.03	First60=0.03	PredHel=0	Topology=o		*
Rv0383c	POSSIBLE CONSERVED SECRETED PROTEIN	cytoplasm	Not extracellular	Not plasma membrane	Cytoplasm	Cytoplasmic	0.746038	Rv0383c 1 0 o6-24i	ExpAA=19.82	First60=19.74	PredHel=1	Topology=o5-24i
Rv0397	CONSERVED 13E12 REPEAT FAMILY PROTEIN	cytoplasm	Not extracellular	Not plasma membrane	Extracell	Unknown	0.68829	Rv0397 0 0 i	ExpAA=0.00	First60=0.00	PredHel=0	Topology=o
Rv0398c	POSSIBLE SECRETED PROTEIN	No Prediction	No Prediction	No Prediction	Extracell	Unknown	0.661034	Rv0398c 0 Y n7-20c28/29o	ExpAA=19.79	First60=19.76	PredHel=1	Topology=i7-29o	*
Rv0401	PROBABLE CONSERVED TRANSMEMBRANE PROTEIN	Not cytoplasm	Not extracellular	plasma membrane	Plasma membrane	CytoplasmicMembrane	0.975827	Rv0401 3 Y n6-17c21/22o31-55i62-82o88-109i	ExpAA=83.85	First60=41.08	PredHel=4	Topology=i7-24o34-56i63-82o87-109i	*
Rv0402c	PROBABLE CONSERVED TRANSMEMBRANE TRANSPORT PROTEIN MMPL1	Not cytoplasm	Not extracellular	plasma membrane	Cytoplasm	CytoplasmicMembrane	0.855486	Rv0402c 12 0 i20-39o193-212i219-240o252-274i286-309o329-353i374-396o761-780i787-811o823-844i865-886o898-926i	ExpAA=266.14	First60=22.06	PredHel=12	Topology=i17-39o192-211i218-240o250-272i293-315o330-352i373-395o760-782i789-811o821-843i864-886o906-927i	*	*
Rv0403c	PROBABLE CONSERVED MEMBRANE PROTEIN MMPS1	Not cytoplasm	Not extracellular	plasma membrane	Plasma membrane	CytoplasmicMembrane	0.868611	Rv0403c 0 Y n13-25c33/34o	ExpAA=41.08	First60=21.14	PredHel=2	Topology=i7-29o84-106i	*
Rv0412c	POSSIBLE CONSERVED MEMBRANE PROTEIN	No Prediction	No Prediction	No Prediction	Plasma membrane	CytoplasmicMembrane	0.639898	Rv0412c 4 0 i34-53o205-227i239-259o409-432i	ExpAA=93.27	First60=20.62	PredHel=4	Topology=i36-58o205-227i239-261o410-432i
Rv0418	PROBABLE LIPOPROTEIN AMINOPEPTIDASE LPQL	Not cytoplasm	extracellular	Not plasma membrane	Cytoplasm	Extracellular	0.54186	Rv0418 0 Y n10-21c25/26o	ExpAA=18.09	First60=17.96	PredHel=1	Topology=i7-29o	*		*
Rv0420c	POSSIBLE TRANSMEMBRANE PROTEIN	No Prediction	No Prediction	No Prediction	Cytoplasm	Unknown	0.919989	Rv0420c 2 0 i29-48o101-121i	ExpAA=44.78	First60=22.58	PredHel=2	Topology=i29-51o100-122i
Rv0426c	POSSIBLE TRANSMEMBRANE PROTEIN	Not cytoplasm	Not extracellular	plasma membrane	Extracell	Unknown	0.911294	Rv0426c 1 0 o60-90i	ExpAA=46.70	First60=23.12	PredHel=2	Topology=i21-43o63-85i	*	*
Rv0431	PUTATIVE TUBERCULIN RELATED PEPTIDE	Not cytoplasm	Not extracellular	Not plasma membrane	Extracell	Unknown	0.640584	Rv0431 1 0 o20-39i	ExpAA=21.67	First60=21.59	PredHel=1	Topology=o20-42i	*
Rv0432	PROBABLE PERIPLASMIC SUPEROXIDE DISMUTASE [CU-ZN] SODC	Not cytoplasm	Not extracellular	plasma membrane	Extracell	Unknown	0.894955	Rv0432 0 Y n11-23c32/33o	ExpAA=15.62	First60=14.76	PredHel=0	Topology=o	*	*
Rv0436c	PROBABLE CDP-DIACYLGLYCEROL--SERINE O-PHOSPHATIDYLTRANSFERASE PSSA (PS SYNTHASE) (PHOSPHATIDYLSERINE SYNTHASE)	Not cytoplasm	Not extracellular	plasma membrane	Plasma membrane	CytoplasmicMembrane	0.909231	Rv0436c 7 0 i12-36o42-64i76-95o101-119i131-155o167-187i199-230o	ExpAA=122.90	First60=23.73	PredHel=5	Topology=i13-35o99-118i131-153o163-185i205-227o	*
Rv0442c	PPE FAMILY PROTEIN	Not cytoplasm	Not extracellular	plasma membrane	Extracell	Extracellular	0.721522	Rv0442c 0 0 i	ExpAA=19.09	First60=6.77	PredHel=0	Topology=o
Rv0446c	POSSIBLE CONSERVED TRANSMEMBRANE PROTEIN	Not cytoplasm	Not extracellular	plasma membrane	Cytoplasm	CytoplasmicMembrane	0.947614	Rv0446c 5 Y n2-13c19/20o29-50i57-75o104-124i131-151o201-218i	ExpAA=102.04	First60=37.76	PredHel=5	Topology=o4-21i28-50o103-125i130-152o201-223i
Rv0450c	PROBABLE CONSERVED TRANSMEMBRANE TRANSPORT PROTEIN MMPL4	Not cytoplasm	Not extracellular	plasma membrane	Cytoplasm	CytoplasmicMembrane	0.822828	Rv0450c 11 0 o20-46i203-230o250-276i305-325o331-356i377-403o769-789i796-818o824-845i875-893o905-933i	ExpAA=257.35	First60=22.80	PredHel=11	Topology=o24-46i208-230o245-267i305-327o337-359i380-402o767-789i796-818o828-850i871-893o913-934i
Rv0455c	CONSERVED HYPOTHETICAL PROTEIN	No Prediction	No Prediction	No Prediction	Cytoplasm	Unknown	0.794941	Rv0455c 0 Y n10-21c30/31o	ExpAA=16.65	First60=16.62	PredHel=1	Topology=i7-29o	*	*
Rv0460	CONSERVED HYDROPHOBIC PROTEIN	No Prediction	No Prediction	No Prediction	Plasma membrane	CytoplasmicMembrane	0.976052	Rv0460 2 Y n6-17c21/22o31-48i55-76o	ExpAA=61.01	First60=45.72	PredHel=3	Topology=i2-21o26-48i55-77o	*
Rv0461	PROBABLE TRANSMEMBRANE PROTEIN	Not cytoplasm	Not extracellular	Not plasma membrane	Plasma membrane	CytoplasmicMembrane	0.956049	Rv0461 3 0 i76-99o105-128i135-159o	ExpAA=68.07	First60=0.01	PredHel=3	Topology=o77-99i106-128o138-160i
Rv0463	PROBABLE CONSERVED MEMBRANE PROTEIN	Not cytoplasm	Not extracellular	plasma membrane	Plasma membrane	CytoplasmicMembrane	0.970737	Rv0463 3 0 i12-31o43-63i75-96o	ExpAA=63.55	First60=37.47	PredHel=3	Topology=i12-31o46-64i71-93o
Rv0473	POSSIBLE CONSERVED TRANSMEMBRANE PROTEIN	Not cytoplasm	Not extracellular	plasma membrane	Cytoplasm	CytoplasmicMembrane	0.712894	Rv0473 3 0 i56-76o88-110i432-452o	ExpAA=63.92	First60=5.10	PredHel=3	Topology=i56-74o84-106i430-452o
Rv0476	POSSIBLE CONSERVED TRANSMEMBRANE PROTEIN	Not cytoplasm	Not extracellular	plasma membrane	Plasma membrane	CytoplasmicMembrane	0.914585	Rv0476 1 Y n2-10c15/16o39-72i	ExpAA=43.52	First60=42.73	PredHel=2	Topology=i2-21o36-58i
Rv0479c	PROBABLE CONSERVED MEMBRANE PROTEIN	Not cytoplasm	Not extracellular	plasma membrane	Extracell	Unknown	0.806626	Rv0479c 1 0 i111-135o	ExpAA=22.25	First60=0.00	PredHel=1	Topology=i113-135o
Rv0483	PROBABLE CONSERVED LIPOPROTEIN LPRQ	Not cytoplasm	Not extracellular	plasma membrane	Extracell	Unknown	0.674734	Rv0483 0 0 i	ExpAA=0.90	First60=0.89	PredHel=0	Topology=o	*
Rv0488	PROBABLE CONSERVED INTEGRAL MEMBRANE PROTEIN	Not cytoplasm	Not extracellular	plasma membrane	Plasma membrane	CytoplasmicMembrane	0.962541	Rv0488 5 0 i24-53o59-81i93-113o133-153i165-187o	ExpAA=109.35	First60=25.57	PredHel=5	Topology=o24-46i59-81o91-113i133-155o165-187i
Rv0497	PROBABLE CONSERVED TRANSMEMBRANE PROTEIN	Not cytoplasm	Not extracellular	plasma membrane	Cytoplasm	CytoplasmicMembrane	0.903988	Rv0497 3 0 i227-251o257-277i289-307o	ExpAA=64.88	First60=0.05	PredHel=3	Topology=i228-250o260-279i286-308o
Rv0507	PROBABLE CONSERVED TRANSMEMBRANE TRANSPORT PROTEIN MMPL2	Not cytoplasm	Not extracellular	plasma membrane	Plasma membrane	CytoplasmicMembrane	0.818512	Rv0507 12 0 i21-41o194-213i220-239o251-272i293-317o329-354i375-397o765-783i790-812o818-841i862-885o891-910i	ExpAA=257.33	First60=21.45	PredHel=11	Topology=o22-41i211-233o248-270i290-312o332-354i375-397o761-783i790-812o822-844i864-886o891-913i	*
Rv0513	POSSIBLE CONSERVED TRANSMEMBRANE PROTEIN	cytoplasm	Not extracellular	Not plasma membrane	Cytoplasm	Unknown	0.911443	Rv0513 2 0 o20-36i43-62o	ExpAA=40.94	First60=38.82	PredHel=2	Topology=i13-35o40-62i
Rv0514	POSSIBLE TRANSMEMBRANE PROTEIN	No Prediction	No Prediction	No Prediction	Plasma membrane	Unknown	0.954933	Rv0514 1 Y n11-22c30/31o54-73i	ExpAA=40.22	First60=28.70	PredHel=2	Topology=i7-26o48-70i	*	*
Rv0517	POSSIBLE MEMBRANE ACYLTRANSFERASE	Not cytoplasm	Not extracellular	plasma membrane	Plasma membrane	CytoplasmicMembrane	0.962305	Rv0517 10 0 i38-57o77-97i118-137o181-202i214-234o240-258i270-290o302-325i337-356o368-390i	ExpAA=209.29	First60=17.80	PredHel=10	Topology=i39-58o78-97i117-139o179-201i213-235o239-258i270-289o304-326i333-355o370-390i
Rv0522	PROBABLE GABA PERMEASE GABP (4-AMINO BUTYRATE TRANSPORT CARRIER) (GAMA-AMINOBUTYRATE PERMEASE)	Not cytoplasm	Not extracellular	plasma membrane	Extracell	Extracellular	0.969115	Rv0522 11 Y n2-13c17/18o27-45i66-85o105-127i139-157o177-198i219-240o265-290i310-330o336-355i376-394o406-426i	ExpAA=261.28	First60=39.27	PredHel=12	Topology=i2-24o28-45i66-88o103-125i132-154o169-191i219-241o261-283i309-331o335-357i370-392o407-426i
Rv0527	POSSIBLE CYTOCHROME C-TYPE BIOGENESIS PROTEIN CCDA	Not cytoplasm	Not extracellular	plasma membrane	Plasma membrane	CytoplasmicMembrane	0.959961	Rv0527 5 Y n7-25c29/30o69-92i104-126o146-170i182-207o219-240i	ExpAA=151.90	First60=36.66	PredHel=7	Topology=i7-29o33-50i71-93o108-127i147-169o184-206i219-241o	*
Rv0528	PROBABLE CONSERVED TRANSMEMBRANE PROTEIN	Not cytoplasm	Not extracellular	Not plasma membrane	Cytoplasm	CytoplasmicMembrane	0.746296	Rv0528 3 Y n10-21c29/30o64-83i158-177o444-463i	ExpAA=86.03	First60=22.15	PredHel=4	Topology=i5-27o61-83i157-179o441-463i	*
Rv0529	POSSIBLE CYTOCHROME C-TYPE BIOGENESIS PROTEIN CCSA	Not cytoplasm	Not extracellular	Not plasma membrane	Plasma membrane	CytoplasmicMembrane	0.967903	Rv0529 8 0 o16-34i80-101o113-130i137-158o170-198i228-251o263-281i293-321o	ExpAA=172.71	First60=21.37	PredHel=8	Topology=o15-34i80-102o107-129i136-158o173-195i227-249o269-286i293-315o	*
Rv0531	POSSIBLE CONSERVED MEMBRANE PROTEIN	Not cytoplasm	Not extracellular	plasma membrane	Plasma membrane	Unknown	0.932662	Rv0531 2 0 i12-34o46-67i	ExpAA=44.71	First60=36.37	PredHel=2	Topology=i21-43o48-70i
Rv0532	PE-PGRS FAMILY PROTEIN	Not cytoplasm	Not extracellular	plasma membrane	Extracell	Extracellular	0.732446	Rv0532 0 Y n4-15c33/34o	ExpAA=2.38	First60=2.14	PredHel=0	Topology=o	*
Rv0534c	1,4-DIHYDROXY-2-NAPHTHOATE OCTAPRENYLTRANSFERASE MENA (DHNA-OCTAPRENYLTRANSFERASE)	Not cytoplasm	Not extracellular	plasma membrane	Plasma membrane	CytoplasmicMembrane	0.962053	Rv0534c 6 0 o37-58i97-130o136-156i168-187o216-249i270-291o	ExpAA=149.53	First60=27.59	PredHel=7	Topology=o35-57i88-110o114-131i136-158o168-190i221-243o267-289i
Rv0537c	PROBABLE INTEGRAL MEMBRANE PROTEIN	cytoplasm	Not extracellular	Not plasma membrane	Plasma membrane	CytoplasmicMembrane	0.97156	Rv0537c 11 0 o17-34i46-66o72-90i146-165o185-205i217-237o263-279i300-328o334-352i364-389o409-431i	ExpAA=259.89	First60=38.45	PredHel=12	Topology=i13-35o45-67i74-96o101-123i146-168o188-210i217-239o262-279i299-321o331-350i363-385o409-431i
Rv0538	POSSIBLE CONSERVED MEMBRANE PROTEIN	Not cytoplasm	extracellular	Not plasma membrane	Extracell	Cellwall	0.941176	Rv0538 1 0 i279-303o	ExpAA=24.81	First60=0.00	PredHel=1	Topology=i278-300o
Rv0541c	PROBABLE CONSERVED INTEGRAL MEMBRANE PROTEIN	Not cytoplasm	Not extracellular	plasma membrane	Plasma membrane	CytoplasmicMembrane	0.948833	Rv0541c 11 0 i7-24o59-81i88-107o181-204i216-249o269-291i303-322o342-369i381-400o406-422i429-447o	ExpAA=228.26	First60=23.02	PredHel=10	Topology=i7-29o59-81i88-110o181-203i224-246o266-288i300-322o347-369i382-399o429-446i	*
Rv0544c	POSSIBLE CONSERVED TRANSMEMBRANE PROTEIN	Not cytoplasm	Not extracellular	plasma membrane	Plasma membrane	CytoplasmicMembrane	0.925059	Rv0544c 1 Y n13-24c29/30o53-74i	ExpAA=44.41	First60=31.12	PredHel=2	Topology=i13-32o52-74i	*
Rv0545c	PROBABLE LOW-AFFINITY INORGANIC PHOSPHATE TRANSPORTER INTEGRAL MEMBRANE PROTEIN PITA	Not cytoplasm	Not extracellular	plasma membrane	Plasma membrane	CytoplasmicMembrane	0.945362	Rv0545c 7 Y n3-13c17/18o41-65i77-99o105-123i135-158o219-238i308-329o335-354i	ExpAA=193.23	First60=36.50	PredHel=8	Topology=i5-24o44-66i79-101o106-128i135-157o216-238i308-327o332-354i	*
Rv0556	PROBABLE CONSERVED TRANSMEMBRANE PROTEIN	Not cytoplasm	Not extracellular	plasma membrane	Plasma membrane	CytoplasmicMembrane	0.828964	Rv0556 2 0 i33-54o128-156i	ExpAA=45.79	First60=22.46	PredHel=2	Topology=i33-55o131-153i
Rv0563	PROBABLE PROTEASE TRANSMEMBRANE PROTEIN HEAT SHOCK PROTEIN HTPX	Not cytoplasm	Not extracellular	plasma membrane	Plasma membrane	CytoplasmicMembrane	0.897034	Rv0563 4 0 i12-29o35-51i145-169o181-201i	ExpAA=80.65	First60=36.99	PredHel=4	Topology=i13-30o34-51i145-167o182-201i	*
Rv0578c	PE-PGRS FAMILY PROTEIN	Not cytoplasm	Not extracellular	Not plasma membrane	Extracell	Extracellular	0.924823	Rv0578c 0 0 i	ExpAA=0.22	First60=0.03	PredHel=0	Topology=o
Rv0583c	PROBABLE CONSERVED LIPOPROTEIN LPQN	Not cytoplasm	Not extracellular	plasma membrane	Extracell	Unknown	0.894	Rv0583c 0 Y n4-13c18/19o	ExpAA=5.86	First60=5.80	PredHel=0	Topology=o	*		*
Rv0584	POSSIBLE CONSERVED EXPORTED PROTEIN	cytoplasm	Not extracellular	Not plasma membrane	Extracell	Extracellular	0.74689	Rv0584 0 Y n10-21c26/27o	ExpAA=22.41	First60=22.15	PredHel=1	Topology=i9-31o	*
Rv0585c	PROBABLE CONSERVED INTEGRAL MEMBRANE PROTEIN	Not cytoplasm	Not extracellular	plasma membrane	Plasma membrane	CytoplasmicMembrane	0.906761	Rv0585c 14 0 i25-44o72-92i99-122o145-161i168-187o193-214i493-513o525-550i606-625o637-656i688-710o716-735i742	ExpAA=323.52	First60=21.61	PredHel=14	Topology=i28-50o70-92i99-121o168-187i192-214o496-518i525-547o562-584i605-627o637-656i688-710o714-736i741-763o767-789i
Rv0587	CONSERVED HYPOTHETICAL INTEGRAL MEMBRANE PROTEIN YRBE2A	Not cytoplasm	Not extracellular	plasma membrane	Plasma membrane	CytoplasmicMembrane	0.927539	Rv0587 5 0 i51-81o101-124i150-180o200-220i240-261o	ExpAA=116.23	First60=5.60	PredHel=5	Topology=i59-81o96-118i158-180o200-219i240-262o
Rv0588	CONSERVED HYPOTHETICAL INTEGRAL MEMBRANE PROTEIN YRBE2B	Not cytoplasm	Not extracellular	plasma membrane	Plasma membrane	CytoplasmicMembrane	0.954362	Rv0588 5 0 i66-92o98-122i176-206o226-247i268-287o	ExpAA=124.60	First60=0.14	PredHel=6	Topology=i67-89o99-121i126-148o168-190i228-250o265-287i
Rv0591	MCE-FAMILY PROTEIN MCE2C	Not cytoplasm	Not extracellular	plasma membrane	Extracell	Unknown	0.616031	Rv0591 0 Y n16-24c29/30o	ExpAA=21.53	First60=21.50	PredHel=1	Topology=i12-34o	*
Rv0592	MCE-FAMILY PROTEIN MCE2C	cytoplasm	Not extracellular	Not plasma membrane	Extracell	Unknown	0.793108	Rv0592 0 Y n19-29c34/35o	ExpAA=21.17	First60=21.08	PredHel=1	Topology=i19-41o	*
Rv0594	MCE-FAMILY PROTEIN MCE2F	Not cytoplasm	Not extracellular	plasma membrane	Extracell	Unknown	0.683656	Rv0594 1 0 i10-29o	ExpAA=20.91	First60=20.91	PredHel=1	Topology=i12-29o
Rv0601c	PROBABLE TWO COMPONENT SENSOR KINASE [FIRST PART]	Not cytoplasm	Not extracellular	plasma membrane	Plasma membrane	Unknown	0.630733	Rv0601c 1 Y n3-14c19/20o43-62i	ExpAA=22.54	First60=18.10	PredHel=1	Topology=o45-67i
Rv0603	POSSIBLE EXPORTED PROTEIN	Not cytoplasm	Not extracellular	plasma membrane	Cytoplasm	Unknown	0.723704	Rv0603 0 Y n4-16c28/29o	ExpAA=22.68	First60=22.68	PredHel=1	Topology=i7-29o	*
Rv0615	PROBABLE INTEGRAL MEMBRANE PROTEIN	Not cytoplasm	Not extracellular	plasma membrane	Plasma membrane	CytoplasmicMembrane	0.974713	Rv0615 1 Y n4-16c20/21o44-70i	ExpAA=57.84	First60=47.20	PredHel=3	Topology=o4-22i29-48o52-71i
Rv0622	POSSIBLE MEMBRANE PROTEIN	Not cytoplasm	Not extracellular	plasma membrane	Extracell	Unknown	0.615477	Rv0622 1 0 i134-158o	ExpAA=22.84	First60=0.00	PredHel=1	Topology=i134-156o
Rv0625c	PROBABLE CONSERVED TRANSMEMBRANE PROTEIN	Not cytoplasm	Not extracellular	plasma membrane	Plasma membrane	CytoplasmicMembrane	0.951693	Rv0625c 5 0 o20-44i56-77o83-107i153-176o196-216i	ExpAA=111.11	First60=28.63	PredHel=5	Topology=o15-34i54-76o86-108i152-174o194-216i	*
Rv0633c	POSSIBLE EXPORTED PROTEIN	No Prediction	No Prediction	No Prediction	Cytoplasm	Cytoplasmic	0.76473	Rv0633c 1 0 o20-41i	ExpAA=21.35	First60=21.34	PredHel=1	Topology=o20-42i
Rv0638	PROBABLE PREPROTEIN TRANSLOCASE SECE1	Not cytoplasm	Not extracellular	plasma membrane	Plasma membrane	Unknown	0.742783	Rv0638 1 0 i127-148o	ExpAA=22.07	First60=0.00	PredHel=1	Topology=i126-148o
Rv0658c	PROBABLE CONSERVED INTEGRAL MEMBRANE PROTEIN	Not cytoplasm	Not extracellular	plasma membrane	Plasma membrane	CytoplasmicMembrane	0.97028	Rv0658c 7 0 i15-38o44-67i88-112o132-154i166-183o189-206i218-237o	ExpAA=150.43	First60=36.40	PredHel=7	Topology=i16-38o48-70i90-112o132-154i166-184o189-211i218-237o
Rv0664	HYPOTHETICAL PROTEIN, ANTITOXIN	Not cytoplasm	Not extracellular	plasma membrane	Cytoplasm	Cytoplasmic	0.697382	Rv0664 0 0 i	ExpAA=0.00	First60=0.00	PredHel=0	Topology=i		*
Rv0676c	PROBABLE CONSERVED TRANSMEMBRANE TRANSPORT PROTEIN MMPL5	Not cytoplasm	Not extracellular	plasma membrane	Plasma membrane	CytoplasmicMembrane	0.812043	Rv0676c 12 0 i31-50o204-223i230-252o258-282i303-327o339-361i382-408o774-793i800-826o832-853i874-896o902-921i	ExpAA=265.92	First60=21.49	PredHel=12	Topology=i31-53o204-223i230-252o262-284i297-319o339-361i382-404o772-794i801-823o833-855i876-898o918-940i
Rv0677c	POSSIBLE CONSERVED MEMBRANE PROTEIN MMPS5	Not cytoplasm	Not extracellular	plasma membrane	Cytoplasm	Unknown	0.537293	Rv0677c 0 Y n12-23c27/28o	ExpAA=19.67	First60=19.66	PredHel=1	Topology=i7-26o	*
Rv0679c	CONSERVED HYPOTHETICAL THREONINE RICH PROTEIN	Not cytoplasm	extracellular	plasma membrane	Extracell	Extracellular	0.823923	Rv0679c 0 Y n16-28c33/34o	ExpAA=6.07	First60=6.05	PredHel=0	Topology=o	*	*	*
Rv0680c	PROBABLE CONSERVED TRANSMEMBRANE PROTEIN	Not cytoplasm	Not extracellular	plasma membrane	Cytoplasm	Unknown	0.95702	Rv0680c 0 Y n6-17c22/23o	ExpAA=33.67	First60=21.14	PredHel=2	Topology=i7-29o60-82i	*
Rv0682	PROBABLE 30S RIBOSOMAL PROTEIN S12 RPSL	cytoplasm	Not extracellular	Not plasma membrane	Cytoplasm	Unknown	0.519877	Rv0682 0 0 i	ExpAA=0.00	First60=0.00	PredHel=0	Topology=o
Rv0686	PROBABLE MEMBRANE PROTEIN	No Prediction	No Prediction	No Prediction	Plasma membrane	Unknown	0.764919	Rv0686 2 0 i12-32o38-57i	ExpAA=44.41	First60=44.09	PredHel=2	Topology=i9-31o35-57i
Rv0712	CONSERVED HYPOTHETICAL PROTEIN	Not cytoplasm	extracellular	Not plasma membrane	Cytoplasm	Unknown	0.569053	Rv0712 0 0 i	ExpAA=0.00	First60=0.00	PredHel=0	Topology=o
Rv0713	PROBABLE CONSERVED TRANSMEMBRANE PROTEIN	Not cytoplasm	Not extracellular	plasma membrane	Cytoplasm	CytoplasmicMembrane	0.88345	Rv0713 4 0 i34-55o222-247i259-277o289-309i	ExpAA=85.01	First60=21.83	PredHel=4	Topology=i33-55o222-244i257-274o289-308i
Rv0732	PROBABLE PREPROTEIN TRANSLOCASE SECY	Not cytoplasm	Not extracellular	plasma membrane	Plasma membrane	CytoplasmicMembrane	0.95602	Rv0732 9 Y n18-27c32/33o74-98i118-137o157-178i185-204o216-235i263-284o318-340i372-394o406-424i	ExpAA=211.24	First60=16.65	PredHel=9	Topology=o76-98i119-141o156-178i185-204o214-236i270-292o318-340i372-394o399-421i	*
Rv0746	PE-PGRS FAMILY PROTEIN	Not cytoplasm	Not extracellular	Not plasma membrane	Extracell	Extracellular	0.723259	Rv0746 0 Y n10-21c33/34o	ExpAA=97.90	First60=2.70	PredHel=0	Topology=o	*
Rv0747	PE-PGRS FAMILY PROTEIN	Not cytoplasm	Not extracellular	Not plasma membrane	Extracell	Extracellular	0.739518	Rv0747 0 Y n10-21c30/31o	ExpAA=14.75	First60=1.12	PredHel=0	Topology=o	*
Rv0755c	PPE FAMILY PROTEIN	Not cytoplasm	Not extracellular	plasma membrane	Extracell	Extracellular	0.898589	Rv0755c 0 0 i	ExpAA=0.04	First60=0.00	PredHel=0	Topology=o
Rv0763c	POSSIBLE FERREDOXIN	cytoplasm	Not extracellular	Not plasma membrane	Cytoplasm	Cytoplasmic	0.698152	Rv0763c 0 0 i	ExpAA=0.00	First60=0.00	PredHel=0	Topology=i
Rv0779c	POSSIBLE CONSERVED TRANSMEMBRANE PROTEIN	cytoplasm	Not extracellular	Not plasma membrane	Plasma membrane	Unknown	0.71132	Rv0779c 2 0 i20-39o108-132i	ExpAA=44.24	First60=20.92	PredHel=2	Topology=i13-35o110-132i
Rv0783c	POSSIBLE MULTIDRUG RESISTANCE INTEGRAL MEMBRANE EFFLUX PROTEIN EMRB	Not cytoplasm	Not extracellular	plasma membrane	Plasma membrane	CytoplasmicMembrane	0.967445	Rv0783c 14 0 i40-59o79-98i110-129o135-156i168-192o198-219i231-250o262-282i303-324o336-353i365-385o397-417i438	ExpAA=285.33	First60=15.98	PredHel=13	Topology=o43-65i78-100o115-137i170-192o196-218i231-253o263-282i302-324o339-356i363-385o395-417i438-455o503-525i
Rv0810c	CONSERVED HYPOTHETICAL PROTEIN	No Prediction	No Prediction	No Prediction	Cytoplasm	Unknown	0.961385	Rv0810c 0 0 i	ExpAA=0.00	First60=0.00	PredHel=0	Topology=i
Rv0815c	PROBABLE THIOSULFATE SULFURTRANSFERASE CYSA2 (RHODANESE-LIKE PROTEIN) (THIOSULFATE CYANIDE TRANSSULFURASE) (THIOSULFATE THIOTRANSFERASE)	cytoplasm	Not extracellular	Not plasma membrane	Cytoplasm	Cytoplasmic	0.699982	Rv0815c 0 0 i	ExpAA=0.32	First60=0.00	PredHel=0	Topology=o
Rv0816c	PROBABLE THIOREDOXIN THIX	cytoplasm	Not extracellular	Not plasma membrane	Cytoplasm	Cytoplasmic	0.697352	Rv0816c 0 Y n5-14c18/19o	ExpAA=15.51	First60=15.50	PredHel=1	Topology=o4-23i
Rv0822c	CONSERVED HYPOTHETICAL PROTEIN	Not cytoplasm	Not extracellular	plasma membrane	Extracell	Unknown	0.529198	Rv0822c 1 0 i176-194o	ExpAA=15.55	First60=0.01	PredHel=0	Topology=o
Rv0829	POSSIBLE TRANSPOSASE (FRAGMENT)	Not cytoplasm	Not extracellular	Not plasma membrane	Cytoplasm	Unknown	0.707886	Rv0829 0 0 i	ExpAA=0.00	First60=0.00	PredHel=0	Topology=o
Rv0833	PE-PGRS FAMILY PROTEIN	Not cytoplasm	Not extracellular	Not plasma membrane	Extracell	Extracellular	0.882447	Rv0833 0 0 i	ExpAA=90.98	First60=41.24	PredHel=2	Topology=o10-32i39-61o		*
Rv0834c	PE-PGRS FAMILY PROTEIN	Not cytoplasm	Not extracellular	Not plasma membrane	Extracell	Extracellular	0.703777	Rv0834c 0 0 i	ExpAA=205.28	First60=2.08	PredHel=0	Topology=o
Rv0842	Rv0842	Not cytoplasm	Not extracellular	plasma membrane	Plasma membrane	CytoplasmicMembrane	0.968673	Rv0842 12 0 i25-45o57-81i88-107o113-140i152-175o181-199i231-256o268-288i300-318o324-346i358-381o387-412i	ExpAA=252.63	First60=25.10	PredHel=11	Topology=i25-47o57-79i86-108o118-140i153-175o179-201i231-253o266-288i300-322o360-382i387-409o
Rv0845	POSSIBLE TWO COMPONENT SENSOR KINASE	Not cytoplasm	Not extracellular	plasma membrane	Plasma membrane	CytoplasmicMembrane	0.863574	Rv0845 6 0 i40-61o67-89i109-125o131-148i155-178o184-201i	ExpAA=119.66	First60=19.25	PredHel=6	Topology=i40-62o67-89i110-127o131-148i155-174o184-201i
Rv0847	PROBABLE LIPOPROTEIN LPQS	cytoplasm	Not extracellular	plasma membrane	Plasma membrane	Unknown	0.653236	Rv0847 0 Y n7-18c23/24o	ExpAA=22.47	First60=22.32	PredHel=1	Topology=i7-29o	*
Rv0849	PROBABLE CONSERVED INTEGRAL MEMBRANE TRANSPORT PROTEIN	Not cytoplasm	Not extracellular	plasma membrane	Plasma membrane	CytoplasmicMembrane	0.971312	Rv0849 12 0 i16-32o38-59i80-98o104-126i138-160o166-186i213-234o246-269i281-299o305-329i349-370o382-401i	ExpAA=252.10	First60=36.11	PredHel=12	Topology=i13-35o39-56i77-99o104-126i138-160o164-186i213-232o247-269i282-299o309-331i344-366o381-398i
Rv0850	PUTATIVE TRANSPOSASE (FRAGMENT)	No Prediction	No Prediction	No Prediction	Cytoplasm	Cytoplasmic	0.864682	Rv0850 0 0 i	ExpAA=0.00	First60=0.00	PredHel=0	Topology=o
Rv0854	CONSERVED HYPOTHETICAL PROTEIN	cytoplasm	Not extracellular	Not plasma membrane	Cytoplasm	Cytoplasmic	0.602054	Rv0854 0 0 i	ExpAA=0.00	First60=0.00	PredHel=0	Topology=o
Rv0863	CONSERVED HYPOTHETICAL PROTEIN	No Prediction	No Prediction	No Prediction	Cytoplasm	Unknown	0.930793	Rv0863 0 0 i	ExpAA=0.00	First60=0.00	PredHel=0	Topology=i
Rv0867c	POSSIBLE RESUSCITATION-PROMOTING FACTOR RPFA	Not cytoplasm	extracellular	Not plasma membrane	Extracell	Cellwall	0.81803	Rv0867c 0 Y n18-26c38/39o	ExpAA=19.35	First60=19.34	PredHel=1	Topology=i13-35o	*	*
Rv0870c	POSSIBLE CONSERVED INTEGRAL MEMBRANE PROTEIN	Not cytoplasm	Not extracellular	plasma membrane	Plasma membrane	CytoplasmicMembrane	0.957853	Rv0870c 4 0 i7-24o30-50i62-83o89-109i	ExpAA=81.88	First60=39.93	PredHel=3	Topology=i7-41o61-83i90-112o	*
Rv0872c	PE-PGRS FAMILY PROTEIN	Not cytoplasm	Not extracellular	plasma membrane	Extracell	Extracellular	0.865667	Rv0872c 0 0 i	ExpAA=2.14	First60=0.26	PredHel=0	Topology=o
Rv0875c	POSSIBLE CONSERVED EXPORTED PROTEIN	Not cytoplasm	Not extracellular	Not plasma membrane	Cytoplasm	Unknown	0.685424	Rv0875c 0 Y n5-16c21/22o	ExpAA=22.41	First60=22.40	PredHel=1	Topology=i5-27o	*
Rv0876c	POSSIBLE CONSERVED TRANSMEMBRANE PROTEIN	Not cytoplasm	Not extracellular	plasma membrane	Plasma membrane	CytoplasmicMembrane	0.953491	Rv0876c 10 0 i113-138o144-163i175-193o205-224i245-265o271-292i343-363o375-396i417-443o479-508i	ExpAA=226.78	First60=0.00	PredHel=10	Topology=i112-134o144-166i175-192o202-224i246-268o272-294i344-366o376-398i410-432o489-511i
Rv0878c	PPE FAMILY PROTEIN	Not cytoplasm	Not extracellular	plasma membrane	Extracell	Extracellular	0.690663	Rv0878c 0 0 i	ExpAA=8.50	First60=5.87	PredHel=0	Topology=o
Rv0879c	POSSIBLE CONSERVED TRANSMEMBRANE PROTEIN	Not cytoplasm	Not extracellular	plasma membrane	Plasma membrane	Unknown	0.958202	Rv0879c 2 0 i21-42o48-68i	ExpAA=44.25	First60=32.85	PredHel=2	Topology=i21-43o53-72i
Rv0882	PROBABLE TRANSMEMBRANE PROTEIN	Not cytoplasm	Not extracellular	plasma membrane	Plasma membrane	CytoplasmicMembrane	0.975829	Rv0882 3 0 o12-35i42-62o68-91i	ExpAA=66.50	First60=42.39	PredHel=3	Topology=i9-31o41-63i70-92o
Rv0888	PROBABLE EXPORTED PROTEIN	Not cytoplasm	Not extracellular	plasma membrane	Extracell	Unknown	0.89548	Rv0888 0 Y n10-23c31/32o	ExpAA=21.65	First60=20.86	PredHel=1	Topology=i7-29o	*
Rv0899	OUTER MEMBRANE PROTEIN A OMPA	Not cytoplasm	Not extracellular	plasma membrane	Extracell	Unknown	0.571316	Rv0899 1 0 i31-50o	ExpAA=21.52	First60=21.18	PredHel=1	Topology=i28-50o
Rv0900	POSSIBLE MEMBRANE PROTEIN	Not cytoplasm	Not extracellular	plasma membrane	Plasma membrane	Unknown	0.951087	Rv0900 0 Y n4-15c21/22o	ExpAA=22.25	First60=22.25	PredHel=1	Topology=o4-26i
Rv0901	POSSIBLE CONSERVED EXPORTED OR MEMBRANE PROTEIN	cytoplasm	Not extracellular	Not plasma membrane	Cytoplasm	Unknown	0.969595	Rv0901 1 0 o6-25i	ExpAA=21.31	First60=21.31	PredHel=1	Topology=o4-26i
Rv0907	CONSERVED HYPOTHETICAL PROTEIN	Not cytoplasm	Not extracellular	plasma membrane	Extracell	CytoplasmicMembrane	0.810169	Rv0907 0 0 i	ExpAA=0.15	First60=0.00	PredHel=0	Topology=o
Rv0908	PROBABLE METAL CATION TRANSPORTER ATPASE P-TYPE CTPE	Not cytoplasm	Not extracellular	plasma membrane	Plasma membrane	CytoplasmicMembrane	0.841178	Rv0908 9 0 o50-80i215-232o252-274i602-621o633-655i667-690o702-722i729-749o761-784i	ExpAA=203.93	First60=12.53	PredHel=9	Topology=o50-81i215-237o252-274i602-621o636-654i667-689o704-721i728-750o765-784i
Rv0909	CONSERVED HYPOTHETICAL PROTEIN	No Prediction	No Prediction	No Prediction	Plasma membrane	Unknown	0.875548	Rv0909 0 0 i	ExpAA=0.00	First60=0.00	PredHel=0	Topology=o
Rv0912	PROBABLE CONSERVED TRANSMEMBRANE PROTEIN	Not cytoplasm	Not extracellular	plasma membrane	Plasma membrane	CytoplasmicMembrane	0.974127	Rv0912 3 Y n10-21c39/40o55-74i81-101o113-134i	ExpAA=87.16	First60=29.97	PredHel=4	Topology=i7-29o49-71i78-100o115-137i	*
Rv0917	POSSIBLE GLYCINE BETAINE TRANSPORT INTEGRAL MEMBRANE PROTEIN BETP	Not cytoplasm	Not extracellular	plasma membrane	Plasma membrane	CytoplasmicMembrane	0.953613	Rv0917 12 0 i21-41o61-80i100-121o157-175i203-222o242-263i275-299o330-347i359-378o411-430i457-479o485-504i	ExpAA=262.88	First60=25.31	PredHel=12	Topology=i21-43o58-80i99-121o147-169i205-227o242-264i277-299o328-350i359-378o411-433i454-476o481-503i
Rv0924c	DIVALENT CATION-TRANSPORT INTEGRAL MEMBRANE PROTEIN MNTH (BRAMP) (MRAMP)	Not cytoplasm	Not extracellular	plasma membrane	Plasma membrane	CytoplasmicMembrane	0.956523	Rv0924c 11 0 i31-47o62-83i109-134o140-159i171-190o210-229i258-280o300-330i342-360o366-385i405-426o	ExpAA=226.05	First60=19.60	PredHel=10	Topology=o33-55i62-84o136-158i171-190o210-229i258-280o300-322i334-356o366-385i405-427o
Rv0928	PERIPLASMIC PHOSPHATE-BINDING LIPOPROTEIN PSTS3 (PBP-3) (PSTS3) (PHOS1)	Not cytoplasm	Not extracellular	plasma membrane	Extracell	Unknown	0.855563	Rv0928 0 Y n6-16c21/22o	ExpAA=1.54	First60=1.41	PredHel=0	Topology=o	*		*
Rv0929	PHOSPHATE-TRANSPORT INTEGRAL MEMBRANE ABC TRANSPORTER PSTC2	Not cytoplasm	Not extracellular	plasma membrane	Plasma membrane	CytoplasmicMembrane	0.919853	Rv0929 6 0 i25-50o84-110i122-146o171-194i235-258o295-318i	ExpAA=134.71	First60=22.98	PredHel=6	Topology=i28-50o87-109i122-144o172-194i235-257o291-313i
Rv0930	PROBABLE PHOSPHATE-TRANSPORT INTEGRAL MEMBRANE ABC TRANSPORTER PSTA1	Not cytoplasm	Not extracellular	plasma membrane	Plasma membrane	CytoplasmicMembrane	0.932124	Rv0930 6 0 i32-56o93-115i127-151o157-175i207-228o275-300i	ExpAA=134.51	First60=22.91	PredHel=6	Topology=i35-57o93-115i128-150o155-177i207-229o272-294i
Rv0931c	TRANSMEMBRANE SERINE/THREONINE-PROTEIN KINASE D PKND (PROTEIN KINASE D) (STPK D)	Not cytoplasm	Not extracellular	Not plasma membrane	Extracell	CytoplasmicMembrane	0.693605	Rv0931c 1 0 o379-402i	ExpAA=24.39	First60=0.00	PredHel=1	Topology=o380-402i
Rv0932c	PERIPLASMIC PHOSPHATE-BINDING LIPOPROTEIN PSTS2 (PBP-2) (PSTS2)	Not cytoplasm	Not extracellular	plasma membrane	Extracell	Unknown	0.876331	Rv0932c 0 Y n8-20c24/25o	ExpAA=7.77	First60=7.76	PredHel=0	Topology=o	*	*	*
Rv0934	PERIPLASMIC PHOSPHATE-BINDING LIPOPROTEIN PSTS1 (PBP-1) (PSTS1)	Not cytoplasm	Not extracellular	plasma membrane	Extracell	Unknown	0.602163	Rv0934 0 Y n5-15c20/21o	ExpAA=4.99	First60=4.93	PredHel=0	Topology=o	*		*
Rv0935	PHOSPHATE-TRANSPORT INTEGRAL MEMBRANE ABC TRANSPORTER PSTC1	Not cytoplasm	Not extracellular	plasma membrane	Plasma membrane	CytoplasmicMembrane	0.956982	Rv0935 8 0 i21-45o86-113i120-144o150-169i181-198o231-251i263-285o297-320i	ExpAA=161.60	First60=23.32	PredHel=8	Topology=i17-39o90-112i124-146o150-172i179-201o230-252i259-281o301-320i
Rv0936	PHOSPHATE-TRANSPORT INTEGRAL MEMBRANE ABC TRANSPORTER PSTA2	Not cytoplasm	Not extracellular	plasma membrane	Plasma membrane	CytoplasmicMembrane	0.950632	Rv0936 6 0 i31-53o82-108i120-143o149-169i209-230o273-291i	ExpAA=133.14	First60=23.03	PredHel=6	Topology=i31-53o87-109i122-144o149-168i209-231o273-295i
Rv0954	PROBABLE CONSERVED TRANSMEMBRANE PROTEIN	Not cytoplasm	Not extracellular	plasma membrane	Extracell	CytoplasmicMembrane	0.978982	Rv0954 4 0 i38-57o77-96i103-120o132-154i	ExpAA=85.42	First60=20.75	PredHel=4	Topology=i40-62o77-96i103-122o132-154i
Rv0955	PROBABLE CONSERVED INTEGRAL MEMBRANE PROTEIN	Not cytoplasm	Not extracellular	plasma membrane	Plasma membrane	CytoplasmicMembrane	0.963053	Rv0955 10 0 i21-46o66-90i111-131o146-169i190-214o226-251i258-282o288-306i313-337o357-380i	ExpAA=224.31	First60=24.14	PredHel=10	Topology=i25-47o67-89i109-131o146-168i189-211o231-253i260-282o287-306i319-341o356-378i
Rv0961	PROBABLE INTEGRAL MEMBRANE PROTEIN	Not cytoplasm	Not extracellular	plasma membrane	Plasma membrane	CytoplasmicMembrane	0.964842	Rv0961 3 0 i20-45o65-83i90-110o	ExpAA=67.69	First60=24.95	PredHel=3	Topology=i21-43o58-80i92-114o
Rv0962c	POSSIBLE LIPOPROTEIN LPRP	Not cytoplasm	Not extracellular	plasma membrane	Extracell	Unknown	0.826095	Rv0962c 0 Y n7-18c22/23o	ExpAA=5.32	First60=5.32	PredHel=0	Topology=o	*		*
Rv0969	PROBABLE METAL CATION TRANSPORTER P-TYPE ATPASE CTPV	Not cytoplasm	Not extracellular	plasma membrane	Plasma membrane	CytoplasmicMembrane	0.713633	Rv0969 8 0 i141-160o166-184i196-215o221-238i375-397o403-424i714-734o740-758i	ExpAA=159.06	First60=0.01	PredHel=6	Topology=i141-163o216-238i375-397o402-424i718-737o741-760i
Rv0970	PROBABLE CONSERVED INTEGRAL MEMBRANE PROTEIN	Not cytoplasm	Not extracellular	plasma membrane	Plasma membrane	CytoplasmicMembrane	0.976388	Rv0970 6 0 o6-28i35-54o66-84i91-108o149-174i186-208o	ExpAA=129.07	First60=44.27	PredHel=6	Topology=o6-28i35-57o62-84i91-109o149-171i184-206o
Rv0977	PE-PGRS FAMILY PROTEIN	Not cytoplasm	Not extracellular	Not plasma membrane	Extracell	Extracellular	0.859148	Rv0977 0 Y n3-14c32/33o	ExpAA=0.51	First60=0.14	PredHel=0	Topology=o	*
Rv0978c	PE-PGRS FAMILY PROTEIN	Not cytoplasm	Not extracellular	plasma membrane	Extracell	Extracellular	0.77068	Rv0978c 0 0 i	ExpAA=1.36	First60=0.02	PredHel=0	Topology=o	*
Rv0980c	PE-PGRS FAMILY PROTEIN	Not cytoplasm	Not extracellular	plasma membrane	Extracell	Extracellular	0.834385	Rv0980c 0 0 i	ExpAA=0.19	First60=0.02	PredHel=0	Topology=o	*
Rv0983	PROBABLE SERINE PROTEASE PEPD (SERINE PROTEINASE) (MTB32B)	Not cytoplasm	Not extracellular	Not plasma membrane	Extracell	Unknown	0.860708	Rv0983 1 0 i102-126o	ExpAA=22.44	First60=0.00	PredHel=1	Topology=i102-124o
Rv0985c	Rv0985c	Not cytoplasm	Not extracellular	plasma membrane	Plasma membrane	CytoplasmicMembrane	0.876624	Rv0985c 2 0 i12-32o71-92i	ExpAA=43.24	First60=21.00	PredHel=2	Topology=i13-32o69-91i
Rv0987	PROBABLE ADHESION COMPONENT TRANSPORT TRANSMEMBRANE PROTEIN ABC TRANSPORTER	Not cytoplasm	Not extracellular	plasma membrane	Plasma membrane	CytoplasmicMembrane	0.775035	Rv0987 10 0 i27-44o261-284i304-330o361-383i404-424o430-448i486-509o727-748i769-800o820-841i	ExpAA=230.44	First60=21.19	PredHel=10	Topology=i25-47o262-284i304-326o361-383i404-426o430-452i482-504o723-745i777-799o819-841i
Rv0988	POSSIBLE CONSERVED EXPORTED PROTEIN	cytoplasm	Not extracellular	Not plasma membrane	Extracell	Unknown	0.628998	Rv0988 0 Y n4-15c19/20o	ExpAA=19.14	First60=19.10	PredHel=1	Topology=i5-23o	*
Rv0991c	CONSERVED HYPOTHETICAL SERINE RICH PROTEIN	Not cytoplasm	extracellular	Not plasma membrane	Extracell	Unknown	0.858608	Rv0991c 0 0 i	ExpAA=0.05	First60=0.05	PredHel=0	Topology=o
Rv0996	PROBABLE CONSERVED TRANSMEMBRANE PROTEIN	Not cytoplasm	extracellular	Not plasma membrane	Cytoplasm	CytoplasmicMembrane	0.897962	Rv0996 3 0 o6-26i237-253o259-277i	ExpAA=59.94	First60=21.88	PredHel=3	Topology=o4-26i236-253o258-277i
Rv1000	CONSERVED HYPOTHETICAL PROTEIN. THOUGHT TO BE REGULATED BY Rv2720|LEXA.	No Prediction	No Prediction	No Prediction	Plasma membrane	Unknown	0.574027	Rv1000 0 0 i	ExpAA=0.02	First60=0.01	PredHel=0	Topology=i
Rv1002c	CONSERVED MEMBRANE PROTEIN	Not cytoplasm	Not extracellular	plasma membrane	Plasma membrane	CytoplasmicMembrane	0.920455	Rv1002c 11 0 i22-41o103-124i131-149o155-173i185-202o222-241i262-283o378-395i402-418o424-448i460-480o	ExpAA=200.58	First60=9.12	PredHel=8	Topology=o102-124i131-150o154-173i207-229o260-282i400-417o427-449i462-484o
Rv1006	HYPOTHETICAL PROTEIN	Not cytoplasm	Not extracellular	plasma membrane	Extracell	Unknown	0.884666	Rv1006 0 Y n10-21c26/27o	ExpAA=3.88	First60=3.88	PredHel=0	Topology=o	*	*	*
Rv1024	POSSIBLE CONSERVED MEMBRANE PROTEIN	cytoplasm	Not extracellular	plasma membrane	Cytoplasm	Cytoplasmic	0.523326	Rv1024 1 0 i80-98o	ExpAA=16.72	First60=0.00	PredHel=0	Topology=o		*
Rv1029	Probable Potassium-transporting ATPase A chain KDPA (Potassium-translocating ATPase A chain) (ATP phosphohydrolase [potassium-transporting] A chain) (Potassium binding and translocating subunit A)	Not cytoplasm	Not extracellular	plasma membrane	Plasma membrane	CytoplasmicMembrane	0.93502	Rv1029 10 0 o6-28i67-86o138-157i178-200o262-279i286-306o390-410i431-455o497-517i538-565o	ExpAA=222.49	First60=22.63	PredHel=10	Topology=o5-27i64-86o135-157i178-200o262-279i286-308o386-408i428-450o497-519i539-561o	*
Rv1030	Probable Potassium-transporting P-type ATPase B chain KDPB (Potassium-translocating ATPase B chain) (ATP phosphohydrolase [potassium-transporting] B chain) (Potassium binding and translocating subunit B)	Not cytoplasm	Not extracellular	plasma membrane	Plasma membrane	CytoplasmicMembrane	0.784486	Rv1030 7 0 i53-71o83-102i236-257o269-293i611-629o641-661i681-708o	ExpAA=150.06	First60=7.97	PredHel=7	Topology=i53-72o82-104i239-261o271-293i611-629o644-666i686-708o
Rv1046c	HYPOTHETICAL PROTEIN	cytoplasm	extracellular	Not plasma membrane	Extracell	Unknown	0.810353	Rv1046c 0 0 i	ExpAA=0.00	First60=0.00	PredHel=0	Topology=o
Rv1053c	HYPOTHETICAL PROTEIN	No Prediction	No Prediction	No Prediction	Cytoplasm	Cytoplasmic	0.705168	Rv1053c 0 0 i	ExpAA=0.00	First60=0.00	PredHel=0	Topology=i
Rv1067c	PE-PGRS FAMILY PROTEIN	Not cytoplasm	Not extracellular	plasma membrane	Extracell	Extracellular	0.836974	Rv1067c 0 Y n3-14c32/33o	ExpAA=0.79	First60=0.71	PredHel=0	Topology=o	*
Rv1068c	PE-PGRS FAMILY PROTEIN	Not cytoplasm	Not extracellular	plasma membrane	Extracell	Extracellular	0.878766	Rv1068c 0 0 i	ExpAA=0.05	First60=0.00	PredHel=0	Topology=o
Rv1069c	CONSERVED HYPOTHETICAL PROTEIN	No Prediction	No Prediction	No Prediction	Cytoplasm	CytoplasmicMembrane	0.812652	Rv1069c 5 0 i42-61o73-97i117-135o155-178i190-215o	ExpAA=110.95	First60=17.34	PredHel=5	Topology=i42-64o77-99i112-134o156-178i191-213o
Rv1072	PROBABLE CONSERVED TRANSMEMBRANE PROTEIN	Not cytoplasm	Not extracellular	plasma membrane	Plasma membrane	CytoplasmicMembrane	0.969652	Rv1072 7 0 i54-76o82-101i113-135o141-162i174-196o216-237i249-266o	ExpAA=153.14	First60=5.18	PredHel=7	Topology=i54-76o80-102i109-131o141-163i176-198o213-232i252-274o
Rv1078	Probable Proline-rich antigen homolog pra	cytoplasm	Not extracellular	Not plasma membrane	Extracell	CytoplasmicMembrane	0.969634	Rv1078 3 0 i102-123o143-162i203-221o	ExpAA=60.62	First60=0.00	PredHel=2	Topology=i95-117o199-221i
Rv1080c	PROBABLE TRANSCRIPTION ELONGATION FACTOR GREA (Transcript cleavage factor greA)	cytoplasm	Not extracellular	Not plasma membrane	Cytoplasm	Unknown	0.868925	Rv1080c 0 0 i	ExpAA=0.00	First60=0.00	PredHel=0	Topology=o
Rv1083	CONSERVED HYPOTHETICAL PROTEIN	No Prediction	No Prediction	No Prediction	Extracell	Unknown	0.922149	Rv1083 1 0 o24-43i	ExpAA=20.14	First60=20.14	PredHel=1	Topology=o24-43i
Rv1085c	POSSIBLE HEMOLYSIN-LIKE PROTEIN	Not cytoplasm	Not extracellular	plasma membrane	Plasma membrane	CytoplasmicMembrane	0.976074	Rv1085c 7 0 o40-62i69-88o108-126i133-155o161-179i186-206o221-241i	ExpAA=148.22	First60=21.25	PredHel=7	Topology=i39-61o71-88i109-128o133-155i160-179o184-206i219-241o
Rv1087	CONSERVED HYPOTHETICAL PROTEIN	Not cytoplasm	Not extracellular	Not plasma membrane	Extracell	Extracellular	0.781853	Rv1087 0 Y n3-14c26/27o	ExpAA=1.06	First60=0.22	PredHel=0	Topology=o	*
Rv1089	PROBABLE CELLULASE CELA2A (ENDO-1,4-BETA-GLUCANASE) (ENDOGLUCANASE) (CARBOXYMETHYL CELLULASE)	Not cytoplasm	Not extracellular	plasma membrane	Extracell	Extracellular	0.800761	Rv1089 0 0 i	ExpAA=0.14	First60=0.00	PredHel=0	Topology=o		*
Rv1090	PROBABLE CELLULASE CELA2B (ENDO-1,4-BETA-GLUCANASE) (ENDOGLUCANASE) (CARBOXYMETHYL CELLULASE)	Not cytoplasm	extracellular	Not plasma membrane	Extracell	Unknown	0.899687	Rv1090 0 0 i	ExpAA=0.00	First60=0.00	PredHel=0	Topology=o
Rv1091	PE-PGRS FAMILY PROTEIN	Not cytoplasm	Not extracellular	Not plasma membrane	Extracell	Extracellular	0.828384	Rv1091 0 Y n3-14c26/27o	ExpAA=0.28	First60=0.24	PredHel=0	Topology=o	*
Rv1096	POSSIBLE GLYCOSYL HYDROLASE	Not cytoplasm	Not extracellular	Not plasma membrane	Extracell	Unknown	0.800833	Rv1096 1 0 i12-33o	ExpAA=20.68	First60=20.61	PredHel=1	Topology=i12-31o	*
Rv1097c	PROBABLE MEMBRANE GLYCINE AND PROLINE RICH PROTEIN	Not cytoplasm	extracellular	Not plasma membrane	Extracell	Unknown	0.963591	Rv1097c 1 0 o67-89i	ExpAA=22.93	First60=0.00	PredHel=1	Topology=o67-89i
Rv1100	CONSERVED HYPOTHETICAL PROTEIN	Not cytoplasm	Not extracellular	Not plasma membrane	Extracell	Unknown	0.910257	Rv1100 1 0 o42-65i	ExpAA=21.89	First60=17.71	PredHel=1	Topology=i43-65o
Rv1101c	CONSERVED MEMBRANE PROTEIN	Not cytoplasm	Not extracellular	plasma membrane	Plasma membrane	CytoplasmicMembrane	0.93349	Rv1101c 8 0 i12-28o34-52i64-89o156-179i214-235o241-263i270-290o310-340i	ExpAA=174.46	First60=38.34	PredHel=8	Topology=i12-27o31-53i66-88o157-179i214-236o241-263i270-292o317-339i	*
Rv1111c	CONSERVED HYPOTHETICAL PROTEIN	Not cytoplasm	Not extracellular	Not plasma membrane	Cytoplasm	CytoplasmicMembrane	0.952839	Rv1111c 3 Y n3-14c19/20o29-48i60-78o98-118i	ExpAA=83.27	First60=45.82	PredHel=4	Topology=i2-19o29-48i53-75o97-119i
Rv1115	POSSIBLE EXPORTED PROTEIN	Not cytoplasm	extracellular	Not plasma membrane	Extracell	Unknown	0.760183	Rv1115 1 0 i9-30o	ExpAA=23.23	First60=22.47	PredHel=1	Topology=i9-31o	*
Rv1116	HYPOTHETICAL PROTEIN	Not cytoplasm	Not extracellular	plasma membrane	Cytoplasm	Cytoplasmic	0.85398	Rv1116 0 0 i	ExpAA=0.00	First60=0.00	PredHel=0	Topology=i
Rv1119c	HYPOTHETICAL PROTEIN	No Prediction	No Prediction	No Prediction	Short sequence	Unknown	0.501785	Rv1119c 0 0 i	ExpAA=0.00	First60=0.00	PredHel=0	Topology=i
Rv1132	CONSERVED MEMBRANE PROTEIN	No Prediction	No Prediction	No Prediction	Plasma membrane	CytoplasmicMembrane	0.880613	Rv1132 9 0 o41-62i148-168o180-198i210-242o248-266i287-310o316-337i344-363o369-389i	ExpAA=183.78	First60=19.92	PredHel=8	Topology=o41-63i148-170o175-197i218-240o287-309i316-338o343-362i369-388o
Rv1135c	PPE FAMILY PROTEIN	Not cytoplasm	Not extracellular	plasma membrane	Extracell	Extracellular	0.827665	Rv1135c 0 0 i	ExpAA=0.97	First60=0.81	PredHel=0	Topology=o	*
Rv1137c	HYPOTHETICAL PROTEIN	Not cytoplasm	Not extracellular	plasma membrane	Extracell	Unknown	0.527884	Rv1137c 0 0 i	ExpAA=0.00	First60=0.00	PredHel=0	Topology=o
Rv1139c	CONSERVED HYPOTHETICAL MEMBRANE PROTEIN	Not cytoplasm	Not extracellular	plasma membrane	Plasma membrane	CytoplasmicMembrane	0.951449	Rv1139c 3 Y n4-11c15/16o39-61i68-86o121-147i	ExpAA=67.44	First60=21.92	PredHel=3	Topology=i39-61o66-88i122-144o
Rv1140	PROBABLE INTEGRAL MEMBRANE PROTEIN	Not cytoplasm	Not extracellular	plasma membrane	Plasma membrane	CytoplasmicMembrane	0.963806	Rv1140 6 0 i81-101o107-131i143-168o180-199i220-246o258-280i	ExpAA=130.61	First60=0.00	PredHel=6	Topology=i81-98o108-130i143-165o180-199i220-242o257-279i
Rv1145	PROBABLE CONSERVED TRANSMEMBRANE TRANSPORT PROTEIN MMPL13A	Not cytoplasm	Not extracellular	plasma membrane	Plasma membrane	CytoplasmicMembrane	0.783976	Rv1145 3 Y n16-26c31/32o178-203i210-227o233-254i	ExpAA=82.16	First60=21.09	PredHel=4	Topology=i16-35o183-205i210-227o232-254i	*
Rv1146	PROBABLE CONSERVED TRANSMEMBRANE TRANSPORT PROTEIN MMPL13B	Not cytoplasm	Not extracellular	plasma membrane	Plasma membrane	CytoplasmicMembrane	0.813941	Rv1146 7 0 o6-26i65-84o234-256i261-279o299-319i360-380o386-405i	ExpAA=144.10	First60=21.43	PredHel=6	Topology=o4-26i64-86o234-256i261-280o295-317i360-382o	*
Rv1150	SIBLE TRANSPOSASE (FRAGMENT)	cytoplasm	Not extracellular	Not plasma membrane	Cytoplasm	Cytoplasmic	0.881778	Rv1150 1 0 i155-174o	ExpAA=19.76	First60=0.00	PredHel=1	Topology=i155-174o
Rv1157c	CONSERVED HYPOTHETICAL ALA-, PRO-RICH PROTEIN	Not cytoplasm	extracellular	Not plasma membrane	Extracell	Unknown	0.67871	Rv1157c 0 Y n24-39c44/45o	ExpAA=10.00	First60=9.92	PredHel=0	Topology=o	*
Rv1158c	CONSERVED HYPOTHETICAL ALA-, PRO-RICH PROTEIN	Not cytoplasm	extracellular	Not plasma membrane	Extracell	Unknown	0.816674	Rv1158c 0 Y n10-21c29/30o	ExpAA=15.43	First60=15.29	PredHel=1	Topology=i7-29o	*
Rv1159	HYPOTHETICAL PROTEIN	Not cytoplasm	Not extracellular	plasma membrane	Plasma membrane	CytoplasmicMembrane	0.964414	Rv1159 10 0 i41-61o112-137i149-168o174-193i200-223o229-248i291-310o330-352i364-384o396-417i	ExpAA=207.04	First60=16.59	PredHel=10	Topology=i43-62o110-132i145-167o177-194i201-223o227-249i290-312o322-344i364-381o396-418i
Rv1164	PROBABLE RESPIRATORY NITRATE REDUCTASE (GAMMA CHAIN) NARI	Not cytoplasm	Not extracellular	plasma membrane	Plasma membrane	CytoplasmicMembrane	0.952925	Rv1164 5 0 o6-28i49-74o94-113i133-152o186-204i	ExpAA=110.67	First60=31.51	PredHel=5	Topology=o10-28i49-71o91-113i133-152o180-202i
Rv1171	CONSERVED HYPOTHETICAL PROTEIN	Not cytoplasm	Not extracellular	plasma membrane	Plasma membrane	CytoplasmicMembrane	0.979696	Rv1171 3 Y n2-9c15/16o31-50i57-77o89-110i	ExpAA=83.92	First60=44.12	PredHel=4	Topology=i2-24o28-50i57-79o89-111i	*
Rv1183	PROBABLE CONSERVED TRANSMEMBRANE TRANSPORT PROTEIN MMPL10	Not cytoplasm	Not extracellular	plasma membrane	Plasma membrane	CytoplasmicMembrane	0.707379	Rv1183 11 Y n2-12c20/21o171-189i196-223o229-251i272-293o305-327i357-378o803-822i829-854o860-882i903-924o930	ExpAA=246.02	First60=5.15	PredHel=11	Topology=o172-189i196-218o228-247i268-290o305-327i358-380o805-827i832-854o859-881i902-924o929-948i
Rv1184c	POSSIBLE EXPORTED PROTEIN	Not cytoplasm	Not extracellular	plasma membrane	Extracell	Unknown	0.877348	Rv1184c 0 Y n4-17c25/26o	ExpAA=20.72	First60=20.56	PredHel=1	Topology=i5-27o	*	*
Rv1200	PROBABLE CONSERVED INTEGRAL MEMBRANE TRANSPORT PROTEIN	Not cytoplasm	Not extracellular	plasma membrane	Plasma membrane	CytoplasmicMembrane	0.974324	Rv1200 11 Y n4-14c26/27o42-68i80-108o114-135i142-163o183-202i237-259o271-291i303-322o328-346i367-388o394-415i	ExpAA=264.85	First60=37.95	PredHel=12	Topology=i13-35o50-69i82-104o114-136i143-165o180-202i236-258o273-295i302-321o331-353i366-388o393-415i
Rv1216c	PROBABLE CONSERVED INTEGRAL MEMBRANE PROTEIN	Not cytoplasm	Not extracellular	plasma membrane	Plasma membrane	CytoplasmicMembrane	0.954909	Rv1216c 5 0 i7-26o32-53i74-93o105-129i176-195o	ExpAA=109.56	First60=43.34	PredHel=5	Topology=i7-29o34-53i74-92o107-129i160-182o	*
Rv1217c	PROBABLE TETRONASIN-TRANSPORT INTEGRAL MEMBRANE PROTEIN ABC TRANSPORTER	Not cytoplasm	Not extracellular	plasma membrane	Plasma membrane	CytoplasmicMembrane	0.957283	Rv1217c 12 0 i39-58o100-121i142-169o175-198i210-233o253-271i312-334o359-381i410-432o452-470i477-498o518-541i	ExpAA=265.58	First60=20.17	PredHel=12	Topology=i41-60o97-119i140-162o177-199i211-233o253-275i311-333o359-381i410-432o447-469i476-498o518-540i
Rv1223	PROBABLE SERINE PROTEASE HTRA (DEGP PROTEIN)	Not cytoplasm	Not extracellular	plasma membrane	Cytoplasm	Unknown	0.599927	Rv1223 1 0 i199-219o	ExpAA=22.76	First60=0.00	PredHel=1	Topology=i197-219o
Rv1224	Probable protein TatB	Not cytoplasm	Not extracellular	plasma membrane	Cytoplasm	Unknown	0.8165	Rv1224 0 Y n11-22c40/41o	ExpAA=16.56	First60=16.56	PredHel=1	Topology=o5-22i
Rv1226c	PROBABLE TRANSMEMBRANE PROTEIN	Not cytoplasm	Not extracellular	plasma membrane	Cytoplasm	CytoplasmicMembrane	0.783483	Rv1226c 5 0 o45-64i165-187o207-240i349-369o375-392i	ExpAA=105.37	First60=17.63	PredHel=5	Topology=o45-64i165-187o216-238i349-371o375-392i
Rv1227c	PROBABLE TRANSMEMBRANE PROTEIN	No Prediction	No Prediction	No Prediction	Plasma membrane	Unknown	0.92468	Rv1227c 2 0 i33-56o62-85i	ExpAA=49.02	First60=22.37	PredHel=2	Topology=i33-55o65-87i
Rv1230c	POSSIBLE MEMBRANE PROTEIN	Not cytoplasm	Not extracellular	Not plasma membrane	Extracell	CytoplasmicMembrane	0.887941	Rv1230c 2 0 i26-47o59-80i	ExpAA=49.61	First60=23.54	PredHel=2	Topology=i27-49o59-81i		*
Rv1231c	PROBABLE MEMBRANE PROTEIN	Not cytoplasm	Not extracellular	Not plasma membrane	Cytoplasm	Unknown	0.937849	Rv1231c 2 0 i44-67o73-93i	ExpAA=44.42	First60=17.26	PredHel=2	Topology=i44-66o71-93i
Rv1233c	CONSERVED HYPOTHETICAL MEMBRANE PROTEIN	cytoplasm	Not extracellular	Not plasma membrane	Extracell	Unknown	0.969281	Rv1233c 2 0 o134-160i172-197o	ExpAA=46.72	First60=0.00	PredHel=2	Topology=o137-159i172-194o		*
Rv1234	PROBABLE TRANSMEMBRANE PROTEIN	Not cytoplasm	Not extracellular	plasma membrane	Extracell	Unknown	0.936608	Rv1234 2 0 i85-107o113-137i	ExpAA=45.30	First60=0.00	PredHel=2	Topology=i85-107o112-134i		*
Rv1236	PROBABLE SUGAR-TRANSPORT INTEGRAL MEMBRANE PROTEIN ABC TRANSPORTER SUGA	Not cytoplasm	Not extracellular	plasma membrane	Plasma membrane	CytoplasmicMembrane	0.876723	Rv1236 6 0 i25-50o80-110i122-142o176-195i216-234o270-292i	ExpAA=130.64	First60=22.97	PredHel=5	Topology=i25-47o87-109i122-144o216-234i270-292o	*	*
Rv1237	PROBABLE SUGAR-TRANSPORT INTEGRAL MEMBRANE PROTEIN ABC TRANSPORTER SUGB	Not cytoplasm	Not extracellular	plasma membrane	Plasma membrane	CytoplasmicMembrane	0.952638	Rv1237 6 0 i7-28o65-89i101-122o134-157i178-203o241-259i	ExpAA=138.35	First60=22.58	PredHel=6	Topology=i7-29o70-92i101-123o138-160i181-203o237-259i
Rv1239c	POSSIBLE MAGNESIUM AND COBALT TRANSPORT TRANSMEMBRANE PROTEIN CORA	Not cytoplasm	Not extracellular	plasma membrane	Cytoplasm	Cytoplasmic	0.762542	Rv1239c 2 0 i309-328o340-360i	ExpAA=42.49	First60=0.08	PredHel=2	Topology=i309-328o338-360i
Rv1243c	PE-PGRS FAMILY PROTEIN	Not cytoplasm	Not extracellular	plasma membrane	Extracell	Extracellular	0.890188	Rv1243c 0 0 i	ExpAA=0.03	First60=0.02	PredHel=0	Topology=o
Rv1249c	POSSIBLE MEMBRANE PROTEIN	Not cytoplasm	Not extracellular	plasma membrane	Plasma membrane	CytoplasmicMembrane	0.829101	Rv1249c 3 0 i82-109o115-135i206-225o	ExpAA=71.36	First60=0.00	PredHel=3	Topology=i83-105o115-137i207-229o
Rv1250	PROBABLE DRUG-TRANSPORT INTEGRAL MEMBRANE PROTEIN	Not cytoplasm	Not extracellular	plasma membrane	Plasma membrane	CytoplasmicMembrane	0.958068	Rv1250 13 0 o20-41i53-74o86-113i143-162o174-194i206-223o235-254i275-297o309-329i336-354o366-389i410-429o467	ExpAA=273.07	First60=32.19	PredHel=12	Topology=o20-42i49-71o86-108i143-165o175-197i204-223o233-252i275-297o307-329i336-353o363-385i468-490o	*
Rv1252c	PROBABLE LIPOPROTEIN LPRE	Not cytoplasm	Not extracellular	plasma membrane	Extracell	Unknown	0.888716	Rv1252c 0 0 i	ExpAA=1.95	First60=1.94	PredHel=0	Topology=o			*
Rv1254	PROBABLE ACYLTRANSFERASE	Not cytoplasm	Not extracellular	plasma membrane	Plasma membrane	CytoplasmicMembrane	0.9668	Rv1254 10 0 i21-42o62-80i100-118o160-181i193-212o224-243i250-271o283-303i324-346o352-371i	ExpAA=213.46	First60=24.47	PredHel=10	Topology=i25-44o59-76i103-120o163-185i192-211o221-243i250-272o287-304i317-339o349-371i
Rv1258c	PROBABLE CONSERVED INTEGRAL MEMBRANE TRANSPORT PROTEIN	Not cytoplasm	Not extracellular	plasma membrane	Plasma membrane	CytoplasmicMembrane	0.974937	Rv1258c 12 0 i12-34o46-69i76-97o103-123i144-168o174-193i224-242o262-282i289-308o314-336i348-368o374-395i	ExpAA=260.37	First60=40.63	PredHel=12	Topology=i7-29o44-66i73-95o100-122i149-171o175-197i218-240o260-282i289-308o313-335i348-370o375-397i	*
Rv1261c	CONSERVED HYPOTHETICAL PROTEIN	Not cytoplasm	Not extracellular	plasma membrane	Cytoplasm	Cytoplasmic	0.748937	Rv1261c 0 0 i	ExpAA=0.00	First60=0.00	PredHel=0	Topology=o
Rv1266c	PROBABLE TRANSMEMBRANE SERINE/THREONINE-PROTEIN KINASE H PKNH (PROTEIN KINASE H) (STPK H)	Not cytoplasm	Not extracellular	plasma membrane	Cytoplasm	Cytoplasmic	0.875147	Rv1266c 1 0 o402-426i	ExpAA=22.64	First60=0.00	PredHel=1	Topology=i404-426o
Rv1268c	HYPOTHETICAL PROTEIN	Not cytoplasm	Not extracellular	plasma membrane	Cytoplasm	Unknown	0.758959	Rv1268c 0 Y n13-24c32/33o	ExpAA=18.39	First60=18.31	PredHel=1	Topology=i13-35o	*	*
Rv1269c	CONSERVED PROBABLE SECRETED PROTEIN	Not cytoplasm	Not extracellular	plasma membrane	Extracell	Unknown	0.509083	Rv1269c 0 Y n12-23c35/36o	ExpAA=17.70	First60=17.66	PredHel=0	Topology=i	*	*
Rv1270c	POSSIBLE LIPOPROTEIN LPRA	Not cytoplasm	Not extracellular	plasma membrane	Extracell	CytoplasmicMembrane	0.909663	Rv1270c 0 Y n6-16c21/22o	ExpAA=16.22	First60=16.21	PredHel=1	Topology=i7-24o	*		*
Rv1271c	CONSERVED HYPOTHETICAL SECRETED PROTEIN	Not cytoplasm	extracellular	Not plasma membrane	Extracell	Unknown	0.934503	Rv1271c 0 Y n9-24c29/30o	ExpAA=21.64	First60=21.63	PredHel=1	Topology=o10-32i	*
Rv1273c	PROBABLE DRUGS-TRANSPORT TRANSMEMBRANE ATP-BINDING PROTEIN ABC TRANSPORTER	Not cytoplasm	Not extracellular	plasma membrane	Plasma membrane	CytoplasmicMembrane	0.636551	Rv1273c 5 Y n23-34c39/40o55-78i125-151o157-176i239-259o271-298i	ExpAA=134.72	First60=27.93	PredHel=6	Topology=o20-42i54-76o126-148i155-177o240-262i275-297o	*
Rv1282c	PROBABLE OLIGOPEPTIDE-TRANSPORT INTEGRAL MEMBRANE PROTEIN ABC TRANSPORTER OPPC	Not cytoplasm	Not extracellular	plasma membrane	Plasma membrane	CytoplasmicMembrane	0.951199	Rv1282c 5 Y n20-32c37/38o85-109i116-137o143-165i208-229o249-270i	ExpAA=132.38	First60=22.23	PredHel=6	Topology=i20-42o87-109i116-138o143-165i196-218o248-270i	*
Rv1283c	PROBABLE OLIGOPEPTIDE-TRANSPORT INTEGRAL MEMBRANE PROTEIN ABC TRANSPORTER OPPB	Not cytoplasm	Not extracellular	plasma membrane	Plasma membrane	CytoplasmicMembrane	0.925168	Rv1283c 6 0 i12-31o101-122i134-156o189-207i246-272o292-318i	ExpAA=132.07	First60=22.44	PredHel=6	Topology=i9-31o100-122i135-157o189-208i246-268o292-314i	*		*
Rv1290c	CONSERVED HYPOTHETICAL PROTEIN	Not cytoplasm	Not extracellular	plasma membrane	Plasma membrane	CytoplasmicMembrane	0.765615	Rv1290c 4 0 i68-93o113-139i160-180o192-212i	ExpAA=106.84	First60=0.16	PredHel=5	Topology=i69-91o113-135i156-178o193-215i288-310o		*
Rv1291c	CONSERVED HYPOTHETICAL SECRETED PROTEIN	Not cytoplasm	extracellular	Not plasma membrane	Extracell	Unknown	0.602449	Rv1291c 0 Y n14-25c33/34o	ExpAA=18.51	First60=18.50	PredHel=1	Topology=i7-29o	*	*
Rv1298	PROBABLE 50S RIBOSOMAL PROTEIN L31 RPME	cytoplasm	Not extracellular	Not plasma membrane	Cytoplasm	Unknown	0.676535	Rv1298 0 0 i	ExpAA=0.00	First60=0.00	PredHel=0	Topology=o
Rv1302	PROBABLE UNDECAPAPRENYL-PHOSPHATE ALPHA-N-ACETYLGLUCOSAMINYLTRANSFERASE RFE (UDP-GlcNAc TRANSFERASE)	Not cytoplasm	Not extracellular	plasma membrane	Plasma membrane	CytoplasmicMembrane	0.970775	Rv1302 11 0 o33-55i76-96o102-125i137-159o171-192i199-219o225-245i257-277o289-315i346-367o373-392i	ExpAA=241.64	First60=26.96	PredHel=11	Topology=o34-56i77-99o103-125i146-168o172-191i198-217o227-249i261-283o293-315i346-368o373-392i
Rv1303	CONSERVED HYPOTHETICAL TRANSMEMBRANE PROTEIN	Not cytoplasm	Not extracellular	plasma membrane	Plasma membrane	CytoplasmicMembrane	0.961139	Rv1303 4 0 i20-40o46-64i85-103o109-130i	ExpAA=82.54	First60=36.89	PredHel=4	Topology=i20-42o46-63i84-103o108-130i
Rv1304	PROBABLE ATP SYNTHASE A CHAIN ATPB (PROTEIN 6)	Not cytoplasm	Not extracellular	plasma membrane	Plasma membrane	CytoplasmicMembrane	0.931252	Rv1304 5 0 o29-47i86-109o129-149i187-208o214-239i	ExpAA=108.34	First60=20.09	PredHel=5	Topology=o30-47i85-107o127-149i189-211o221-240i
Rv1305	PROBABLE ATP SYNTHASE C CHAIN ATPE (LIPID-BINDING PROTEIN) (DICYCLOHEXYLCARBODIIMIDE-BINDING PROTEIN)	Not cytoplasm	Not extracellular	plasma membrane	Plasma membrane	Unknown	0.962008	Rv1305 1 Y n4-15c23/24o53-77i	ExpAA=45.75	First60=29.75	PredHel=2	Topology=i5-27o54-76i	*
Rv1312	CONSERVED HYPOTHETICAL SECRETED PROTEIN	Not cytoplasm	Not extracellular	plasma membrane	Cytoplasm	Cytoplasmic	0.703368	Rv1312 1 0 o6-27i	ExpAA=22.11	First60=22.10	PredHel=1	Topology=o5-27i	*
Rv1318c	POSSIBLE ADENYLATE CYCLASE (ATP PYROPHOSPHATE-LYASE) (ADENYLYL CYCLASE)	Not cytoplasm	Not extracellular	plasma membrane	Plasma membrane	CytoplasmicMembrane	0.843225	Rv1318c 6 0 i52-77o89-110i142-163o169-189i221-241o253-278i	ExpAA=134.55	First60=7.39	PredHel=6	Topology=i52-74o89-111i142-164o168-190i222-241o256-278i
Rv1319c	POSSIBLE ADENYLATE CYCLASE (ATP PYROPHOSPHATE-LYASE) (ADENYLYL CYCLASE)	Not cytoplasm	Not extracellular	plasma membrane	Plasma membrane	CytoplasmicMembrane	0.868878	Rv1319c 6 0 i54-77o89-110i143-162o168-192i222-245o257-279i	ExpAA=135.88	First60=6.63	PredHel=6	Topology=i53-75o88-110i143-165o169-191i224-246o256-278i
Rv1320c	POSSIBLE ADENYLATE CYCLASE (ATP PYROPHOSPHATE-LYASE) (ADENYLYL CYCLASE)	Not cytoplasm	Not extracellular	plasma membrane	Cytoplasm	CytoplasmicMembrane	0.85554	Rv1320c 6 0 i54-77o89-110i142-160o172-195i216-241o253-278i	ExpAA=134.20	First60=7.15	PredHel=6	Topology=i52-74o89-111i142-164o168-190i221-240o255-277i
Rv1322	CONSERVED HYPOTHETICAL PROTEIN	cytoplasm	Not extracellular	Not plasma membrane	Cytoplasm	Unknown	0.831095	Rv1322 0 0 i	ExpAA=0.00	First60=0.00	PredHel=0	Topology=i
Rv1325c	PE-PGRS FAMILY PROTEIN	Not cytoplasm	Not extracellular	Not plasma membrane	Extracell	Extracellular	0.757183	Rv1325c 0 0 i	ExpAA=0.35	First60=0.03	PredHel=0	Topology=o
Rv1331	CONSERVED HYPOTHETICAL PROTEIN	No Prediction	No Prediction	No Prediction	Cytoplasm	Unknown	0.523431	Rv1331 0 0 i	ExpAA=0.06	First60=0.06	PredHel=0	Topology=o
Rv1337	PROBABLE INTEGRAL MEMBRANE PROTEIN	Not cytoplasm	Not extracellular	plasma membrane	Plasma membrane	CytoplasmicMembrane	0.970956	Rv1337 6 0 i36-56o76-103i115-134o146-166i173-193o199-220i	ExpAA=128.15	First60=21.10	PredHel=6	Topology=i34-56o90-112i114-136o146-165i172-194o198-220i
Rv1342c	CONSERVED MEMBRANE PROTEIN	Not cytoplasm	Not extracellular	plasma membrane	Plasma membrane	CytoplasmicMembrane	0.966483	Rv1342c 3 0 i30-52o58-81i93-110o	ExpAA=62.72	First60=24.22	PredHel=3	Topology=o30-52i59-81o91-109i
Rv1343c	PROBABLE CONSERVED LIPOPROTEIN LPRD	Not cytoplasm	Not extracellular	plasma membrane	Cytoplasm	Unknown	0.971623	Rv1343c 2 0 i12-30o42-60i	ExpAA=39.67	First60=37.96	PredHel=2	Topology=i9-31o46-64i	*
Rv1352	CONSERVED HYPOTHETICAL PROTEIN	Not cytoplasm	Not extracellular	Not plasma membrane	Extracell	Unknown	0.752341	Rv1352 0 Y n4-15c20/21o	ExpAA=17.14	First60=16.78	PredHel=1	Topology=i5-27o	*	*
Rv1362c	POSSIBLE MEMBRANE PROTEIN	Not cytoplasm	Not extracellular	plasma membrane	Cytoplasm	Unknown	0.939092	Rv1362c 1 0 o65-85i	ExpAA=22.18	First60=0.22	PredHel=1	Topology=i60-82o
Rv1368	PROBABLE CONSERVED LIPOPROTEIN LPRF	Not cytoplasm	Not extracellular	plasma membrane	Cytoplasm	CytoplasmicMembrane	0.907746	Rv1368 0 Y n20-32c37/38o	ExpAA=18.90	First60=18.87	PredHel=1	Topology=i20-37o	*
Rv1371	PROBABLE CONSERVED MEMBRANE PROTEIN	Not cytoplasm	Not extracellular	plasma membrane	Cytoplasm	CytoplasmicMembrane	0.715973	Rv1371 4 0 i149-170o176-199i305-325o331-348i	ExpAA=73.82	First60=0.00	PredHel=2	Topology=i148-167o177-199i
Rv1382	PROBABLE EXPORT OR MEMBRANE PROTEIN	Not cytoplasm	Not extracellular	Not plasma membrane	Plasma membrane	Unknown	0.723982	Rv1382 1 0 o6-28i	ExpAA=24.81	First60=21.75	PredHel=1	Topology=o5-27i	*
Rv1390	PROBABLE DNA-DIRECTED RNA POLYMERASE (OMEGA CHAIN) RPOZ (TRANSCRIPTASE OMEGA CHAIN) (RNA POLYMERASE OMEGA SUBUNIT	cytoplasm	Not extracellular	Not plasma membrane	Cytoplasm	Cytoplasmic	0.630667	Rv1390 0 0 i	ExpAA=0.00	First60=0.00	PredHel=0	Topology=o
Rv1396c	PE-PGRS FAMILY PROTEIN	Not cytoplasm	Not extracellular	Not plasma membrane	Extracell	Extracellular	0.832881	Rv1396c 0 0 i	ExpAA=0.08	First60=0.06	PredHel=0	Topology=o	*
Rv1401	POSSIBLE MEMBRANE PROTEIN	Not cytoplasm	Not extracellular	plasma membrane	Plasma membrane	CytoplasmicMembrane	0.959837	Rv1401 5 Y n8-18c22/23o46-72i84-103o115-132i137-159o165-186i	ExpAA=122.33	First60=25.35	PredHel=5	Topology=o50-72i85-107o112-131i138-160o164-186i
Rv1410c	AMINOGLYCOSIDES/TETRACYCLINE-TRANSPORT INTEGRAL MEMBRANE PROTEIN	Not cytoplasm	Not extracellular	plasma membrane	Plasma membrane	CytoplasmicMembrane	0.969669	Rv1410c 13 Y n7-18c23/24o47-65i77-98o110-130i142-164o170-189i201-222o234-252i272-290o310-329i336-352o379-401i408	ExpAA=304.00	First60=37.79	PredHel=14	Topology=i7-29o44-66i78-99o109-131i138-160o170-189i201-220o230-252i265-287o307-329i336-353o379-401i413-435o470-492i	*
Rv1411c	PROBABLE CONSERVED LIPOPROTEIN LPRG	Not cytoplasm	Not extracellular	plasma membrane	Extracell	CytoplasmicMembrane	0.936778	Rv1411c 0 Y n11-21c26/27o	ExpAA=10.79	First60=10.78	PredHel=0	Topology=i	*		*
Rv1417	POSSIBLE CONSERVED MEMBRANE PROTEIN	Not cytoplasm	Not extracellular	plasma membrane	Plasma membrane	Unknown	0.762302	Rv1417 2 0 o20-42i54-71o	ExpAA=41.01	First60=29.65	PredHel=2	Topology=i20-39o54-71i
Rv1431	CONSERVED MEMBRANE PROTEIN	No Prediction	No Prediction	No Prediction	Plasma membrane	CytoplasmicMembrane	0.896079	Rv1431 8 0 o41-64i144-163o183-201i222-244o295-316i323-342o348-368i375-393o	ExpAA=179.01	First60=18.35	PredHel=8	Topology=o42-64i145-164o179-201i222-244o295-316i323-345o350-367i374-393o
Rv1434	HYPOTHETICAL PROTEIN	No Prediction	No Prediction	No Prediction	Short sequence	Extracellular	0.754419	Rv1434 0 0 i	ExpAA=0.00	First60=0.00	PredHel=0	Topology=i
Rv1440	PROBABLE PROTEIN-EXPORT MEMBRANE PROTEIN (TRANSLOCASE SUBUNIT) SECG	Not cytoplasm	Not extracellular	plasma membrane	Plasma membrane	CytoplasmicMembrane	0.907253	Rv1440 2 0 o43-62i95-114o	ExpAA=45.59	First60=18.81	PredHel=2	Topology=i43-65o95-114i
Rv1441c	PE-PGRS FAMILY PROTEIN	Not cytoplasm	Not extracellular	plasma membrane	Extracell	Extracellular	0.845612	Rv1441c 0 Y n4-14c32/33o	ExpAA=0.94	First60=0.90	PredHel=0	Topology=o	*	*
Rv1450c	PE-PGRS FAMILY PROTEIN	Not cytoplasm	Not extracellular	Not plasma membrane	Extracell	Extracellular	0.893109	Rv1450c 0 0 i	ExpAA=1.27	First60=0.11	PredHel=0	Topology=o	*
Rv1451	PROBABLE CYTOCHROME C OXIDASE ASSEMBLY FACTOR CTAB	Not cytoplasm	Not extracellular	plasma membrane	Plasma membrane	CytoplasmicMembrane	0.969574	Rv1451 8 0 i20-44o50-77i98-118o124-144i165-189o226-243i250-268o288-307i	ExpAA=184.52	First60=28.31	PredHel=8	Topology=i20-42o55-77i97-119o123-145i152-171o175-197i227-249o288-307i
Rv1452c	PE-PGRS FAMILY PROTEIN	Not cytoplasm	Not extracellular	Not plasma membrane	Extracell	Extracellular	0.816834	Rv1452c 0 0 i	ExpAA=0.36	First60=0.07	PredHel=0	Topology=o
Rv1456c	PROBABLE UNIDENTIFIED ANTIBIOTIC-TRANSPORT INTEGRAL MEMBRANE ABC TRANSPORTER	Not cytoplasm	Not extracellular	plasma membrane	Plasma membrane	CytoplasmicMembrane	0.96256	Rv1456c 8 0 i16-39o72-92i101-121o127-151i172-197o217-241i248-270o276-297i	ExpAA=174.26	First60=22.62	PredHel=8	Topology=i13-35o72-94i101-123o128-150i171-193o217-239i246-265o275-297i
Rv1457c	PROBABLE UNIDENTIFIED ANTIBIOTIC-TRANSPORT INTEGRAL MEMBRANE ABC TRANSPORTER	Not cytoplasm	Not extracellular	plasma membrane	Plasma membrane	CytoplasmicMembrane	0.954657	Rv1457c 6 0 i45-63o75-98i124-146o152-175i182-202o237-258i	ExpAA=134.20	First60=16.36	PredHel=6	Topology=i45-67o72-94i115-137o152-174i181-203o237-259i
Rv1459c	POSSIBLE CONSERVED INTEGRAL MEMBRANE PROTEIN	Not cytoplasm	Not extracellular	plasma membrane	Plasma membrane	CytoplasmicMembrane	0.942945	Rv1459c 14 0 i39-57o77-97i118-133o201-223i235-253o259-276i322-337o343-360i367-388o408-429i441-459o471-492i504	ExpAA=259.48	First60=21.09	PredHel=10	Topology=i40-62o77-99i201-223o233-255i366-388o408-429i436-458o468-490i503-522o527-549i
Rv1469	PROBABLE CATION TRANSPORTER P-TYPE ATPASE D CTPD	Not cytoplasm	Not extracellular	plasma membrane	Plasma membrane	CytoplasmicMembrane	0.719848	Rv1469 7 0 o30-53i65-84o96-123i266-286o292-316i596-614o620-640i	ExpAA=171.58	First60=22.34	PredHel=6	Topology=o30-52i65-84o99-121i266-288o298-320i596-618o
Rv1471	PROBABLE THIOREDOXIN TRXB1	cytoplasm	Not extracellular	Not plasma membrane	Cytoplasm	Cytoplasmic	0.708094	Rv1471 0 0 i	ExpAA=0.02	First60=0.00	PredHel=0	Topology=i
Rv1476	POSSIBLE MEMBRANE PROTEIN	No Prediction	No Prediction	No Prediction	Cytoplasm	Unknown	0.871114	Rv1476 1 0 o138-158i	ExpAA=21.82	First60=0.04	PredHel=1	Topology=o138-160i
Rv1481	PROBABLE MEMBRANE PROTEIN	Not cytoplasm	Not extracellular	plasma membrane	Plasma membrane	Unknown	0.626256	Rv1481 3 0 o15-36i67-85o310-329i	ExpAA=94.28	First60=22.00	PredHel=3	Topology=o15-37i67-86o307-329i
Rv1487	CONSERVED MEMBRANE PROTEIN	Not cytoplasm	Not extracellular	plasma membrane	Plasma membrane	Unknown	0.755603	Rv1487 1 Y n3-14c19/20o43-65i	ExpAA=45.66	First60=40.49	PredHel=2	Topology=i5-27o42-64i	*
Rv1489c	hypothetical protein	Not cytoplasm	Not extracellular	Not plasma membrane	Extracell	Unknown	0.664525	Rv1489c 0 0 i	ExpAA=0.00	First60=0.00	PredHel=0	Topology=o
Rv1490	PROBABLE MEMBRANE PROTEIN	Not cytoplasm	Not extracellular	plasma membrane	Plasma membrane	CytoplasmicMembrane	0.937687	Rv1490 11 0 i37-56o96-121i133-151o157-173i180-196o202-219i226-245o312-333i354-375o381-398i410-429o	ExpAA=202.42	First60=21.02	PredHel=9	Topology=i37-59o101-123i135-152o192-214i226-245o312-334i354-376o381-398i411-433o
Rv1491c	CONSERVED MEMBRANE PROTEIN	Not cytoplasm	Not extracellular	plasma membrane	Plasma membrane	CytoplasmicMembrane	0.958334	Rv1491c 6 0 i32-52o64-84i96-121o149-170i177-197o209-229i	ExpAA=133.39	First60=22.40	PredHel=6	Topology=i32-54o64-81i94-116o148-170i177-199o209-229i
Rv1500	PROBABLE GLYCOSYLTRANSFERASE	Not cytoplasm	Not extracellular	plasma membrane	Cytoplasm	CytoplasmicMembrane	0.765754	Rv1500 2 0 i224-247o259-284i	ExpAA=46.38	First60=0.00	PredHel=2	Topology=i225-247o262-284i
Rv1508c	ble membrane protein	No Prediction	No Prediction	No Prediction	Plasma membrane	CytoplasmicMembrane	0.943222	Rv1508c 10 0 i110-129o217-236i243-261o267-284i291-315o321-340i404-423o443-462i483-505o525-549i	ExpAA=207.79	First60=0.11	PredHel=10	Topology=i112-134o212-234i247-264o268-285i292-314o319-341i404-423o428-450i484-506o526-548i
Rv1510	conserved probable membrane protein	Not cytoplasm	Not extracellular	plasma membrane	Plasma membrane	CytoplasmicMembrane	0.95714	Rv1510 12 0 i38-57o63-86i112-131o143-164i185-204o210-229i241-262o274-293i313-333o353-375i382-402o408-428i	ExpAA=239.41	First60=22.06	PredHel=10	Topology=i33-55o65-87i108-127o142-164i185-207o240-262i316-338o353-375i382-404o408-427i
Rv1517	CONSERVED HYPOTHETICAL TRANSMEMBRANE PROTEIN	Not cytoplasm	Not extracellular	plasma membrane	Plasma membrane	CytoplasmicMembrane	0.945957	Rv1517 6 0 o6-26i33-58o78-99i152-179o191-212i233-251o	ExpAA=131.24	First60=43.41	PredHel=6	Topology=o4-26i33-55o78-100i153-175o190-212i233-252o
Rv1521	PROBABLE FATTY-ACID-CoA LIGASE FADD25 (FATTY-ACID-CoA SYNTHETASE) (FATTY-ACID-CoA SYNTHASE)	Not cytoplasm	Not extracellular	plasma membrane	Cytoplasm	Cytoplasmic	0.599468	Rv1521 1 0 o229-252i	ExpAA=37.82	First60=0.00	PredHel=1	Topology=o230-252i
Rv1522c	PROBABLE CONSERVED TRANSMEMBRANE TRANSPORT PROTEIN MMPL12	Not cytoplasm	Not extracellular	plasma membrane	Plasma membrane	CytoplasmicMembrane	0.792812	Rv1522c 11 0 o20-42i199-216o254-274i295-318o330-353i382-404o824-843i850-875o881-901i922-948o954-973i	ExpAA=268.42	First60=22.92	PredHel=11	Topology=o20-42i214-236o251-273i294-316o331-353i381-403o826-848i853-875o881-903i916-938o942-964i	*
Rv1539	PROBABLE LIPOPROTEIN SIGNAL PEPTIDASE LSPA	Not cytoplasm	Not extracellular	plasma membrane	Cytoplasm	CytoplasmicMembrane	0.955091	Rv1539 4 0 i35-58o88-108i115-132o152-178i	ExpAA=84.32	First60=19.58	PredHel=4	Topology=i36-58o86-108i115-132o158-180i
Rv1548c	PPE FAMILY PROTEIN	Not cytoplasm	Not extracellular	plasma membrane	Extracell	Extracellular	0.903741	Rv1548c 0 0 i	ExpAA=6.53	First60=5.68	PredHel=0	Topology=o	*
Rv1554	PROBABLE FUMARATE REDUCTASE [MEMBRANE ANCHOR SUBUNIT] FRDC (FUMARATE DEHYDROGENASE) (FUMARIC HYDROGENASE)	Not cytoplasm	Not extracellular	plasma membrane	Plasma membrane	CytoplasmicMembrane	0.957005	Rv1554 3 0 i22-43o63-84i104-125o	ExpAA=65.55	First60=22.50	PredHel=3	Topology=i21-43o63-85i106-125o
Rv1555	PROBABLE FUMARATE REDUCTASE [MEMBRANE ANCHOR SUBUNIT] FRDD (FUMARATE DEHYDROGENASE) (FUMARIC HYDROGENASE)	Not cytoplasm	Not extracellular	plasma membrane	Plasma membrane	CytoplasmicMembrane	0.964019	Rv1555 3 0 i18-45o65-83i103-123o	ExpAA=69.73	First60=26.37	PredHel=3	Topology=i17-39o59-81i102-124o	*
Rv1557	PROBABLE CONSERVED TRANSMEMBRANE TRANSPORT PROTEIN MMPL6	Not cytoplasm	Not extracellular	plasma membrane	Plasma membrane	CytoplasmicMembrane	0.789473	Rv1557 5 0 o192-210i217-239o245-268i289-313o325-354i	ExpAA=114.52	First60=0.00	PredHel=5	Topology=o188-210i217-239o249-271i292-314o334-356i
Rv1558	CONSERVED HYPOTHETICAL PROTEIN	No Prediction	No Prediction	No Prediction	Cytoplasm	Unknown	0.89538	Rv1558 0 0 i	ExpAA=0.01	First60=0.00	PredHel=0	Topology=o
Rv1565c	CONSERVED HYPOTHETICAL MEMBRANE PROTEIN	Not cytoplasm	Not extracellular	plasma membrane	Plasma membrane	CytoplasmicMembrane	0.89501	Rv1565c 11 0 i36-53o59-79i99-117o171-190i202-223o229-249i256-277o283-301i321-339o359-377i412-432o	ExpAA=212.78	First60=14.96	PredHel=10	Topology=o51-73i99-121o171-190i202-224o234-251i258-280o285-304i317-339o359-376i410-432o
Rv1566c	Possible inv protein	Not cytoplasm	extracellular	Not plasma membrane	Extracell	Extracellular	0.931531	Rv1566c 0 Y n7-18c30/31o	ExpAA=22.71	First60=21.43	PredHel=1	Topology=i7-29o	*	*
Rv1567c	Probable hypothetical membrane protein	Not cytoplasm	Not extracellular	plasma membrane	Plasma membrane	Unknown	0.966989	Rv1567c 2 0 o34-59i66-86o	ExpAA=45.29	First60=22.56	PredHel=2	Topology=i34-56o66-88i
Rv1572c	CONSERVED HYPOTHETICAL PROTEIN	Not cytoplasm	Not extracellular	Not plasma membrane	Short sequence	Extracellular	0.963131	Rv1572c 0 0 i	ExpAA=0.00	First60=0.00	PredHel=0	Topology=i
Rv1575	Probable phiRV1 phage protein	cytoplasm	Not extracellular	Not plasma membrane	Extracell	Unknown	0.882858	Rv1575 0 0 i	ExpAA=0.00	First60=0.00	PredHel=0	Topology=o
Rv1587c	Partial REP13E12 repeat protein	Not cytoplasm	Not extracellular	Not plasma membrane	Extracell	Unknown	0.770904	Rv1587c 0 0 i	ExpAA=0.00	First60=0.00	PredHel=0	Topology=o
Rv1591	PROBABLE TRANSMEMBRANE PROTEIN	Not cytoplasm	Not extracellular	plasma membrane	Plasma membrane	CytoplasmicMembrane	0.953545	Rv1591 4 0 i24-46o74-96i108-130o167-187i	ExpAA=90.20	First60=22.90	PredHel=4	Topology=i25-47o74-96i108-130o167-189i
Rv1607	Probable ionic transporter integral membrane protein chaA	Not cytoplasm	Not extracellular	plasma membrane	Plasma membrane	CytoplasmicMembrane	0.972338	Rv1607 11 0 i7-24o30-49i61-85o97-118i130-150o162-180i212-231o251-271i283-306o312-334i341-359o	ExpAA=225.70	First60=40.24	PredHel=11	Topology=i5-22o26-48i61-83o96-118i130-152o162-181i212-231o241-263i283-305o315-334i341-359o	*
Rv1610	POSSIBLE CONSERVED MEMBRANE PROTEIN	Not cytoplasm	Not extracellular	plasma membrane	Plasma membrane	CytoplasmicMembrane	0.93453	Rv1610 4 0 i20-40o60-83i90-112o137-163i	ExpAA=90.19	First60=22.79	PredHel=4	Topology=i19-41o61-83i90-112o141-163i
Rv1614	Possible prolipoprotein diacylglyceryl transferases Lgt	Not cytoplasm	Not extracellular	plasma membrane	Cytoplasm	CytoplasmicMembrane	0.894927	Rv1614 7 0 o23-41i53-76o96-116i123-143o197-214i226-244o250-274i	ExpAA=148.20	First60=26.31	PredHel=6	Topology=o15-37i58-75o95-117i197-214o218-240i253-275o
Rv1615	Probable hypothetical membrane protein	Not cytoplasm	extracellular	Not plasma membrane	Extracell	Unknown	0.962987	Rv1615 2 0 i77-97o103-130i	ExpAA=44.44	First60=0.00	PredHel=2	Topology=i76-98o108-130i
Rv1616	CONSERVED MEMBRANE PROTEIN	Not cytoplasm	Not extracellular	plasma membrane	Plasma membrane	CytoplasmicMembrane	0.944779	Rv1616 3 0 i12-29o68-91i98-118o	ExpAA=61.75	First60=18.83	PredHel=3	Topology=i12-29o69-91i98-117o
Rv1619	CONSERVED MEMBRANE PROTEIN	Not cytoplasm	Not extracellular	plasma membrane	Cytoplasm	CytoplasmicMembrane	0.610652	Rv1619 5 0 o49-67i79-98o110-134i428-446o458-478i	ExpAA=86.66	First60=13.98	PredHel=4	Topology=i45-67o77-99i112-134o457-479i
Rv1621c	PROBABLE 'COMPONENT LINKED WITH THE ASSEMBLY OF CYTOCHROME' TRANSPORT TRANSMEMBRANE ATP-BINDING PROTEIN ABC TRANSPORTER CYDD	Not cytoplasm	Not extracellular	plasma membrane	Plasma membrane	CytoplasmicMembrane	0.607016	Rv1621c 7 0 o6-27i39-59o116-137i144-162o168-188i221-242o248-265i	ExpAA=119.87	First60=40.85	PredHel=6	Topology=o4-26i39-61o115-137i142-164o221-243i248-270o	*
Rv1622c	Probable integral membrane cytochrome D ubiquinol oxidase (subunit II) cydB (Cytochrome BD-I oxidase subunit II)	Not cytoplasm	Not extracellular	plasma membrane	Plasma membrane	CytoplasmicMembrane	0.963776	Rv1622c 9 0 o6-24i63-81o87-107i119-142o162-188i200-221o227-247i254-275o303-326i	ExpAA=181.39	First60=23.00	PredHel=8	Topology=i7-29o78-100i121-143o165-187i200-222o227-246i253-275o303-325i
Rv1623c	Probable integral membrane cytochrome D ubiquinol oxidase (subunit I) cydA (Cytochrome BD-I oxidase subunit I)	Not cytoplasm	Not extracellular	plasma membrane	Plasma membrane	CytoplasmicMembrane	0.953174	Rv1623c 9 0 o20-41i53-71o91-115i127-150o187-208i220-242o339-361i373-394o429-451i	ExpAA=200.54	First60=29.86	PredHel=9	Topology=o19-41i53-75o95-117i124-146o185-207i220-242o338-360i372-394o429-451i
Rv1624c	Probable conserved membrane protein	Not cytoplasm	Not extracellular	plasma membrane	Plasma membrane	CytoplasmicMembrane	0.970753	Rv1624c 6 0 i23-43o49-70i82-99o105-126i138-156o162-187i	ExpAA=128.48	First60=31.62	PredHel=6	Topology=o20-42i49-71o77-99i106-128o138-157i164-186o
Rv1625c	MEMBRANE-ANCHORED ADENYLYL CYCLASE CYA (ATP PYROPHOSPHATE-LYASE) (ADENYLATE CYCLASE)	Not cytoplasm	Not extracellular	plasma membrane	Plasma membrane	CytoplasmicMembrane	0.912561	Rv1625c 6 0 i21-43o49-68i75-93o99-116i123-142o154-177i	ExpAA=128.49	First60=35.83	PredHel=6	Topology=i21-43o47-69i71-93o99-118i123-142o155-177i	*
Rv1628c	CONSERVED HYPOTHETICAL PROTEIN	cytoplasm	Not extracellular	Not plasma membrane	Cytoplasm	Unknown	0.564953	Rv1628c 0 0 i	ExpAA=0.00	First60=0.00	PredHel=0	Topology=o
Rv1634	Possible drug efflux membrane protein	Not cytoplasm	Not extracellular	plasma membrane	Plasma membrane	CytoplasmicMembrane	0.974888	Rv1634 14 0 o20-43i55-74o86-104i111-132o144-167i174-194o214-233i240-257o277-296i303-325o337-359i366-387o407-	ExpAA=301.83	First60=27.31	PredHel=14	Topology=o20-42i55-77o81-103i110-132o147-169i176-198o213-234i241-263o278-300i305-327o337-359i366-388o408-430i443-462o
Rv1635c	Probable conserved transmembrane protein	Not cytoplasm	Not extracellular	plasma membrane	Plasma membrane	CytoplasmicMembrane	0.952027	Rv1635c 10 0 i59-77o131-152i159-179o185-203i210-231o251-272i303-322o334-352i364-383o389-407i	ExpAA=220.06	First60=0.84	PredHel=10	Topology=i104-126o131-153i160-179o183-202i209-231o251-273i302-324o334-356i363-384o388-407i
Rv1639c	CONSERVED HYPOTHETICAL MEMBRANE PROTEIN	Not cytoplasm	extracellular	Not plasma membrane	Plasma membrane	CytoplasmicMembrane	0.882034	Rv1639c 4 0 o27-46i58-77o89-109i121-141o	ExpAA=83.92	First60=24.69	PredHel=4	Topology=o29-51i58-75o90-112i119-141o
Rv1640c	Possible lysyl-tRNA synthetase 2 lysX	Not cytoplasm	Not extracellular	plasma membrane	Cytoplasm	Cytoplasmic	0.616396	Rv1640c 6 0 i77-98o118-139i146-168o180-197i209-231o268-291i	ExpAA=143.70	First60=0.10	PredHel=7	Topology=i82-104o119-141i146-168o183-202i209-231o268-290i612-631o
Rv1648	Probable transmembrane protein	Not cytoplasm	Not extracellular	plasma membrane	Plasma membrane	CytoplasmicMembrane	0.962862	Rv1648 7 Y n19-30c38/39o71-89i96-121o133-150i157-175o181-198i205-224o230-247i	ExpAA=149.53	First60=21.62	PredHel=7	Topology=i12-34o63-85i98-117o132-151i158-180o200-219i224-246o	*
Rv1651c	PE-PGRS FAMILY PROTEIN	Not cytoplasm	Not extracellular	Not plasma membrane	Extracell	Extracellular	0.653533	Rv1651c 0 0 i	ExpAA=2.85	First60=0.00	PredHel=0	Topology=o	*
Rv1671	PROBABLE MEMBRANE PROTEIN	Not cytoplasm	Not extracellular	plasma membrane	Plasma membrane	CytoplasmicMembrane	0.956578	Rv1671 3 0 i24-57o69-87i107-127o	ExpAA=69.61	First60=27.49	PredHel=3	Topology=i31-53o68-87i107-129o
Rv1672c	PROBABLE CONSERVED INTEGRAL MEMBRANE TRANSPORT PROTEIN	Not cytoplasm	Not extracellular	plasma membrane	Plasma membrane	CytoplasmicMembrane	0.971347	Rv1672c 12 0 i20-45o51-70i82-105o111-136i148-172o178-196i240-261o273-295i307-326o332-353i365-385o397-418i	ExpAA=261.56	First60=29.11	PredHel=12	Topology=i21-43o53-70i90-112o116-138i145-167o177-196i240-262o272-294i307-326o331-353i365-387o397-419i
Rv1678	PROBABLE INTEGRAL MEMBRANE PROTEIN	Not cytoplasm	Not extracellular	plasma membrane	Plasma membrane	CytoplasmicMembrane	0.966389	Rv1678 8 0 i21-39o81-104i111-128o134-158i179-198o218-237i244-261o267-289i	ExpAA=170.51	First60=22.42	PredHel=8	Topology=i21-43o75-94i99-121o136-158i179-198o218-237i244-263o267-289i
Rv1686c	PROBABLE CONSERVED INTEGRAL MEMBRANE PROTEIN ABC TRANSPORTER	Not cytoplasm	Not extracellular	plasma membrane	Plasma membrane	CytoplasmicMembrane	0.96439	Rv1686c 5 Y n2-12c17/18o33-53i74-101o113-133i145-165o203-221i	ExpAA=129.30	First60=39.56	PredHel=6	Topology=i2-20o30-52i81-103o113-135i142-164o198-220i
Rv1690	PROBABLE LIPOPROTEIN LPRJ	Not cytoplasm	Not extracellular	plasma membrane	Extracell	CytoplasmicMembrane	0.909807	Rv1690 1 Y n18-29c36/37o100-121i	ExpAA=45.74	First60=21.43	PredHel=2	Topology=i21-40o100-122i	*	*
Rv1704c	PROBABLE D-SERINE/ALANINE/GLYCINE TRANSPORTER PROTEIN CYCA	Not cytoplasm	Not extracellular	plasma membrane	Plasma membrane	CytoplasmicMembrane	0.962315	Rv1704c 12 0 i26-43o49-69i103-127o133-152i164-187o207-229i250-269o281-306i343-361o367-395i407-431o437-457i	ExpAA=264.60	First60=32.05	PredHel=12	Topology=i21-43o47-69i98-120o130-152i159-181o207-229i249-271o281-303i340-362o372-394i407-429o439-458i
Rv1707	PROBABLE CONSERVED TRANSMEMBRANE PROTEIN	Not cytoplasm	Not extracellular	plasma membrane	Plasma membrane	CytoplasmicMembrane	0.956102	Rv1707 11 Y n9-20c25/26o35-54i61-77o83-101i113-131o137-155i162-179o216-240i260-282o294-312i317-337o349-377i	ExpAA=234.40	First60=42.89	PredHel=11	Topology=o10-32i39-61o76-98i105-127o137-155i162-179o214-236i256-278o293-312i314-336o356-378i	*
Rv1733c	PROBABLE CONSERVED TRANSMEMBRANE PROTEIN	No Prediction	No Prediction	No Prediction	Plasma membrane	Unknown	0.75703	Rv1733c 2 0 i41-63o164-185i	ExpAA=45.20	First60=17.42	PredHel=2	Topology=i44-66o164-186i	*
Rv1735c	HYPOTHETICAL MEMBRANE PROTEIN	Not cytoplasm	Not extracellular	plasma membrane	Plasma membrane	CytoplasmicMembrane	0.942134	Rv1735c 3 Y n2-12c17/18o27-51i63-84o104-123i	ExpAA=70.40	First60=27.07	PredHel=3	Topology=o32-54i67-89o104-126i
Rv1736c	PROBABLE NITRATE REDUCTASE NARX	Not cytoplasm	Not extracellular	plasma membrane	Cytoplasm	CytoplasmicMembrane	0.659343	Rv1736c 5 0 o420-439i460-485o505-524i544-565o597-615i	ExpAA=112.54	First60=0.00	PredHel=5	Topology=o420-439i460-482o502-524i544-566o599-621i
Rv1737c	POSSIBLE NITRATE/NITRITE TRANSPORTER NARK2	Not cytoplasm	Not extracellular	plasma membrane	Plasma membrane	CytoplasmicMembrane	0.97694	Rv1737c 12 0 i5-23o43-60i72-91o97-120i132-151o157-182i203-224o244-262i274-291o297-321i328-347o367-385i	ExpAA=258.15	First60=40.30	PredHel=12	Topology=i7-26o41-60i72-94o98-120i133-155o160-182i212-234o244-266i273-290o300-322i329-348o363-385i
Rv1739c	PROBABLE SULPHATE-TRANSPORT TRANSMEMBRANE PROTEIN ABC TRANSPORTER	Not cytoplasm	Not extracellular	plasma membrane	Plasma membrane	CytoplasmicMembrane	0.920732	Rv1739c 10 0 i29-49o55-72i79-98o104-127i139-162o182-200i212-234o254-274i333-366o386-414i	ExpAA=234.93	First60=28.19	PredHel=11	Topology=i29-51o55-72i79-98o108-130i137-159o182-204i211-233o258-280i323-345o350-367i388-410o
Rv1743	PROBABLE TRANSMEMBRANE SERINE/THREONINE-PROTEIN KINASE E PKNE (PROTEIN KINASE E) (STPK E)	Not cytoplasm	Not extracellular	plasma membrane	Extracell	CytoplasmicMembrane	0.551072	Rv1743 1 0 o337-359i	ExpAA=22.34	First60=0.00	PredHel=1	Topology=o337-359i
Rv1744c	PROBABLE MEMBRANE PROTEIN	Not cytoplasm	Not extracellular	Not plasma membrane	Extracell	CytoplasmicMembrane	0.829343	Rv1744c 0 0 i	ExpAA=46.94	First60=34.81	PredHel=2	Topology=i12-34o49-71i	*	*
Rv1747	PROBABLE CONSERVED TRANSMEMBRANE ATP-BINDING PROTEIN ABC TRANSPORTER	Not cytoplasm	Not extracellular	plasma membrane	Cytoplasm	CytoplasmicMembrane	0.849049	Rv1747 6 0 i614-633o653-672i693-719o739-760i767-788o837-856i	ExpAA=144.30	First60=0.00	PredHel=6	Topology=i613-635o655-677i697-719o739-761i768-790o837-856i
Rv1748	HYPOTHETICAL PROTEIN	cytoplasm	Not extracellular	Not plasma membrane	Cytoplasm	Cytoplasmic	0.721928	Rv1748 1 0 o20-45i	ExpAA=22.94	First60=22.94	PredHel=1	Topology=o23-45i
Rv1749c	POSSIBLE INTEGRAL MEMBRANE PROTEIN	No Prediction	No Prediction	No Prediction	Cytoplasm	CytoplasmicMembrane	0.959506	Rv1749c 5 0 o20-39i51-74o94-111i118-141o153-172i	ExpAA=89.52	First60=28.59	PredHel=4	Topology=o20-38i51-73o117-139i151-173o
Rv1753c	PPE FAMILY PROTEIN	Not cytoplasm	Not extracellular	plasma membrane	Extracell	CytoplasmicMembrane	0.696874	Rv1753c 0 0 i	ExpAA=9.03	First60=0.63	PredHel=0	Topology=o	*
Rv1754c	CONSERVED HYPOTHETICAL PROTEIN	cytoplasm	Not extracellular	Not plasma membrane	Extracell	Unknown	0.940066	Rv1754c 1 0 i67-86o	ExpAA=20.71	First60=0.00	PredHel=1	Topology=i67-89o
Rv1755c	PROBABLE PHOSPHOLIPASE C 4 (FRAGMENT) PLCD	Not cytoplasm	Not extracellular	plasma membrane	Extracell	Extracellular	0.644693	Rv1755c 0 0 i	ExpAA=1.95	First60=0.63	PredHel=0	Topology=o
Rv1759c	PE-PGRS FAMILY PROTEIN	Not cytoplasm	Not extracellular	Not plasma membrane	Extracell	Extracellular	0.772198	Rv1759c 0 0 i	ExpAA=93.03	First60=0.63	PredHel=0	Topology=o	*
Rv1761c	HYPOTHETICAL EXPORTED PROTEIN	No Prediction	No Prediction	No Prediction	Cytoplasm	CytoplasmicMembrane	0.713217	Rv1761c 1 0 o12-37i	ExpAA=23.94	First60=22.75	PredHel=1	Topology=o15-37i	*	*
Rv1768	PE-PGRS FAMILY PROTEIN	Not cytoplasm	Not extracellular	Not plasma membrane	Extracell	Extracellular	0.745297	Rv1768 0 Y n4-15c33/34o	ExpAA=8.92	First60=0.24	PredHel=0	Topology=o	*
Rv1779c	HYPOTHETICAL INTEGRAL MEMBRANE PROTEIN	cytoplasm	Not extracellular	Not plasma membrane	Cytoplasm	Cytoplasmic	0.772126	Rv1779c 4 0 o41-62i74-91o111-132i286-305o	ExpAA=87.18	First60=20.62	PredHel=4	Topology=i41-63o68-90i110-132o283-305i
Rv1782	PROBABLE CONSERVED MEMBRANE PROTEIN	Not cytoplasm	extracellular	Not plasma membrane	Cytoplasm	Unknown	0.528552	Rv1782 1 0 i53-76o	ExpAA=22.65	First60=7.20	PredHel=1	Topology=i54-76o
Rv1786	PROBABLE FERREDOXIN	cytoplasm	Not extracellular	Not plasma membrane	Cytoplasm	Cytoplasmic	0.701845	Rv1786 0 0 i	ExpAA=0.00	First60=0.00	PredHel=0	Topology=i
Rv1795	CONSERVED HYPOTHETICAL MEMBRANE PROTEIN	Not cytoplasm	Not extracellular	plasma membrane	Plasma membrane	CytoplasmicMembrane	0.94319	Rv1795 11 0 i137-161o167-188i200-219o225-244i251-270o276-296i359-378o384-402i414-433o439-459i480-500o	ExpAA=227.10	First60=9.30	PredHel=10	Topology=i136-158o168-190i203-220o224-246i251-270o274-296i357-379o411-433i440-462o477-499i
Rv1796	PROBABLE PROLINE RICH MEMBRANE-ANCHORED MYCOSIN MYCP5 (SERINE PROTEASE) (SUBTILISIN-LIKE PROTEASE) (SUBTILASE-LIKE) (MYCOSIN-5)	Not cytoplasm	extracellular	Not plasma membrane	Extracell	CytoplasmicMembrane	0.805054	Rv1796 1 Y n16-27c39/40o554-578i	ExpAA=40.09	First60=17.04	PredHel=2	Topology=i12-34o551-573i	*	*
Rv1797	CONSERVED MEMBRANE PROTEIN	cytoplasm	Not extracellular	Not plasma membrane	Cytoplasm	Cytoplasmic	0.804741	Rv1797 2 0 i12-31o43-63i	ExpAA=44.47	First60=38.79	PredHel=2	Topology=i7-29o44-66i	*
Rv1799	PROBABLE LIPOPROTEIN LPPT	Not cytoplasm	Not extracellular	plasma membrane	Extracell	Unknown	0.911162	Rv1799 0 Y n14-29c34/35o	ExpAA=22.18	First60=22.17	PredHel=1	Topology=i12-34o	*	*
Rv1803c	PE-PGRS FAMILY PROTEIN	Not cytoplasm	Not extracellular	Not plasma membrane	Extracell	Extracellular	0.881938	Rv1803c 0 0 i	ExpAA=0.11	First60=0.05	PredHel=0	Topology=o
Rv1810	CONSERVED HYPOTHETICAL PROTEIN	Not cytoplasm	Not extracellular	Not plasma membrane	Cytoplasm	Unknown	0.695093	Rv1810 0 Y n16-27c35/36o	ExpAA=23.71	First60=19.10	PredHel=1	Topology=i13-32o	*	*
Rv1811	POSSIBLE Mg2+ TRANSPORT P-TYPE ATPASE C MGTC	Not cytoplasm	Not extracellular	plasma membrane	Plasma membrane	CytoplasmicMembrane	0.934661	Rv1811 4 0 o6-24i36-55o67-85i97-127o	ExpAA=81.49	First60=37.43	PredHel=4	Topology=o4-26i33-55o59-81i102-124o
Rv1814	MEMBRANE-BOUND C-5 STEROL DESATURASE ERG3 (STEROL-C5-DESATURASE)	Not cytoplasm	Not extracellular	plasma membrane	Cytoplasm	CytoplasmicMembrane	0.910368	Rv1814 3 Y n5-18c25/26o49-79i91-108o158-177i	ExpAA=77.55	First60=22.59	PredHel=3	Topology=o4-23i56-78o91-108i
Rv1819c	PROBABLE DRUGS-TRANSPORT TRANSMEMBRANE ATP-BINDING PROTEIN ABC TRANSPORTER	Not cytoplasm	Not extracellular	plasma membrane	Cytoplasm	CytoplasmicMembrane	0.76478	Rv1819c 5 0 o20-44i65-86o121-141i214-235o255-277i	ExpAA=128.89	First60=21.69	PredHel=6	Topology=o22-44i65-87o120-139i214-236o251-273i332-354o
Rv1822	PROBABLECDP-DIACYLGLYCEROL--GLYCEROL-3-PHOSPHATE 3-PHOSPHATIDYLTRANSFERASE PGSA2 (PGP SYNTHASE) (PHOSPHATIDYLGLYCEROPHOSPHATE SYNTHASE) (3-PHOSPHATIDYL-1'-GLYCEROL-3'PHOSPHATE SYNTHASE)	Not cytoplasm	Not extracellular	plasma membrane	Plasma membrane	CytoplasmicMembrane	0.941714	Rv1822 5 0 o20-47i68-90o96-116i128-146o152-181i	ExpAA=92.04	First60=23.87	PredHel=4	Topology=i22-44o81-103i124-146o156-178i
Rv1824	CONSERVED HYPOTHETICAL MEMBRANE PROTEIN	Not cytoplasm	Not extracellular	plasma membrane	Plasma membrane	CytoplasmicMembrane	0.972714	Rv1824 4 0 i12-32o38-55i67-85o91-109i	ExpAA=81.12	First60=41.44	PredHel=4	Topology=i13-32o36-55i67-86o90-109i
Rv1826	PROBABLE GLYCINE CLEAVAGE SYSTEM H PROTEIN GCVH	Not cytoplasm	Not extracellular	Not plasma membrane	Cytoplasm	Unknown	0.820063	Rv1826 0 0 i	ExpAA=0.20	First60=0.19	PredHel=0	Topology=o
Rv1827	CONSERVED HYPOTHETICAL PROTEIN CFP17	cytoplasm	Not extracellular	Not plasma membrane	Cytoplasm	Cytoplasmic	0.657977	Rv1827 0 0 i	ExpAA=0.00	First60=0.00	PredHel=0	Topology=o
Rv1836c	CONSERVED HYPOTHETICAL PROTEIN	Not cytoplasm	Not extracellular	plasma membrane	Extracell	Unknown	0.780464	Rv1836c 1 0 i115-139o	ExpAA=22.72	First60=0.00	PredHel=1	Topology=i114-136o
Rv1840c	PE-PGRS FAMILY PROTEIN	Not cytoplasm	Not extracellular	plasma membrane	Extracell	Extracellular	0.79107	Rv1840c 0 Y n3-14c32/33o	ExpAA=3.13	First60=2.10	PredHel=0	Topology=o	*
Rv1845c	CONSERVED HYPOTHETICAL TRANSMEMBRANE PROTEIN	Not cytoplasm	Not extracellular	plasma membrane	Plasma membrane	CytoplasmicMembrane	0.767389	Rv1845c 4 Y n3-14c21/22o37-57i69-85o91-111i282-307o	ExpAA=89.73	First60=43.01	PredHel=4	Topology=o4-22i35-57o85-107i282-304o	*
Rv1858	PROBABLE MOLBDENUM-TRANSPORT INTEGRAL MEMBRANE PROTEIN ABC TRANSPORTER MODB	Not cytoplasm	Not extracellular	plasma membrane	Plasma membrane	CytoplasmicMembrane	0.951306	Rv1858 6 0 i12-31o51-77i89-110o122-148i175-197o234-255i	ExpAA=132.81	First60=27.79	PredHel=6	Topology=i9-31o58-77i90-112o127-149i175-197o234-256i
Rv1860	ALANINE AND PROLINE RICH SECRETED PROTEIN APA (FIBRONECTIN ATTACHMENT PROTEIN) (Immunogenic protein MPT32) (Antigen MPT-32) (45-kDa glycoprotein) (45/47 kDa antigen)	Not cytoplasm	extracellular	Not plasma membrane	Extracell	Extracellular	0.922215	Rv1860 0 Y n15-33c39/40o	ExpAA=20.87	First60=20.87	PredHel=1	Topology=i13-35o	*	*
Rv1861	PROBABLE CONSERVED TRANSMEMBRANE PROTEIN	Not cytoplasm	Not extracellular	plasma membrane	Plasma membrane	CytoplasmicMembrane	0.971807	Rv1861 3 0 o20-40i47-70o76-98i	ExpAA=63.43	First60=34.27	PredHel=3	Topology=i19-36o46-68i75-97o
Rv1863c	PROBABLE CONSERVED INTEGRAL MEMBRANE PROTEIN	Not cytoplasm	Not extracellular	plasma membrane	Plasma membrane	CytoplasmicMembrane	0.968357	Rv1863c 7 0 i28-46o52-69i90-110o122-139i160-179o199-223i235-254o	ExpAA=150.99	First60=30.01	PredHel=7	Topology=i26-48o52-69i90-112o116-138i159-181o201-223i230-252o
Rv1877	PROBABLE CONSERVED INTEGRAL MEMBRANE PROTEIN	Not cytoplasm	Not extracellular	plasma membrane	Plasma membrane	CytoplasmicMembrane	0.955359	Rv1877 14 0 i28-52o64-82i94-113o119-140i152-170o182-205i212-234o240-263i275-303o323-341i348-365o377-398i419	ExpAA=307.56	First60=22.81	PredHel=14	Topology=i33-55o65-82i94-116o126-145i152-174o184-206i215-237o241-263i276-307o322-341i348-365o375-397i414-436o479-501i
Rv1881c	POSSIBLE CONSERVED LIPOPROTEIN LPPE	Not cytoplasm	Not extracellular	plasma membrane	Cytoplasm	Unknown	0.606053	Rv1881c 0 Y n5-16c25/26o	ExpAA=15.64	First60=15.63	PredHel=1	Topology=i5-27o	*		*
Rv1885c	CONSERVED HYPOTHETICAL PROTEIN	cytoplasm	Not extracellular	Not plasma membrane	Cytoplasm	Cytoplasmic	0.580085	Rv1885c 0 Y n10-21c33/34o	ExpAA=18.90	First60=18.90	PredHel=1	Topology=i7-29o	*
Rv1886c	SECRETED ANTIGEN 85-B FBPB (85B) (ANTIGEN 85 COMPLEX B) (MYCOLYL TRANSFERASE 85B) (FIBRONECTIN-BINDING PROTEIN B) (EXTRACELLULAR ALPHA-ANTIGEN)	Not cytoplasm	extracellular	Not plasma membrane	Extracell	Extracellular	0.908121	Rv1886c 0 Y n20-31c40/41o	ExpAA=22.90	First60=22.08	PredHel=1	Topology=i20-42o	*	*
Rv1888c	POSSIBLE TRANSMEMBRANE PROTEIN	Not cytoplasm	Not extracellular	Not plasma membrane	Plasma membrane	CytoplasmicMembrane	0.929118	Rv1888c 3 0 o31-57i124-143o155-176i	ExpAA=68.78	First60=23.34	PredHel=3	Topology=o35-57i124-146o156-175i
Rv1891	CONSERVED HYPOTHETICAL PROTEIN	Not cytoplasm	Not extracellular	Not plasma membrane	Extracell	Unknown	0.607064	Rv1891 0 Y n5-16c24/25o	ExpAA=2.31	First60=2.29	PredHel=0	Topology=o	*
Rv1892	PROBABLE MEMBRANE PROTEIN	Not cytoplasm	Not extracellular	plasma membrane	Cytoplasm	Unknown	0.955697	Rv1892 2 0 i28-48o54-78i	ExpAA=44.47	First60=28.40	PredHel=2	Topology=i29-51o55-77i
Rv1902c	PROBABLE SIALIC ACID-TRANSPORT INTEGRAL MEMBRANE PROTEIN NANT	Not cytoplasm	Not extracellular	plasma membrane	Plasma membrane	CytoplasmicMembrane	0.965115	Rv1902c 12 0 i12-38o50-71i78-98o104-124i145-163o169-188i217-235o263-282i289-306o312-335i347-367o379-398i	ExpAA=210.68	First60=34.47	PredHel=10	Topology=i12-34o49-71i84-106o145-167i211-233o261-283i290-307o311-333i345-367o377-399i
Rv1903	PROBABLE CONSERVED MEMBRANE PROTEIN	Not cytoplasm	Not extracellular	plasma membrane	Plasma membrane	CytoplasmicMembrane	0.971142	Rv1903 3 Y n8-20c28/29o38-58i65-89o101-124i	ExpAA=86.85	First60=41.51	PredHel=4	Topology=i5-27o37-58i65-87o102-124i	*
Rv1906c	CONSERVED HYPOTHETICAL PROTEIN	Not cytoplasm	Not extracellular	plasma membrane	Cytoplasm	Unknown	0.971705	Rv1906c 0 Y n10-20c32/33o	ExpAA=20.62	First60=20.52	PredHel=1	Topology=o10-32i	*	*
Rv1910c	PROBABLE EXPORTED PROTEIN	cytoplasm	Not extracellular	Not plasma membrane	Extracell	CytoplasmicMembrane	0.88758	Rv1910c 0 Y n8-21c25/26o	ExpAA=21.06	First60=19.70	PredHel=1	Topology=o4-26i	*
Rv1911c	PROBABLE LIPOPROTEIN LPPC	Not cytoplasm	Not extracellular	plasma membrane	Extracell	Unknown	0.653353	Rv1911c 0 Y n10-21c26/27o	ExpAA=3.57	First60=3.52	PredHel=0	Topology=o	*		*
Rv1917c	PPE FAMILY PROTEIN	Not cytoplasm	Not extracellular	plasma membrane	Extracell	Extracellular	0.73201	Rv1917c 0 0 i	ExpAA=11.00	First60=3.05	PredHel=0	Topology=o
Rv1918c	PPE FAMILY PROTEIN	Not cytoplasm	Not extracellular	plasma membrane	Extracell	Extracellular	0.584932	Rv1918c 0 0 i	ExpAA=71.79	First60=24.39	PredHel=0	Topology=o	*
Rv1924c	HYPOTHETICAL PROTEIN	Not cytoplasm	Not extracellular	plasma membrane	Plasma membrane	CytoplasmicMembrane	0.959121	Rv1924c 3 0 i32-53o59-79i100-123o	ExpAA=63.76	First60=24.26	PredHel=3	Topology=i32-54o59-81i101-123o
Rv1926c	IMMUNOGENIC PROTEIN MPT63 (ANTIGEN MPT63/MPB63) (16 kDa IMMUNOPROTECTIVE EXTRACELLULAR PROTEIN)	Not cytoplasm	extracellular	Not plasma membrane	Extracell	Extracellular	0.762515	Rv1926c 0 Y n10-21c29/30o	ExpAA=22.82	First60=22.70	PredHel=1	Topology=i12-34o	*
Rv1949c	CONSERVED HYPOTHETICAL PROTEIN	Not cytoplasm	Not extracellular	plasma membrane	Cytoplasm	Cytoplasmic	0.594209	Rv1949c 0 0 i	ExpAA=0.00	First60=0.00	PredHel=0	Topology=o
Rv1964	CONSERVED HYPOTHETICAL INTEGRAL MEMBRANE PROTEIN YRBE3A	Not cytoplasm	Not extracellular	plasma membrane	Plasma membrane	CytoplasmicMembrane	0.924104	Rv1964 4 0 o62-81i159-181o201-221i241-264o	ExpAA=115.68	First60=4.77	PredHel=5	Topology=i60-82o97-119i159-181o201-220i241-263o
Rv1965	CONSERVED HYPOTHETICAL INTEGRAL MEMBRANE PROTEIN YRBE3B	Not cytoplasm	Not extracellular	plasma membrane	Plasma membrane	CytoplasmicMembrane	0.92611	Rv1965 5 0 i20-37o43-67i152-174o202-225i237-261o	ExpAA=124.30	First60=19.72	PredHel=5	Topology=i51-73o103-125i152-174o204-226i239-261o
Rv1968	MCE-FAMILY PROTEIN MCE3C	cytoplasm	extracellular	Not plasma membrane	Extracell	Unknown	0.515079	Rv1968 0 Y n10-21c26/27o	ExpAA=20.58	First60=20.56	PredHel=1	Topology=i9-31o	*
Rv1972	PROBABLE CONSERVED MCE ASSOCIATED MEMBRANE PROTEIN	Not cytoplasm	extracellular	Not plasma membrane	Plasma membrane	Unknown	0.553774	Rv1972 1 0 o38-58i	ExpAA=22.51	First60=22.49	PredHel=1	Topology=o38-60i
Rv1974	PROBABLE CONSERVED MEMBRANE PROTEIN	Not cytoplasm	Not extracellular	plasma membrane	Plasma membrane	Unknown	0.78416	Rv1974 0 Y n12-23c28/29o	ExpAA=21.46	First60=21.04	PredHel=1	Topology=i12-34o	*	*
Rv1975	CONSERVED HYPOTHETICAL PROTEIN	Not cytoplasm	Not extracellular	Not plasma membrane	Extracell	Unknown	0.587404	Rv1975 0 Y n8-19c27/28o	ExpAA=7.36	First60=6.77	PredHel=0	Topology=o	*	*
Rv1979c	POSSIBLE CONSERVED PERMEASE	Not cytoplasm	Not extracellular	plasma membrane	Plasma membrane	CytoplasmicMembrane	0.966317	Rv1979c 12 0 i14-34o46-69i90-114o134-155i167-185o216-235i256-278o298-319i348-367o373-396i416-434o446-467i	ExpAA=263.49	First60=34.73	PredHel=12	Topology=i13-35o50-72i92-114o134-156i168-190o213-235i256-278o298-320i348-367o377-396i417-439o449-471i
Rv1980c	IMMUNOGENIC PROTEIN MPT64 (ANTIGEN MPT64/MPB64)	Not cytoplasm	extracellular	Not plasma membrane	Extracell	Extracellular	0.939275	Rv1980c 0 Y n8-18c23/24o	ExpAA=15.72	First60=15.71	PredHel=1	Topology=i5-24o	*
Rv1983	PE-PGRS FAMILY PROTEIN	Not cytoplasm	Not extracellular	plasma membrane	Extracell	Extracellular	0.594933	Rv1983 0 Y n3-11c16/17o	ExpAA=22.00	First60=0.02	PredHel=0	Topology=o
Rv1986	PROBABLE CONSERVED INTEGRAL MEMBRANE PROTEIN	Not cytoplasm	Not extracellular	plasma membrane	Plasma membrane	CytoplasmicMembrane	0.965181	Rv1986 6 0 o6-27i39-62o68-86i107-124o144-166i178-198o	ExpAA=117.19	First60=44.74	PredHel=5	Topology=o5-27i36-58o68-87i144-166o176-198i	*
Rv1987	POSSIBLE CHITINASE	Not cytoplasm	Not extracellular	plasma membrane	Extracell	Extracellular	0.862792	Rv1987 0 Y n14-32c37/38o	ExpAA=22.63	First60=22.60	PredHel=1	Topology=i13-35o	*
Rv1992c	PROBABLE METAL CATION TRANSPORTER P-TYPE ATPASE G CTPG	Not cytoplasm	Not extracellular	plasma membrane	Plasma membrane	CytoplasmicMembrane	0.580793	Rv1992c 5 0 i158-176o182-201i382-405o411-437i710-737o	ExpAA=117.35	First60=0.04	PredHel=5	Topology=i160-182o204-226i378-400o410-432i710-732o
Rv1997	PROBABLE METAL CATION TRANSPORTER P-TYPE ATPASE A CTPF	Not cytoplasm	Not extracellular	plasma membrane	Plasma membrane	CytoplasmicMembrane	0.872401	Rv1997 10 0 i64-82o88-104i251-269o281-306i710-728o734-752i773-794o806-823i843-862o874-897i	ExpAA=207.62	First60=0.27	PredHel=10	Topology=i64-81o85-104i247-269o284-306i701-723o728-750i773-795o808-825i838-860o875-897i
Rv1999c	PROBABLE CONSERVED INTEGRAL MEMBRANE PROTEIN	Not cytoplasm	Not extracellular	plasma membrane	Plasma membrane	CytoplasmicMembrane	0.955864	Rv1999c 12 0 i20-45o51-72i93-120o126-143i155-175o187-206i227-250o270-301i322-341o347-366i378-394o400-419i	ExpAA=239.16	First60=35.21	PredHel=10	Topology=i24-46o51-73i94-116o121-143i150-172o187-206i227-249o274-296i345-367o382-415i	*	*
Rv2025c	POSSIBLE CONSERVED MEMBRANE PROTEIN	Not cytoplasm	Not extracellular	plasma membrane	Plasma membrane	CytoplasmicMembrane	0.852654	Rv2025c 6 0 i48-72o78-95i116-138o144-167i188-206o212-229i	ExpAA=110.61	First60=13.85	PredHel=4	Topology=i48-70o112-134i146-165o203-225i
Rv2039c	Probable sugar-transport integral membrane protein ABC transporter	Not cytoplasm	Not extracellular	plasma membrane	Plasma membrane	CytoplasmicMembrane	0.954641	Rv2039c 6 0 i12-37o79-100i112-132o144-161i198-221o241-264i	ExpAA=132.36	First60=22.97	PredHel=6	Topology=i13-35o78-100i112-134o144-161i199-221o241-263i
Rv2040c	Probable sugar-transport integral membrane protein ABC transporter	Not cytoplasm	Not extracellular	plasma membrane	Plasma membrane	CytoplasmicMembrane	0.966292	Rv2040c 8 0 i20-39o65-95i107-127o133-151i158-180o213-233i245-263o269-287i	ExpAA=172.36	First60=21.16	PredHel=8	Topology=i20-39o73-95i102-124o134-151i158-180o202-224i231-253o263-285i		*
Rv2044c	CONSERVED HYPOTHETICAL PROTEIN	No Prediction	No Prediction	No Prediction	Plasma membrane	CytoplasmicMembrane	0.893103	Rv2044c 1 Y n3-14c18/19o80-102i	ExpAA=39.45	First60=14.93	PredHel=2	Topology=i2-19o80-102i
Rv2050	CONSERVED HYPOTHETICAL PROTEIN	No Prediction	No Prediction	No Prediction	Cytoplasm	Cytoplasmic	0.70815	Rv2050 0 0 i	ExpAA=0.00	First60=0.00	PredHel=0	Topology=i
Rv2051c	Polyprenol-monophosphomannose synthase Ppm1	Not cytoplasm	Not extracellular	plasma membrane	Cytoplasm	CytoplasmicMembrane	0.692408	Rv2051c 8 0 i21-39o45-63i70-89o95-117i124-144o164-191i203-225o510-527i	ExpAA=155.08	First60=35.75	PredHel=7	Topology=i21-39o43-60i67-89o99-121i128-150o165-187i206-228o
Rv2053c	PROBABLE TRANSMEMBRANE PROTEIN	Not cytoplasm	Not extracellular	plasma membrane	Plasma membrane	Unknown	0.932369	Rv2053c 2 Y n4-15c20/21o30-52i73-98o	ExpAA=64.48	First60=41.32	PredHel=3	Topology=o5-27i29-51o75-97i
Rv2057c	Probable ribosomal protein L33	cytoplasm	Not extracellular	Not plasma membrane	Cytoplasm	Unknown	0.644083	Rv2057c 0 0 i	ExpAA=0.00	First60=0.00	PredHel=0	Topology=i
Rv2060	Possible conserved integral membrane protein	Not cytoplasm	Not extracellular	plasma membrane	Plasma membrane	CytoplasmicMembrane	0.946398	Rv2060 3 Y n4-15c23/24o39-67i79-103o109-129i	ExpAA=91.22	First60=40.64	PredHel=4	Topology=i5-22o42-64i76-98o108-130i	*
Rv2076c	HYPOTHETICAL PROTEIN	Not cytoplasm	Not extracellular	plasma membrane	Plasma membrane	Unknown	0.956575	Rv2076c 2 0 i24-43o49-69i	ExpAA=41.94	First60=33.16	PredHel=2	Topology=i24-46o50-69i
Rv2077c	POSSIBLE CONSERVED TRANSMEMBRANE PROTEIN	Not cytoplasm	Not extracellular	plasma membrane	Plasma membrane	Unknown	0.84115	Rv2077c 0 0 i	ExpAA=37.37	First60=0.00	PredHel=2	Topology=i274-296o300-322i
Rv2080	Possible lipoprotein lppJ	Not cytoplasm	Not extracellular	plasma membrane	Extracell	Unknown	0.764532	Rv2080 0 Y n16-26c30/31o	ExpAA=16.08	First60=16.07	PredHel=1	Topology=i12-34o	*
Rv2082	Rv2082	Not cytoplasm	extracellular	Not plasma membrane	Extracell	Cellwall	0.817598	Rv2082 0 0 i	ExpAA=0.27	First60=0.00	PredHel=0	Topology=o
Rv2083	CONSERVED HYPOTHETICAL PROTEIN	Not cytoplasm	Not extracellular	plasma membrane	Cytoplasm	Unknown	0.598209	Rv2083 0 0 i	ExpAA=1.17	First60=0.29	PredHel=0	Topology=o
Rv2091c	Probable membrane protein	Not cytoplasm	Not extracellular	plasma membrane	Extracell	Unknown	0.972061	Rv2091c 1 0 i136-161o	ExpAA=23.52	First60=0.00	PredHel=1	Topology=i138-160o
Rv2093c	Probable Sec-independent protein translocase transmembrane protein tatC	Not cytoplasm	Not extracellular	plasma membrane	Plasma membrane	CytoplasmicMembrane	0.94347	Rv2093c 6 0 i38-56o108-128i140-163o187-213i225-241o247-267i	ExpAA=128.21	First60=21.23	PredHel=6	Topology=i38-60o108-130i142-164o195-217i224-243o247-269i
Rv2094c	PROBABLE SEC-INDEPENDENT PROTEIN TRANSLOCASE MEMBRANE-BOUND PROTEIN TATA	cytoplasm	Not extracellular	Not plasma membrane	Cytoplasm	Unknown	0.940894	Rv2094c 1 0 o6-22i	ExpAA=18.04	First60=18.04	PredHel=1	Topology=o5-22i
Rv2098c	PE-PGRS FAMILY PROTEIN	Not cytoplasm	Not extracellular	plasma membrane	Extracell	Extracellular	0.861223	Rv2098c 0 0 i	ExpAA=0.03	First60=0.00	PredHel=0	Topology=o
Rv2111c	CONSERVED HYPOTHETICAL PROTEIN	Not cytoplasm	Not extracellular	Not plasma membrane	Cytoplasm	Cytoplasmic	0.840194	Rv2111c 0 0 i	ExpAA=0.00	First60=0.00	PredHel=0	Topology=i
Rv2113	Probable integral membrane protein	Not cytoplasm	Not extracellular	plasma membrane	Plasma membrane	CytoplasmicMembrane	0.942146	Rv2113 8 0 i45-65o80-102i114-133o139-162i174-196o208-226i271-302o331-351i	ExpAA=173.19	First60=16.51	PredHel=8	Topology=i41-63o78-100i105-124o139-161i174-196o206-223i280-302o330-349i
Rv2114	HYPOTHETICAL PROTEIN	No Prediction	No Prediction	No Prediction	Cytoplasm	Unknown	0.717276	Rv2114 0 0 i	ExpAA=0.00	First60=0.00	PredHel=0	Topology=o
Rv2116	Probable conserved lipoprotein lppK	Not cytoplasm	Not extracellular	plasma membrane	Extracell	Unknown	0.553299	Rv2116 0 Y n7-18c23/24o	ExpAA=4.75	First60=4.75	PredHel=0	Topology=o	*	*	*
Rv2120c	PROBABLE CONSERVED INTEGRAL MEMBRANE PROTEIN	Not cytoplasm	extracellular	plasma membrane	Plasma membrane	CytoplasmicMembrane	0.974762	Rv2120c 4 Y n4-19c31/32o47-65i77-99o105-124i136-159o	ExpAA=102.62	First60=41.71	PredHel=5	Topology=i5-27o42-64i77-99o104-123i136-158o	*
Rv2126c	PE-PGRS FAMILY PROTEIN	Not cytoplasm	Not extracellular	plasma membrane	Extracell	Extracellular	0.859531	Rv2126c 0 0 i	ExpAA=1.05	First60=0.06	PredHel=0	Topology=o		*
Rv2127	Probable L-asparagine permease ansP1	Not cytoplasm	Not extracellular	plasma membrane	Plasma membrane	CytoplasmicMembrane	0.969664	Rv2127 12 0 i28-48o54-77i98-124o136-157i169-189o209-230i251-272o300-321i342-363o375-394i415-433o439-459i	ExpAA=259.39	First60=27.83	PredHel=12	Topology=i26-45o55-77i98-120o135-157i162-184o208-230i251-273o293-315i341-363o368-390i411-433o437-459i		*
Rv2128	PROBABLE CONSERVED TRANSMEMBRANE PROTEIN	Not cytoplasm	Not extracellular	plasma membrane	Plasma membrane	Unknown	0.966523	Rv2128 2 0 i20-39o45-63i	ExpAA=41.91	First60=39.01	PredHel=2	Topology=i20-37o41-63i	*
Rv2136c		Not cytoplasm	Not extracellular	plasma membrane	Plasma membrane	CytoplasmicMembrane	0.92681	Rv2136c 5 0 i86-104o116-135i184-203o223-242i254-275o	ExpAA=125.26	First60=15.13	PredHel=5	Topology=i86-104o114-136i187-209o224-246i253-275o
Rv2140c	CONSERVED HYPOTHETICAL PROTEIN TB18.6	cytoplasm	Not extracellular	Not plasma membrane	Extracell	Cytoplasmic	0.727571	Rv2140c 0 0 i	ExpAA=0.13	First60=0.00	PredHel=0	Topology=o
Rv2142c	HYPOTHETICAL PROTEIN	No Prediction	No Prediction	No Prediction	Cytoplasm	Cytoplasmic	0.592548	Rv2142c 0 0 i	ExpAA=0.00	First60=0.00	PredHel=0	Topology=i
Rv2144c	Probable transmembrane protein	Not cytoplasm	Not extracellular	Not plasma membrane	Cytoplasm	Unknown	0.924136	Rv2144c 1 Y n3-14c19/20o29-47i	ExpAA=39.80	First60=39.80	PredHel=2	Topology=i2-21o25-44i	*
Rv2146c	Possible conserved transmembrane protein	Not cytoplasm	Not extracellular	plasma membrane	Plasma membrane	CytoplasmicMembrane	0.887527	Rv2146c 3 0 o6-25i37-55o75-95i	ExpAA=46.80	First60=25.10	PredHel=2	Topology=o4-26i70-92o
Rv2154c	FtsW-like protein FtsW	Not cytoplasm	Not extracellular	plasma membrane	Cytoplasm	CytoplasmicMembrane	0.959704	Rv2154c 10 0 i57-78o90-110i122-142o162-179i191-208o214-231i236-256o312-339i351-375o387-409i	ExpAA=211.14	First60=4.62	PredHel=10	Topology=i56-78o88-110i123-142o152-174i186-208o212-231i236-255o316-338i351-373o383-405i
Rv2156c	Probable phospho-N-acetylmuramoyl-pentappeptidetransferase MurX	Not cytoplasm	Not extracellular	plasma membrane	Plasma membrane	CytoplasmicMembrane	0.972756	Rv2156c 10 0 o6-27i48-68o80-100i120-137o157-177i189-211o231-248i255-274o280-301i322-350o	ExpAA=207.88	First60=31.18	PredHel=10	Topology=o4-26i53-75o79-100i121-140o155-177i189-211o231-248i255-277o281-303i334-356o	*
Rv2162c	PE-PGRS FAMILY PROTEIN	Not cytoplasm	Not extracellular	plasma membrane	Extracell	Extracellular	0.826276	Rv2162c 0 0 i	ExpAA=0.97	First60=0.90	PredHel=0	Topology=o	*
Rv2164c	PROBABLE CONSERVED PROLINE RICH MEMBRANE PROTEIN	Not cytoplasm	extracellular	Not plasma membrane	Extracell	Unknown	0.82596	Rv2164c 1 0 i122-142o	ExpAA=21.43	First60=0.00	PredHel=1	Topology=i122-144o
Rv2169c	PROBABLE CONSERVED TRANSMEMBRANE PROTEIN	Not cytoplasm	Not extracellular	plasma membrane	Cytoplasm	Unknown	0.933126	Rv2169c 2 0 i43-62o68-90i	ExpAA=41.20	First60=16.76	PredHel=2	Topology=i45-62o67-89i
Rv2171	Probable conserved lipoprotein lppM	No Prediction	No Prediction	No Prediction	Extracell	Unknown	0.77289	Rv2171 1 Y n10-21c27/28o189-210i	ExpAA=37.06	First60=14.42	PredHel=1	Topology=i188-210o	*
Rv2174	Possible conserved integral membrane protein	Not cytoplasm	Not extracellular	plasma membrane	Plasma membrane	CytoplasmicMembrane	0.963473	Rv2174 14 0 i40-58o78-100i112-132o171-191i203-221o233-249i256-272o278-303i315-344o356-378i390-408o414-438i450	ExpAA=262.49	First60=16.43	PredHel=12	Topology=i36-58o78-100i112-134o171-193i198-220o235-257i278-300o315-337i344-366o386-408i415-437o476-498i
Rv2176	PROBABLE TRANSMEMBRANE SERINE/THREONINE-PROTEIN KINASE L PKNL (PROTEIN KINASE L) (STPK L)	Not cytoplasm	Not extracellular	plasma membrane	Cytoplasm	CytoplasmicMembrane	0.61773	Rv2176 1 0 i370-391o	ExpAA=40.77	First60=0.02	PredHel=1	Topology=i370-392o
Rv2180c	Probable conserved integral membrane protein	Not cytoplasm	Not extracellular	plasma membrane	Plasma membrane	CytoplasmicMembrane	0.930208	Rv2180c 6 0 i17-37o65-87i94-115o135-157i164-185o191-211i	ExpAA=128.64	First60=22.78	PredHel=5	Topology=o15-37i58-80o134-156i163-185o190-212i
Rv2181	Probable conserved integral membrane protein	Not cytoplasm	Not extracellular	plasma membrane	Plasma membrane	CytoplasmicMembrane	0.955415	Rv2181 11 0 o16-35i62-80o100-121i142-165o191-212i219-238o281-298i305-324o330-346i351-369o389-408i	ExpAA=223.99	First60=22.03	PredHel=10	Topology=i17-39o100-122i143-165o190-212i219-238o281-303i310-327o331-346i351-369o389-408i
Rv2193	PROBABLE CYTOCHROME C OXIDASE (SUBUNIT III) CTAE	Not cytoplasm	Not extracellular	plasma membrane	Plasma membrane	CytoplasmicMembrane	0.972356	Rv2193 5 0 i24-47o67-90i102-119o139-163i183-202o	ExpAA=109.17	First60=22.52	PredHel=5	Topology=i25-47o67-89i102-119o139-161i180-202o
Rv2194	Probable Ubiquinol-cytochrome C reductase QcrC(cytochrome C subunit)	Not cytoplasm	Not extracellular	plasma membrane	Extracell	Unknown	0.704631	Rv2194 1 Y n25-36c54/55o259-278i	ExpAA=41.77	First60=21.76	PredHel=2	Topology=i25-47o259-278i	*	*
Rv2195	Probable Rieske iron-sulfur protein QcrA	Not cytoplasm	Not extracellular	plasma membrane	Cytoplasm	CytoplasmicMembrane	0.807149	Rv2195 3 0 i96-117o137-157i202-227o	ExpAA=67.55	First60=0.00	PredHel=3	Topology=i97-119o134-156i202-224o
Rv2196	Probable Ubiquinol-cytochrome C reductase QcrB (cytochrome B subunit)	Not cytoplasm	Not extracellular	plasma membrane	Plasma membrane	CytoplasmicMembrane	0.947994	Rv2196 9 0 i43-69o113-134i146-166o178-200i212-237o267-286i336-355o375-402i414-434o	ExpAA=193.79	First60=15.11	PredHel=9	Topology=o46-68i115-134o144-166i178-200o215-237i267-289o333-355i375-397o412-434i
Rv2197c	Probable conserved transmembrane protein	Not cytoplasm	Not extracellular	plasma membrane	Plasma membrane	CytoplasmicMembrane	0.941848	Rv2197c 4 0 i23-44o64-85i152-175o181-201i	ExpAA=89.71	First60=22.60	PredHel=4	Topology=i25-47o62-84i152-174o180-202i
Rv2198c	PROBABLE CONSERVED MEMBRANE PROTEIN MMPS3	Not cytoplasm	extracellular	plasma membrane	Extracell	Unknown	0.968713	Rv2198c 1 0 o98-121i	ExpAA=22.66	First60=0.00	PredHel=1	Topology=o98-120i
Rv2199c	Possible conserved integral membrane protein	Not cytoplasm	Not extracellular	plasma membrane	Plasma membrane	CytoplasmicMembrane	0.954956	Rv2199c 4 0 i7-30o36-56i90-110o116-134i	ExpAA=81.50	First60=43.94	PredHel=3	Topology=i7-29o34-56i108-130o	*
Rv2200c	PROBABLE TRANSMEMBRANE CYTOCHROME C OXIDASE (SUBUNIT II) CTAC	Not cytoplasm	Not extracellular	plasma membrane	Cytoplasm	CytoplasmicMembrane	0.786221	Rv2200c 3 0 i31-51o71-95i116-136o	ExpAA=65.58	First60=20.00	PredHel=3	Topology=i31-53o73-95i116-138o	*	*
Rv2203	POSSIBLE CONSERVED MEMBRANE PROTEIN	cytoplasm	Not extracellular	plasma membrane	Extracell	Unknown	0.919375	Rv2203 1 0 i75-97o	ExpAA=22.80	First60=0.01	PredHel=1	Topology=o75-97i
Rv2206	PROBABLE CONSERVED TRANSMEMBRANE PROTEIN	Not cytoplasm	Not extracellular	plasma membrane	Cytoplasm	Unknown	0.93627	Rv2206 2 0 i31-49o55-75i	ExpAA=41.93	First60=26.79	PredHel=2	Topology=i30-49o53-75i
Rv2208	Probable cobalamin 5'-phosphate synthase CobS	Not cytoplasm	Not extracellular	plasma membrane	Plasma membrane	CytoplasmicMembrane	0.912694	Rv2208 5 Y n4-15c21/22o31-52i107-126o132-152i173-192o198-217i	ExpAA=121.00	First60=28.67	PredHel=4	Topology=i33-55o112-143i164-186o196-218i	*	*
Rv2209	Probable conserved integral membrane protein	Not cytoplasm	Not extracellular	plasma membrane	Plasma membrane	CytoplasmicMembrane	0.968172	Rv2209 12 0 i20-43o55-75i84-103o109-132i153-171o183-201i239-259o265-283i295-316o322-347i359-382o388-406i	ExpAA=263.52	First60=32.93	PredHel=12	Topology=i21-43o48-70i83-105o110-132i153-172o187-209i233-255o265-284i291-313o328-350i359-381o386-408i
Rv2219	PROBABLE CONSERVED TRANSMEMBRANE PROTEIN	Not cytoplasm	Not extracellular	plasma membrane	Plasma membrane	Unknown	0.768973	Rv2219 2 0 i46-67o73-93i	ExpAA=44.21	First60=14.82	PredHel=2	Topology=i45-67o71-93i		*
Rv2220	GLUTAMINE SYNTHETASE GLNA1 (GLUTAMINE SYNTHASE) (GS-I)	cytoplasm	Not extracellular	Not plasma membrane	Cytoplasm	Cytoplasmic	0.552937	Rv2220 0 0 i	ExpAA=0.06	First60=0.00	PredHel=0	Topology=o
Rv2232	CONSERVED HYPOTHETICAL PROTEIN	Not cytoplasm	Not extracellular	Not plasma membrane	Extracell	Unknown	0.553663	Rv2232 0 0 i	ExpAA=0.00	First60=0.00	PredHel=0	Topology=o
Rv2235	PROBABLE CONSERVED TRANSMEMBRANE PROTEIN	Not cytoplasm	Not extracellular	plasma membrane	Cytoplasm	CytoplasmicMembrane	0.941477	Rv2235 3 0 o12-33i178-194o214-237i	ExpAA=54.40	First60=22.47	PredHel=3	Topology=o11-33i172-194o214-236i
Rv2253	Possible secreted unknown protein	cytoplasm	Not extracellular	Not plasma membrane	Extracell	Unknown	0.680079	Rv2253 0 Y n10-21c28/29o	ExpAA=1.94	First60=1.92	PredHel=0	Topology=o	*	*
Rv2254c	Probable integral membrane protein	Not cytoplasm	Not extracellular	plasma membrane	Plasma membrane	CytoplasmicMembrane	0.964855	Rv2254c 4 0 o20-41i62-88o94-118i130-150o	ExpAA=87.25	First60=22.31	PredHel=4	Topology=i19-41o61-83i96-118o128-150i
Rv2262c	CONSERVED HYPOTHETICAL PROTEIN	Not cytoplasm	Not extracellular	plasma membrane	Plasma membrane	CytoplasmicMembrane	0.837464	Rv2262c 7 0 i12-28o34-52i59-78o84-104i116-137o157-185i192-212o	ExpAA=132.03	First60=37.28	PredHel=5	Topology=i12-31o35-54i75-97o163-185i192-214o	*	*
Rv2264c	conserved hypothetical proline rich protein	Not cytoplasm	extracellular	Not plasma membrane	Extracell	Cellwall	0.564962	Rv2264c 1 Y n8-18c23/24o425-451i	ExpAA=16.45	First60=0.93	PredHel=0	Topology=o	*
Rv2265	Possible conserved integral membrane protein	Not cytoplasm	Not extracellular	plasma membrane	Plasma membrane	CytoplasmicMembrane	0.959416	Rv2265 10 0 i21-39o51-76i88-121o178-200i232-254o260-280i292-312o318-341i353-376o382-401i	ExpAA=217.98	First60=30.21	PredHel=9	Topology=o20-42i49-71o98-120i178-200o232-254i261-283o298-332i353-375o379-401i
Rv2271	CONSERVED HYPOTHETICAL PROTEIN	cytoplasm	Not extracellular	Not plasma membrane	Cytoplasm	Cytoplasmic	0.587558	Rv2271 0 0 i	ExpAA=0.00	First60=0.00	PredHel=0	Topology=i
Rv2272	PROBABLE CONSERVED TRANSMEMBRANE PROTEIN	Not cytoplasm	Not extracellular	plasma membrane	Plasma membrane	CytoplasmicMembrane	0.968274	Rv2272 3 0 i26-46o58-78i99-120o	ExpAA=63.44	First60=24.00	PredHel=3	Topology=i26-48o58-77i98-120o
Rv2273	PROBABLE CONSERVED TRANSMEMBRANE PROTEIN	Not cytoplasm	Not extracellular	plasma membrane	Plasma membrane	CytoplasmicMembrane	0.972662	Rv2273 3 0 i21-38o50-68i89-108o	ExpAA=58.47	First60=31.17	PredHel=3	Topology=i20-38o48-68i89-108o
Rv2281	Putative phosphate-transport permease PitB	Not cytoplasm	Not extracellular	plasma membrane	Plasma membrane	CytoplasmicMembrane	0.953922	Rv2281 13 0 o38-56i68-86o106-126i147-165o177-200i212-233o325-346i358-377o389-406i413-431o437-457i478-505o525	ExpAA=255.82	First60=19.87	PredHel=12	Topology=i40-58o68-87i108-127o147-164i177-196o211-233i321-343o358-377i384-406o436-458i484-506o526-548i
Rv2283	HYPOTHETICAL PROTEIN	No Prediction	No Prediction	No Prediction	Extracell	Unknown	0.573771	Rv2283 0 0 i	ExpAA=0.00	First60=0.00	PredHel=0	Topology=o
Rv2284	Probable esterase LipM	Not cytoplasm	Not extracellular	Not plasma membrane	Cytoplasm	CytoplasmicMembrane	0.62691	Rv2284 3 0 i12-30o42-66i78-95o	ExpAA=61.22	First60=37.86	PredHel=3	Topology=i7-29o44-66i78-95o	*
Rv2287	Probable conserved integral membrane transport protein YjcE	Not cytoplasm	Not extracellular	plasma membrane	Plasma membrane	CytoplasmicMembrane	0.952252	Rv2287 13 0 o12-31i38-54o60-78i90-112o124-143i164-186o192-212i224-240o246-263i275-294o314-337i358-379o391-411i	ExpAA=248.09	First60=25.72	PredHel=12	Topology=i12-34o60-78i90-112o122-144i165-187o192-211i223-240o245-267i274-296o311-330i358-380o390-412i
Rv2290	Probable conserved lipoprotein lppO	Not cytoplasm	Not extracellular	plasma membrane	Extracell	Unknown	0.852716	Rv2290 0 Y n11-26c31/32o	ExpAA=5.19	First60=5.17	PredHel=0	Topology=o	*	*
Rv2316	PROBABLE SUGAR-TRANSPORT INTEGRAL MEMBRANE PROTEIN ABC TRANSPORTER USPA	Not cytoplasm	Not extracellular	plasma membrane	Plasma membrane	CytoplasmicMembrane	0.939632	Rv2316 6 0 i12-39o69-95i107-126o150-178i209-230o250-276i	ExpAA=136.36	First60=23.31	PredHel=6	Topology=i13-35o71-93i106-128o157-179i202-224o259-281i
Rv2317	PROBABLE SUGAR-TRANSPORT INTEGRAL MEMBRANE PROTEIN ABC TRANSPORTER USPB	Not cytoplasm	Not extracellular	plasma membrane	Plasma membrane	CytoplasmicMembrane	0.954377	Rv2317 6 0 i12-32o69-95i107-126o138-156i193-214o239-260i	ExpAA=132.70	First60=22.60	PredHel=6	Topology=i12-34o71-93i106-128o138-160i181-203o238-260i	*
Rv2320c	PROBABLE CATIONIC AMINO ACID TRANSPORT INTEGRAL MEMBRANE PROTEIN ROCE	Not cytoplasm	Not extracellular	Not plasma membrane	Plasma membrane	CytoplasmicMembrane	0.967537	Rv2320c 12 0 i40-61o67-89i110-134o164-182i194-216o222-244i264-284o312-335i364-383o389-409i421-439o445-464i	ExpAA=264.05	First60=21.65	PredHel=12	Topology=i36-58o68-90i111-133o164-186i193-212o222-244i264-286o313-335i362-381o386-408i421-440o445-464i
Rv2325c	CONSERVED HYPOTHETICAL PROTEIN	Not cytoplasm	Not extracellular	plasma membrane	Plasma membrane	CytoplasmicMembrane	0.872622	Rv2325c 6 0 i40-66o86-110i122-141o169-192i213-231o259-280i	ExpAA=104.81	First60=25.09	PredHel=4	Topology=i19-36o51-73i86-108o123-145i
Rv2329c	PROBABLE NITRITE EXTRUSION PROTEIN 1 NARK1 (NITRITE FACILITATOR 1)	Not cytoplasm	Not extracellular	plasma membrane	Plasma membrane	CytoplasmicMembrane	0.969533	Rv2329c 12 0 i53-70o90-107i119-139o145-163i184-206o212-233i261-281o301-321i333-352o364-383i416-440o452-472i	ExpAA=261.30	First60=7.93	PredHel=12	Topology=i53-75o90-112i119-138o143-165i186-208o213-235i263-285o300-322i329-351o366-388i416-438o453-472i
Rv2330c	PROBABLE LIPOPROTEIN LPPP	Not cytoplasm	Not extracellular	plasma membrane	Extracell	Unknown	0.835255	Rv2330c 0 Y n7-26c31/32o	ExpAA=23.19	First60=22.55	PredHel=1	Topology=i7-29o	*	*
Rv2333c	PROBABLE CONSERVED INTEGRAL MEMBRANE TRANSPORT PROTEIN	Not cytoplasm	Not extracellular	plasma membrane	Plasma membrane	CytoplasmicMembrane	0.969592	Rv2333c 14 0 i7-26o46-68i75-98o104-124i136-155o161-182i194-214o220-242i262-280o300-320i327-346o352-376i397-417o478	ExpAA=304.79	First60=39.19	PredHel=14	Topology=i7-29o44-66i73-95o105-127i134-156o161-183i196-214o219-241i261-283o298-320i327-344o354-376i397-419o473-495i	*
Rv2339	PROBABLE CONSERVED TRANSMEMBRANE TRANSPORT PROTEIN MMPL9	Not cytoplasm	Not extracellular	plasma membrane	Plasma membrane	CytoplasmicMembrane	0.816319	Rv2339 12 0 i25-45o201-218i225-250o256-280i301-322o334-359i380-402o770-789i796-820o826-846i867-890o896-915i	ExpAA=259.00	First60=20.17	PredHel=11	Topology=o23-45i201-223o256-278i303-325o340-362i383-405o770-788i795-817o827-849i869-891o896-918i
Rv2345	POSSIBLE CONSERVED TRANSMEMBRANE PROTEIN	cytoplasm	Not extracellular	Not plasma membrane	Plasma membrane	CytoplasmicMembrane	0.57627	Rv2345 1 Y n10-21c26/27o162-181i	ExpAA=57.99	First60=19.72	PredHel=3	Topology=i7-26o162-181i609-631o	*
Rv2348c	HYPOTHETICAL PROTEIN	No Prediction	No Prediction	No Prediction	Cytoplasm	Cytoplasmic	0.525773	Rv2348c 0 0 i	ExpAA=0.00	First60=0.00	PredHel=0	Topology=o
Rv2349c	PROBABLE PHOSPHOLIPASE C 3 PLCC	Not cytoplasm	Not extracellular	plasma membrane	Extracell	Extracellular	0.623247	Rv2349c 0 Y n10-19c23/24o	ExpAA=1.02	First60=0.94	PredHel=0	Topology=o	*	*
Rv2350c	PROBABLE MEMBRANE-ASSOCIATED PHOSPHOLIPASE C 2 PLCB	Not cytoplasm	Not extracellular	plasma membrane	Extracell	Extracellular	0.63281	Rv2350c 0 Y n10-19c23/24o	ExpAA=3.91	First60=3.39	PredHel=0	Topology=o	*	*
Rv2351c	PROBABLE MEMBRANE-ASSOCIATED PHOSPHOLIPASE C 1 PLCA (MTP40 ANTIGEN)	Not cytoplasm	Not extracellular	plasma membrane	Extracell	Extracellular	0.596968	Rv2351c 0 Y n10-19c23/24o	ExpAA=0.29	First60=0.18	PredHel=0	Topology=o	*	*
Rv2353c	PPE FAMILY PROTEIN	Not cytoplasm	Not extracellular	plasma membrane	Extracell	Extracellular	0.944247	Rv2353c 0 0 i	ExpAA=3.36	First60=0.00	PredHel=0	Topology=o		*
Rv2356c	PPE FAMILY PROTEIN	Not cytoplasm	Not extracellular	plasma membrane	Extracell	Extracellular	0.769622	Rv2356c 0 0 i	ExpAA=13.17	First60=4.72	PredHel=0	Topology=o
Rv2376c	LOW MOLECULAR	Not cytoplasm	extracellular	Not plasma membrane	Extracell	Extracellular	0.730046	Rv2376c 0 Y n6-17c21/22o	ExpAA=22.86	First60=22.85	PredHel=1	Topology=i7-29o	*
Rv2387	CONSERVED HYPOTHETICAL PROTEIN	Not cytoplasm	Not extracellular	plasma membrane	Plasma membrane	CytoplasmicMembrane	0.972417	Rv2387 10 0 o12-31i38-56o68-93i105-129o135-156i245-266o278-299i311-335o347-365i377-399o	ExpAA=216.78	First60=41.72	PredHel=10	Topology=o5-27i34-56o71-93i109-131o135-157i245-267o277-299i311-333o343-365i377-399o
Rv2389c	PROBABLE RESUSCITATION-PROMOTING FACTOR RPFD	Not cytoplasm	Not extracellular	plasma membrane	Extracell	Unknown	0.891437	Rv2389c 1 0 i21-42o	ExpAA=21.98	First60=21.86	PredHel=1	Topology=i21-43o	*
Rv2395	PROBABLE CONSERVED INTEGRAL MEMBRANE PROTEIN	Not cytoplasm	Not extracellular	plasma membrane	Plasma membrane	CytoplasmicMembrane	0.970973	Rv2395 18 0 i12-33o39-59i71-94o100-119i159-181o187-207i212-235o261-287i308-330o345-366i378-397o409-427i448	ExpAA=391.67	First60=43.64	PredHel=18	Topology=i13-32o37-59i72-94o99-121i159-181o191-213i215-237o265-287i308-330o345-367i379-401o405-427i448-470o474-496i501-523o543-565i586-608o623-641i
Rv2398c	PROBABLE SULFATE-TRANSPORT INTEGRAL MEMBRANE PROTEIN ABC TRANSPORTER CYSW	Not cytoplasm	Not extracellular	plasma membrane	Plasma membrane	CytoplasmicMembrane	0.953284	Rv2398c 6 0 i9-32o52-81i93-115o127-151i192-218o238-261i	ExpAA=131.81	First60=28.00	PredHel=6	Topology=i13-35o59-81i94-116o131-151i190-212o239-261i
Rv2399c	PROBABLE SULFATE-TRANSPORT INTEGRAL MEMBRANE PROTEIN ABC TRANSPORTER CYST	Not cytoplasm	Not extracellular	plasma membrane	Plasma membrane	CytoplasmicMembrane	0.946305	Rv2399c 6 0 i32-52o72-98i110-132o144-168i189-210o250-271i	ExpAA=133.59	First60=22.25	PredHel=6	Topology=i34-56o76-98i110-132o147-169i189-211o250-272i
Rv2409c	CONSERVED HYPOTHETICAL PROTEIN	No Prediction	No Prediction	No Prediction	Cytoplasm	Cytoplasmic	0.610906	Rv2409c 0 0 i	ExpAA=0.01	First60=0.00	PredHel=0	Topology=o
Rv2412	PROBABLE 30S RIBOSOMAL PROTEIN S20 RPST	cytoplasm	Not extracellular	Not plasma membrane	Cytoplasm	Unknown	0.634096	Rv2412 0 0 i	ExpAA=0.00	First60=0.00	PredHel=0	Topology=i		*
Rv2414c	CONSERVED HYPOTHETICAL PROTEIN	Not cytoplasm	Not extracellular	plasma membrane	Plasma membrane	CytoplasmicMembrane	0.934065	Rv2414c 13 0 i12-28o34-54i66-86o242-264i271-287o293-310i315-333o339-356i368-390o396-425i432-451o457-480i492	ExpAA=240.58	First60=35.55	PredHel=10	Topology=o10-32i37-54o64-86i266-288o293-310i323-357o372-394i401-423o457-479i486-508o
Rv2415c	CONSERVED HYPOTHETICAL PROTEIN	Not cytoplasm	Not extracellular	plasma membrane	Cytoplasm	CytoplasmicMembrane	0.734876	Rv2415c 1 0 i80-99o	ExpAA=28.66	First60=0.00	PredHel=1	Topology=i78-100o
Rv2433c	HYPOTHETICAL PROTEIN	cytoplasm	Not extracellular	Not plasma membrane	Cytoplasm	Unknown	0.963583	Rv2433c 2 0 i29-47o59-80i	ExpAA=39.42	First60=20.09	PredHel=2	Topology=i26-48o58-80i
Rv2434c	PROBABLE CONSERVED TRANSMEMBRANE PROTEIN	Not cytoplasm	Not extracellular	plasma membrane	Plasma membrane	CytoplasmicMembrane	0.643235	Rv2434c 5 0 o6-26i47-64o76-98i110-135o141-172i	ExpAA=102.65	First60=36.43	PredHel=5	Topology=i7-29o44-63i76-98o113-135i140-162o
Rv2437	CONSERVED TRANSMEMBRANE PROTEIN	Not cytoplasm	Not extracellular	plasma membrane	Plasma membrane	Unknown	0.88108	Rv2437 2 0 i21-39o70-99i	ExpAA=46.43	First60=21.84	PredHel=2	Topology=i17-39o76-98i
Rv2442c	PROBABLE 50S RIBOSOMAL PROTEIN L21 RPLU	cytoplasm	Not extracellular	Not plasma membrane	Cell wall	Unknown	0.746594	Rv2442c 0 0 i	ExpAA=0.00	First60=0.00	PredHel=0	Topology=i
Rv2443	PROBABLE C4-DICARBOXYLATE-TRANSPORT TRANSMEMBRANE PROTEIN DCTA	Not cytoplasm	Not extracellular	plasma membrane	Plasma membrane	CytoplasmicMembrane	0.865655	Rv2443 9 0 i25-45o57-81i93-116o166-184i204-229o235-257i277-295o315-335i347-372o	ExpAA=185.23	First60=25.23	PredHel=7	Topology=i25-47o57-79i91-113o169-191i204-226o236-258i347-369o
Rv2446c	PROBABLE CONSERVED INTEGRAL MEMBRANE PROTEIN	Not cytoplasm	Not extracellular	plasma membrane	Plasma membrane	CytoplasmicMembrane	0.963021	Rv2446c 3 0 o15-37i49-66o86-109i	ExpAA=67.68	First60=36.92	PredHel=3	Topology=o15-37i44-66o86-108i
Rv2450c	PROBABLE RESUSCITATION-PROMOTING FACTOR RPFE	Not cytoplasm	extracellular	Not plasma membrane	Cytoplasm	Unknown	0.767855	Rv2450c 0 Y n8-19c28/29o	ExpAA=7.04	First60=7.03	PredHel=0	Topology=o	*
Rv2451	HYPOTHETICAL PROLINE AND SERINE RICH PROTEIN	Not cytoplasm	extracellular	Not plasma membrane	Extracell	Unknown	0.589733	Rv2451 0 0 i	ExpAA=0.01	First60=0.00	PredHel=0	Topology=o		*
Rv2452c	HYPOTHETICAL PROTEIN	No Prediction	No Prediction	No Prediction	Short sequence	Unknown	0.873165	Rv2452c 0 Y n6-19c27/28o	ExpAA=18.89	First60=18.89	PredHel=1	Topology=i7-29o	*
Rv2456c	PROBABLE CONSERVED INTEGRAL MEMBRANE TRANSPORT PROTEIN	Not cytoplasm	Not extracellular	plasma membrane	Plasma membrane	CytoplasmicMembrane	0.957817	Rv2456c 11 0 o47-67i79-104o110-132i144-164o170-188i223-245o257-278i290-307o313-336i348-373o379-398i	ExpAA=221.88	First60=12.76	PredHel=10	Topology=o49-71i80-102o117-139i160-182o223-245i258-280o290-307i314-336o351-373i380-399o
Rv2459	PROBABLE CONSERVED INTEGRAL MEMBRANE TRANSPORT PROTEIN	Not cytoplasm	Not extracellular	plasma membrane	Plasma membrane	CytoplasmicMembrane	0.970089	Rv2459 14 0 i7-26o46-66i75-97o103-121i133-155o161-182i194-214o226-242i262-285o297-316i328-348o354-378i399-420o482	ExpAA=303.86	First60=39.61	PredHel=14	Topology=i7-29o44-66i73-95o99-121i134-156o161-183i196-214o224-242i262-284o299-321i328-345o355-377i398-420o475-497i
Rv2473	POSSIBLE ALANINE AND PROLINE RICH MEMBRANE PROTEIN	cytoplasm	Not extracellular	Not plasma membrane	Extracell	Unknown	0.883762	Rv2473 1 0 o82-103i	ExpAA=24.65	First60=3.12	PredHel=1	Topology=i82-104o
Rv2487c	PE-PGRS FAMILY PROTEIN	Not cytoplasm	Not extracellular	Not plasma membrane	Extracell	Extracellular	0.809083	Rv2487c 0 Y n3-14c32/33o	ExpAA=0.09	First60=0.03	PredHel=0	Topology=o	*
Rv2490c	PE-PGRS FAMILY PROTEIN	Not cytoplasm	Not extracellular	plasma membrane	Extracell	Extracellular	0.873735	Rv2490c 0 0 i	ExpAA=3.86	First60=0.07	PredHel=0	Topology=o
Rv2507	POSSIBLE CONSERVED PROLINE RICH MEMBRANE PROTEIN	Not cytoplasm	Not extracellular	plasma membrane	Extracell	Unknown	0.966924	Rv2507 1 0 o110-132i	ExpAA=23.02	First60=0.00	PredHel=1	Topology=o110-132i	*
Rv2508c	PROBABLE CONSERVED INTEGRAL MEMBRANE LEUCINE AND ALANINE RICH PROTEIN	Not cytoplasm	Not extracellular	plasma membrane	Plasma membrane	Unknown	0.972094	Rv2508c 12 0 i12-39o59-82i89-109o115-135i156-177o197-219i256-280o292-313i322-339o345-368i380-399o411-428i	ExpAA=259.94	First60=23.09	PredHel=12	Topology=i24-46o61-83i90-109o113-135i155-177o197-219i256-278o293-315i322-340o344-366i379-401o406-428i
Rv2517c	HYPOTHETICAL PROTEIN	No Prediction	No Prediction	No Prediction	Cytoplasm	Unknown	0.919413	Rv2517c 0 0 i	ExpAA=0.00	First60=0.00	PredHel=0	Topology=i
Rv2518c	PROBABLE CONSERVED LIPOPROTEIN LPPS	Not cytoplasm	Not extracellular	plasma membrane	Cytoplasm	Unknown	0.70702	Rv2518c 1 0 i20-40o	ExpAA=20.29	First60=20.15	PredHel=1	Topology=i20-42o	*	*
Rv2519	PE FAMILY PROTEIN	Not cytoplasm	Not extracellular	plasma membrane	Extracell	Unknown	0.756887	Rv2519 0 Y n4-15c33/34o	ExpAA=0.31	First60=0.20	PredHel=0	Topology=o	*
Rv2521	PROBABLE BACTERIOFERRITIN COMIGRATORY PROTEIN BCP	cytoplasm	Not extracellular	Not plasma membrane	Cytoplasm	Unknown	0.795731	Rv2521 0 0 i	ExpAA=0.00	First60=0.00	PredHel=0	Topology=o
Rv2525c	CONSERVED HYPOTHETICAL PROTEIN	Not cytoplasm	Not extracellular	Not plasma membrane	Extracell	Unknown	0.776706	Rv2525c 0 Y n11-22c30/31o	ExpAA=4.55	First60=4.37	PredHel=0	Topology=o	*	*
Rv2532c	HYPOTHETICAL PROTEIN	No Prediction	No Prediction	No Prediction	Plasma membrane	Cytoplasmic	0.873332	Rv2532c 2 Y n8-16c21/22o31-52i73-93o	ExpAA=51.68	First60=42.40	PredHel=2	Topology=i9-31o36-58i	*
Rv2534c	PROBABLE ELONGATION FACTOR P EFP	cytoplasm	Not extracellular	Not plasma membrane	Cytoplasm	Cytoplasmic	0.568233	Rv2534c 0 0 i	ExpAA=0.02	First60=0.02	PredHel=0	Topology=o
Rv2536	PROBABLE CONSERVED TRANSMEMBRANE PROTEIN	Not cytoplasm	extracellular	Not plasma membrane	Plasma membrane	CytoplasmicMembrane	0.942557	Rv2536 3 Y n8-18c23/24o33-54i75-98o110-136i	ExpAA=87.08	First60=41.64	PredHel=4	Topology=i7-26o31-53i73-95o110-132i	*
Rv2537c	3-DEHYDROQUINATE DEHYDRATASE AROD (AROQ) (3-DEHYDROQUINASE) (TYPE II DHQASE)	Not cytoplasm	Not extracellular	Not plasma membrane	Cytoplasm	Cytoplasmic	0.758974	Rv2537c 1 0 i117-142o	ExpAA=20.81	First60=0.00	PredHel=1	Topology=i116-138o
Rv2551c	CONSERVED HYPOTHETICAL PROTEIN	Not cytoplasm	Not extracellular	plasma membrane	Plasma membrane	CytoplasmicMembrane	0.96068	Rv2551c 3 Y n2-12c16/17o26-42i49-72o92-116i	ExpAA=75.25	First60=31.45	PredHel=4	Topology=i26-43o48-70i77-99o119-138i
Rv2556c	CONSERVED HYPOTHETICAL PROTEIN	cytoplasm	Not extracellular	Not plasma membrane	Cytoplasm	Cytoplasmic	0.520294	Rv2556c 0 0 i	ExpAA=0.27	First60=0.13	PredHel=0	Topology=i
Rv2560	PROBABLE PROLINE AND GLYCINE RICH TRANSMEMBRANE PROTEIN	Not cytoplasm	Not extracellular	plasma membrane	Extracell	CytoplasmicMembrane	0.954937	Rv2560 4 0 i96-125o145-168i199-232o265-293i	ExpAA=102.02	First60=0.00	PredHel=4	Topology=i103-125o145-167i197-228o271-293i
Rv2563	PROBABLE GLUTAMINE-TRANSPORT TRANSMEMBRANE PROTEIN ABC TRANSPORTER	Not cytoplasm	Not extracellular	plasma membrane	Plasma membrane	CytoplasmicMembrane	0.70509	Rv2563 4 0 i16-37o230-253i274-300o312-334i	ExpAA=92.53	First60=22.37	PredHel=4	Topology=i16-38o231-253i274-296o306-328i	*
Rv2569c	CONSERVED HYPOTHETICAL PROTEIN	cytoplasm	Not extracellular	plasma membrane	Cytoplasm	Unknown	0.541282	Rv2569c 0 0 i	ExpAA=0.03	First60=0.00	PredHel=0	Topology=o
Rv2571c	PROBABLE TRANSMEMBRANE ALANINE AND VALINE AND LEUCINE RICH PROTEIN	Not cytoplasm	Not extracellular	plasma membrane	Plasma membrane	CytoplasmicMembrane	0.909676	Rv2571c 6 0 i23-41o47-67i74-92o98-118i125-147o153-170i	ExpAA=125.08	First60=30.50	PredHel=6	Topology=i21-40o50-69i76-93o98-120i125-147o157-179i
Rv2575	POSSIBLE CONSERVED MEMBRANE GLYCINE RICH PROTEIN	Not cytoplasm	Not extracellular	plasma membrane	Extracell	Unknown	0.924103	Rv2575 1 0 i25-45o	ExpAA=20.99	First60=20.97	PredHel=1	Topology=i21-43o		*
Rv2576c	POSSIBLE CONSERVED MEMBRANE PROTEIN	Not cytoplasm	Not extracellular	Not plasma membrane	Extracell	Unknown	0.905988	Rv2576c 1 0 o20-43i	ExpAA=21.66	First60=21.04	PredHel=1	Topology=o20-42i	*
Rv2577	CONSERVED HYPOTHETICAL PROTEIN	Not cytoplasm	extracellular	Not plasma membrane	Extracell	Unknown	0.867985	Rv2577 0 0 i	ExpAA=8.75	First60=8.66	PredHel=0	Topology=o		*
Rv2582	PROBABLE PEPTIDYL-PROLYL CIS-TRANS ISOMERASE B PPIB (CYCLOPHILIN) (PPIASE) (ROTAMASE) (PEPTIDYLPROLYL ISOMERASE)	cytoplasm	Not extracellular	Not plasma membrane	Extracell	Cytoplasmic	0.943272	Rv2582 1 0 i47-70o	ExpAA=23.44	First60=14.28	PredHel=1	Topology=i47-69o
Rv2586c	PROBABLE PROTEIN-EXPORT MEMBRANE PROTEIN SECF	Not cytoplasm	Not extracellular	plasma membrane	Plasma membrane	CytoplasmicMembrane	0.902836	Rv2586c 6 0 i66-87o191-208i215-236o242-263i301-321o327-350i	ExpAA=129.65	First60=0.00	PredHel=6	Topology=i66-88o191-208i215-237o241-263i301-323o328-350i
Rv2587c	PROBABLE PROTEIN-EXPORT MEMBRANE PROTEIN SECD	Not cytoplasm	Not extracellular	plasma membrane	Extracell	CytoplasmicMembrane	0.896527	Rv2587c 6 0 i12-30o383-403i410-434o440-461i489-508o514-539i	ExpAA=128.97	First60=19.55	PredHel=6	Topology=i13-32o385-403i408-430o440-462i489-511o516-538i
Rv2588c	PROBABLE CONSERVED MEMBRANE PROTEIN SECRETION FACTOR YAJC	Not cytoplasm	extracellular	Not plasma membrane	Cytoplasm	Cytoplasmic	0.830007	Rv2588c 1 0 o6-22i	ExpAA=18.43	First60=18.43	PredHel=1	Topology=o4-21i
Rv2591	PE-PGRS FAMILY PROTEIN	Not cytoplasm	Not extracellular	plasma membrane	Extracell	Extracellular	0.746435	Rv2591 0 0 i	ExpAA=55.03	First60=0.12	PredHel=0	Topology=o
Rv2599	Rv2599	Not cytoplasm	Not extracellular	plasma membrane	Extracell	Unknown	0.950908	Rv2599 0 Y n6-17c24/25o	ExpAA=22.05	First60=21.99	PredHel=1	Topology=i7-29o	*
Rv2600	PROBABLE CONSERVED INTEGRAL MEMBRANE PROTEIN	Not cytoplasm	Not extracellular	plasma membrane	Plasma membrane	CytoplasmicMembrane	0.96407	Rv2600 4 0 o6-30i42-63o75-97i109-132o	ExpAA=89.74	First60=41.47	PredHel=4	Topology=i5-27o42-64i71-93o113-132i
Rv2601	PROBABLE SPERMIDINE SYNTHASE SPEE (PUTRESCINE AMINOPROPYLTRANSFERASE) (AMINOPROPYLTRANSFERASE) (SPDSY)	cytoplasm	Not extracellular	Not plasma membrane	Cytoplasm	Unknown	0.788473	Rv2601 7 0 i20-44o50-72i79-104o116-140i160-178o184-206i215-234o	ExpAA=155.43	First60=32.63	PredHel=7	Topology=i21-40o50-72i79-101o116-135i155-177o187-206i215-237o
Rv2612c	PROBABLE PI SYNTHASE PGSA1 (PHOSPHATIDYLINOSITOL SYNTHASE) (CDP-DIACYLGLYCEROL--INOSITOL3-PHOSPHATIDYLTRANSFERASE)	Not cytoplasm	Not extracellular	plasma membrane	Plasma membrane	CytoplasmicMembrane	0.843105	Rv2612c 6 0 i28-49o55-74i95-112o118-136i156-173o179-200i	ExpAA=71.44	First60=23.84	PredHel=3	Topology=o45-67i117-134o170-192i	*
Rv2615c	PE-PGRS FAMILY PROTEIN	Not cytoplasm	Not extracellular	plasma membrane	Extracell	Extracellular	0.845867	Rv2615c 0 0 i	ExpAA=0.04	First60=0.01	PredHel=0	Topology=o	*
Rv2617c	PROBABLE TRANSMEMBRANE PROTEIN	Not cytoplasm	Not extracellular	plasma membrane	Plasma membrane	CytoplasmicMembrane	0.935109	Rv2617c 3 0 o20-39i71-89o95-115i	ExpAA=65.28	First60=19.84	PredHel=3	Topology=i20-39o66-88i93-115o
Rv2620c	PROBABLE CONSERVED TRANSMEMBRANE PROTEIN	Not cytoplasm	Not extracellular	plasma membrane	Plasma membrane	CytoplasmicMembrane	0.965192	Rv2620c 4 0 o6-27i47-70o76-94i119-139o	ExpAA=87.53	First60=35.46	PredHel=4	Topology=o5-27i47-69o74-96i117-139o
Rv2625c	PROBABLE CONSERVED TRANSMEMBRANE ALANINE AND LEUCINE RICH PROTEIN	Not cytoplasm	Not extracellular	plasma membrane	Plasma membrane	CytoplasmicMembrane	0.912017	Rv2625c 6 0 i12-33o45-65i77-96o108-130i137-159o194-226i	ExpAA=133.77	First60=38.35	PredHel=6	Topology=i13-35o45-64i77-99o109-131i138-160o207-229i	*
Rv2634c	PE-PGRS FAMILY PROTEIN	Not cytoplasm	Not extracellular	Not plasma membrane	Extracell	Extracellular	0.814233	Rv2634c 0 0 i	ExpAA=13.82	First60=0.55	PredHel=0	Topology=o
Rv2635	HYPOTHETICAL PROTEIN	cytoplasm	Not extracellular	Not plasma membrane	Extracell	Unknown	0.737882	Rv2635 0 0 i	ExpAA=0.00	First60=0.00	PredHel=0	Topology=o
Rv2637	POSSIBLE TRANSMEMBRANE PROTEIN DEDA	Not cytoplasm	Not extracellular	plasma membrane	Plasma membrane	CytoplasmicMembrane	0.931509	Rv2637 5 0 o13-38i50-75o116-135i142-163o175-194i	ExpAA=103.42	First60=30.74	PredHel=4	Topology=i12-34o54-76i143-165o175-194i
Rv2639c	PROBABLE CONSERVED INTEGRAL MEMBRANE PROTEIN	Not cytoplasm	Not extracellular	plasma membrane	Cytoplasm	CytoplasmicMembrane	0.979059	Rv2639c 4 0 o6-24i33-52o58-76i88-106o	ExpAA=81.20	First60=42.94	PredHel=4	Topology=i5-27o32-51i58-80o90-107i
Rv2643	PROBABLE ARSENIC-TRANSPORT INTEGRAL MEMBRANE PROTEIN ARSC	Not cytoplasm	Not extracellular	plasma membrane	Plasma membrane	CytoplasmicMembrane	0.955136	Rv2643 10 0 i23-42o57-78i90-114o120-139i151-173o193-212i233-251o263-285i297-319o325-347i	ExpAA=214.18	First60=26.93	PredHel=10	Topology=i23-42o52-74i95-114o124-143i150-172o187-209i229-251o266-288i295-317o327-349i
Rv2653c	POSSIBLE phiRv2 PROPHAGE PROTEIN	Not cytoplasm	Not extracellular	Not plasma membrane	Cytoplasm	Unknown	0.779259	Rv2653c 0 0 i	ExpAA=0.00	First60=0.00	PredHel=0	Topology=i
Rv2672	POSSIBLE SECRETED PROTEASE	Not cytoplasm	Not extracellular	plasma membrane	Plasma membrane	Unknown	0.559083	Rv2672 0 Y n17-30c35/36o	ExpAA=21.90	First60=21.34	PredHel=1	Topology=i13-35o	*
Rv2673	POSSIBLE CONSERVED INTEGRAL MEMBRANE PROTEIN	Not cytoplasm	Not extracellular	plasma membrane	Plasma membrane	CytoplasmicMembrane	0.939448	Rv2673 10 0 i117-134o140-157i164-185o197-218i225-244o280-301i310-328o334-353i360-377o389-407i	ExpAA=195.72	First60=4.60	PredHel=8	Topology=o113-135i163-185o195-217i224-243o279-301i310-332o352-374i386-408o		*
Rv2684	PROBABLE ARSENIC-TRANSPORT INTEGRAL MEMBRANE PROTEIN ARSA	Not cytoplasm	Not extracellular	plasma membrane	Plasma membrane	CytoplasmicMembrane	0.947498	Rv2684 10 Y n4-15c33/34o57-83i95-120o173-196i223-240o246-266i278-297o309-327i334-355o361-384i405-426o	ExpAA=229.72	First60=36.31	PredHel=10	Topology=o4-18i25-47o57-76i97-119o179-201i222-244o279-301i308-330o362-384i405-427o
Rv2685	PROBABLE ARSENIC-TRANSPORT INTEGRAL MEMBRANE PROTEIN ARSB1	Not cytoplasm	Not extracellular	plasma membrane	Plasma membrane	CytoplasmicMembrane	0.934177	Rv2685 10 Y n3-11c16/17o26-46i58-83o95-125i137-154o174-196i223-240o246-264i276-293o360-384i405-422o	ExpAA=201.78	First60=27.85	PredHel=9	Topology=i21-40o55-77i98-120o174-196i222-244o279-301i314-331o362-384i405-427o
Rv2686c	PROBABLE ANTIBIOTIC-TRANSPORT INTEGRAL MEMBRANE LEUCINE AND ALANINE AND VALINE RICH PROTEIN ABC TRANSPORTER	Not cytoplasm	Not extracellular	plasma membrane	Plasma membrane	CytoplasmicMembrane	0.961248	Rv2686c 7 Y n3-9c14/15o30-52i64-92o112-131i143-169o175-195i202-219o225-244i	ExpAA=133.84	First60=22.70	PredHel=6	Topology=i28-50o70-92i113-132o147-169i176-198o222-244i
Rv2687c	PROBABLE ANTIBIOTIC-TRANSPORT INTEGRAL MEMBRANE LEUCINE AND VALINE RICH PROTEIN ABC TRANSPORTER	Not cytoplasm	Not extracellular	plasma membrane	Plasma membrane	CytoplasmicMembrane	0.970372	Rv2687c 6 0 i20-42o48-69i90-112o118-138i150-170o199-219i	ExpAA=131.27	First60=33.03	PredHel=6	Topology=i20-42o47-69i90-112o122-144i151-173o199-221i
Rv2690c	PROBABLE CONSERVED INTEGRAL MEMBRANE ALANINE AND VALINE AND LEUCINE RICH PROTEIN	Not cytoplasm	Not extracellular	plasma membrane	Plasma membrane	CytoplasmicMembrane	0.919708	Rv2690c 12 0 i31-48o60-84i105-128o148-166i178-198o218-241i262-282o320-349i370-392o398-420i441-459o465-483i	ExpAA=237.79	First60=7.44	PredHel=11	Topology=o59-81i111-133o148-166i171-193o218-240i260-282o315-337i370-392o396-418i439-458o462-484i
Rv2693c	PROBABLE CONSERVED INTEGRAL MEMBRANE ALANINE AND LEUCINE RICH PROTEIN	Not cytoplasm	Not extracellular	plasma membrane	Plasma membrane	CytoplasmicMembrane	0.970292	Rv2693c 6 0 i12-34o40-60i67-85o91-112i137-158o170-194i	ExpAA=131.67	First60=44.85	PredHel=6	Topology=i12-34o38-60i67-86o90-112i137-159o172-194i	*
Rv2698	PROBABLE CONSERVED ALANINE RICH TRANSMEMBRANE PROTEIN	cytoplasm	Not extracellular	Not plasma membrane	Plasma membrane	Unknown	0.897386	Rv2698 2 0 i21-42o48-66i	ExpAA=41.73	First60=35.07	PredHel=2	Topology=i21-43o48-66i
Rv2700	POSSIBLE CONSERVED SECRETED ALANINE RICH PROTEIN	cytoplasm	Not extracellular	plasma membrane	Plasma membrane	Unknown	0.62424	Rv2700 1 0 i26-44o	ExpAA=20.27	First60=20.18	PredHel=1	Topology=i26-45o	*
Rv2707	PROBABLE CONSERVED TRANSMEMBRANE ALANINE AND LEUCINE RICH PROTEIN	Not cytoplasm	Not extracellular	plasma membrane	Plasma membrane	CytoplasmicMembrane	0.952081	Rv2707 6 0 i36-59o106-126i146-167o187-206i218-242o248-272i	ExpAA=129.39	First60=19.25	PredHel=6	Topology=i37-59o104-126i146-168o183-205i218-240o250-272i
Rv2708c	CONSERVED HYPOTHETICAL PROTEIN	No Prediction	No Prediction	No Prediction	Cytoplasm	Cytoplasmic	0.767831	Rv2708c 0 0 i	ExpAA=0.20	First60=0.20	PredHel=0	Topology=o
Rv2709	PROBABLE CONSERVED TRANSMEMBRANE PROTEIN	Not cytoplasm	Not extracellular	plasma membrane	Cytoplasm	Unknown	0.941156	Rv2709 2 0 i52-71o77-97i	ExpAA=39.47	First60=6.67	PredHel=2	Topology=i55-72o76-98i
Rv2719c	POSSIBLE CONSERVED MEMBRANE PROTEIN	Not cytoplasm	extracellular	Not plasma membrane	Cytoplasm	Unknown	0.80879	Rv2719c 1 0 o67-87i	ExpAA=21.79	First60=0.00	PredHel=1	Topology=o64-86i
Rv2721c	POSSIBLE CONSERVED TRANSMEMBRANE ALANINE AND GLYCINE RICH PROTEIN	Not cytoplasm	extracellular	plasma membrane	Cytoplasm	Cellwall	0.834745	Rv2721c 1 Y n15-30c35/36o422-445i	ExpAA=44.92	First60=21.65	PredHel=2	Topology=i13-35o420-442i	*	*
Rv2723	PROBABLE CONSERVED INTEGRAL MEMBRANE PROTEIN	Not cytoplasm	Not extracellular	plasma membrane	Plasma membrane	CytoplasmicMembrane	0.962856	Rv2723 9 0 o6-26i38-59o79-96i103-126o132-148i198-221o227-248i255-275o303-321i	ExpAA=196.10	First60=43.46	PredHel=9	Topology=o5-27i40-62o77-99i104-126o131-153i199-221o226-248i255-277o297-319i
Rv2729c	PROBABLE CONSERVED INTEGRAL MEMBRANE ALANINE VALINE AND LEUCINE RICH PROTEIN	Not cytoplasm	Not extracellular	plasma membrane	Plasma membrane	CytoplasmicMembrane	0.966104	Rv2729c 9 0 o6-25i51-70o76-95i107-129o135-156i163-182o194-216i223-246o258-278i	ExpAA=188.85	First60=31.76	PredHel=9	Topology=o4-23i52-71o76-95i107-129o134-156i163-182o197-216i223-245o255-277i	*
Rv2732c	PROBABLE CONSERVED TRANSMEMBRANE PROTEIN	Not cytoplasm	Not extracellular	plasma membrane	Plasma membrane	CytoplasmicMembrane	0.94587	Rv2732c 4 0 i33-51o80-98i105-125o137-155i	ExpAA=86.72	First60=21.89	PredHel=4	Topology=i33-55o75-97i102-124o137-159i
Rv2741	PE-PGRS FAMILY PROTEIN	Not cytoplasm	Not extracellular	plasma membrane	Extracell	Extracellular	0.746163	Rv2741 0 Y n4-15c33/34o	ExpAA=11.05	First60=1.61	PredHel=0	Topology=o	*
Rv2743c	POSSIBLE CONSERVED TRANSMEMBRANE ALANINE RICH PROTEIN	Not cytoplasm	Not extracellular	plasma membrane	Plasma membrane	Unknown	0.746214	Rv2743c 2 0 i50-74o80-100i	ExpAA=44.58	First60=8.82	PredHel=2	Topology=i50-72o77-99i
Rv2746c	PROBABLE PGP SYNTHASE PGSA3 (CDP-DIACYLGLYCEROL--GLYCEROL-3-PHOSPHATE 3- PHOSPHATIDYLTRANSFERASE) (PHOSPHATIDYLGLYCEROPHOSPHATE SYNTHASE)	Not cytoplasm	Not extracellular	plasma membrane	Plasma membrane	CytoplasmicMembrane	0.902357	Rv2746c 4 0 i29-50o115-137i149-167o173-195i	ExpAA=86.91	First60=22.32	PredHel=4	Topology=i29-51o116-138i151-168o173-195i
Rv2748c	POSSIBLE CELL DIVISION TRANSMEMBRANE PROTEIN FTSK	Not cytoplasm	Not extracellular	plasma membrane	Cytoplasm	CytoplasmicMembrane	0.672339	Rv2748c 4 0 i149-167o179-204i216-235o265-288i	ExpAA=103.75	First60=0.47	PredHel=4	Topology=i149-166o181-203i216-238o266-288i
Rv2767c	POSSIBLE MEMBRANE PROTEIN	No Prediction	No Prediction	No Prediction	Cytoplasm	Unknown	0.817659	Rv2767c 1 0 o66-91i	ExpAA=20.17	First60=0.00	PredHel=1	Topology=o69-91i		*
Rv2772c	PROBABLE CONSERVED TRANSMEMBRANE PROTEIN	Not cytoplasm	extracellular	plasma membrane	Cytoplasm	Cytoplasmic	0.860802	Rv2772c 2 0 o6-27i39-60o	ExpAA=45.16	First60=43.41	PredHel=2	Topology=i7-29o39-61i	*
Rv2784c	PROBABLE LIPOPROTEIN LPPU	No Prediction	No Prediction	No Prediction	Extracell	Unknown	0.586291	Rv2784c 0 Y n5-16c21/22o	ExpAA=5.60	First60=5.59	PredHel=0	Topology=o	*		*
Rv2799	PROBABLE MEMBRANE PROTEIN	cytoplasm	Not extracellular	Not plasma membrane	Extracell	Unknown	0.872394	Rv2799 1 0 i21-40o	ExpAA=22.32	First60=22.00	PredHel=1	Topology=i21-43o	*
Rv2806	POSSIBLE MEMBRANE PROTEIN	No Prediction	No Prediction	No Prediction	Plasma membrane	Unknown	0.982183	Rv2806 2 0 i7-27o33-51i	ExpAA=42.94	First60=42.94	PredHel=2	Topology=i7-29o33-55i	*
Rv2834c	PROBABLE Sn-GLYCEROL-3-PHOSPHATE TRANSPORT INTEGRAL MEMBRANE PROTEIN ABC TRANSPORTER UGPE	Not cytoplasm	Not extracellular	plasma membrane	Plasma membrane	CytoplasmicMembrane	0.960264	Rv2834c 6 0 i12-31o74-98i105-129o141-159i180-202o239-260i	ExpAA=133.70	First60=22.48	PredHel=6	Topology=i12-34o75-97i104-123o138-160i180-202o238-260i	*
Rv2835c	PROBABLE Sn-GLYCEROL-3-PHOSPHATE TRANSPORT INTEGRAL MEMBRANE PROTEIN ABC TRANSPORTER UGPA	Not cytoplasm	Not extracellular	plasma membrane	Plasma membrane	CytoplasmicMembrane	0.951998	Rv2835c 6 0 i20-38o79-105i117-138o165-189i223-242o272-294i	ExpAA=130.36	First60=22.21	PredHel=6	Topology=i20-42o79-101i114-136o165-187i224-246o270-292i
Rv2836c	POSSIBLE DNA-DAMAGE-INDUCIBLE PROTEIN F DINF	Not cytoplasm	Not extracellular	plasma membrane	Plasma membrane	CytoplasmicMembrane	0.968075	Rv2836c 11 Y n13-21c25/26o41-68i95-120o132-153i165-185o197-217i238-261o273-296i308-329o349-371i378-398o404-423i	ExpAA=265.39	First60=36.34	PredHel=12	Topology=i13-35o50-72i93-115o130-152i165-187o197-219i239-261o271-293i306-328o343-365i378-400o404-426i
Rv2843	PROBABLE CONSERVED TRANSMEMBRANE ALANINE RICH PROTEIN	Not cytoplasm	extracellular	Not plasma membrane	Extracell	CytoplasmicMembrane	0.889761	Rv2843 0 Y n20-31c36/37o	ExpAA=61.76	First60=21.34	PredHel=2	Topology=i20-42o62-84i	*		*
Rv2846c	POSSIBLE INTEGRAL MEMBRANE EFFLUX PROTEIN EFPA	Not cytoplasm	Not extracellular	plasma membrane	Plasma membrane	CytoplasmicMembrane	0.971222	Rv2846c 14 0 i50-76o88-108i120-139o145-166i178-202o208-228i240-259o265-287i307-331o337-359i371-389o401-425i437	ExpAA=305.99	First60=11.27	PredHel=14	Topology=i51-73o88-107i120-139o144-166i179-201o206-228i241-260o265-287i307-329o339-361i368-390o405-427i436-458o487-509i
Rv2853	PE-PGRS FAMILY PROTEIN	Not cytoplasm	Not extracellular	Not plasma membrane	Extracell	Extracellular	0.860084	Rv2853 0 0 i	ExpAA=0.13	First60=0.05	PredHel=0	Topology=o
Rv2856	POSSIBLE NICKEL-TRANSPORT INTEGRAL MEMBRANE PROTEIN NICT	Not cytoplasm	Not extracellular	plasma membrane	Plasma membrane	CytoplasmicMembrane	0.962098	Rv2856 7 0 o25-50i102-127o147-172i218-240o246-268i288-315o335-355i	ExpAA=179.82	First60=26.11	PredHel=8	Topology=i25-47o57-79i102-124o154-176i216-238o243-265i296-318o333-355i		*
Rv2869c	MEMBRANE BOUND METALLOPROTEASE	Not cytoplasm	Not extracellular	plasma membrane	Plasma membrane	CytoplasmicMembrane	0.678682	Rv2869c 3 Y n4-15c19/20o97-122i313-334o376-397i	ExpAA=92.89	First60=22.34	PredHel=4	Topology=o6-28i97-119o327-349i370-392o
Rv2874	POSSIBLE INTEGRAL MEMBRANE C-TYPE CYTOCHROME BIOGENESIS PROTEIN DIPZ	Not cytoplasm	Not extracellular	plasma membrane	Plasma membrane	CytoplasmicMembrane	0.743011	Rv2874 7 0 i114-131o137-155i176-200o206-227i248-274o280-304i325-346o	ExpAA=132.04	First60=0.05	PredHel=5	Topology=i117-139o178-200i250-272o282-304i325-347o	*	*
Rv2875	MAJOR SECRETED IMMUNOGENIC PROTEIN MPT70	Not cytoplasm	extracellular	Not plasma membrane	Extracell	Extracellular	0.920767	Rv2875 0 Y n7-22c30/31o	ExpAA=19.81	First60=19.61	PredHel=1	Topology=i7-29o	*
Rv2876	POSSIBLE CONSERVED TRANSMEMBRANE PROTEIN	Not cytoplasm	Not extracellular	plasma membrane	Cytoplasm	Unknown	0.954273	Rv2876 2 0 i52-72o78-96i	ExpAA=37.58	First60=9.32	PredHel=2	Topology=i51-68o78-97i
Rv2877c	PROBABLE CONSERVED INTEGRAL MEMBRANE PROTEIN	Not cytoplasm	Not extracellular	plasma membrane	Plasma membrane	CytoplasmicMembrane	0.955206	Rv2877c 7 0 o6-32i53-78o84-105i135-157o169-192i204-225o262-282i	ExpAA=160.31	First60=32.59	PredHel=7	Topology=o10-32i52-74o84-106i130-152o162-184i204-226o261-283i	*
Rv2878c	SOLUBLE SECRETED ANTIGEN MPT53 PRECURSOR	Not cytoplasm	extracellular	Not plasma membrane	Extracell	Extracellular	0.838099	Rv2878c 1 0 i12-30o	ExpAA=21.09	First60=20.93	PredHel=1	Topology=o15-37i	*
Rv2881c	PROBABLE INTEGRAL MEMBRANE PHOSPHATIDATE CYTIDYLYLTRANSFERASE CDSA (CDP-DIGLYCERIDE SYNTHETASE) (CDP-DIGLYCERIDE PYROPHOSPHORYLASE) (CDP-DIACYLGLYCEROL SYNTHASE) (CDS) (CTP:PHOSPHATIDATE CYTIDYLYLTRANSFERASE) (CDP-DAG SYNTHASE) (CDP-DG SYNTHETASE)	Not cytoplasm	Not extracellular	plasma membrane	Plasma membrane	CytoplasmicMembrane	0.961465	Rv2881c 7 0 o36-69i81-100o106-126i146-171o177-196i217-236o242-261i	ExpAA=162.07	First60=22.31	PredHel=7	Topology=i38-60o80-102i104-126o149-171i178-200o215-237i242-261o
Rv2903c	PROBABLE SIGNAL PEPTIDASE I LEPB (SPASE I) (LEADER PEPTIDASE I).	Not cytoplasm	Not extracellular	plasma membrane	Cytoplasm	Cytoplasmic	0.830111	Rv2903c 1 0 i68-91o	ExpAA=21.30	First60=0.00	PredHel=1	Topology=i68-87o
Rv2909c	PROBABLE 30S RIBOSOMAL PROTEIN S16 RPSP	cytoplasm	Not extracellular	Not plasma membrane	Cytoplasm	Unknown	0.502349	Rv2909c 0 0 i	ExpAA=0.00	First60=0.00	PredHel=0	Topology=o
Rv2914c	PROBABLE TRANSMEMBRANE SERINE/THREONINE-PROTEIN KINASE I PKNI (PROTEIN KINASE I) (STPK I) (PHOSPHORYLASE B KINASE KINASE) (HYDROXYALKYL-PROTEIN KINASE)	cytoplasm	Not extracellular	Not plasma membrane	Extracell	CytoplasmicMembrane	0.649623	Rv2914c 1 0 i350-370o	ExpAA=32.11	First60=4.31	PredHel=1	Topology=o350-372i
Rv2920c	PROBABLE AMMONIUM-TRANSPORT INTEGRAL MEMBRANE PROTEIN AMT	Not cytoplasm	Not extracellular	plasma membrane	Plasma membrane	CytoplasmicMembrane	0.961741	Rv2920c 11 0 o16-38i45-66o119-142i149-172o192-214i226-246o258-278i290-306o312-332i344-364o393-414i	ExpAA=243.50	First60=38.43	PredHel=11	Topology=o15-37i44-66o119-141i148-170o192-214i227-246o256-278i287-306o310-332i344-363o392-414i
Rv2929	HYPOTHETICAL PROTEIN	Not cytoplasm	Not extracellular	Not plasma membrane	Extracell	Unknown	0.905124	Rv2929 0 0 i	ExpAA=0.00	First60=0.00	PredHel=0	Topology=o
Rv2937	PROBABLE DAUNORUBICIN-DIM-TRANSPORT INTEGRAL MEMBRANE PROTEIN ABC TRANSPORTER DRRB	Not cytoplasm	Not extracellular	plasma membrane	Plasma membrane	CytoplasmicMembrane	0.962622	Rv2937 6 0 i47-69o89-112i133-159o165-187i199-221o267-286i	ExpAA=128.85	First60=13.92	PredHel=6	Topology=i47-69o89-111i137-159o164-186i199-221o263-285i
Rv2938	PROBABLE DAUNORUBICIN-DIM-TRANSPORT INTEGRAL MEMBRANE PROTEIN ABC TRANSPORTER DRRC	Not cytoplasm	Not extracellular	plasma membrane	Plasma membrane	CytoplasmicMembrane	0.954477	Rv2938 8 0 i45-66o78-100i112-131o137-154i161-185o197-215i227-245o251-270i	ExpAA=135.11	First60=15.38	PredHel=6	Topology=i45-67o77-99i130-152o162-184i197-219o248-270i
Rv2942	CONSERVED TRANSMEMBRANE TRANSPORT PROTEIN MMPL7	Not cytoplasm	Not extracellular	plasma membrane	Plasma membrane	CytoplasmicMembrane	0.839363	Rv2942 12 0 i44-63o212-231i238-259o271-293i313-330o342-366i387-411o761-782i789-810o822-844i865-884o890-913i	ExpAA=265.84	First60=17.62	PredHel=12	Topology=i44-66o210-232i239-261o271-293i310-332o342-364i385-407o760-782i789-811o821-843i864-886o891-913i
Rv2945c	PROBABLE CONSERVED LIPOPROTEIN LPPX	Not cytoplasm	Not extracellular	plasma membrane	Cytoplasm	CytoplasmicMembrane	0.913028	Rv2945c 0 Y n7-22c27/28o	ExpAA=18.01	First60=18.00	PredHel=1	Topology=i7-24o	*		*
Rv2957	POSSIBLE GLYCOSYL TRANSFERASE	cytoplasm	Not extracellular	Not plasma membrane	Cytoplasm	Unknown	0.622047	Rv2957 1 0 i21-40o	ExpAA=19.46	First60=18.89	PredHel=1	Topology=o20-42i
Rv2963	PROBABLE INTEGRAL MEMBRANE	Not cytoplasm	Not extracellular	plasma membrane	Plasma membrane	CytoplasmicMembrane	0.95445	Rv2963 9 Y n10-18c23/24o33-50i98-123o129-150i190-208o214-233i245-268o274-298i310-335o355-376i	ExpAA=205.71	First60=26.31	PredHel=9	Topology=i32-51o66-88i101-123o127-149i207-229o244-266i273-295o310-332i353-375o
Rv2968c	PROBABLE CONSERVED INTEGRAL MEMBRANE PROTEIN	Not cytoplasm	Not extracellular	plasma membrane	Plasma membrane	CytoplasmicMembrane	0.955608	Rv2968c 6 0 o22-40i52-71o83-101i108-129o135-161i182-203o	ExpAA=108.51	First60=22.21	PredHel=5	Topology=i20-42o78-100i107-129o144-163i184-203o
Rv2969c	POSSIBLE CONSERVED MEMBRANE OR SECRETED PROTEIN	Not cytoplasm	Not extracellular	plasma membrane	Cytoplasm	Cytoplasmic	0.656119	Rv2969c 1 0 o20-44i	ExpAA=22.69	First60=22.63	PredHel=1	Topology=o20-42i
Rv2972c	POSSIBLE CONSERVED MEMBRANE OR EXPORTED PROTEIN	No Prediction	No Prediction	No Prediction	Extracell	Unknown	0.785677	Rv2972c 0 Y n5-15c20/21o	ExpAA=28.03	First60=27.97	PredHel=1	Topology=i7-29o	*
Rv2980	POSSIBLE CONSERVED SECRETED PROTEIN	Not cytoplasm	Not extracellular	plasma membrane	Cytoplasm	Unknown	0.87846	Rv2980 1 0 o12-32i	ExpAA=22.33	First60=22.27	PredHel=1	Topology=o10-32i	*
Rv2994	PROBABLE CONSERVED INTEGRAL MEMBRANE PROTEIN	Not cytoplasm	Not extracellular	plasma membrane	Plasma membrane	CytoplasmicMembrane	0.939907	Rv2994 10 0 i12-36o48-72i79-96o102-123i144-161o167-188i218-239o245-267i279-298o371-391i	ExpAA=190.98	First60=34.04	PredHel=8	Topology=i13-35o50-72i93-115o166-188i217-239o249-268i281-298o369-391i
Rv3004	LOW MOLECULAR WEIGHT PROTEIN ANTIGEN 6 (CFP-6)	Not cytoplasm	extracellular	Not plasma membrane	Cytoplasm	Extracellular	0.783858	Rv3004 0 Y n4-15c19/20o	ExpAA=23.80	First60=23.79	PredHel=1	Topology=o15-37i	*
Rv3005c	CONSERVED HYPOTHETICAL PROTEIN	Not cytoplasm	Not extracellular	plasma membrane	Extracell	CytoplasmicMembrane	0.947968	Rv3005c 4 0 i113-131o170-198i219-239o251-272i	ExpAA=102.74	First60=0.00	PredHel=4	Topology=i113-132o170-201i221-240o250-272i
Rv3006	PROBABLE CONSERVED LIPOPROTEIN LPPZ	Not cytoplasm	Not extracellular	Not plasma membrane	Extracell	Unknown	0.763354	Rv3006 0 Y n10-20c25/26o	ExpAA=1.42	First60=1.38	PredHel=0	Topology=o	*
Rv3019c	SECRETED ESAT-6 LIKE PROTEIN ESXR (TB10.3) (ESAT-6 LIKE PROTEIN 9)	Not cytoplasm	extracellular	Not plasma membrane	Extracell	Unknown	0.706399	Rv3019c 0 0 i	ExpAA=0.06	First60=0.06	PredHel=0	Topology=o
Rv3035	CONSERVED HYPOTHETICAL PROTEIN	Not cytoplasm	Not extracellular	plasma membrane	Extracell	Unknown	0.568608	Rv3035 0 0 i	ExpAA=0.06	First60=0.02	PredHel=0	Topology=o
Rv3036c	PROBABLE CONSERVED SECRETED PROTEIN TB22.2	Not cytoplasm	extracellular	Not plasma membrane	Extracell	Extracellular	0.643953	Rv3036c 0 Y n4-15c22/23o	ExpAA=15.20	First60=15.15	PredHel=0	Topology=o	*
Rv3043c	PROBABLE CYTOCHROME C OXIDASE POLYPEPTIDE I CTAD (CYTOCHROME AA3 SUBUNIT 1)	Not cytoplasm	Not extracellular	plasma membrane	Plasma membrane	CytoplasmicMembrane	0.96729	Rv3043c 12 0 i40-62o82-109i121-141o170-196i208-234o254-278i290-311o317-339i360-380o400-418i430-452o472-493i	ExpAA=270.58	First60=20.97	PredHel=12	Topology=i40-62o82-104i124-146o172-194i214-236o256-278i290-312o316-338i359-381o396-418i431-453o473-495i
Rv3050c	PROBABLE TRANSCRIPTIONAL REGULATORY PROTEIN (PROBABLY ASNC-FAMILY)	cytoplasm	Not extracellular	Not plasma membrane	Cytoplasm	Cytoplasmic	0.637508	Rv3050c 1 0 i206-229o	ExpAA=22.79	First60=0.00	PredHel=1	Topology=i206-228o
Rv3063	PROBABLE CARBON STARVATION PROTEIN A HOMOLOG CSTA	Not cytoplasm	Not extracellular	plasma membrane	Plasma membrane	CytoplasmicMembrane	0.953943	Rv3063 16 0 i43-62o68-88i128-147o153-175i196-218o224-244i256-275o281-311i323-340o360-386i398-421o503-521i554	ExpAA=344.75	First60=17.95	PredHel=16	Topology=i43-62o67-89i122-144o154-173i194-216o226-248i255-274o289-311i318-340o355-377i398-420o503-525i555-574o584-606i613-635o685-707i
Rv3064c	PROBABLE CONSERVED INTEGRAL MEMBRANE PROTEIN	Not cytoplasm	Not extracellular	plasma membrane	Plasma membrane	CytoplasmicMembrane	0.97612	Rv3064c 3 Y n9-20c25/26o49-69i76-93o113-133i	ExpAA=86.68	First60=31.35	PredHel=4	Topology=i20-42o52-74i79-101o111-133i
Rv3065	MULTIDRUGS-TRANSPORT INTEGRAL MEMBRANE PROTEIN MMR	Not cytoplasm	Not extracellular	plasma membrane	Plasma membrane	CytoplasmicMembrane	0.977877	Rv3065 3 Y n4-11c16/17o26-48i60-79o85-104i	ExpAA=82.29	First60=41.49	PredHel=4	Topology=i2-19o29-51i58-80o84-106i
Rv3067	CONSERVED HYPOTHETICAL PROTEIN	cytoplasm	Not extracellular	Not plasma membrane	Extracell	Unknown	0.579425	Rv3067 0 Y n4-15c20/21o	ExpAA=10.34	First60=10.33	PredHel=0	Topology=o	*
Rv3069	PROBABLE CONSERVED TRANSMEMBRANE PROTEIN	Not cytoplasm	Not extracellular	plasma membrane	Plasma membrane	CytoplasmicMembrane	0.979649	Rv3069 3 Y n9-22c30/31o40-60i72-89o101-125i	ExpAA=84.85	First60=42.39	PredHel=4	Topology=i9-31o35-57i70-92o102-124i	*	*
Rv3070	PROBABLE CONSERVED INTEGRAL MEMBRANE PROTEIN	Not cytoplasm	Not extracellular	plasma membrane	Plasma membrane	CytoplasmicMembrane	0.975208	Rv3070 4 0 o6-29i41-62o68-88i100-124o	ExpAA=88.08	First60=40.80	PredHel=4	Topology=o10-29i41-63o68-90i102-124o
Rv3073c	CONSERVED HYPOTHETICAL PROTEIN	cytoplasm	Not extracellular	Not plasma membrane	Cytoplasm	Cytoplasmic	0.540775	Rv3073c 0 0 i	ExpAA=0.00	First60=0.00	PredHel=0	Topology=i
Rv3078	PROBABLE HYDROXYLAMINOBENZENE MUTASE HAB	Not cytoplasm	Not extracellular	plasma membrane	Plasma membrane	CytoplasmicMembrane	0.972257	Rv3078 4 0 o6-27i39-56o62-89i110-131o	ExpAA=88.36	First60=42.29	PredHel=4	Topology=o4-26i39-56o66-88i109-131o	*
Rv3090	HYPOTHETICAL ALANINE AND VALINE RICH PROTEIN	No Prediction	No Prediction	No Prediction	Cytoplasm	Unknown	0.678429	Rv3090 2 0 o6-24i36-57o	ExpAA=42.75	First60=42.63	PredHel=2	Topology=o5-24i37-59o	*
Rv3092c	PROBABLE CONSERVED INTEGRAL MEMBRANE PROTEIN	Not cytoplasm	Not extracellular	plasma membrane	Plasma membrane	CytoplasmicMembrane	0.775084	Rv3092c 4 0 i76-94o165-187i208-233o271-298i	ExpAA=93.12	First60=1.16	PredHel=4	Topology=i76-98o165-187i218-240o276-298i
Rv3101c	PUTATIVE CELL DIVISION PROTEIN FTSX (SEPTATION COMPONENT-TRANSPORT INTEGRAL MEMBRANE PROTEIN ABC TRANSPORTER)	Not cytoplasm	Not extracellular	plasma membrane	Plasma membrane	CytoplasmicMembrane	0.881218	Rv3101c 4 0 i21-45o172-197i218-246o266-291i	ExpAA=91.22	First60=22.84	PredHel=4	Topology=o20-42i174-196o225-247i268-290o	*
Rv3103c	HYPOTHETICAL PROLINE-RICH PROTEIN	Not cytoplasm	extracellular	Not plasma membrane	Extracell	Unknown	0.97122	Rv3103c 1 0 i12-36o	ExpAA=22.27	First60=22.27	PredHel=1	Topology=i13-35o
Rv3104c	POSSIBLE CONSERVED TRANSMEMBRANE PROTEIN	Not cytoplasm	Not extracellular	plasma membrane	Plasma membrane	CytoplasmicMembrane	0.69331	Rv3104c 3 0 o35-53i81-100o106-126i	ExpAA=63.25	First60=20.93	PredHel=3	Topology=o27-49i81-100o105-127i
Rv3117	PROBABLE THIOSULFATE SULFURTRANSFERASE CYSA3 (RHODANESE-LIKE PROTEIN) (THIOSULFATE CYANIDE TRANSSULFURASE) (THIOSULFATE THIOTRANSFERASE)	cytoplasm	Not extracellular	Not plasma membrane	Cytoplasm	Cytoplasmic	0.699982	Rv3117 0 0 i	ExpAA=0.32	First60=0.00	PredHel=0	Topology=o
Rv3145	PROBABLE NADH DEHYDROGENASE I (CHAIN A) NUOA (NADH-UBIQUINONE OXIDOREDUCTASE CHAIN A)	Not cytoplasm	Not extracellular	plasma membrane	Plasma membrane	CytoplasmicMembrane	0.968971	Rv3145 3 0 o6-28i70-91o97-119i	ExpAA=67.85	First60=23.04	PredHel=3	Topology=o5-27i70-92o97-119i	*
Rv3152	PROBABLE NADH DEHYDROGENASE I (CHAIN H) NUOH (NADH-UBIQUINONE OXIDOREDUCTASE CHAIN H)	Not cytoplasm	Not extracellular	plasma membrane	Plasma membrane	CytoplasmicMembrane	0.965756	Rv3152 9 0 o12-33i79-99o119-139i160-181o193-212i249-270o282-303i315-339o345-367i	ExpAA=198.84	First60=22.97	PredHel=9	Topology=o10-32i79-101o121-143i160-182o192-211i249-271o281-303i315-337o347-367i
Rv3154	PROBABLE NADH DEHYDROGENASE	Not cytoplasm	Not extracellular	plasma membrane	Plasma membrane	CytoplasmicMembrane	0.933127	Rv3154 5 0 o20-39i46-66o72-95i107-128o155-177i	ExpAA=109.40	First60=40.13	PredHel=5	Topology=o15-37i39-61o65-87i107-129o155-177i
Rv3155	PROBABLE NADH DEHYDROGENASE I (CHAIN K) NUOK (NADH-UBIQUINONE OXIDOREDUCTASE CHAIN K)	Not cytoplasm	Not extracellular	plasma membrane	Plasma membrane	CytoplasmicMembrane	0.972061	Rv3155 3 0 o6-23i28-48o60-83i	ExpAA=62.91	First60=41.77	PredHel=3	Topology=o4-23i28-50o60-82i
Rv3156	PROBABLE NADH DEHYDROGENASE I (CHAIN L) NUOL (NADH-UBIQUINONE OXIDOREDUCTASE CHAIN L)	Not cytoplasm	Not extracellular	plasma membrane	Plasma membrane	CytoplasmicMembrane	0.967631	Rv3156 16 0 o6-26i33-55o90-111i123-140o146-165i186-207o213-232i253-271o283-304i316-339o345-362i374-399o419	ExpAA=346.50	First60=43.46	PredHel=16	Topology=o4-26i33-55o88-110i123-140o144-166i186-208o213-232i253-272o282-304i311-333o337-359i371-393o421-443i463-485o505-527i608-630o
Rv3157	PROBABLE NADH DEHYDROGENASE I (CHAIN M) NUOK (NADH-UBIQUINONE OXIDOREDUCTASE CHAIN M)	Not cytoplasm	Not extracellular	plasma membrane	Plasma membrane	CytoplasmicMembrane	0.968986	Rv3157 14 0 o6-24i31-52o72-100i140-159o165-185i197-218o246-265i285-307o313-335i342-361o373-391i411-434o446	ExpAA=302.27	First60=41.94	PredHel=14	Topology=o5-24i31-53o83-105i140-159o163-185i197-219o246-268i281-303o313-335i342-364o369-391i411-433o443-465i486-508o	*
Rv3158	PROBABLE NADH DEHYDROGENASE I (CHAIN N) NUON (NADH-UBIQUINONE OXIDOREDUCTASE CHAIN N)	Not cytoplasm	Not extracellular	plasma membrane	Plasma membrane	CytoplasmicMembrane	0.969327	Rv3158 13 0 o12-33i45-64o84-101i152-169o175-195i207-229o249-273i285-306o318-337i344-362o368-392i418-440o452	ExpAA=294.86	First60=42.61	PredHel=14	Topology=o10-32i39-61o76-98i151-168o172-194i207-229o249-271i284-306o316-338i345-362o372-394i418-440o450-472i493-515o	*
Rv3159c	PPE FAMILY PROTEIN	Not cytoplasm	Not extracellular	plasma membrane	Extracell	Extracellular	0.849617	Rv3159c 0 0 i	ExpAA=3.17	First60=1.20	PredHel=0	Topology=o	*
Rv3162c	POSSIBLE INTEGRAL MEMBRANE PROTEIN	Not cytoplasm	Not extracellular	plasma membrane	Extracell	CytoplasmicMembrane	0.975649	Rv3162c 5 0 o15-40i47-66o72-91i98-117o123-139i	ExpAA=102.70	First60=37.83	PredHel=5	Topology=o15-37i44-66o70-87i94-116o121-140i	*	*
Rv3165c	HYPOTHETICAL PROTEIN	cytoplasm	Not extracellular	plasma membrane	Cytoplasm	Unknown	0.89366	Rv3165c 1 Y n4-15c19/20o29-47i	ExpAA=34.94	First60=34.94	PredHel=2	Topology=i5-22o26-43i
Rv3166c	CONSERVED HYPOTHETICAL PROTEIN	Not cytoplasm	Not extracellular	plasma membrane	Plasma membrane	CytoplasmicMembrane	0.893843	Rv3166c 4 0 i12-29o49-70i101-124o161-182i	ExpAA=88.68	First60=33.38	PredHel=4	Topology=i12-34o49-71i101-123o161-183i	*
Rv3193c	PROBABLE CONSERVED TRANSMEMBRANE PROTEIN	Not cytoplasm	Not extracellular	plasma membrane	Cytoplasm	CytoplasmicMembrane	0.765685	Rv3193c 6 Y n18-31c39/40o63-85i111-134o170-192i212-229o260-279i286-306o	ExpAA=152.53	First60=22.39	PredHel=7	Topology=i17-39o59-81i113-135o169-191i212-229o255-277i284-306o	*
Rv3207c	CONSERVED HYPOTHETICAL PROTEIN	cytoplasm	Not extracellular	Not plasma membrane	Extracell	Unknown	0.858236	Rv3207c 1 0 o6-23i	ExpAA=19.22	First60=19.21	PredHel=1	Topology=i5-27o	*
Rv3209	CONSERVED HYPOTHETICAL THREONIN AND PROLINE RICH PROTEIN	Not cytoplasm	extracellular	plasma membrane	Extracell	Unknown	0.786379	Rv3209 0 Y n2-12c22/23o	ExpAA=0.03	First60=0.00	PredHel=0	Topology=o
Rv3217c	PROBABLE CONSERVED INTEGRAL MEMBRANE PROTEIN	Not cytoplasm	Not extracellular	plasma membrane	Plasma membrane	CytoplasmicMembrane	0.96811	Rv3217c 4 0 i12-36o48-68i75-93o99-117i	ExpAA=86.88	First60=38.06	PredHel=4	Topology=i13-32o42-64i71-93o99-121i	*
Rv3219	PROBABLE TRANSCRIPTIONAL REGULATORY PROTEIN WHIB-LIKE WHIB1	No Prediction	No Prediction	No Prediction	Cytoplasm	Unknown	0.646807	Rv3219 0 0 i	ExpAA=0.00	First60=0.00	PredHel=0	Topology=i
Rv3236c	PROBABLE CONSERVED INTEGRAL MEMBRANE TRANSPORT PROTEIN	Not cytoplasm	Not extracellular	plasma membrane	Plasma membrane	CytoplasmicMembrane	0.961515	Rv3236c 11 0 o6-24i36-54o60-78i90-111o117-137i149-172o178-198i218-251o290-312i324-345o351-370i	ExpAA=217.10	First60=45.35	PredHel=10	Topology=i7-29o33-55i57-79o115-137i150-172o176-198i219-241o291-313i334-356o360-382i	*
Rv3238c	PROBABLE CONSERVED INTEGRAL MEMBRANE PROTEIN	Not cytoplasm	Not extracellular	plasma membrane	Plasma membrane	CytoplasmicMembrane	0.95693	Rv3238c 6 0 i7-29o41-65i86-103o123-148i169-188o194-213i	ExpAA=114.96	First60=42.82	PredHel=5	Topology=i7-29o39-61i82-104o124-146i180-202o
Rv3239c	PROBABLE CONSERVED TRANSMEMBRANE TRANSPORT PROTEIN	Not cytoplasm	Not extracellular	plasma membrane	Cytoplasm	CytoplasmicMembrane	0.889718	Rv3239c 14 0 i25-47o59-80i92-111o117-139i151-172o178-195i216-232o238-259i280-304o316-338i345-362o374-399i420	ExpAA=309.62	First60=23.37	PredHel=15	Topology=i25-47o62-84i91-113o117-139i151-173o177-194i214-232o237-259i279-301o316-338i345-362o377-399i411-433o448-467i819-841o		*
Rv3250c	PROBABLE RUBREDOXIN RUBB	cytoplasm	Not extracellular	Not plasma membrane	Cytoplasm	Cytoplasmic	0.838451	Rv3250c 0 0 i	ExpAA=0.00	First60=0.00	PredHel=0	Topology=i
Rv3251c	PROBABLE RUBREDOXIN RUBA	cytoplasm	Not extracellular	Not plasma membrane	Cytoplasm	Cytoplasmic	0.855079	Rv3251c 0 0 i	ExpAA=0.00	First60=0.00	PredHel=0	Topology=i
Rv3252c	PROBABLE TRANSMEMBRANE ALKANE 1-MONOOXYGENASE ALKB (ALKANE 1-HYDROXYLASE) (LAURIC ACID OMEGA-HYDROXYLASE) (OMEGA-HYDROXYLASE) (FATTY ACID OMEGA-HYDROXYLASE) (ALKANE HYDROXYLASE-RUBREDOXIN)	Not cytoplasm	Not extracellular	plasma membrane	Cytoplasm	CytoplasmicMembrane	0.952538	Rv3252c 6 0 i27-47o53-73i103-124o136-157i255-274o280-298i	ExpAA=130.08	First60=27.45	PredHel=6	Topology=i27-49o54-76i103-125o135-157i255-277o281-303i
Rv3253c	POSSIBLE CATIONIC AMINO ACID TRANSPORT INTEGRAL MEMBRANE PROTEIN	Not cytoplasm	Not extracellular	plasma membrane	Plasma membrane	CytoplasmicMembrane	0.9642	Rv3253c 12 0 i33-55o61-83i104-128o148-168i175-198o235-254i275-302o322-353i374-394o400-419i431-451o457-475i	ExpAA=261.26	First60=22.51	PredHel=12	Topology=i30-52o62-84i104-126o146-168i175-197o235-254i275-297o325-347i373-395o400-419i432-451o456-475i
Rv3271c	PROBABLE CONSERVED INTEGRAL MEMBRANE PROTEIN	Not cytoplasm	Not extracellular	plasma membrane	Plasma membrane	CytoplasmicMembrane	0.935715	Rv3271c 6 0 i34-55o61-81i101-117o129-149i170-188o194-212i	ExpAA=116.18	First60=22.84	PredHel=4	Topology=i34-56o130-149i170-189o193-212i
Rv3273	PROBABLE TRANSMEMBRANE CARBONIC ANHYDRASE (CARBONATE DEHYDRATASE) (CARBONIC DEHYDRATASE)	Not cytoplasm	Not extracellular	plasma membrane	Plasma membrane	CytoplasmicMembrane	0.836308	Rv3273 11 0 o35-54i61-82o102-123i130-157o177-198i210-227o261-286i307-328o340-358i365-387o393-424i	ExpAA=229.42	First60=21.75	PredHel=10	Topology=o36-58i60-82o102-124i129-151o205-227i264-286o306-328i341-360o364-386i393-424o
Rv3277	PROBABLE CONSERVED TRANSMEMBRANE PROTEIN	Not cytoplasm	Not extracellular	plasma membrane	Plasma membrane	CytoplasmicMembrane	0.90649	Rv3277 5 0 o33-53i74-93o105-122i142-162o182-200i	ExpAA=90.38	First60=6.40	PredHel=4	Topology=i77-95o105-122i142-164o179-201i
Rv3278c	PROBABLE CONSERVED TRANSMEMBRANE PROTEIN	Not cytoplasm	extracellular	plasma membrane	Cytoplasm	Cytoplasmic	0.910548	Rv3278c 2 0 o25-46i58-80o	ExpAA=45.11	First60=23.87	PredHel=2	Topology=i24-46o61-83i
Rv3281	CONSERVED HYPOTHETICAL PROTEIN	Not cytoplasm	Not extracellular	Not plasma membrane	Extracell	Unknown	0.946502	Rv3281 0 0 i	ExpAA=0.00	First60=0.00	PredHel=0	Topology=o
Rv3288c	PUTATIVE PROTEIN USFY	No Prediction	No Prediction	No Prediction	Cytoplasm	Cytoplasmic	0.936149	Rv3288c 2 0 i66-86o92-111i	ExpAA=42.83	First60=0.45	PredHel=2	Topology=i60-82o92-111i
Rv3289c	POSSIBLE TRANSMEMBRANE PROTEIN	Not cytoplasm	Not extracellular	Not plasma membrane	Plasma membrane	CytoplasmicMembrane	0.968871	Rv3289c 3 0 o23-50i62-81o101-124i	ExpAA=66.72	First60=23.33	PredHel=3	Topology=i22-44o59-81i93-115o
Rv3310	ACID PHOSPHATASE (ACID PHOSPHOMONOESTERASE) (PHOSPHOMONOESTERASE) (GLYCEROPHOSPHATASE)	Not cytoplasm	extracellular	Not plasma membrane	Extracell	CytoplasmicMembrane	0.859864	Rv3310 0 Y n18-31c43/44o	ExpAA=23.21	First60=22.98	PredHel=1	Topology=i21-43o	*
Rv3316	PROBABLE SUCCINATE DEHYDROGENASE (CYTOCHROME B-556 SUBUNIT) SDHC (SUCCINIC DEHYDROGENASE) (FUMARATE REDUCTASE) (FUMARATE DEHYDROGENASE) (FUMARIC HYDROGENASE)	Not cytoplasm	Not extracellular	plasma membrane	Plasma membrane	CytoplasmicMembrane	0.968604	Rv3316 2 Y n9-20c25/26o49-71i83-108o	ExpAA=65.79	First60=33.67	PredHel=3	Topology=i9-28o48-70i83-105o
Rv3317	PROBABLE SUCCINATE DEHYDROGENASE (HYDROPHOBIC MEMBRANE ANCHOR SUBUNIT) SDHD (SUCCINIC DEHYDROGENASE) (FUMARATE REDUCTASE) (FUMARATE DEHYDROGENASE) (FUMARIC HYDROGENASE)	Not cytoplasm	Not extracellular	plasma membrane	Plasma membrane	CytoplasmicMembrane	0.967234	Rv3317 3 0 i34-56o76-94i115-137o	ExpAA=60.96	First60=22.42	PredHel=3	Topology=i38-60o80-102i115-137o
Rv3331	PROBABLE CONSERVED INTEGRAL MEMBRANE PROTEIN	Not cytoplasm	Not extracellular	plasma membrane	Plasma membrane	CytoplasmicMembrane	0.966234	Rv3331 12 0 i51-80o92-114i121-139o145-167i179-200o206-225i287-308o320-345i352-373o385-408i429-446o452-470i	ExpAA=267.20	First60=9.01	PredHel=12	Topology=i51-73o93-115i120-139o144-166i179-201o206-225i286-308o323-345i352-374o384-406i419-441o445-467i
Rv3335c	PROBABLE CONSERVED INTEGRAL MEMBRANE PROTEIN	Not cytoplasm	Not extracellular	plasma membrane	Plasma membrane	CytoplasmicMembrane	0.936133	Rv3335c 6 0 o42-65i103-122o149-171i192-214o220-240i260-285o	ExpAA=131.49	First60=19.70	PredHel=6	Topology=o43-65i105-124o149-171i192-214o229-251i263-285o
Rv3343c	PPE FAMILY PROTEIN	Not cytoplasm	Not extracellular	plasma membrane	Extracell	CytoplasmicMembrane	0.557414	Rv3343c 0 0 i	ExpAA=10.19	First60=4.29	PredHel=0	Topology=o
Rv3344c	PE-PGRS FAMILY PROTEIN	Not cytoplasm	Not extracellular	Not plasma membrane	Extracell	Extracellular	0.947656	Rv3344c 0 0 i	ExpAA=0.01	First60=0.00	PredHel=0	Topology=o		*
Rv3345c	PE-PGRS FAMILY PROTEIN	Not cytoplasm	Not extracellular	Not plasma membrane	Extracell	Extracellular	0.90966	Rv3345c 0 Y n11-22c31/32o	ExpAA=0.20	First60=0.10	PredHel=0	Topology=o	*
Rv3346c	CONSERVED TRANSMEMBRANE PROTEIN	No Prediction	No Prediction	No Prediction	Plasma membrane	Unknown	0.917785	Rv3346c 2 0 o23-45i57-76o	ExpAA=39.40	First60=22.58	PredHel=2	Topology=i23-45o60-79i
Rv3347c	PPE FAMILY PROTEIN	Not cytoplasm	Not extracellular	plasma membrane	Extracell	CytoplasmicMembrane	0.650245	Rv3347c 0 0 i	ExpAA=38.84	First60=10.00	PredHel=0	Topology=o
Rv3350c	PPE FAMILY PROTEIN	Not cytoplasm	Not extracellular	plasma membrane	Extracell	CytoplasmicMembrane	0.639262	Rv3350c 0 0 i	ExpAA=23.98	First60=4.54	PredHel=0	Topology=o
Rv3354	CONSERVED HYPOTHETICAL PROTEIN	Not cytoplasm	Not extracellular	plasma membrane	Extracell	CytoplasmicMembrane	0.606914	Rv3354 0 Y n13-24c32/33o	ExpAA=20.27	First60=17.45	PredHel=1	Topology=i13-35o	*	*
Rv3355c	Probable integral membrane protein	Not cytoplasm	Not extracellular	plasma membrane	Plasma membrane	CytoplasmicMembrane	0.967233	Rv3355c 3 0 i12-33o39-57i69-88o	ExpAA=61.95	First60=41.62	PredHel=3	Topology=i13-35o39-58i71-90o
Rv3367	PE-PGRS FAMILY PROTEIN	Not cytoplasm	Not extracellular	plasma membrane	Extracell	Extracellular	0.923559	Rv3367 0 Y n4-15c33/34o	ExpAA=0.41	First60=0.36	PredHel=0	Topology=o	*
Rv3388	PE-PGRS FAMILY PROTEIN	Not cytoplasm	Not extracellular	Not plasma membrane	Extracell	Extracellular	0.859663	Rv3388 0 Y n11-21c33/34o	ExpAA=0.25	First60=0.20	PredHel=0	Topology=o	*
Rv3390	PROBABLE CONSERVED LIPOPROTEIN LPQD	Not cytoplasm	Not extracellular	Not plasma membrane	Extracell	CytoplasmicMembrane	0.700664	Rv3390 0 Y n10-23c27/28o	ExpAA=19.24	First60=18.87	PredHel=1	Topology=i13-32o	*		*
Rv3413c	Rv3413c	Not cytoplasm	Not extracellular	plasma membrane	Extracell	Unknown	0.870908	Rv3413c 1 0 i86-107o	ExpAA=21.98	First60=0.00	PredHel=1	Topology=i85-107o
Rv3418c	10 KDA CHAPERONIN GROES (PROTEIN CPN10) (PROTEIN GROES) (BCG-A HEAT SHOCK PROTEIN) (10 KDA ANTIGEN)	cytoplasm	Not extracellular	Not plasma membrane	Cytoplasm	Cytoplasmic	0.680232	Rv3418c 0 0 i	ExpAA=0.00	First60=0.00	PredHel=0	Topology=o
Rv3434c	POSSIBLE CONSERVED TRANSMEMBRANE PROTEIN	Not cytoplasm	Not extracellular	plasma membrane	Cytoplasm	CytoplasmicMembrane	0.953953	Rv3434c 6 0 o20-40i83-101o107-129i141-161o167-184i191-210o	ExpAA=103.68	First60=22.48	PredHel=5	Topology=o15-37i107-129o144-162i167-184o189-208i
Rv3435c	PROBABLE CONSERVED TRANSMEMBRANE PROTEIN	Not cytoplasm	extracellular	Not plasma membrane	Cytoplasm	CytoplasmicMembrane	0.897694	Rv3435c 4 0 i7-25o186-208i220-239o245-274i	ExpAA=84.11	First60=21.56	PredHel=4	Topology=i7-29o186-208i221-239o254-276i
Rv3437	POSSIBLE CONSERVED TRANSMEMBRANE PROTEIN	cytoplasm	Not extracellular	Not plasma membrane	Extracell	Unknown	0.931062	Rv3437 1 0 o75-92i	ExpAA=21.65	First60=0.00	PredHel=1	Topology=o73-95i
Rv3448	PROBABLE CONSERVED INTEGRAL MEMBRANE PROTEIN	Not cytoplasm	Not extracellular	plasma membrane	Plasma membrane	CytoplasmicMembrane	0.963716	Rv3448 11 0 i120-142o154-172i179-200o206-224i231-255o261-286i317-338o344-363i375-393o399-424i436-459o	ExpAA=237.20	First60=3.00	PredHel=11	Topology=i120-142o152-171i178-200o205-227i234-256o260-282i317-339o349-366i373-392o402-424i436-458o
Rv3449	PROBABLE MEMBRANE-ANCHORED MYCOSIN MYCP4 (SERINE PROTEASE) (SUBTILISIN-LIKE PROTEASE) (SUBTILASE-LIKE) (MYCOSIN-4)	Not cytoplasm	extracellular	Not plasma membrane	Plasma membrane	Extracellular	0.512987	Rv3449 1 Y n9-20c28/29o419-439i	ExpAA=40.36	First60=15.70	PredHel=2	Topology=i7-29o419-441i	*
Rv3451	PROBABLE CUTINASE PRECURSOR CUT3	Not cytoplasm	extracellular	Not plasma membrane	Extracell	Unknown	0.633573	Rv3451 0 Y n3-21c26/27o	ExpAA=22.84	First60=21.16	PredHel=1	Topology=i2-24o	*
Rv3452	PROBABLE CUTINASE PRECURSOR CUT4	Not cytoplasm	extracellular	Not plasma membrane	Extracell	Unknown	0.554841	Rv3452 0 Y n20-35c45/46o	ExpAA=19.43	First60=19.16	PredHel=1	Topology=i20-39o	*	*
Rv3453	POSSIBLE CONSERVED TRANSMEMBRANE PROTEIN	Not cytoplasm	Not extracellular	Not plasma membrane	Cytoplasm	Unknown	0.945967	Rv3453 2 0 o41-63i75-98o	ExpAA=45.07	First60=17.06	PredHel=2	Topology=o46-68i75-97o
Rv3454	PROBABLE CONSERVED INTEGRAL MEMBRANE PROTEIN	Not cytoplasm	Not extracellular	plasma membrane	Plasma membrane	CytoplasmicMembrane	0.970754	Rv3454 9 0 o12-31i38-59o79-100i120-150o170-190i222-240o246-268i289-314o320-339i	ExpAA=199.75	First60=41.87	PredHel=10	Topology=i7-29o39-58i78-100o120-135i140-159o169-191i222-241o256-275i288-310o320-339i
Rv3467	CONSERVED HYPOTHETICAL PROTEIN	Not cytoplasm	Not extracellular	Not plasma membrane	Extracell	Unknown	0.788522	Rv3467 0 0 i	ExpAA=0.01	First60=0.00	PredHel=0	Topology=o
Rv3476c	PROBABLE DICARBOXYLIC ACID TRANSPORT INTEGRAL MEMBRANE PROTEIN KGTP (DICARBOXYLATE TRANSPORTER)	Not cytoplasm	Not extracellular	plasma membrane	Plasma membrane	CytoplasmicMembrane	0.969428	Rv3476c 11 0 o61-81i93-111o117-141i162-187o193-212i249-267o287-304i316-336o342-365i377-398o410-429i	ExpAA=240.61	First60=7.93	PredHel=11	Topology=o60-82i94-113o118-140i161-183o193-212i249-271o286-308i315-333o343-365i378-397o407-429i
Rv3481c	PROBABLE INTEGRAL MEMBRANE PROTEIN	Not cytoplasm	Not extracellular	Not plasma membrane	Plasma membrane	CytoplasmicMembrane	0.967101	Rv3481c 6 0 o12-37i49-73o85-104i125-151o163-186i207-226o	ExpAA=139.92	First60=34.90	PredHel=6	Topology=o15-37i50-72o82-104i131-153o163-185i206-228o	*
Rv3482c	PROBABLE CONSERVED MEMBRANE PROTE	Not cytoplasm	extracellular	Not plasma membrane	Cytoplasm	Unknown	0.855524	Rv3482c 1 0 i64-85o	ExpAA=22.67	First60=0.03	PredHel=1	Topology=i63-85o
Rv3483c	POSSIBLE EXPORTED PROTEIN	Not cytoplasm	Not extracellular	plasma membrane	Extracell	Unknown	0.95651	Rv3483c 1 0 o34-54i	ExpAA=22.47	First60=22.44	PredHel=1	Topology=o31-53i
Rv3488	CONSERVED HYPOTHETICAL PROTEIN	cytoplasm	Not extracellular	Not plasma membrane	Cytoplasm	Unknown	0.525456	Rv3488 0 0 i	ExpAA=0.00	First60=0.00	PredHel=0	Topology=i
Rv3491	CONSERVED HYPOTHETICAL MCE ASSOCIATED ALANINE AND VALINE RICH PROTEIN	No Prediction	No Prediction	No Prediction	Extracell	Unknown	0.918184	Rv3491 0 Y n5-23c31/32o	ExpAA=18.79	First60=18.47	PredHel=1	Topology=i7-26o	*
Rv3493c	CONSERVED HYPOTHETICAL MCE ASSOCIATED ALANINE AND VALINE RICH PROTEIN	cytoplasm	Not extracellular	Not plasma membrane	Plasma membrane	Unknown	0.590562	Rv3493c 1 0 o76-100i	ExpAA=22.67	First60=0.00	PredHel=1	Topology=i75-97o		*
Rv3494c	MCE-FAMILY PROTEIN MCE4F	Not cytoplasm	extracellular	Not plasma membrane	Extracell	CytoplasmicMembrane	0.688476	Rv3494c 1 0 i12-31o	ExpAA=32.71	First60=26.54	PredHel=1	Topology=i12-34o	*
Rv3499c	MCE-FAMILY PROTEIN MCE4A	Not cytoplasm	Not extracellular	plasma membrane	Cytoplasm	Unknown	0.66147	Rv3499c 1 0 i12-33o	ExpAA=22.17	First60=22.15	PredHel=1	Topology=i13-35o	*	*
Rv3500c	CONSERVED HYPOTHETICAL INTEGRAL MEMBRANE PROTEIN YRBE4B	Not cytoplasm	Not extracellular	plasma membrane	Plasma membrane	CytoplasmicMembrane	0.91425	Rv3500c 5 0 i55-85o105-127i161-183o211-234i255-273o	ExpAA=117.98	First60=5.70	PredHel=5	Topology=i56-78o106-128i161-183o211-233i254-276o
Rv3501c	CONSERVED HYPOTHETICAL INTEGRAL MEMBRANE PROTEIN YRBE4A	Not cytoplasm	Not extracellular	plasma membrane	Plasma membrane	CytoplasmicMembrane	0.956404	Rv3501c 6 0 i48-70o90-114i135-159o165-185i197-213o229-249i	ExpAA=125.72	First60=14.65	PredHel=6	Topology=i48-70o92-114i135-157o162-184i197-214o229-251i
Rv3503c	PROBABLE FERREDOXIN FDXD	cytoplasm	Not extracellular	Not plasma membrane	Cytoplasm	Cytoplasmic	0.61552	Rv3503c 0 0 i	ExpAA=0.00	First60=0.00	PredHel=0	Topology=i
Rv3507	PE-PGRS FAMILY PROTEIN	Not cytoplasm	Not extracellular	Not plasma membrane	Extracell	Extracellular	0.933388	Rv3507 0 0 i	ExpAA=0.89	First60=0.00	PredHel=0	Topology=o
Rv3508	PE-PGRS FAMILY PROTEIN	Not cytoplasm	Not extracellular	Not plasma membrane	Extracell	Extracellular	0.876762	Rv3508 0 Y n3-14c32/33o	ExpAA=1.22	First60=0.02	PredHel=0	Topology=o	*
Rv3511	PE-PGRS FAMILY PROTEIN	Not cytoplasm	Not extracellular	Not plasma membrane	Extracell	Extracellular	0.864648	Rv3511 0 0 i	ExpAA=0.45	First60=0.02	PredHel=0	Topology=o	*
Rv3512	PE-PGRS FAMILY PROTEIN	Not cytoplasm	Not extracellular	Not plasma membrane	Extracell	Extracellular	0.952017	Rv3512 0 0 i	ExpAA=0.02	First60=0.02	PredHel=0	Topology=o		*
Rv3514	PE-PGRS FAMILY PROTEIN	Not cytoplasm	Not extracellular	Not plasma membrane	Extracell	Extracellular	0.919015	Rv3514 0 Y n3-14c32/33o	ExpAA=1.12	First60=0.02	PredHel=0	Topology=o	*
Rv3524	PROBABLE CONSERVED MEMBRANE PROTEIN	cytoplasm	Not extracellular	Not plasma membrane	Cytoplasm	Unknown	0.936845	Rv3524 1 0 i51-73o	ExpAA=22.68	First60=9.95	PredHel=1	Topology=i51-73o
Rv3533c	PPE FAMILY PROTEIN	Not cytoplasm	Not extracellular	plasma membrane	Extracell	Extracellular	0.877718	Rv3533c 0 0 i	ExpAA=3.03	First60=1.94	PredHel=0	Topology=o	*
Rv3547	CONSERVED HYPOTHETICAL PROTEIN	No Prediction	No Prediction	No Prediction	Cytoplasm	Unknown	0.685812	Rv3547 0 0 i	ExpAA=0.00	First60=0.00	PredHel=0	Topology=o
Rv3554	POSSIBLE ELECTRON TRANSFER PROTEIN FDXB	cytoplasm	Not extracellular	Not plasma membrane	Cytoplasm	CytoplasmicMembrane	0.550518	Rv3554 6 0 i42-65o71-89i110-129o149-166i178-199o205-226i	ExpAA=99.84	First60=18.23	PredHel=4	Topology=o39-61i68-90o105-127i191-213o
Rv3558	PPE FAMILY PROTEIN	Not cytoplasm	Not extracellular	plasma membrane	Extracell	CytoplasmicMembrane	0.748442	Rv3558 0 0 i	ExpAA=0.58	First60=0.08	PredHel=0	Topology=o
Rv3572	HYPOTHETICAL PROTEIN	No Prediction	No Prediction	No Prediction	Extracell	Unknown	0.897681	Rv3572 0 Y n7-18c24/25o	ExpAA=2.00	First60=1.99	PredHel=0	Topology=o	*
Rv3578	POSSIBLE ARSENICAL PUMP INTEGRAL MEMBRANE PROTEIN ARSB2	Not cytoplasm	Not extracellular	plasma membrane	Plasma membrane	CytoplasmicMembrane	0.963841	Rv3578 12 Y n3-14c19/20o29-45i52-69o99-125i137-155o175-195i215-233o239-257i269-294o306-324i331-352o358-373i385	ExpAA=249.71	First60=46.48	PredHel=12	Topology=i2-19o23-45i52-69o102-124i136-158o173-195i215-232o236-253i266-288o303-325i332-354o385-407i	*
Rv3584	POSSIBLE CONSERVED LIPOPROTEIN LPQE	Not cytoplasm	Not extracellular	plasma membrane	Extracell	Unknown	0.559516	Rv3584 0 Y n16-27c32/33o	ExpAA=18.55	First60=18.53	PredHel=1	Topology=i13-35o	*		*
Rv3587c	PROBABLE CONSERVED MEMBRANE PROTEIN	cytoplasm	extracellular	Not plasma membrane	Extracell	Unknown	0.934944	Rv3587c 1 0 i21-41o	ExpAA=21.83	First60=21.64	PredHel=1	Topology=i20-42o	*
Rv3590c	PE-PGRS FAMILY PROTEIN	Not cytoplasm	Not extracellular	plasma membrane	Extracell	Extracellular	0.824508	Rv3590c 0 0 i	ExpAA=0.69	First60=0.26	PredHel=0	Topology=o	*
Rv3595c	PE-PGRS FAMILY PROTEIN	Not cytoplasm	Not extracellular	plasma membrane	Extracell	Unknown	0.789659	Rv3595c 0 0 i	ExpAA=0.13	First60=0.05	PredHel=0	Topology=o	*
Rv3604c	PROBABLE CONSERVED TRANSMEMBRANE PROTEIN RICH IN ALANINE AND ARGININE AND PROLINE	cytoplasm	Not extracellular	Not plasma membrane	Cytoplasm	Cytoplasmic	0.87975	Rv3604c 2 0 i84-103o109-131i	ExpAA=42.64	First60=0.00	PredHel=2	Topology=i82-104o109-131i
Rv3605c	PROBABLE CONSERVED SECRETED PROTEIN	Not cytoplasm	Not extracellular	plasma membrane	Plasma membrane	CytoplasmicMembrane	0.963821	Rv3605c 4 0 i9-28o34-52i88-107o119-139i	ExpAA=79.54	First60=39.82	PredHel=4	Topology=i9-31o36-53i86-105o120-139i
Rv3611	HYPOTHETICAL ARGININE AND PROLINE RICH PROTEIN	cytoplasm	Not extracellular	Not plasma membrane	Cytoplasm	Unknown	0.856026	Rv3611 0 0 i	ExpAA=0.00	First60=0.00	PredHel=0	Topology=o
Rv3613c	HYPOTHETICAL PROTEIN	No Prediction	No Prediction	No Prediction	Extracell	Unknown	0.735592	Rv3613c 0 0 i	ExpAA=0.00	First60=0.00	PredHel=0	Topology=i
Rv3629c	PROBABLE CONSERVED INTEGRAL MEMBRANE PROTEIN	Not cytoplasm	Not extracellular	plasma membrane	Plasma membrane	CytoplasmicMembrane	0.968713	Rv3629c 10 0 i7-24o30-54i66-91o127-148i169-188o194-212i244-265o271-293i302-323o329-346i	ExpAA=212.00	First60=40.83	PredHel=10	Topology=i7-26o31-53i66-88o126-148i169-188o198-215i244-266o271-293i306-323o328-350i	*
Rv3630	PROBABLE CONSERVED INTEGRAL MEMBRANE PROTEIN	Not cytoplasm	Not extracellular	plasma membrane	Plasma membrane	CytoplasmicMembrane	0.962087	Rv3630 12 0 i36-55o61-84i111-131o143-165i172-193o199-218i239-261o273-292i312-333o353-377i384-403o409-427i	ExpAA=253.09	First60=22.00	PredHel=11	Topology=o33-55i62-84o114-136i143-165o193-215i236-258o268-290i311-333o353-375i382-401o405-427i		*
Rv3632	POSSIBLE CONSERVED MEMBRANE PROTEIN	Not cytoplasm	Not extracellular	plasma membrane	Cytoplasm	CytoplasmicMembrane	0.951538	Rv3632 3 0 o6-23i30-48o68-88i	ExpAA=56.57	First60=36.86	PredHel=3	Topology=o4-21i30-48o68-85i
Rv3635	PROBABLE CONSERVED TRANSMEMBRANE PROTEIN	Not cytoplasm	Not extracellular	plasma membrane	Plasma membrane	CytoplasmicMembrane	0.892297	Rv3635 12 Y n9-19c28/29o38-56i63-81o87-107i114-135o141-158i170-197o217-235i247-265o285-304i311-330o350-368i380	ExpAA=224.17	First60=24.11	PredHel=9	Topology=i13-35o70-92i113-135o171-193i214-236o280-302i309-328o343-362i383-405o	*
Rv3645	PROBABLE CONSERVED TRANSMEMBRANE PROTEIN	Not cytoplasm	Not extracellular	plasma membrane	Plasma membrane	CytoplasmicMembrane	0.841464	Rv3645 6 0 i45-65o85-106i140-162o168-189i220-241o253-278i	ExpAA=134.06	First60=17.69	PredHel=6	Topology=i43-65o85-107i140-162o167-189i216-238o258-280i		*
Rv3653	PE-PGRS FAMILY-RELATED PROTEIN	Not cytoplasm	Not extracellular	plasma membrane	Extracell	Unknown	0.512388	Rv3653 0 0 i	ExpAA=2.00	First60=0.07	PredHel=0	Topology=o
Rv3655c	CONSERVED HYPOTHETICAL PROTEIN	Not cytoplasm	Not extracellular	plasma membrane	Plasma membrane	Cytoplasmic	0.613732	Rv3655c 0 Y n3-18c23/24o	ExpAA=21.96	First60=21.94	PredHel=1	Topology=o4-26i	*		*
Rv3656c	CONSERVED HYPOTHETICAL PROTEIN	No Prediction	No Prediction	No Prediction	Plasma membrane	Unknown	0.532337	Rv3656c 1 Y n2-12c18/19o34-56i	ExpAA=21.50	First60=21.49	PredHel=1	Topology=o34-56i
Rv3657c	POSSIBLE CONSERVED ALANINE RICH MEMBRANE PROTEIN	cytoplasm	Not extracellular	Not plasma membrane	Plasma membrane	Unknown	0.68035	Rv3657c 2 Y n2-12c16/17o40-70i161-182o	ExpAA=46.77	First60=13.70	PredHel=2	Topology=o48-70i161-183o
Rv3658c	PROBABLE CONSERVED TRANSMEMBRANE PROTEIN	cytoplasm	Not extracellular	Not plasma membrane	Plasma membrane	CytoplasmicMembrane	0.755792	Rv3658c 3 Y n4-15c19/20o43-75i206-226o238-256i	ExpAA=86.09	First60=28.18	PredHel=3	Topology=o43-75i202-224o234-256i
Rv3664c	PROBABLE DIPEPTIDE-TRANSPORT INTEGRAL MEMBRANE PROTEIN ABC TRANSPORTER DPPC	Not cytoplasm	Not extracellular	plasma membrane	Plasma membrane	CytoplasmicMembrane	0.94592	Rv3664c 6 Y n3-14c22/23o64-87i99-118o124-143i174-194o200-220i232-249o	ExpAA=136.14	First60=21.09	PredHel=6	Topology=i5-27o67-89i102-119o124-143i174-196o231-253i	*
Rv3665c	PROBABLE DIPEPTIDE-TRANSPORT INTEGRAL MEMBRANE PROTEIN ABC TRANSPORTER DPPB	Not cytoplasm	Not extracellular	plasma membrane	Plasma membrane	CytoplasmicMembrane	0.916867	Rv3665c 6 0 i9-30o97-119i131-155o175-191i233-255o275-301i	ExpAA=136.85	First60=21.77	PredHel=6	Topology=i9-31o98-120i133-155o170-192i229-251o279-301i	*
Rv3669	PROBABLE CONSERVED TRANSMEMBRANE PROTEIN	Not cytoplasm	Not extracellular	plasma membrane	Cytoplasm	Unknown	0.88817	Rv3669 2 0 i69-90o96-123i	ExpAA=45.80	First60=0.00	PredHel=2	Topology=i68-90o100-122i
Rv3671c	POSSIBLE MEMBRANE-ASSOCIATED SERINE PROTEASE	Not cytoplasm	Not extracellular	plasma membrane	Plasma membrane	CytoplasmicMembrane	0.573972	Rv3671c 4 0 o6-25i32-52o64-86i98-120o	ExpAA=86.91	First60=42.07	PredHel=4	Topology=o4-23i30-52o62-84i96-118o
Rv3673c	POSSIBLE MEMBRANE-ANCHORED THIOREDOXIN-LIKE PROTEIN (THIOL-DISULFIDE INTERCHANGE RELATED PROTEIN)	Not cytoplasm	Not extracellular	plasma membrane	Plasma membrane	Unknown	0.649998	Rv3673c 1 0 o20-39i	ExpAA=20.96	First60=20.45	PredHel=1	Topology=o20-42i
Rv3675	POSSIBLE MEMBRANE PROTEIN	cytoplasm	Not extracellular	Not plasma membrane	Cytoplasm	Unknown	0.884749	Rv3675 0 Y n3-14c20/21o	ExpAA=22.46	First60=22.46	PredHel=1	Topology=o4-26i
Rv3682	PROBABLE BIFUNCTIONAL MEMBRANE-ASSOCIATED PENICILLIN-BINDING PROTEIN 1A/1B PONA2 (MUREIN POLYMERASE) [INCLUDES: PENICILLIN-INSENSITIVE TRANSGLYCOSYLASE (PEPTIDOGLYCAN TGASE) + PENICILLIN-SENSITIVE TRANSPEPTIDASE (DD-TRANSPEPTIDASE)]	Not cytoplasm	Not extracellular	plasma membrane	Extracell	Extracellular	0.693891	Rv3682 0 Y n7-20c27/28o	ExpAA=22.23	First60=22.23	PredHel=1	Topology=i7-29o	*
Rv3686c	CONSERVED HYPOTHETICAL PROTEIN	Not cytoplasm	Not extracellular	plasma membrane	Extracell	Unknown	0.89065	Rv3686c 1 0 o32-65i	ExpAA=35.22	First60=27.06	PredHel=1	Topology=o34-65i
Rv3689	PROBABLE CONSERVED TRANSMEMBRANE PROTEIN	Not cytoplasm	Not extracellular	Not plasma membrane	Plasma membrane	CytoplasmicMembrane	0.911747	Rv3689 6 0 i155-179o199-226i247-279o291-315i335-362o382-410i	ExpAA=143.54	First60=0.00	PredHel=6	Topology=i153-175o207-229i250-272o292-314i335-357o388-410i
Rv3690	PROBABLE CONSERVED MEMBRANE PROTEIN	No Prediction	No Prediction	No Prediction	Cytoplasm	Unknown	0.756171	Rv3690 1 0 o55-76i	ExpAA=22.66	First60=8.73	PredHel=1	Topology=o51-73i
Rv3694c	POSSIBLE CONSERVED TRANSMEMBRANE PROTEIN	Not cytoplasm	Not extracellular	plasma membrane	Plasma membrane	CytoplasmicMembrane	0.941763	Rv3694c 5 0 i102-122o167-188i209-237o257-279i286-306o	ExpAA=120.91	First60=0.00	PredHel=6	Topology=i102-124o166-188i193-215o219-238i258-280o285-307i
Rv3695	POSSIBLE CONSERVED MEMBRANE PROTEIN	cytoplasm	Not extracellular	Not plasma membrane	Cytoplasm	Cytoplasmic	0.817873	Rv3695 3 0 o23-47i54-74o106-127i	ExpAA=61.91	First60=28.65	PredHel=3	Topology=i21-43o53-75i111-133o
Rv3706c	CONSERVED HYPOTHETICAL PROLINE RICH PROTEIN	Not cytoplasm	Not extracellular	Not plasma membrane	Extracell	Unknown	0.942207	Rv3706c 1 0 o24-48i	ExpAA=22.86	First60=22.86	PredHel=1	Topology=i26-48o
Rv3707c	CONSERVED HYPOTHETICAL PROTEIN	No Prediction	No Prediction	No Prediction	Extracell	Unknown	0.925635	Rv3707c 0 0 i	ExpAA=0.00	First60=0.00	PredHel=0	Topology=o
Rv3718c	CONSERVED HYPOTHETICAL PROTEIN	cytoplasm	Not extracellular	Not plasma membrane	Cytoplasm	Unknown	0.775911	Rv3718c 0 0 i	ExpAA=0.03	First60=0.00	PredHel=0	Topology=o
Rv3723	PROBABLE CONSERVED TRANSMEMBRANE PROTEIN	cytoplasm	Not extracellular	Not plasma membrane	Cytoplasm	CytoplasmicMembrane	0.953996	Rv3723 4 0 i7-26o46-64i85-107o113-136i	ExpAA=89.26	First60=40.73	PredHel=4	Topology=i5-27o42-64i77-99o114-136i
Rv3724	PROBABLE CUTINASE PRECURSOR [FIRST PART] CUT5A	Not cytoplasm	extracellular	Not plasma membrane	Extracell	Unknown	0.547535	Rv3724 0 0 i	ExpAA=0.24	First60=0.00	PredHel=0	Topology=o
Rv3728	PROBABLE CONSERVED TWO-DOMAIN MEMBRANE PROTEIN	Not cytoplasm	Not extracellular	plasma membrane	Plasma membrane	CytoplasmicMembrane	0.759074	Rv3728 14 0 i41-64o84-101i108-127o133-155i167-188o194-212i232-248o254-275i296-320o332-351i358-376o396-415i436	ExpAA=307.80	First60=20.03	PredHel=13	Topology=i41-63o78-100i107-129o133-155i167-189o195-217i230-248o253-275i295-317o332-354i361-378o393-415i436-458o
Rv3737	PROBABLE CONSERVED TRANSMEMBRANE PROTEIN	Not cytoplasm	Not extracellular	plasma membrane	Plasma membrane	CytoplasmicMembrane	0.916058	Rv3737 9 0 o159-188i208-229o235-253i265-285o314-333i340-361o367-385i392-416o428-449i	ExpAA=197.15	First60=0.04	PredHel=9	Topology=o165-187i207-229o234-253i265-287o314-336i341-363o367-384i391-413o428-450i
Rv3738c	PPE FAMILY PROTEIN	Not cytoplasm	Not extracellular	plasma membrane	Extracell	CytoplasmicMembrane	0.557561	Rv3738c 3 0 i104-122o128-154i161-181o	ExpAA=84.17	First60=11.62	PredHel=3	Topology=i79-101o106-128i135-157o
Rv3742c	POSSIBLE OXIDOREDUCTASE	Not cytoplasm	Not extracellular	Not plasma membrane	Cytoplasm	Unknown	0.949347	Rv3742c 2 0 o12-30i102-121o	ExpAA=38.94	First60=16.99	PredHel=2	Topology=o11-30i105-127o
Rv3743c	PROBABLE CATION TRANSPORTER P-TYPE ATPASE CTPJ	Not cytoplasm	Not extracellular	plasma membrane	Plasma membrane	CytoplasmicMembrane	0.658871	Rv3743c 7 0 i31-49o55-73i85-102o108-126i259-277o289-313i598-616o	ExpAA=130.87	First60=21.62	PredHel=5	Topology=i33-55o92-114i259-281o291-313i598-620o
Rv3756c	POSSIBLE OSMOPROTECTANT (GLYCINE BETAINE/CARNITINE/CHOLINE/L-PROLINE) TRANSPORT INTEGRAL MEMBRANE PROTEIN ABC TRANSPORTER PROZ	Not cytoplasm	Not extracellular	plasma membrane	Plasma membrane	CytoplasmicMembrane	0.943901	Rv3756c 6 Y n3-14c24/25o34-53i60-87o93-112i133-151o157-177i189-212o	ExpAA=109.70	First60=26.38	PredHel=5	Topology=o31-53i66-88o93-115i155-177o192-214i
Rv3757c	POSSIBLE OSMOPROTECTANT (GLYCINE BETAINE/CARNITINE/CHOLINE/L-PROLINE) TRANSPORT INTEGRAL MEMBRANE PROTEIN ABC TRANSPORTER PROW	Not cytoplasm	Not extracellular	plasma membrane	Plasma membrane	CytoplasmicMembrane	0.912206	Rv3757c 5 0 o20-40i52-75o81-100i134-167o179-200i	ExpAA=111.02	First60=30.24	PredHel=5	Topology=i21-40o55-74i81-100o145-167i179-201o
Rv3760	POSSIBLE CONSERVED MEMBRANE PROTEIN	No Prediction	No Prediction	No Prediction	Plasma membrane	Unknown	0.942859	Rv3760 2 0 i21-41o61-85i	ExpAA=45.81	First60=25.03	PredHel=2	Topology=i20-42o57-79i	*
Rv3763	19 KDA LIPOPROTEIN ANTIGEN PRECURSOR LPQH	Not cytoplasm	Not extracellular	plasma membrane	Extracell	Unknown	0.803449	Rv3763 0 Y n5-16c21/22o	ExpAA=11.67	First60=7.64	PredHel=0	Topology=o	*		*
Rv3766	HYPOTHETICAL PROTEIN	Not cytoplasm	Not extracellular	plasma membrane	Extracell	Unknown	0.612629	Rv3766 0 0 i	ExpAA=0.06	First60=0.04	PredHel=0	Topology=o
Rv3770c	HYPOTHETICAL LEUCINE RICH PROTEIN	Not cytoplasm	Not extracellular	plasma membrane	Plasma membrane	CytoplasmicMembrane	0.973327	Rv3770c 5 0 o20-36i48-69o81-106i118-144o164-183i	ExpAA=110.47	First60=33.62	PredHel=5	Topology=o15-36i48-70o85-107i124-146o166-188i
Rv3779	PROBABLE CONSERVED TRANSMEMBRANE PROTEIN ALANINE AND LEUCINE RICH	cytoplasm	Not extracellular	Not plasma membrane	Plasma membrane	CytoplasmicMembrane	0.948004	Rv3779 13 Y n3-14c21/22o31-54i61-84o96-118i166-185o191-212i232-254o260-277i289-317o329-347i393-412o432-448i460	ExpAA=294.44	First60=44.41	PredHel=13	Topology=i2-21o31-53i60-82o97-119i190-212o232-254i259-281o296-318i331-353o389-408i415-437o457-479i492-514o
Rv3783	PROBABLE O-ANTIGEN/LIPOPOLYSACCHARIDE TRANSPORT INTEGRAL MEMBRANE PROTEIN ABC TRANSPORTER RFBD	Not cytoplasm	Not extracellular	plasma membrane	Plasma membrane	CytoplasmicMembrane	0.956616	Rv3783 6 0 i50-71o83-108i128-150o162-182i189-208o250-269i	ExpAA=128.80	First60=11.32	PredHel=6	Topology=i49-71o86-108i128-150o160-182i189-208o251-268i
Rv3789	POSSIBLE CONSERVED INTEGRAL MEMBRANE PROTEIN	Not cytoplasm	Not extracellular	plasma membrane	Plasma membrane	CytoplasmicMembrane	0.97618	Rv3789 4 0 i7-25o31-48i60-79o91-112i	ExpAA=80.33	First60=38.58	PredHel=4	Topology=i7-29o34-53i60-79o89-111i
Rv3792	PROBABLE CONSERVED TRANSMEMBRANE PROTEIN	Not cytoplasm	Not extracellular	plasma membrane	Plasma membrane	CytoplasmicMembrane	0.944713	Rv3792 13 0 i25-51o63-85i97-117o183-200i207-222o228-247i254-272o278-295i307-329o357-375i387-407o419-439i446	ExpAA=267.42	First60=23.14	PredHel=13	Topology=i27-49o64-86i99-118o183-200i207-224o229-248i255-272o276-293i306-328o353-375i382-404o414-436i443-465o
Rv3793	INTEGRAL MEMBRANE INDOLYLACETYLINOSITOL ARABINOSYLTRANSFERASE EMBC (ARABINOSYLINDOLYLACETYLINOSITOL SYNTHASE)	Not cytoplasm	Not extracellular	plasma membrane	Plasma membrane	CytoplasmicMembrane	0.861713	Rv3793 13 0 i28-50o231-251i263-286o342-364i376-392o422-455i467-488o531-552i564-582o588-609i621-641o661-679i700	ExpAA=287.77	First60=21.93	PredHel=13	Topology=i28-50o232-251i264-286o341-360i373-392o431-453i466-488o530-552i565-582o586-608i620-642o657-679i700-722o
Rv3794	INTEGRAL MEMBRANE INDOLYLACETYLINOSITOL ARABINOSYLTRANSFERASE EMBA (ARABINOSYLINDOLYLACETYLINOSITOL SYNTHASE)	Not cytoplasm	Not extracellular	plasma membrane	Plasma membrane	CytoplasmicMembrane	0.858807	Rv3794 13 0 i12-34o205-227i248-267o322-344i356-375o405-430i451-471o519-536i548-565o571-593i605-626o646-664i684	ExpAA=293.68	First60=22.71	PredHel=13	Topology=i12-34o205-224i247-269o322-344i356-375o408-430i451-470o519-536i543-565o575-597i604-626o641-663i684-706o	*
Rv3795	INTEGRAL MEMBRANE INDOLYLACETYLINOSITOL ARABINOSYLTRANSFERASE EMBB (ARABINOSYLINDOLYLACETYLINOSITOL SYNTHASE)	Not cytoplasm	Not extracellular	plasma membrane	Plasma membrane	CytoplasmicMembrane	0.8639	Rv3795 13 0 i28-47o219-237i275-293o348-370i382-398o431-456i476-495o541-558i570-587o593-614i626-648o668-689i701	ExpAA=269.30	First60=21.92	PredHel=12	Topology=o28-50i217-239o271-293i402-419o434-456i472-494o541-558i570-587o597-619i626-648o663-685i698-720o		*
Rv3796	SERVED HYPOTHETICAL PROTEIN	cytoplasm	Not extracellular	Not plasma membrane	Extracell	Unknown	0.527633	Rv3796 0 Y n24-35c40/41o	ExpAA=3.78	First60=3.69	PredHel=0	Topology=o	*	*
Rv3802c	PROBABLE CONSERVED MEMBRANE PROTEIN	Not cytoplasm	extracellular	Not plasma membrane	Extracell	Cytoplasmic	0.691803	Rv3802c 1 0 i12-36o	ExpAA=22.97	First60=22.95	PredHel=1	Topology=i12-34o	*	*
Rv3803c	SECRETED MPT51/MPB51 ANTIGEN PROTEIN FBPD (MPT51/MPB51 ANTIGEN 85 COMPLEX C) (AG58C) (MYCOLYL TRANSFERASE 85C) (FIBRONECTIN-BINDING PROTEIN C) (85C)	Not cytoplasm	extracellular	Not plasma membrane	Extracell	Extracellular	0.718674	Rv3803c 0 Y n10-21c26/27o	ExpAA=22.78	First60=20.55	PredHel=1	Topology=i5-27o	*	*
Rv3804c	SECRETED ANTIGEN 85-A FBPA (MYCOLYL TRANSFERASE 85A) (FIBRONECTIN-BINDING PROTEIN A) (ANTIGEN 85 COMPLEX A)	Not cytoplasm	extracellular	Not plasma membrane	Extracell	Extracellular	0.923099	Rv3804c 0 Y n18-29c34/35o	ExpAA=23.33	First60=22.55	PredHel=1	Topology=i19-41o	*	*
Rv3805c	PROBABLE CONSERVED TRANSMEMBRANE PROTEIN	Not cytoplasm	Not extracellular	plasma membrane	Plasma membrane	CytoplasmicMembrane	0.893127	Rv3805c 10 Y n4-16c20/21o81-100i112-128o134-156i168-185o191-207i212-231o264-283i304-327o339-358i370-388o	ExpAA=199.53	First60=18.88	PredHel=9	Topology=i5-22o81-103i134-156o176-198i211-233o264-283i304-326o336-358i370-389o
Rv3806c	POSSIBLE CONSERVED INTEGRAL MEMBRANE PROTEIN	Not cytoplasm	Not extracellular	plasma membrane	Plasma membrane	CytoplasmicMembrane	0.945831	Rv3806c 9 0 i26-46o52-72i92-111o117-134i146-163o175-194i217-238o244-263i283-301o	ExpAA=163.96	First60=19.79	PredHel=7	Topology=o55-72i92-114o118-140i161-183o216-238i245-264o284-301i
Rv3807c	POSSIBLE CONSERVED TRANSMEMBRANE PROTEIN	Not cytoplasm	Not extracellular	plasma membrane	Plasma membrane	CytoplasmicMembrane	0.8945	Rv3807c 4 0 i24-43o49-66i113-132o138-156i	ExpAA=71.83	First60=34.30	PredHel=3	Topology=o20-42i49-66o139-158i
Rv3810	EXPORTED REPETITIVE PROTEIN PRECURSOR PIRG (CELL SURFACE PROTEIN) (EXP53)	Not cytoplasm	Not extracellular	plasma membrane	Extracell	Unknown	0.944793	Rv3810 0 Y n9-17c22/23o	ExpAA=18.09	First60=18.08	PredHel=1	Topology=i9-31o	*	*
Rv3811	CONSERVED HYPOTHETICAL PROTEIN	Not cytoplasm	extracellular	Not plasma membrane	Extracell	Extracellular	0.735899	Rv3811 0 Y n2-12c19/20o	ExpAA=0.00	First60=0.00	PredHel=0	Topology=o
Rv3821	PROBABLE CONSERVED INTEGRAL MEMBRANE PROTEIN	cytoplasm	Not extracellular	Not plasma membrane	Plasma membrane	CytoplasmicMembrane	0.963484	Rv3821 6 0 o6-26i33-59o71-92i136-165o171-195i216-234o	ExpAA=130.34	First60=45.20	PredHel=6	Topology=o4-26i33-55o70-92i135-157o172-194i218-235o
Rv3823c	PROBABLE CONSERVED INTEGRAL MEMBRANE TRANSPORT PROTEIN MMPL8	Not cytoplasm	Not extracellular	plasma membrane	Plasma membrane	CytoplasmicMembrane	0.755991	Rv3823c 11 0 o43-61i218-235o241-269i319-342o348-371i403-424o871-890i897-922o928-948i969-994o1014-1035i	ExpAA=256.85	First60=15.85	PredHel=12	Topology=i44-66o220-242i247-269o273-295i316-338o348-370i402-424o873-895i900-922o928-950i963-985o989-1011i
Rv3831	HYPOTHETICAL PROTEIN	No Prediction	No Prediction	No Prediction	Plasma membrane	CytoplasmicMembrane	0.963719	Rv3831 2 Y n2-12c16/17o40-58i123-143o	ExpAA=64.48	First60=40.52	PredHel=3	Topology=i2-19o34-56i123-145o	*
Rv3835	PROBABLE CONSERVED MEMBRANE PROTEIN	Not cytoplasm	Not extracellular	Not plasma membrane	Extracell	Extracellular	0.812554	Rv3835 1 0 i44-66o	ExpAA=22.55	First60=16.88	PredHel=1	Topology=i44-66o
Rv3843c	PROBABLE CONSERVED TRANSMEMBRANE PROTEIN	cytoplasm	Not extracellular	Not plasma membrane	Plasma membrane	CytoplasmicMembrane	0.908343	Rv3843c 5 0 o127-147i159-192o212-236i248-270o282-301i	ExpAA=106.07	First60=0.00	PredHel=4	Topology=i128-150o165-187i247-269o279-301i		*
Rv3845	HYPOTHETICAL PROTEIN	No Prediction	No Prediction	No Prediction	Extracell	Cytoplasmic	0.699968	Rv3845 0 0 i	ExpAA=0.00	First60=0.00	PredHel=0	Topology=i
Rv3848	PROBABLE CONSERVED TRANSMEMBRANE PROTEIN	Not cytoplasm	Not extracellular	plasma membrane	Plasma membrane	CytoplasmicMembrane	0.923606	Rv3848 5 Y n3-14c18/19o34-55i67-84o137-160i167-185o191-213i	ExpAA=114.44	First60=23.73	PredHel=5	Topology=o34-56i63-85o138-160i167-184o194-216i
Rv3851	POSSIBLE MEMBRANE PROTEIN	No Prediction	No Prediction	No Prediction	Extracell	Unknown	0.949691	Rv3851 1 Y n21-39c47/48o71-90i	ExpAA=41.70	First60=20.81	PredHel=2	Topology=i21-40o71-90i	*	*
Rv3852	POSSIBLE HISTONE-LIKE PROTEIN HNS	Not cytoplasm	Not extracellular	Not plasma membrane	Extracell	Unknown	0.923444	Rv3852 1 0 o110-128i	ExpAA=19.87	First60=0.00	PredHel=1	Topology=o111-128i
Rv3857c	POSSIBLE MEMBRANE PROTEIN	No Prediction	No Prediction	No Prediction	Plasma membrane	Unknown	0.909945	Rv3857c 1 0 i39-61o	ExpAA=22.96	First60=21.85	PredHel=1	Topology=i39-61o
Rv3864	CONSERVED HYPOTHETICAL PROTEIN	Not cytoplasm	Not extracellular	plasma membrane	Extracell	Cytoplasmic	0.748748	Rv3864 1 0 o134-155i	ExpAA=24.74	First60=0.14	PredHel=1	Topology=o134-156i
Rv3869	POSSIBLE CONSERVED MEMBRANE PROTEIN	Not cytoplasm	Not extracellular	plasma membrane	Extracell	Unknown	0.6888	Rv3869 1 0 o44-64i	ExpAA=22.76	First60=20.27	PredHel=1	Topology=i39-61o
Rv3870	POSSIBLE CONSERVED TRANSMEMBRANE PROTEIN	Not cytoplasm	Not extracellular	plasma membrane	Cytoplasm	CytoplasmicMembrane	0.552021	Rv3870 2 0 o41-61i68-86o	ExpAA=60.38	First60=19.38	PredHel=3	Topology=i41-60o70-92i225-247o
Rv3874	10 KDA CULTURE FILTRATE ANTIGEN ESXB (LHP) (CFP10)	Not cytoplasm	extracellular	Not plasma membrane	Extracell	Extracellular	0.832174	Rv3874 0 0 i	ExpAA=0.00	First60=0.00	PredHel=0	Topology=i
Rv3875	6 KDA EARLY SECRETORY ANTIGENIC TARGET ESXA (ESAT-6)	Not cytoplasm	extracellular	Not plasma membrane	Extracell	Extracellular	0.642423	Rv3875 0 0 i	ExpAA=0.09	First60=0.09	PredHel=0	Topology=o
Rv3876	CONSERVED HYPOTHETICAL PROLINE AND ALANINE RICH PROTEIN	Not cytoplasm	Not extracellular	Not plasma membrane	Extracell	Extracellular	0.766392	Rv3876 0 0 i	ExpAA=0.05	First60=0.00	PredHel=0	Topology=o		*
Rv3877	PROBABLE CONSERVED TRANSMEMBRANE PROTEIN	Not cytoplasm	Not extracellular	plasma membrane	Plasma membrane	CytoplasmicMembrane	0.961663	Rv3877 11 0 i144-165o171-191i203-222o228-246i258-280o286-307i367-386o392-409i421-440o446-468i480-503o	ExpAA=237.67	First60=1.59	PredHel=11	Topology=i144-166o171-190i197-219o229-246i258-280o284-306i366-388o392-414i419-441o445-467i480-502o
Rv3878	CONSERVED HYPOTHETICAL ALANINE RICH PROTEIN	Not cytoplasm	Not extracellular	Not plasma membrane	Extracell	Unknown	0.835694	Rv3878 0 0 i	ExpAA=0.01	First60=0.01	PredHel=0	Topology=o
Rv3879c	HYPOTHETICAL ALANINE AND PROLINE RICH PROTEIN	Not cytoplasm	extracellular	Not plasma membrane	Extracell	Cellwall	0.644128	Rv3879c 0 0 i	ExpAA=0.16	First60=0.01	PredHel=0	Topology=o
Rv3881c	CONSERVED HYPOTHETICAL ALANINE AND GLYCINE RICH PROTEIN	cytoplasm	Not extracellular	Not plasma membrane	Cytoplasm	Cytoplasmic	0.572457	Rv3881c 0 0 i	ExpAA=0.02	First60=0.00	PredHel=0	Topology=o
Rv3886c	PROBABLE ALANINE AND PROLINE RICH MEMBRANE-ANCHORED MYCOSIN MYCP2 (SERINE PROTEASE) (SUBTILISIN-LIKE PROTEASE) (SUBTILASE-LIKE) (MYCOSIN-2)	Not cytoplasm	extracellular	Not plasma membrane	Extracell	Extracellular	0.702737	Rv3886c 1 Y n12-24c33/34o525-544i	ExpAA=25.06	First60=3.13	PredHel=1	Topology=o524-546i	*	*
Rv3887c	PROBABLE CONSERVED TRANSMEMBRANE PROTEIN	Not cytoplasm	Not extracellular	plasma membrane	Plasma membrane	CytoplasmicMembrane	0.953158	Rv3887c 11 0 i137-157o169-188i200-219o225-243i250-271o277-302i360-384o390-406i418-438o450-472i484-507o	ExpAA=238.02	First60=0.06	PredHel=11	Topology=i135-157o167-189i196-215o220-242i249-268o278-300i363-385o390-407i412-434o449-471i484-506o
Rv3897c	CONSERVED HYPOTHETICAL PROTEIN	Not cytoplasm	Not extracellular	plasma membrane	Cytoplasm	Unknown	0.898243	Rv3897c 0 Y n5-13c18/19o	ExpAA=13.05	First60=13.03	PredHel=0	Topology=o	*	*
Rv3898c	CONSERVED HYPOTHETICAL PROTEIN	Not cytoplasm	Not extracellular	plasma membrane	Extracell	Unknown	0.588047	Rv3898c 0 0 i	ExpAA=0.00	First60=0.00	PredHel=0	Topology=o
Rv3901c	POSSIBLE MEMBRANE PROTEIN	Not cytoplasm	extracellular	plasma membrane	Extracell	Unknown	0.78618	Rv3901c 1 0 o29-50i	ExpAA=22.26	First60=22.20	PredHel=1	Topology=i29-51o	*
Rv3903c	HYPOTHETICAL ALANINE AND PROLINE RICH PROTEIN	Not cytoplasm	extracellular	Not plasma membrane	Cytoplasm	Unknown	0.575527	Rv3903c 0 0 i	ExpAA=12.36	First60=12.18	PredHel=0	Topology=o		*
Rv3906c	CONSERVED HYPOTHETICAL PROTEIN	Not cytoplasm	extracellular	Not plasma membrane	Cytoplasm	Unknown	0.665124	Rv3906c 0 0 i	ExpAA=0.00	First60=0.00	PredHel=0	Topology=o
Rv3910	PROBABLE CONSERVED TRANSMEMBRANE PROTEIN	Not cytoplasm	Not extracellular	plasma membrane	Plasma membrane	CytoplasmicMembrane	0.904151	Rv3910 15 0 i45-63o69-88i100-125o145-166i178-197o213-235i255-273o293-314i335-363o375-395i407-427o439-460i480	ExpAA=331.91	First60=20.87	PredHel=15	Topology=i40-62o66-88i105-127o142-164i176-198o213-235i255-276o291-313i343-365o375-397i410-432o437-459i480-497o517-539i979-1001o
Rv3921c	PROBABLE CONSERVED TRANSMEMBRANE PROTEIN	Not cytoplasm	Not extracellular	plasma membrane	Cytoplasm	CytoplasmicMembrane	0.928833	Rv3921c 5 0 i12-31o37-55i103-126o192-210i235-260o	ExpAA=107.68	First60=40.25	PredHel=5	Topology=i7-29o39-56i104-126o192-214i235-257o
	Proteins where signal sequence was predicted with Phobius.
