# Supplementary material for: Computational Prediction and Experimental Assessment of Secreted/Surface Proteins from Mycobacterium tuberculosis H37Rv
Source: PLoS Comput Biol. 2010 Jun 24;6(6):e1000824. doi: 10.1371/journal.pcbi.1000824 (PMC2891697; doi:10.1371/journal.pcbi.1000824)
Supplement: Table S6 — Negative controls. This file contains the predictions yielded by the machine-learning tools for the 9 cytoplasmic proteins reported in TBsgc (File format: .xls). (0.03 MB XLS) [file pcbi.1000824.s006.xls]

## Sheet: Hoja1
Protein	Tuberculist annotation	Subcellular localization					LipoP 1.0	SignalP 3.0	Phobius	TatP 1.0	SecretomeP 2.0	TMHMM 2.0
		PA-SUB v.2.5			Gpos-PLoc	PSORTb v.2.0.4
		Cytoplasm	extracellular	plasma membrane								ExpAA	First60	Number of helices	Topology
Rv0126	TREHALOSE SYNTHASE TRES	cytoplasm	Not extracellular	Not plasma membrane	Cytoplasm	Cytoplasmic	CYT	0	Rv0126 1 601 NON CYTOPLASMIC	0.211	0.2747	ExpAA=0.03	First60=0.00	PredHel=0	Topology=o
Rv1326c	PROBABLE 1,4-ALPHA-GLUCAN BRANCHING ENZYME GLGB (GLYCOGEN BRANCHING ENZYME)	cytoplasm	Not extracellular	Not plasma membrane	Cytoplasm	Cytoplasmic	CYT	0	Rv1326c 1 731 NON CYTOPLASMIC	0.608	0.2224	ExpAA=0.02	First60=0.00	PredHel=0	Topology=o
Rv1328	PROBABLE GLYCOGEN PHOSPHORYLASE GLGP	cytoplasm	Not extracellular	Not plasma membrane	Cytoplasm	Cytoplasmic	CYT	0	Rv1328 1 863 NON CYTOPLASMIC	0.182	0.0743	ExpAA=0.10	First60=0.00	PredHel=0	Topology=o
Rv1562c	Maltooligosyltrehalose trehalohydrolase TreZ	Not cytoplasm	extracellular	Not plasma membrane	Cytoplasm	Cytoplasmic	CYT	0	Rv1562c 1 580 NON CYTOPLASMIC	0.471	0.2050	ExpAA=0.03	First60=0.00	PredHel=0	Topology=o
Rv1563c	Maltooligosyltrehalose synthase TreY	Not cytoplasm	extracellular	Not plasma membrane	Cytoplasm	Cytoplasmic	CYT	0	Rv1563c 1 765 NON CYTOPLASMIC	0.383	0.0681	ExpAA=0.04	First60=0.00	PredHel=0	Topology=o
Rv1564c	Probable Maltooligosyltrehalose synthase TreX	Not cytoplasm	extracellular	Not plasma membrane	Cytoplasm	Cytoplasmic	CYT	0	Rv1564c 1 721 NON CYTOPLASMIC	0.743	0.3922	ExpAA=0.01	First60=0.00	PredHel=0	Topology=o
Rv1781c	PROBABLE 4-ALPHA-GLUCANOTRANSFERASE MALQ (Amylomaltase) (Disproportionating enzyme)(D-enzyme)	cytoplasm	Not extracellular	Not plasma membrane	Cytoplasm	Cytoplasmic	CYT	0	Rv1781c 1 724 NON CYTOPLASMIC	0.247	0.1098	ExpAA=0.05	First60=0.04	PredHel=0	Topology=o
Rv2471	PROBABLE ALPHA-GLUCOSIDASE AGLA (MALTASE) (GLUCOINVERTASE) (GLUCOSIDOSUCRASE)	cytoplasm	Not extracellular	Not plasma membrane	Cytoplasm	Cytoplasmic	CYT	0	Rv2471 1 546 NON CYTOPLASMIC	0.784	0.3617	ExpAA=0.21	First60=0.00	PredHel=0	Topology=o
Rv2535c	PROBABLE CYTOPLASMIC PEPTIDASE PEPQ	No positive predictions			Cytoplasm	Cytoplasmic	CYT	0	Rv2535c 1 372 NON CYTOPLASMIC	0.639	0.0388	ExpAA=0.52	First60=0.42	PredHel=0	Topology=o
